# Supplementary material for: LC-MS/MS Analysis Unravels Deep Oxidation of Manganese Superoxide Dismutase in Kidney Cancer
Source: MDPI journal article supplement (doi:10.3390/ijms18020319), 2017-02-04
Supplement: s1 [file s1]

# Supplementary Materials: LC-MS/MS Analysis Unravels Deep Oxidation of Manganese Superoxide Dismutase in Kidney Cancer

Zuohui Zhao, Kazem M. Azadzo, Han-Pil Choi, Ruirui Jing, Xin Lu, Cuiling Li, Fengqin Wang, Jiaju Lu and Jing-Hua Yang

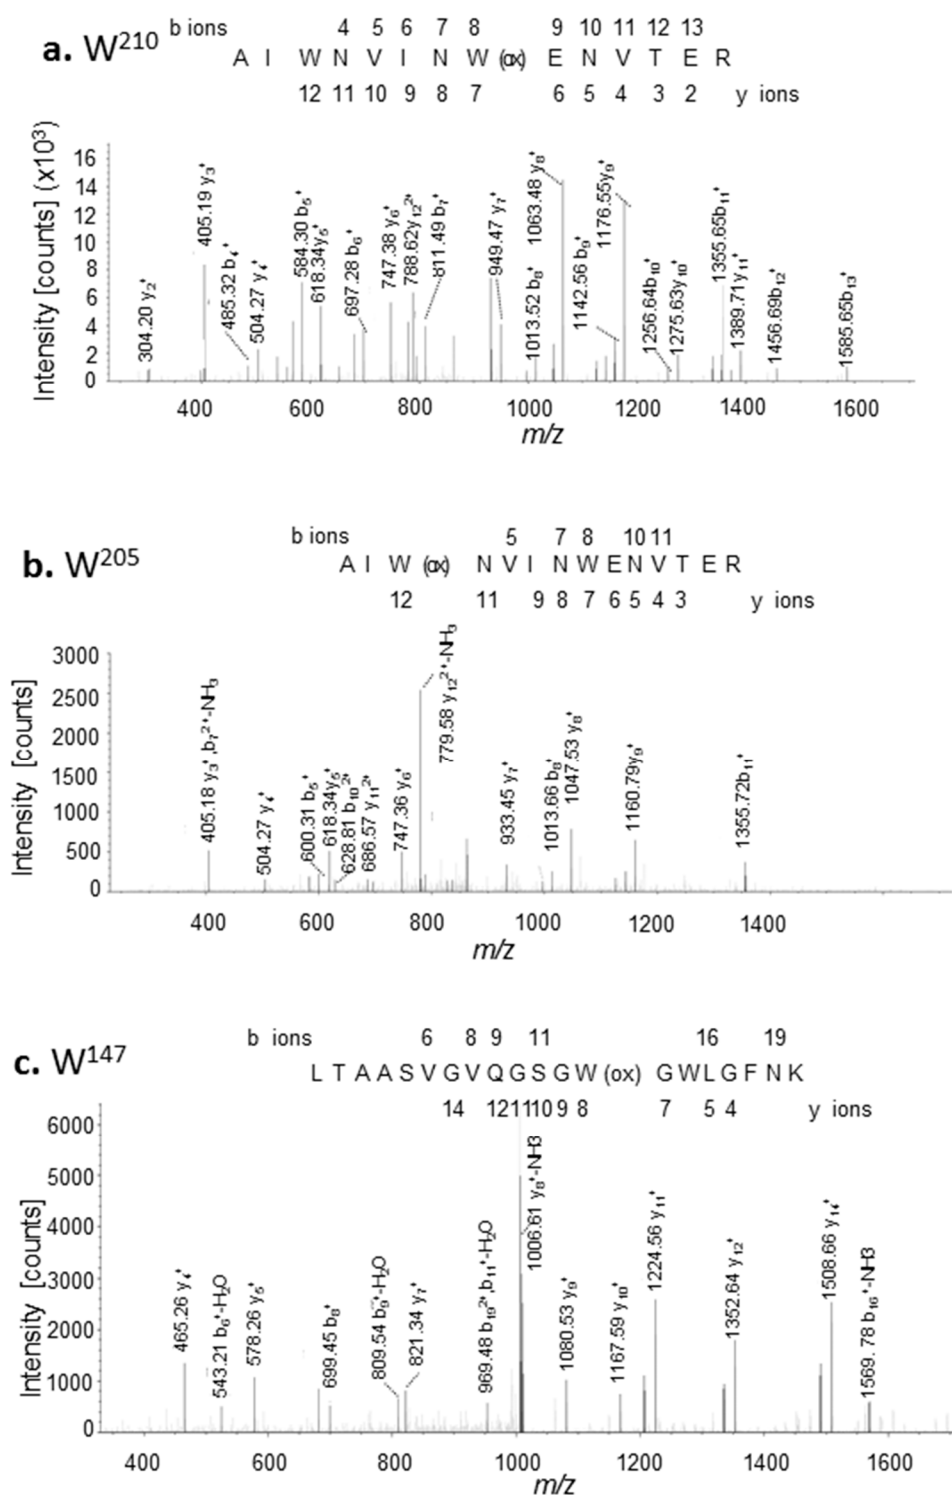

Figure S1. Cont.

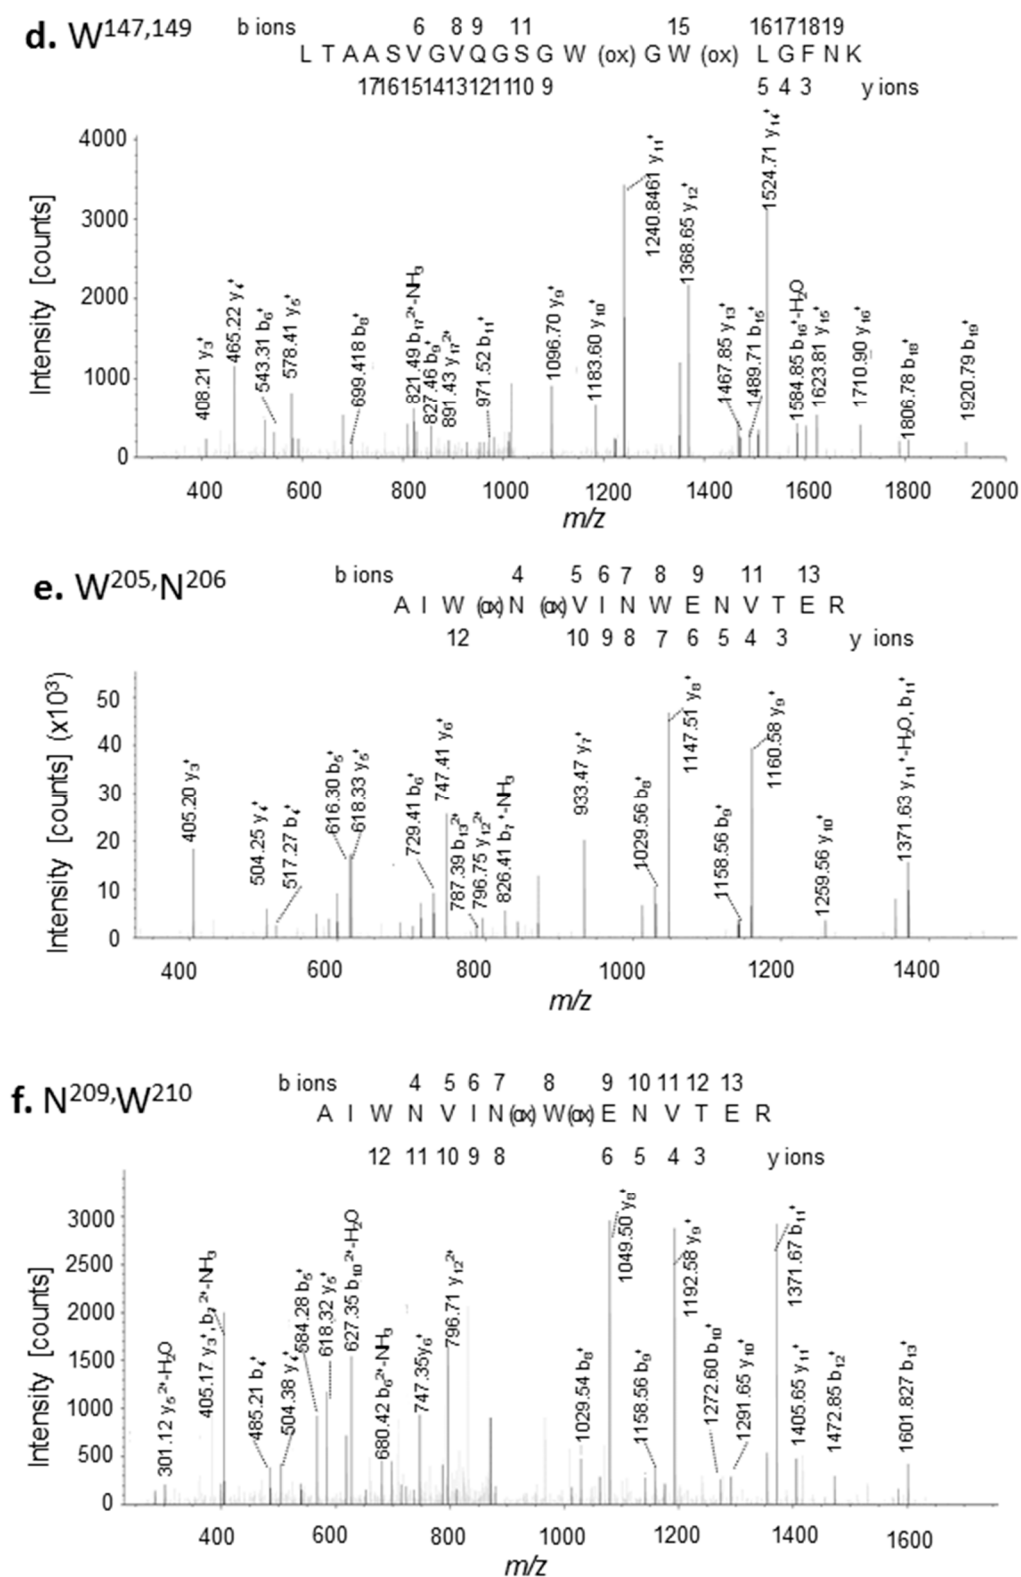

Figure S1. Cont.

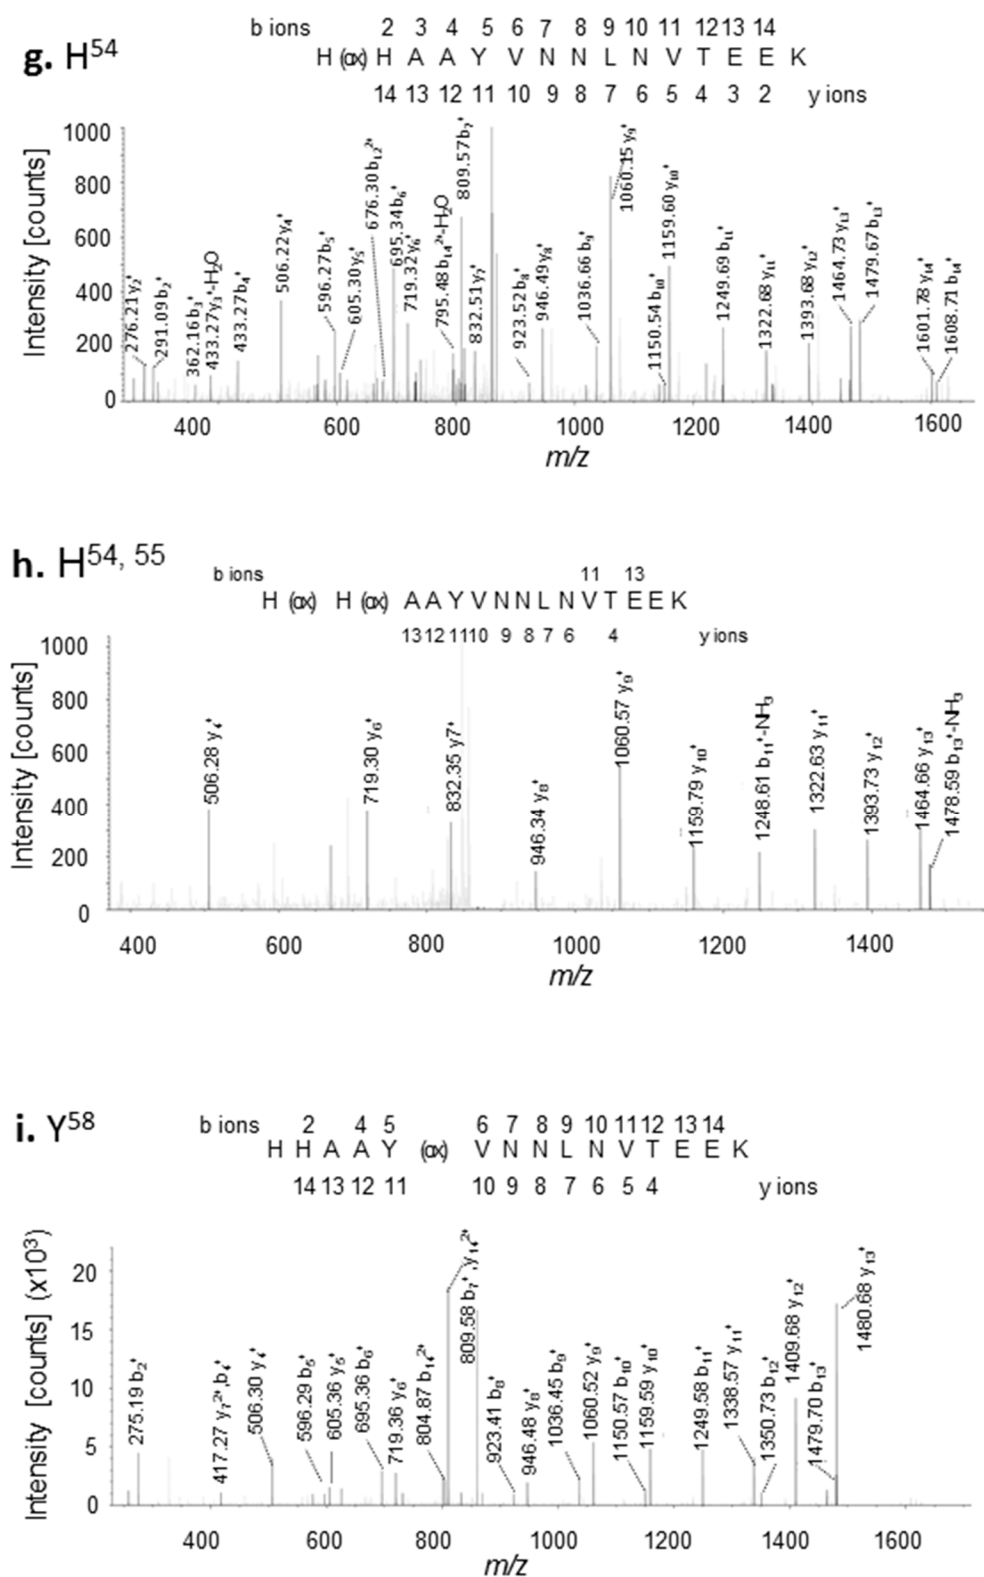

Figure S1. Cont.

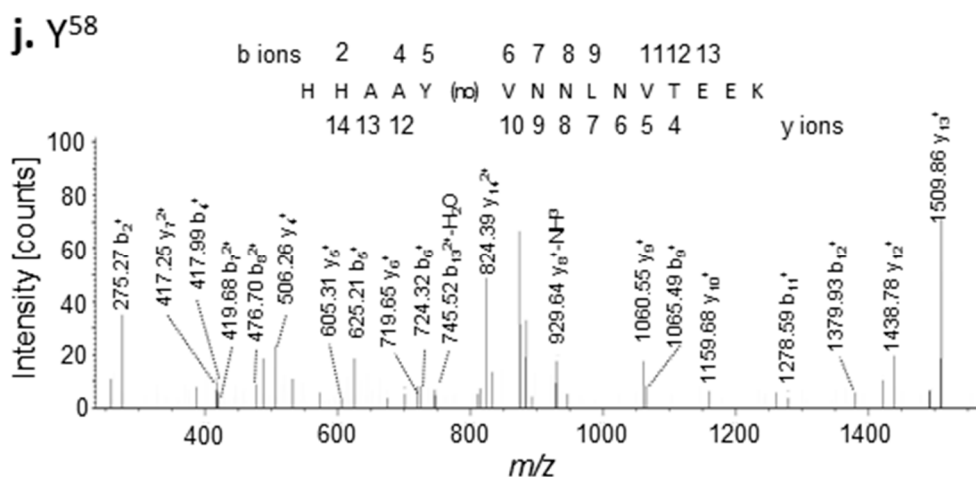

**Figure S1.** Mass spectra of oxidized/nitrated amino acid residues in MNSOD. The CID spectra of trypsin-digested peptides were searched against human database with a dynamic oxidative modification (+15.99) at some specific amino acid residues or with a dynamic nitrative modification (+44.98) at tyrosine residues. Typical oxidized peptides at W<sup>210</sup> (a); W<sup>205</sup> (b); W<sup>147</sup> (c); W<sup>147,149</sup> (d); W<sup>205</sup> and N<sup>206</sup> (e); N<sup>209</sup> and W<sup>210</sup> (f); H<sup>54</sup> (g); H<sup>54,55</sup> (h); Y<sup>58</sup> (i) and typical nitrated peptide at Y<sup>58</sup> (j) are shown. The matched b and y ions are labeled with their mass weights in Dalton. The peptide sequence is shown on the top of each panel, with the matched b and y ions labeled on the top or bottom of the residues, respectively. ox: oxidation, no: nitration.
