# Supplementary material for: LC-MS/MS Analysis Unravels Deep Oxidation of Manganese Superoxide Dismutase in Kidney Cancer
Source: Int J Mol Sci. 2017 Feb 4;18(2):319. doi: 10.3390/ijms18020319 (PMC5343855; doi:10.3390/ijms18020319)
Supplement: Supplementary file 1 [file ijms-18-00319-s001.zip › ijms-159250-SupplementaryTables-Proofreading.xlsx]

## Sheet: Cover_Page
LC-MS/MS analysis unravels deep oxidation of manganese superoxide dismutase in kidney cancer
Zuohui Zhao1,2, Kazem M. Azadzoi3, Han-Pil Choi3, Ruirui Jing1, Xin Lu1, Cuiling Li1, Fengqin Wang1, Jiaju Lu2* and Jing-Hua Yang1,3*
1Cancer Research Center, Shandong University School of Medicine, Jinan, China 250012
2Departments of Urology and Pediatric Surgery, Shandong Provincial Hospital Qianfoshan Hospital, Shandong University, No. 324, Jingwu Road, Jinan 250021, China
3Departments of Surgery, Urology, Pathology and Proteomics Laboratory, Veterans Affairs Boston Healthcare System, Boston University School of Medicine, Boston, MA 02130
Table of Contents
Supplementary Table S1. Total Identified Proteins
Supplementary Table S2. ccRCC-Mediated Proteins
Supplementary Table S3. DAVID Analysis
Supplementary Table S4. Oxidoreductase (33 Proteins) in DAVID Analysis
Supplementary Table S5. STRING Categories
Supplementary Table S6. Oxidation-Reduction Process (37 Proteins) in STRING Categories
Supplementary Table S7. Quantification of Oxidized Residues in MNSOD

## Sheet: Supplementary Table S1
Supplementary Table S1. Total Identified Proteins
Accession	Protein Description	Spectral Counts of Adjacent Tissues					Spectral Counts of Tumor Tissues (ccRCC)					t-test
		Exp1	Exp2	Exp3	Average	SD	Exp1	Exp2	Exp3	Average	SD
A0M8Q6	Ig lambda-7 chain C region OS=Homo sapiens GN=IGLC7 PE=1 SV=2 - [LAC7_HUMAN]	0	0	0	0	0	65.5346	0	71.1778	45.5708	39.5662	0.0920991
A1IGU5	Rho guanine nucleotide exchange factor 37 OS=Homo sapiens GN=ARHGEF37 PE=2 SV=2 - [ARH37_HUMAN]	0	0	0	0	0	0	0	0.949037	0.316346	0.547927	0.211325
A1L4H1	Soluble scavenger receptor cysteine-rich domain-containing protein SSC5D OS=Homo sapiens GN=SSC5D PE=2 SV=3 - [SRCRL_HUMAN]	0	0	0	0	0	0.978129	0.967055	0.949037	0.96474	0.0146837	3.86052e-05
A2A2L5	Protein RTF2 homolog (Fragment) OS=Homo sapiens GN=RTFDC1 PE=2 SV=1 - [A2A2L5_HUMAN]	0	0	0	0	0	0	0	0.949037	0.316346	0.547927	0.211325
A2A341	Synaptonemal complex protein 2 (Fragment) OS=Homo sapiens GN=SYCP2 PE=2 SV=1 - [A2A341_HUMAN]	0	0	0	0	0	0	0	0.949037	0.316346	0.547927	0.211325
A2AB05	Mediator of DNA damage checkpoint protein 1 (Fragment) OS=Homo sapiens GN=MDC1 PE=2 SV=1 - [A2AB05_HUMAN]	0	0	0	0	0	0	0.967055	0	0.322352	0.55833	0.211325
A2ABF4	Valine--tRNA ligase (Fragment) OS=Homo sapiens GN=VARS PE=2 SV=1 - [A2ABF4_HUMAN]	0	0	0	0	0	0	0	1.89807	0.632691	1.09585	0.211325
A2IDD0	Nucleoside diphosphate kinase OS=Homo sapiens GN=NME4 PE=3 SV=1 - [A2IDD0_HUMAN]	0	0	0	0	0	0.978129	0	0.949037	0.642389	0.556515	0.0917982
A3KFI9	Cleavage stimulation factor subunit 1 (Fragment) OS=Homo sapiens GN=CSTF1 PE=2 SV=1 - [A3KFI9_HUMAN]	0	0	0	0	0	0	0.967055	0	0.322352	0.55833	0.211325
A4D1T9	Probable inactive serine protease 37 OS=Homo sapiens GN=PRSS37 PE=2 SV=1 - [PRS37_HUMAN]	0	0	0	0	0	0.978129	0	0	0.326043	0.564723	0.211325
A4D212	DKFZP586J0619 protein OS=Homo sapiens GN=DKFZP586J0619 PE=4 SV=1 - [A4D212_HUMAN]	0	0	0	0	0	0	0	0.949037	0.316346	0.547927	0.211325
A4D263	Uncharacterized protein C7orf72 OS=Homo sapiens GN=C7orf72 PE=4 SV=2 - [CG072_HUMAN]	0	0	0	0	0	0	0	0.949037	0.316346	0.547927	0.211325
A6NCI8	Uncharacterized protein C2orf78 OS=Homo sapiens GN=C2orf78 PE=2 SV=3 - [CB078_HUMAN]	0	0	0	0	0	0.978129	0	0	0.326043	0.564723	0.211325
A6NDJ8	Putative Rab-43-like protein ENSP00000330714 OS=Homo sapiens PE=5 SV=3 - [RB43L_HUMAN]	0	0	0	0	0	13.6938	0	0	4.5646	7.90612	0.211325
A6NDV3	Neuroblastoma breakpoint family member 10 OS=Homo sapiens GN=NBPF10 PE=2 SV=3 - [A6NDV3_HUMAN]	0	0	0	0	0	0	0.967055	0	0.322352	0.55833	0.211325
A6NF01	Putative nuclear envelope pore membrane protein POM 121B OS=Homo sapiens GN=POM121B PE=5 SV=2 - [P121B_HUMAN]	0	0	0	0	0	0	0	0.949037	0.316346	0.547927	0.211325
A6NG32	Charged multivesicular body protein 1a OS=Homo sapiens GN=CHMP1A PE=2 SV=3 - [A6NG32_HUMAN]	0	0	0	0	0	0.978129	0	0.949037	0.642389	0.556515	0.0917982
A6NGD5	Zinc finger and SCAN domain-containing protein 5C OS=Homo sapiens GN=ZSCAN5C PE=3 SV=1 - [ZSA5C_HUMAN]	0	0	0	0	0	0	0.967055	0	0.322352	0.55833	0.211325
A6NIA0	Mitogen-activated protein kinase kinase kinase 5 OS=Homo sapiens GN=MAP3K5 PE=2 SV=2 - [A6NIA0_HUMAN]	0	0	0	0	0	0	0	0.949037	0.316346	0.547927	0.211325
A6NIH7	Protein unc-119 homolog B OS=Homo sapiens GN=UNC119B PE=1 SV=1 - [U119B_HUMAN]	0	0	0	0	0	1.95626	0	0	0.652086	1.12945	0.211325
A6NJ11	Ubiquitin fusion degradation protein 1 homolog OS=Homo sapiens GN=UFD1L PE=2 SV=1 - [A6NJ11_HUMAN]	0	0	0	0	0	0	0	4.74518	1.58173	2.73963	0.211325
A6NJ16	Putative V-set and immunoglobulin domain-containing-like protein IGHV4OR15-8 OS=Homo sapiens GN=IGHV4OR15-8 PE=5 SV=2 - [IV4F8_HUMAN]	0	0	0	0	0	0	0.967055	0	0.322352	0.55833	0.211325
A6NJR5	Putative speedy protein-like protein 3 OS=Homo sapiens PE=5 SV=3 - [SPDL3_HUMAN]	0	0	0	0	0	0.978129	0.967055	0	0.648395	0.561554	0.0917583
A6NKE1	Trafficking protein particle complex subunit 3 OS=Homo sapiens GN=TRAPPC3 PE=2 SV=1 - [A6NKE1_HUMAN]	0	0	0	0	0	0	0	4.74518	1.58173	2.73963	0.211325
A6NKT7	RanBP2-like and GRIP domain-containing protein 3 OS=Homo sapiens GN=RGPD3 PE=2 SV=2 - [RGPD3_HUMAN]	0	0	0	0	0	0.978129	0.967055	0	0.648395	0.561554	0.0917583
A6NL68	Solute carrier family 2, facilitated glucose transporter member 1 OS=Homo sapiens GN=SLC2A1 PE=2 SV=1 - [A6NL68_HUMAN]	0	0	0	0	0	0.978129	0	0	0.326043	0.564723	0.211325
A6NML8	Diaphanous homolog 2 (Drosophila), isoform CRA_c OS=Homo sapiens GN=DIAPH2 PE=4 SV=3 - [A6NML8_HUMAN]	0	0	0	0	0	0	0	0.949037	0.316346	0.547927	0.211325
A6NMT0	Homeobox protein DBX1 OS=Homo sapiens GN=DBX1 PE=2 SV=2 - [DBX1_HUMAN]	0	0	0	0	0	0	0.967055	0	0.322352	0.55833	0.211325
A6NNP5-2	Isoform 2 of Coiled-coil domain-containing protein 169 OS=Homo sapiens GN=CCDC169 - [CC169_HUMAN]	0	0	0	0	0	0	0	0.949037	0.316346	0.547927	0.211325
A6PVN7	Serine/threonine-protein phosphatase 2A activator (Fragment) OS=Homo sapiens GN=PPP2R4 PE=2 SV=1 - [A6PVN7_HUMAN]	0	0	0	0	0	0	0	1.89807	0.632691	1.09585	0.211325
A6PVY9	Helix-loop-helix protein 2 (Fragment) OS=Homo sapiens GN=NHLH2 PE=2 SV=1 - [A6PVY9_HUMAN]	0	0	0	0	0	0.978129	0	0	0.326043	0.564723	0.211325
A8DCP3	Intersectin 1 short form variant 14 OS=Homo sapiens GN=ITSN1 PE=2 SV=1 - [A8DCP3_HUMAN]	0	0	0	0	0	1.95626	0	0	0.652086	1.12945	0.211325
A8K2U0	Alpha-2-macroglobulin-like protein 1 OS=Homo sapiens GN=A2ML1 PE=1 SV=3 - [A2ML1_HUMAN]	0	0	0	0	0	0	0.967055	0.949037	0.638697	0.553201	0.0917698
A8MU39	Serine/threonine-protein phosphatase OS=Homo sapiens GN=PPP5C PE=2 SV=1 - [A8MU39_HUMAN]	0	0	0	0	0	0	0	1.89807	0.632691	1.09585	0.211325
A8MXP8	Reticulocalbin-2 OS=Homo sapiens GN=RCN2 PE=2 SV=1 - [A8MXP8_HUMAN]	0	0	0	0	0	0	0.967055	0.949037	0.638697	0.553201	0.0917698
B0I1T2-3	Isoform 3 of Unconventional myosin-Ig OS=Homo sapiens GN=MYO1G - [MYO1G_HUMAN]	0	0	0	0	0	0.978129	0	0	0.326043	0.564723	0.211325
B0I1T2-4	Isoform 4 of Unconventional myosin-Ig OS=Homo sapiens GN=MYO1G - [MYO1G_HUMAN]	0	0	0	0	0	0	1.93411	0	0.644704	1.11666	0.211325
B0QXZ6	Chromobox protein homolog 6 OS=Homo sapiens GN=CBX6 PE=2 SV=1 - [B0QXZ6_HUMAN]	0	0	0	0	0	0	0.967055	0	0.322352	0.55833	0.211325
B0QYP2	Chromobox protein homolog 7 OS=Homo sapiens GN=CBX7 PE=2 SV=1 - [B0QYP2_HUMAN]	0	0	0	0	0	0	0	0.949037	0.316346	0.547927	0.211325
B0QZ77	MMS19 nucleotide excision repair protein homolog (Fragment) OS=Homo sapiens GN=MMS19 PE=2 SV=1 - [B0QZ77_HUMAN]	0	0	0	0	0	0.978129	0.967055	1.89807	1.28109	0.534356	0.0266959
B0S7Y8	HLA class II histocompatibility antigen, DQ beta 1 chain OS=Homo sapiens GN=HLA-DQB1 PE=2 SV=1 - [B0S7Y8_HUMAN]	0	0	0	0	0	14.6719	0	12.3375	9.00314	7.88383	0.0932681
B0S8I7	L antigen family member 3 OS=Homo sapiens GN=LAGE3 PE=2 SV=1 - [B0S8I7_HUMAN]	0	0	0	0	0	0.978129	0.967055	0.949037	0.96474	0.0146837	3.86052e-05
B0UX83	HLA-B associated transcript 3, isoform CRA_a OS=Homo sapiens GN=BAG6 PE=4 SV=1 - [B0UX83_HUMAN]	0	0	0	0	0	0.978129	0	0	0.326043	0.564723	0.211325
B0V0H5	C-domain 2 (Fragment) OS=Homo sapiens GN=TNF PE=2 SV=1 - [B0V0H5_HUMAN]	0	0	0	0	0	0	0.967055	0	0.322352	0.55833	0.211325
B1AH49	3-mercaptopyruvate sulfurtransferase OS=Homo sapiens GN=MPST PE=2 SV=1 - [B1AH49_HUMAN]	0	0	0	0	0	5.86877	0	0	1.95626	3.38834	0.211325
B1AJY6	26S proteasome non-ATPase regulatory subunit 10 OS=Homo sapiens GN=PSMD10 PE=2 SV=1 - [B1AJY6_HUMAN]	0	0	0	0	0	0.978129	0.967055	0	0.648395	0.561554	0.0917583
B1AK81	GPI-anchor transamidase OS=Homo sapiens GN=PIGK PE=4 SV=1 - [B1AK81_HUMAN]	0	0	0	0	0	0.978129	0	1.89807	0.958734	0.949185	0.111157
B1AL40	Zinc finger protein 248 (Fragment) OS=Homo sapiens GN=ZNF248 PE=2 SV=1 - [B1AL40_HUMAN]	0	0	0	0	0	0.978129	0	0	0.326043	0.564723	0.211325
B1AL79	Protein kinase N2, isoform CRA_b OS=Homo sapiens GN=PKN2 PE=4 SV=1 - [B1AL79_HUMAN]	0	0	0	0	0	0	0.967055	0	0.322352	0.55833	0.211325
B1ANE3	Methionine synthase (Fragment) OS=Homo sapiens GN=MTR PE=2 SV=1 - [B1ANE3_HUMAN]	0	0	0	0	0	0	0	0.949037	0.316346	0.547927	0.211325
B1ANH7	Putative uncharacterized protein C1orf148 OS=Homo sapiens GN=C1orf148 PE=5 SV=1 - [CA148_HUMAN]	0	0	0	0	0	0	0.967055	0	0.322352	0.55833	0.211325
B1APF6	cAMP-dependent protein kinase catalytic subunit beta (Fragment) OS=Homo sapiens GN=PRKACB PE=2 SV=1 - [B1APF6_HUMAN]	0	0	0	0	0	0	0	0.949037	0.316346	0.547927	0.211325
B1AQ20	Protein FAM151A OS=Homo sapiens GN=FAM151A PE=2 SV=1 - [B1AQ20_HUMAN]	0	0	0	0	0	0	0	1.89807	0.632691	1.09585	0.211325
B1B154	Calpain-8 OS=Homo sapiens GN=CAPN8 PE=2 SV=1 - [B1B154_HUMAN]	0	0	0	0	0	0	0	0.949037	0.316346	0.547927	0.211325
B2WTI3	Bifunctional arginine demethylase and lysyl-hydroxylase JMJD6 OS=Homo sapiens GN=JMJD6 PE=2 SV=1 - [B2WTI3_HUMAN]	0	0	0	0	0	0.978129	0	0	0.326043	0.564723	0.211325
B3KQF6	Vacuolar protein sorting 33B (Yeast), isoform CRA_b OS=Homo sapiens GN=VPS33B PE=2 SV=1 - [B3KQF6_HUMAN]	0	0	0	0	0	0	0	0.949037	0.316346	0.547927	0.211325
B3KRS5	Histone deacetylase OS=Homo sapiens GN=HDAC2 PE=2 SV=1 - [B3KRS5_HUMAN]	0	0	0	0	0	2.93439	2.90117	4.74518	3.52691	1.05518	0.0142821
B3KT86	Adenylate cyclase type 3 OS=Homo sapiens GN=ADCY3 PE=2 SV=1 - [B3KT86_HUMAN]	0	0	0	0	0	0	0.967055	0	0.322352	0.55833	0.211325
B3KTR6	Matrix-remodeling-associated protein 8 OS=Homo sapiens GN=MXRA8 PE=2 SV=1 - [B3KTR6_HUMAN]	0	0	0	0	0	0	0	0.949037	0.316346	0.547927	0.211325
B3KTY4	SLIT and NTRK-like family, member 2, isoform CRA_b (Fragment) OS=Homo sapiens GN=SLITRK2 PE=2 SV=1 - [B3KTY4_HUMAN]	0	0	0	0	0	0	0.967055	0	0.322352	0.55833	0.211325
B3KVK7	Methionine--tRNA ligase, cytoplasmic OS=Homo sapiens GN=MARS PE=2 SV=1 - [B3KVK7_HUMAN]	0	0	0	0	0	0	4.83528	0	1.61176	2.79165	0.211325
B3KVN2	Farnesyltransferase, CAAX box, alpha, isoform CRA_c OS=Homo sapiens GN=FNTA PE=2 SV=1 - [B3KVN2_HUMAN]	0	0	0	0	0	0.978129	2.90117	1.89807	1.92579	0.961818	0.037016
B3KYB6	Phosphatidylinositol transfer protein beta isoform (Fragment) OS=Homo sapiens GN=PITPNB PE=2 SV=1 - [B3KYB6_HUMAN]	0	0	0	0	0	1.95626	0	0	0.652086	1.12945	0.211325
B4DET3	Niemann-Pick C1 protein OS=Homo sapiens GN=NPC1 PE=2 SV=1 - [B4DET3_HUMAN]	0	0	0	0	0	0	0.967055	0	0.322352	0.55833	0.211325
B4DFG0	Protein DEK OS=Homo sapiens GN=DEK PE=2 SV=1 - [B4DFG0_HUMAN]	0	0	0	0	0	13.6938	19.3411	17.0827	16.7059	2.84244	0.00475624
B4DG80	LIM and cysteine-rich domains protein 1 OS=Homo sapiens GN=LMCD1 PE=2 SV=1 - [B4DG80_HUMAN]	0	0	0	0	0	0	0	11.3884	3.79615	6.57512	0.211325
B4DGB4	Plastin-3 OS=Homo sapiens GN=PLS3 PE=2 SV=1 - [B4DGB4_HUMAN]	0	0	0	0	0	46.9502	0	0	15.6501	27.1067	0.211325
B4DGW1	Inactive serine/threonine-protein kinase VRK3 OS=Homo sapiens GN=VRK3 PE=2 SV=1 - [B4DGW1_HUMAN]	0	0	0	0	0	0	0	0.949037	0.316346	0.547927	0.211325
B4DGX2	Phosphatidylinositol 5-phosphate 4-kinase type-2 alpha OS=Homo sapiens GN=PIP4K2A PE=2 SV=1 - [B4DGX2_HUMAN]	0	0	0	0	0	0	3.86822	0	1.28941	2.23332	0.211325
B4DH47	Nebulette OS=Homo sapiens GN=NEBL PE=2 SV=1 - [B4DH47_HUMAN]	0	0	0	0	0	1.95626	0	3.79615	1.91747	1.89837	0.111157
B4DHD4	Integrin beta OS=Homo sapiens GN=ITGB8 PE=2 SV=1 - [B4DHD4_HUMAN]	0	0	0	0	0	0	0	0.949037	0.316346	0.547927	0.211325
B4DJS2	Peroxisomal trans-2-enoyl-CoA reductase OS=Homo sapiens GN=PECR PE=2 SV=1 - [B4DJS2_HUMAN]	0	0	0	0	0	2.93439	0	2.84711	1.92717	1.66954	0.0917982
B4DJW3	Renalase OS=Homo sapiens GN=RNLS PE=2 SV=1 - [B4DJW3_HUMAN]	0	0	0	0	0	0.978129	0	0	0.326043	0.564723	0.211325
B4DK77	Optic atrophy 3 protein OS=Homo sapiens GN=OPA3 PE=2 SV=1 - [B4DK77_HUMAN]	0	0	0	0	0	0	0.967055	0	0.322352	0.55833	0.211325
B4DKJ3	Cartilage oligomeric matrix protein OS=Homo sapiens GN=COMP PE=2 SV=1 - [B4DKJ3_HUMAN]	0	0	0	0	0	0.978129	0	0	0.326043	0.564723	0.211325
B4DKR0	Syntaxin 5A, isoform CRA_c OS=Homo sapiens GN=STX5 PE=2 SV=1 - [B4DKR0_HUMAN]	0	0	0	0	0	2.93439	2.90117	1.89807	2.57788	0.58896	0.00847889
B4DL14	ATP synthase subunit gamma OS=Homo sapiens GN=ATP5C1 PE=2 SV=1 - [B4DL14_HUMAN]	0	0	0	0	0	24.4532	29.9787	27.5221	27.318	2.76839	0.00170287
B4DL79	Kinesin-like protein KIF20A OS=Homo sapiens GN=KIF20A PE=2 SV=1 - [B4DL79_HUMAN]	0	0	0	0	0	0.978129	0	0	0.326043	0.564723	0.211325
B4DLH2	Chromosome 2 open reading frame 18, isoform CRA_c OS=Homo sapiens GN=C2orf18 PE=2 SV=1 - [B4DLH2_HUMAN]	0	0	0	0	0	0	0	0.949037	0.316346	0.547927	0.211325
B4DLV2	DNA topoisomerase 2-beta OS=Homo sapiens GN=TOP2B PE=2 SV=1 - [B4DLV2_HUMAN]	0	0	0	0	0	0	0	0.949037	0.316346	0.547927	0.211325
B4DN45	S-adenosylmethionine synthase OS=Homo sapiens GN=MAT2A PE=2 SV=1 - [B4DN45_HUMAN]	0	0	0	0	0	0	0	8.54133	2.84711	4.93134	0.211325
B4DPS5	3'(2'),5'-bisphosphate nucleotidase 1 OS=Homo sapiens GN=BPNT1 PE=2 SV=1 - [B4DPS5_HUMAN]	0	0	0	0	0	1.95626	0	0	0.652086	1.12945	0.211325
B4DPX4	Chromaffin granule amine transporter OS=Homo sapiens GN=VAT1 PE=2 SV=1 - [B4DPX4_HUMAN]	0	0	0	0	0	0	32.8799	0	10.96	18.9832	0.211325
B4DQ94	SH3 domain-binding protein 5-like OS=Homo sapiens GN=SH3BP5L PE=2 SV=1 - [B4DQ94_HUMAN]	0	0	0	0	0	0	0.967055	0	0.322352	0.55833	0.211325
B4DSR5	Kinesin-like protein KIF3B OS=Homo sapiens GN=KIF3B PE=2 SV=1 - [B4DSR5_HUMAN]	0	0	0	0	0	0.978129	0	0	0.326043	0.564723	0.211325
B4DT23	Protein FAM98A OS=Homo sapiens GN=FAM98A PE=2 SV=1 - [B4DT23_HUMAN]	0	0	0	0	0	0	1.93411	0	0.644704	1.11666	0.211325
B4DT35	Nucleoporin p54 OS=Homo sapiens GN=NUP54 PE=2 SV=1 - [B4DT35_HUMAN]	0	0	0	0	0	0	0	2.84711	0.949037	1.64378	0.211325
B4DT58	Zinc finger protein ubi-d4 OS=Homo sapiens GN=DPF2 PE=2 SV=1 - [B4DT58_HUMAN]	0	0	0	0	0	1.95626	1.93411	1.89807	1.92948	0.0293673	3.86052e-05
B4DTE4	Tripartite motif-containing protein 62 OS=Homo sapiens GN=TRIM62 PE=2 SV=1 - [B4DTE4_HUMAN]	0	0	0	0	0	0	0.967055	0	0.322352	0.55833	0.211325
B4DTY9	Integrin beta OS=Homo sapiens GN=ITGB3 PE=2 SV=1 - [B4DTY9_HUMAN]	0	0	0	0	0	0	0	15.1846	5.06153	8.76683	0.211325
B4DW75	EGF-containing fibulin-like extracellular matrix protein 1 OS=Homo sapiens GN=EFEMP1 PE=2 SV=1 - [B4DW75_HUMAN]	0	0	0	0	0	1.95626	0.967055	1.89807	1.60713	0.555083	0.0187697
B4DWJ6	Ubiquitin carboxyl-terminal hydrolase 3 OS=Homo sapiens GN=USP3 PE=2 SV=1 - [B4DWJ6_HUMAN]	0	0	0	0	0	0	0.967055	0	0.322352	0.55833	0.211325
B4DWS2	Non-structural maintenance of chromosomes element 4 homolog A OS=Homo sapiens GN=NSMCE4A PE=2 SV=1 - [B4DWS2_HUMAN]	0	0	0	0	0	0	0.967055	0	0.322352	0.55833	0.211325
B4DXL7	WD repeat-containing protein 93 OS=Homo sapiens GN=WDR93 PE=2 SV=1 - [B4DXL7_HUMAN]	0	0	0	0	0	0	0	0.949037	0.316346	0.547927	0.211325
B4DY13	Nucleolar GTP-binding protein 1 OS=Homo sapiens GN=GTPBP4 PE=2 SV=1 - [B4DY13_HUMAN]	0	0	0	0	0	0.978129	0	0	0.326043	0.564723	0.211325
B4DZW6	Regulator of microtubule dynamics protein 1 OS=Homo sapiens GN=RMDN1 PE=2 SV=1 - [B4DZW6_HUMAN]	0	0	0	0	0	0	5.80233	0	1.93411	3.34998	0.211325
B4E0B6	Phosphatidylinositol 3,4,5-trisphosphate 3-phosphatase and dual-specificity protein phosphatase PTEN OS=Homo sapiens GN=TEP1 PE=2 SV=1 - [B4E0B6_HUMAN]	0	0	0	0	0	0.978129	0	0	0.326043	0.564723	0.211325
B4E0V0	Pyridoxine-5'-phosphate oxidase OS=Homo sapiens GN=PNPO PE=2 SV=1 - [B4E0V0_HUMAN]	0	0	0	0	0	0	0	2.84711	0.949037	1.64378	0.211325
B4E135	Leucine-rich repeats and immunoglobulin-like domains protein 1 OS=Homo sapiens GN=LIG1 PE=2 SV=1 - [B4E135_HUMAN]	0	0	0	0	0	0	0.967055	0	0.322352	0.55833	0.211325
B4E1B9	Transmembrane protein 2 OS=Homo sapiens GN=TMEM2 PE=2 SV=1 - [B4E1B9_HUMAN]	0	0	0	0	0	0	1.93411	0	0.644704	1.11666	0.211325
B4E1Z4	Complement factor B OS=Homo sapiens GN=CFB PE=2 SV=1 - [B4E1Z4_HUMAN]	0	0	0	0	0	21.5188	0	0	7.17295	12.4239	0.211325
B4E2C4	Breast carcinoma-amplified sequence 1 OS=Homo sapiens GN=BCAS1 PE=2 SV=1 - [B4E2C4_HUMAN]	0	0	0	0	0	0	0.967055	0	0.322352	0.55833	0.211325
B4E2J3	Serine protease 23 OS=Homo sapiens GN=PRSS23 PE=2 SV=1 - [B4E2J3_HUMAN]	0	0	0	0	0	0.978129	0.967055	0.949037	0.96474	0.0146837	3.86052e-05
B4E2Z0	SPARC-like protein 1 OS=Homo sapiens GN=SPARCL1 PE=2 SV=1 - [B4E2Z0_HUMAN]	0	0	0	0	0	6.8469	3.86822	0	3.57171	3.43307	0.106667
B4E3H6	Transforming acidic coiled-coil-containing protein 1 OS=Homo sapiens GN=TACC1 PE=2 SV=1 - [B4E3H6_HUMAN]	0	0	0	0	0	0.978129	0.967055	0	0.648395	0.561554	0.0917583
B4E3S0	Coronin OS=Homo sapiens GN=CORO1C PE=2 SV=1 - [B4E3S0_HUMAN]	0	0	0	0	0	1.95626	1.93411	0	1.29679	1.12311	0.0917583
B5MC98	Prolactin regulatory element-binding protein OS=Homo sapiens GN=PREB PE=2 SV=1 - [B5MC98_HUMAN]	0	0	0	0	0	0.978129	0.967055	0	0.648395	0.561554	0.0917583
B5MCD9	Rab GTPase-activating protein 1 (Fragment) OS=Homo sapiens GN=RABGAP1 PE=2 SV=1 - [B5MCD9_HUMAN]	0	0	0	0	0	0.978129	0	0	0.326043	0.564723	0.211325
B5MED8	VPS10 domain-containing receptor SorCS2 OS=Homo sapiens GN=SORCS2 PE=2 SV=3 - [B5MED8_HUMAN]	0	0	0	0	0	0.978129	0.967055	0	0.648395	0.561554	0.0917583
B6F210	Glutathione synthetase OS=Homo sapiens GN=GSS PE=2 SV=1 - [B6F210_HUMAN]	0	0	0	0	0	0	6.76939	0	2.25646	3.90831	0.211325
B7Z277	Septin-10 OS=Homo sapiens GN=SEPT10 PE=2 SV=1 - [B7Z277_HUMAN]	0	0	0	0	0	0	1.93411	0.949037	0.961049	0.967111	0.113678
B7Z2B4	Rab GTPase-activating protein 1 OS=Homo sapiens GN=RABGAP1 PE=2 SV=1 - [B7Z2B4_HUMAN]	0	0	0	0	0	0	0.967055	0	0.322352	0.55833	0.211325
B7Z2V9	Cytohesin-3 OS=Homo sapiens GN=CYTH3 PE=2 SV=1 - [B7Z2V9_HUMAN]	0	0	0	0	0	0	0.967055	0	0.322352	0.55833	0.211325
B7Z341	Protein NDRG3 OS=Homo sapiens GN=NDRG3 PE=2 SV=1 - [B7Z341_HUMAN]	0	0	0	0	0	0	0.967055	0.949037	0.638697	0.553201	0.0917698
B7Z3A6	Sorbitol dehydrogenase OS=Homo sapiens GN=SORD PE=4 SV=1 - [B7Z3A6_HUMAN]	0	0	0	0	0	0.978129	0	2.84711	1.27508	1.4466	0.133193
B7Z3P4	Dimethylaniline monooxygenase [N-oxide-forming] 1 OS=Homo sapiens GN=FMO1 PE=2 SV=1 - [B7Z3P4_HUMAN]	0	0	0	0	0	0	14.5058	17.0827	10.5295	9.20938	0.0931033
B7Z3X4	Glucosamine-6-phosphate isomerase 1 OS=Homo sapiens GN=GNPDA1 PE=2 SV=1 - [B7Z3X4_HUMAN]	0	0	0	0	0	0	1.93411	0	0.644704	1.11666	0.211325
B7Z3Z9	Long-chain-fatty-acid--CoA ligase 1 OS=Homo sapiens GN=ACSL1 PE=2 SV=1 - [B7Z3Z9_HUMAN]	0	0	0	0	0	0	6.76939	5.69422	4.15454	3.63787	0.0932623
B7Z413	Renin receptor OS=Homo sapiens GN=ATP6AP2 PE=2 SV=1 - [B7Z413_HUMAN]	0	0	0	0	0	0	3.86822	0	1.28941	2.23332	0.211325
B7Z4R5	P2X purinoceptor OS=Homo sapiens GN=P2RX4 PE=2 SV=1 - [B7Z4R5_HUMAN]	0	0	0	0	0	0.978129	0	0	0.326043	0.564723	0.211325
B7Z685	Guanylate cyclase 1, soluble, beta 3, isoform CRA_c OS=Homo sapiens GN=GUCY1B3 PE=2 SV=1 - [B7Z685_HUMAN]	0	0	0	0	0	0	0	0.949037	0.316346	0.547927	0.211325
B7Z6E8	SH3 domain-containing kinase-binding protein 1 OS=Homo sapiens GN=SH3KBP1 PE=2 SV=1 - [B7Z6E8_HUMAN]	0	0	0	0	0	0	0	0.949037	0.316346	0.547927	0.211325
B7Z770	RNA-binding protein Nova-1 OS=Homo sapiens GN=NOVA1 PE=2 SV=1 - [B7Z770_HUMAN]	0	0	0	0	0	0	0	0.949037	0.316346	0.547927	0.211325
B7Z7B0	Cleavage and polyadenylation-specificity factor subunit 4 OS=Homo sapiens GN=CPSF4 PE=2 SV=1 - [B7Z7B0_HUMAN]	0	0	0	0	0	0.978129	0	0.949037	0.642389	0.556515	0.0917982
B7Z7M6	Kinesin-like protein KIF2C OS=Homo sapiens GN=KIF2C PE=2 SV=1 - [B7Z7M6_HUMAN]	0	0	0	0	0	0.978129	0	0	0.326043	0.564723	0.211325
B7Z7N6	3-phosphoinositide-dependent protein kinase 1 OS=Homo sapiens GN=PDK1 PE=2 SV=1 - [B7Z7N6_HUMAN]	0	0	0	0	0	7.82503	6.76939	0	4.86481	4.24598	0.0928155
B7Z7X8	Atlastin-2 OS=Homo sapiens GN=ATL2 PE=2 SV=1 - [B7Z7X8_HUMAN]	0	0	0	0	0	0	0	1.89807	0.632691	1.09585	0.211325
B7Z7Z8	Peptidyl-prolyl cis-trans isomerase FKBP5 OS=Homo sapiens GN=FKBP5 PE=2 SV=1 - [B7Z7Z8_HUMAN]	0	0	0	0	0	1.95626	0	0	0.652086	1.12945	0.211325
B7Z807	FERM and PDZ domain-containing protein 1 OS=Homo sapiens GN=FRMPD1 PE=2 SV=1 - [B7Z807_HUMAN]	0	0	0	0	0	1.95626	0	0	0.652086	1.12945	0.211325
B7Z8R6	Alpha-1-microglobulin OS=Homo sapiens GN=AMBP PE=2 SV=1 - [B7Z8R6_HUMAN]	0	0	0	0	0	0	15.4729	19.9298	11.8009	10.46	0.0949488
B7Z9C4	CTP synthase 1 OS=Homo sapiens GN=CTPS1 PE=2 SV=1 - [B7Z9C4_HUMAN]	0	0	0	0	0	0	0.967055	0	0.322352	0.55833	0.211325
B7Z9L0	T-complex protein 1 subunit delta OS=Homo sapiens GN=CCT4 PE=2 SV=1 - [B7Z9L0_HUMAN]	0	0	0	0	0	0	34.814	0	11.6047	20.0999	0.211325
B7Z9S8	Sodium/potassium-transporting ATPase subunit beta-1 OS=Homo sapiens GN=ATP1B1 PE=2 SV=1 - [B7Z9S8_HUMAN]	0	0	0	0	0	26.4095	0	0	8.80316	15.2475	0.211325
B7ZAR1	T-complex protein 1 subunit epsilon OS=Homo sapiens GN=CCT5 PE=2 SV=1 - [B7ZAR1_HUMAN]	0	0	0	0	0	0	0	30.3692	10.1231	17.5337	0.211325
B7ZAZ9	Tripartite motif-containing protein 14 OS=Homo sapiens GN=TRIM14 PE=2 SV=1 - [B7ZAZ9_HUMAN]	0	0	0	0	0	0	0.967055	0	0.322352	0.55833	0.211325
B7ZB63	ADP-ribosylation factor 3 OS=Homo sapiens GN=ARF3 PE=2 SV=1 - [B7ZB63_HUMAN]	0	0	0	0	0	21.5188	0	22.7769	14.7652	12.8025	0.0919163
B7ZBQ1	Mediator of RNA polymerase II transcription subunit 20 (Fragment) OS=Homo sapiens GN=MED20 PE=2 SV=1 - [B7ZBQ1_HUMAN]	0	0	0	0	0	0	0.967055	0	0.322352	0.55833	0.211325
B7ZKM0	SART3 protein OS=Homo sapiens GN=SART3 PE=2 SV=1 - [B7ZKM0_HUMAN]	0	0	0	0	0	0	3.86822	0	1.28941	2.23332	0.211325
B7ZKW8	CapZ-interacting protein OS=Homo sapiens GN=RCSD1 PE=2 SV=1 - [B7ZKW8_HUMAN]	0	0	0	0	0	0	0.967055	0	0.322352	0.55833	0.211325
B7ZKY3	PDZ domain-containing protein 4 OS=Homo sapiens GN=PDZD4 PE=2 SV=1 - [B7ZKY3_HUMAN]	0	0	0	0	0	0.978129	0	0	0.326043	0.564723	0.211325
B7ZLZ2	ER degradation-enhancing alpha-mannosidase-like protein 3 OS=Homo sapiens GN=EDEM3 PE=2 SV=1 - [B7ZLZ2_HUMAN]	0	0	0	0	0	0.978129	0.967055	0	0.648395	0.561554	0.0917583
B7ZMI3	ITPR1 protein OS=Homo sapiens GN=ITPR1 PE=2 SV=1 - [B7ZMI3_HUMAN]	0	0	0	0	0	0	0.967055	0.949037	0.638697	0.553201	0.0917698
B8ZZ52	Uncharacterized protein OS=Homo sapiens PE=2 SV=1 - [B8ZZ52_HUMAN]	0	0	0	0	0	0	0.967055	0	0.322352	0.55833	0.211325
B8ZZF0	Protein phosphatase 1B (Fragment) OS=Homo sapiens GN=PPM1B PE=2 SV=2 - [B8ZZF0_HUMAN]	0	0	0	0	0	0	3.86822	3.79615	2.55479	2.21281	0.0917698
B8ZZJ1	Hyccin OS=Homo sapiens GN=FAM126A PE=4 SV=1 - [B8ZZJ1_HUMAN]	0	0	0	0	0	0	0	0.949037	0.316346	0.547927	0.211325
B8ZZS1	Uncharacterized protein OS=Homo sapiens PE=2 SV=1 - [B8ZZS1_HUMAN]	0	0	0	0	0	0.978129	0	0	0.326043	0.564723	0.211325
B8ZZZ5	PH and SEC7 domain-containing protein 4 (Fragment) OS=Homo sapiens GN=PSD4 PE=2 SV=1 - [B8ZZZ5_HUMAN]	0	0	0	0	0	0	0.967055	0	0.322352	0.55833	0.211325
B9A067	Mitochondrial inner membrane protein OS=Homo sapiens GN=IMMT PE=2 SV=2 - [B9A067_HUMAN]	0	0	0	0	0	69.4472	76.3974	67.3816	71.0754	4.72327	0.000734411
C6GKU9	Mediator of RNA polymerase II transcription subunit 30 OS=Homo sapiens GN=MED30S PE=2 SV=1 - [C6GKU9_HUMAN]	0	0	0	0	0	0	0	0.949037	0.316346	0.547927	0.211325
C9IYL4	General transcription factor IIE subunit 1 (Fragment) OS=Homo sapiens GN=GTF2E1 PE=2 SV=1 - [C9IYL4_HUMAN]	0	0	0	0	0	0	0.967055	0	0.322352	0.55833	0.211325
C9IYP1	Disks large homolog 1 (Fragment) OS=Homo sapiens GN=DLG1 PE=2 SV=1 - [C9IYP1_HUMAN]	0	0	0	0	0	0	0	3.79615	1.26538	2.19171	0.211325
C9IYX8	HCG2039851, isoform CRA_c OS=Homo sapiens GN=KALRN PE=4 SV=1 - [C9IYX8_HUMAN]	0	0	0	0	0	0.978129	0	0	0.326043	0.564723	0.211325
C9IZK7	WD repeat-containing protein 43 (Fragment) OS=Homo sapiens GN=WDR43 PE=2 SV=1 - [C9IZK7_HUMAN]	0	0	0	0	0	0	0.967055	0	0.322352	0.55833	0.211325
C9J0H3	Phospholipid scramblase 1 (Fragment) OS=Homo sapiens GN=PLSCR1 PE=2 SV=1 - [C9J0H3_HUMAN]	0	0	0	0	0	0	0.967055	0	0.322352	0.55833	0.211325
C9J0J3	Ectonucleoside triphosphate diphosphohydrolase 3 (Fragment) OS=Homo sapiens GN=ENTPD3 PE=2 SV=1 - [C9J0J3_HUMAN]	0	0	0	0	0	0	0.967055	0	0.322352	0.55833	0.211325
C9J185	Eukaryotic translation initiation factor 2-alpha kinase 3 (Fragment) OS=Homo sapiens GN=EIF2AK3 PE=2 SV=1 - [C9J185_HUMAN]	0	0	0	0	0	0	0	0.949037	0.316346	0.547927	0.211325
C9J1J2	Nucleoside diphosphate kinase 6 (Fragment) OS=Homo sapiens GN=NME6 PE=2 SV=1 - [C9J1J2_HUMAN]	0	0	0	0	0	0	0.967055	0.949037	0.638697	0.553201	0.0917698
C9J1K5	Sterol 26-hydroxylase, mitochondrial (Fragment) OS=Homo sapiens GN=CYP27A1 PE=2 SV=1 - [C9J1K5_HUMAN]	0	0	0	0	0	0.978129	0	0	0.326043	0.564723	0.211325
C9J299	Beta-adducin (Fragment) OS=Homo sapiens GN=ADD2 PE=2 SV=1 - [C9J299_HUMAN]	0	0	0	0	0	0	0	0.949037	0.316346	0.547927	0.211325
C9J2G3	3-oxoacyl-[acyl-carrier-protein] synthase, mitochondrial (Fragment) OS=Homo sapiens GN=OXSM PE=2 SV=1 - [C9J2G3_HUMAN]	0	0	0	0	0	1.95626	0	0	0.652086	1.12945	0.211325
C9J330	Nuclear receptor corepressor 2 (Fragment) OS=Homo sapiens GN=NCOR2 PE=2 SV=1 - [C9J330_HUMAN]	0	0	0	0	0	0.978129	0	0	0.326043	0.564723	0.211325
C9J3J1	Threonine synthase-like 2 (Fragment) OS=Homo sapiens GN=THNSL2 PE=2 SV=1 - [C9J3J1_HUMAN]	0	0	0	0	0	0	0.967055	0	0.322352	0.55833	0.211325
C9J5S0	N-acetyllactosamine synthase (Fragment) OS=Homo sapiens GN=B4GALT4 PE=2 SV=1 - [C9J5S0_HUMAN]	0	0	0	0	0	0	0.967055	0	0.322352	0.55833	0.211325
C9J6C5	MKI67 FHA domain-interacting nucleolar phosphoprotein (Fragment) OS=Homo sapiens GN=MKI67IP PE=2 SV=1 - [C9J6C5_HUMAN]	0	0	0	0	0	0	2.90117	0	0.967055	1.67499	0.211325
C9J7P5	Protein TBRG4 (Fragment) OS=Homo sapiens GN=TBRG4 PE=2 SV=1 - [C9J7P5_HUMAN]	0	0	0	0	0	0	0.967055	0	0.322352	0.55833	0.211325
C9J8Q5	Succinate-semialdehyde dehydrogenase, mitochondrial OS=Homo sapiens GN=ALDH5A1 PE=2 SV=1 - [C9J8Q5_HUMAN]	0	0	0	0	0	1.95626	2.90117	4.74518	3.20087	1.41841	0.0298292
C9J8U1	Cytospin-A (Fragment) OS=Homo sapiens GN=SPECC1L PE=2 SV=1 - [C9J8U1_HUMAN]	0	0	0	0	0	0.978129	0.967055	0.949037	0.96474	0.0146837	3.86052e-05
C9J8U2	Nicotinate phosphoribosyltransferase OS=Homo sapiens GN=NAPRT1 PE=4 SV=1 - [C9J8U2_HUMAN]	0	0	0	0	0	2.93439	0	0	0.978129	1.69417	0.211325
C9J932	Programmed cell death protein 10 (Fragment) OS=Homo sapiens GN=PDCD10 PE=2 SV=1 - [C9J932_HUMAN]	0	0	0	0	0	0	0.967055	0	0.322352	0.55833	0.211325
C9J9J4	55 kDa erythrocyte membrane protein (Fragment) OS=Homo sapiens GN=MPP1 PE=2 SV=1 - [C9J9J4_HUMAN]	0	0	0	0	0	0	0	1.89807	0.632691	1.09585	0.211325
C9J9N4	Transcriptional activator GLI3 (Fragment) OS=Homo sapiens GN=GLI3 PE=2 SV=1 - [C9J9N4_HUMAN]	0	0	0	0	0	0	0	0.949037	0.316346	0.547927	0.211325
C9J9P7	RNA-binding protein 5 (Fragment) OS=Homo sapiens GN=RBM5 PE=2 SV=1 - [C9J9P7_HUMAN]	0	0	0	0	0	0	0	0.949037	0.316346	0.547927	0.211325
C9J9X2	Kinesin-like protein KIF3A (Fragment) OS=Homo sapiens GN=KIF3A PE=2 SV=1 - [C9J9X2_HUMAN]	0	0	0	0	0	0.978129	0	0	0.326043	0.564723	0.211325
C9JA93	TBC1 domain family member 15 (Fragment) OS=Homo sapiens GN=TBC1D15 PE=2 SV=1 - [C9JA93_HUMAN]	0	0	0	0	0	0.978129	0	0	0.326043	0.564723	0.211325
C9JAL0	Quinone oxidoreductase-like protein 1 (Fragment) OS=Homo sapiens GN=CRYZL1 PE=2 SV=1 - [C9JAL0_HUMAN]	0	0	0	0	0	1.95626	0	1.89807	1.28478	1.11303	0.0917982
C9JAM8	Plastin-1 (Fragment) OS=Homo sapiens GN=PLS1 PE=2 SV=1 - [C9JAM8_HUMAN]	0	0	0	0	0	11.7375	0	0	3.91252	6.77668	0.211325
C9JC71	Low affinity immunoglobulin gamma Fc region receptor III-A (Fragment) OS=Homo sapiens GN=FCGR3A PE=2 SV=1 - [C9JC71_HUMAN]	0	0	0	0	0	0.978129	0	0	0.326043	0.564723	0.211325
C9JDE9	3-ketoacyl-CoA thiolase, peroxisomal OS=Homo sapiens GN=ACAA1 PE=2 SV=1 - [C9JDE9_HUMAN]	0	0	0	0	0	0	0	19.9298	6.64326	11.5065	0.211325
C9JDI3	Troponin C, slow skeletal and cardiac muscles (Fragment) OS=Homo sapiens GN=TNNC1 PE=2 SV=1 - [C9JDI3_HUMAN]	0	0	0	0	0	0	0.967055	0.949037	0.638697	0.553201	0.0917698
C9JEL7	NADH dehydrogenase [ubiquinone] complex I, assembly factor 7 (Fragment) OS=Homo sapiens GN=NDUFAF7 PE=2 SV=1 - [C9JEL7_HUMAN]	0	0	0	0	0	0.978129	0	0	0.326043	0.564723	0.211325
C9JES6	Calcium/calmodulin-dependent protein kinase type 1 (Fragment) OS=Homo sapiens GN=CAMK1 PE=2 SV=1 - [C9JES6_HUMAN]	0	0	0	0	0	0.978129	0	0	0.326043	0.564723	0.211325
C9JF29	Leukocyte immunoglobulin-like receptor subfamily B member 2 OS=Homo sapiens GN=LILRB2 PE=4 SV=1 - [C9JF29_HUMAN]	0	0	0	0	0	0	1.93411	0	0.644704	1.11666	0.211325
C9JF62	NEDD8-conjugating enzyme UBE2F (Fragment) OS=Homo sapiens GN=UBE2F PE=2 SV=1 - [C9JF62_HUMAN]	0	0	0	0	0	0	0	0.949037	0.316346	0.547927	0.211325
C9JFF1	Seizure protein 6 homolog OS=Homo sapiens GN=SEZ6 PE=2 SV=1 - [C9JFF1_HUMAN]	0	0	0	0	0	0.978129	0	0	0.326043	0.564723	0.211325
C9JFQ0	Leukocyte-associated immunoglobulin-like receptor 2 (Fragment) OS=Homo sapiens GN=LAIR2 PE=2 SV=1 - [C9JFQ0_HUMAN]	0	0	0	0	0	0	1.93411	0	0.644704	1.11666	0.211325
C9JG32	Elongation factor Ts (Fragment) OS=Homo sapiens GN=TSFM PE=2 SV=1 - [C9JG32_HUMAN]	0	0	0	0	0	0	3.86822	0	1.28941	2.23332	0.211325
C9JGH7	Origin recognition complex subunit 4 (Fragment) OS=Homo sapiens GN=ORC4 PE=2 SV=1 - [C9JGH7_HUMAN]	0	0	0	0	0	0	0	0.949037	0.316346	0.547927	0.211325
C9JGM0	Fumarylacetoacetate hydrolase domain-containing protein 2A (Fragment) OS=Homo sapiens GN=FAHD2A PE=2 SV=1 - [C9JGM0_HUMAN]	0	0	0	0	0	0	0	0.949037	0.316346	0.547927	0.211325
C9JHJ5	Golgin subfamily A member 4 (Fragment) OS=Homo sapiens GN=GOLGA4 PE=2 SV=1 - [C9JHJ5_HUMAN]	0	0	0	0	0	0.978129	0	1.89807	0.958734	0.949185	0.111157
C9JI91	E3 ubiquitin-protein ligase TRIM56 (Fragment) OS=Homo sapiens GN=TRIM56 PE=2 SV=1 - [C9JI91_HUMAN]	0	0	0	0	0	0.978129	0	0	0.326043	0.564723	0.211325
C9JIE4	Synemin OS=Homo sapiens GN=SYNM PE=2 SV=1 - [C9JIE4_HUMAN]	0	0	0	0	0	0	1.93411	0	0.644704	1.11666	0.211325
C9JIG9	Serine/threonine-protein kinase OSR1 OS=Homo sapiens GN=OXSR1 PE=2 SV=1 - [C9JIG9_HUMAN]	0	0	0	0	0	2.93439	0	0	0.978129	1.69417	0.211325
C9JIM0	MAWD binding protein, isoform CRA_a OS=Homo sapiens GN=PBLD PE=4 SV=1 - [C9JIM0_HUMAN]	0	0	0	0	0	0	0	20.8788	6.9596	12.0544	0.211325
C9JIV3	E3 ubiquitin-protein ligase RNF216 (Fragment) OS=Homo sapiens GN=RNF216 PE=2 SV=1 - [C9JIV3_HUMAN]	0	0	0	0	0	0	0	0.949037	0.316346	0.547927	0.211325
C9JJ34	Ran-specific GTPase-activating protein (Fragment) OS=Homo sapiens GN=RANBP1 PE=2 SV=1 - [C9JJ34_HUMAN]	0	0	0	0	0	2.93439	0	0	0.978129	1.69417	0.211325
C9JKD7	Galactosylceramide sulfotransferase (Fragment) OS=Homo sapiens GN=GAL3ST1 PE=2 SV=1 - [C9JKD7_HUMAN]	0	0	0	0	0	0.978129	0.967055	0.949037	0.96474	0.0146837	3.86052e-05
C9JKX0	Meiosis arrest female protein 1 OS=Homo sapiens GN=KIAA0430 PE=2 SV=1 - [C9JKX0_HUMAN]	0	0	0	0	0	0.978129	0	0	0.326043	0.564723	0.211325
C9JLA8	Rho GTPase-activating protein 4 (Fragment) OS=Homo sapiens GN=ARHGAP4 PE=2 SV=1 - [C9JLA8_HUMAN]	0	0	0	0	0	0	0.967055	0.949037	0.638697	0.553201	0.0917698
C9JLF4	Exonuclease 3'-5' domain-containing protein 2 (Fragment) OS=Homo sapiens GN=EXD2 PE=2 SV=1 - [C9JLF4_HUMAN]	0	0	0	0	0	0	0	0.949037	0.316346	0.547927	0.211325
C9JLJ1	F-box-like/WD repeat-containing protein TBL1XR1 (Fragment) OS=Homo sapiens GN=TBL1XR1 PE=2 SV=1 - [C9JLJ1_HUMAN]	0	0	0	0	0	0.978129	0	0	0.326043	0.564723	0.211325
C9JLM5	Serpin B5 (Fragment) OS=Homo sapiens GN=SERPINB5 PE=2 SV=1 - [C9JLM5_HUMAN]	0	0	0	0	0	0.978129	0	0.949037	0.642389	0.556515	0.0917982
C9JLX3	Adenylate cyclase type 3 (Fragment) OS=Homo sapiens GN=ADCY3 PE=2 SV=1 - [C9JLX3_HUMAN]	0	0	0	0	0	0	0.967055	0	0.322352	0.55833	0.211325
C9JNC3	Butyrophilin subfamily 2 member A1 (Fragment) OS=Homo sapiens GN=BTN2A1 PE=2 SV=1 - [C9JNC3_HUMAN]	0	0	0	0	0	0	0.967055	0	0.322352	0.55833	0.211325
C9JP16	Cartilage-associated protein OS=Homo sapiens GN=CRTAP PE=2 SV=1 - [C9JP16_HUMAN]	0	0	0	0	0	0	0	0.949037	0.316346	0.547927	0.211325
C9JQE8	Nuclear receptor corepressor 2 (Fragment) OS=Homo sapiens GN=NCOR2 PE=1 SV=1 - [C9JQE8_HUMAN]	0	0	0	0	0	0	0	0.949037	0.316346	0.547927	0.211325
C9JQX9	Nuclear cap-binding protein subunit 2 (Fragment) OS=Homo sapiens GN=NCBP2 PE=2 SV=1 - [C9JQX9_HUMAN]	0	0	0	0	0	0	0.967055	0	0.322352	0.55833	0.211325
C9JSC0	POU domain, class 6, transcription factor 2 (Fragment) OS=Homo sapiens GN=POU6F2 PE=2 SV=1 - [C9JSC0_HUMAN]	0	0	0	0	0	0	0	0.949037	0.316346	0.547927	0.211325
C9JSL4	Prolyl 3-hydroxylase 2 (Fragment) OS=Homo sapiens GN=LEPREL1 PE=2 SV=1 - [C9JSL4_HUMAN]	0	0	0	0	0	1.95626	0.967055	0	0.974438	0.97815	0.113292
C9JTJ8	Serpin B8 (Fragment) OS=Homo sapiens GN=SERPINB8 PE=2 SV=1 - [C9JTJ8_HUMAN]	0	0	0	0	0	0	0	0.949037	0.316346	0.547927	0.211325
C9JUG3	Protein phosphatase Slingshot homolog 3 OS=Homo sapiens GN=SSH3 PE=4 SV=1 - [C9JUG3_HUMAN]	0	0	0	0	0	0.978129	0	0.949037	0.642389	0.556515	0.0917982
C9JUK7	Leukosialin (Fragment) OS=Homo sapiens GN=SPN PE=2 SV=1 - [C9JUK7_HUMAN]	0	0	0	0	0	0.978129	0.967055	0	0.648395	0.561554	0.0917583
C9JVA8	Serpin B8 (Fragment) OS=Homo sapiens GN=SERPINB8 PE=2 SV=1 - [C9JVA8_HUMAN]	0	0	0	0	0	1.95626	0	0	0.652086	1.12945	0.211325
C9JVN1	Melanotransferrin (Fragment) OS=Homo sapiens GN=MFI2 PE=2 SV=1 - [C9JVN1_HUMAN]	0	0	0	0	0	0	0	0.949037	0.316346	0.547927	0.211325
C9JWQ9	Raftlin (Fragment) OS=Homo sapiens GN=RFTN1 PE=2 SV=1 - [C9JWQ9_HUMAN]	0	0	0	0	0	0	0.967055	0	0.322352	0.55833	0.211325
C9JX83	U3 small nucleolar ribonucleoprotein protein MPP10 OS=Homo sapiens GN=MPHOSPH10 PE=2 SV=1 - [C9JX83_HUMAN]	0	0	0	0	0	0	0	0.949037	0.316346	0.547927	0.211325
C9JXG8	Ran-specific GTPase-activating protein (Fragment) OS=Homo sapiens GN=RANBP1 PE=2 SV=2 - [C9JXG8_HUMAN]	0	0	0	0	0	0	2.90117	0	0.967055	1.67499	0.211325
C9JXT5	Kinesin light chain 4 (Fragment) OS=Homo sapiens GN=KLC4 PE=2 SV=1 - [C9JXT5_HUMAN]	0	0	0	0	0	0	0	0.949037	0.316346	0.547927	0.211325
C9JXX4	Insulin-like growth factor-binding protein 5 (Fragment) OS=Homo sapiens GN=IGFBP5 PE=2 SV=1 - [C9JXX4_HUMAN]	0	0	0	0	0	0	0.967055	0.949037	0.638697	0.553201	0.0917698
C9JXZ7	Replication factor C subunit 4 (Fragment) OS=Homo sapiens GN=RFC4 PE=2 SV=1 - [C9JXZ7_HUMAN]	0	0	0	0	0	0	0	1.89807	0.632691	1.09585	0.211325
C9JYW1	Unconventional myosin-Ib (Fragment) OS=Homo sapiens GN=MYO1B PE=2 SV=1 - [C9JYW1_HUMAN]	0	0	0	0	0	1.95626	0.967055	0.949037	1.29078	0.576388	0.0302488
C9JZ85	NF-kappa-B essential modulator (Fragment) OS=Homo sapiens GN=IKBKG PE=2 SV=1 - [C9JZ85_HUMAN]	0	0	0	0	0	0	0.967055	0.949037	0.638697	0.553201	0.0917698
C9JZW7	[Protein ADP-ribosylarginine] hydrolase (Fragment) OS=Homo sapiens GN=ADPRH PE=2 SV=1 - [C9JZW7_HUMAN]	0	0	0	0	0	0.978129	0.967055	0.949037	0.96474	0.0146837	3.86052e-05
C9K098	Cytoplasmic protein NCK1 (Fragment) OS=Homo sapiens GN=NCK1 PE=2 SV=1 - [C9K098_HUMAN]	0	0	0	0	0	2.93439	0	0	0.978129	1.69417	0.211325
D3DNV8	Leprecan-like 1, isoform CRA_b OS=Homo sapiens GN=LEPREL1 PE=4 SV=1 - [D3DNV8_HUMAN]	0	0	0	0	0	0	0	1.89807	0.632691	1.09585	0.211325
D6R9A7	Cancer-associated gene 1 protein OS=Homo sapiens GN=CAGE1 PE=2 SV=1 - [D6R9A7_HUMAN]	0	0	0	0	0	0	0.967055	0	0.322352	0.55833	0.211325
D6R9A8	Catenin delta-2 OS=Homo sapiens GN=CTNND2 PE=2 SV=2 - [D6R9A8_HUMAN]	0	0	0	0	0	0	2.90117	0	0.967055	1.67499	0.211325
D6R9E2	Probable G-protein-coupled receptor 111 OS=Homo sapiens GN=GPR111 PE=2 SV=1 - [D6R9E2_HUMAN]	0	0	0	0	0	0.978129	0	0	0.326043	0.564723	0.211325
D6R9J1	TSC22 domain family protein 3 (Fragment) OS=Homo sapiens GN=TSC22D3 PE=2 SV=1 - [D6R9J1_HUMAN]	0	0	0	0	0	0.978129	0	0	0.326043	0.564723	0.211325
D6R9N2	Protein FAM86C1 OS=Homo sapiens GN=FAM86C1 PE=4 SV=1 - [D6R9N2_HUMAN]	0	0	0	0	0	0	0	0.949037	0.316346	0.547927	0.211325
D6R9S9	N-acylethanolamine-hydrolyzing acid amidase OS=Homo sapiens GN=NAAA PE=2 SV=1 - [D6R9S9_HUMAN]	0	0	0	0	0	0	1.93411	0	0.644704	1.11666	0.211325
D6RA96	Protein RTEL1-TNFRSF6B OS=Homo sapiens GN=RTEL1-TNFRSF6B PE=2 SV=1 - [D6RA96_HUMAN]	0	0	0	0	0	0.978129	0	0	0.326043	0.564723	0.211325
D6RAC5	Single-stranded DNA-binding protein 2 (Fragment) OS=Homo sapiens GN=SSBP2 PE=2 SV=2 - [D6RAC5_HUMAN]	0	0	0	0	0	0.978129	0	0	0.326043	0.564723	0.211325
D6RAF8	Heterogeneous nuclear ribonucleoprotein D0 (Fragment) OS=Homo sapiens GN=HNRNPD PE=2 SV=1 - [D6RAF8_HUMAN]	0	0	0	0	0	42.0595	0	40.8086	27.6227	23.9301	0.0917982
D6RAI0	UPF0361 protein C3orf37 (Fragment) OS=Homo sapiens GN=C3orf37 PE=2 SV=1 - [D6RAI0_HUMAN]	0	0	0	0	0	0	0.967055	0	0.322352	0.55833	0.211325
D6RAI6	Filamin-binding LIM protein 1 (Fragment) OS=Homo sapiens GN=FBLIM1 PE=2 SV=1 - [D6RAI6_HUMAN]	0	0	0	0	0	0.978129	0	0.949037	0.642389	0.556515	0.0917982
D6RAK9	Protein VPRBP (Fragment) OS=Homo sapiens GN=VPRBP PE=2 SV=1 - [D6RAK9_HUMAN]	0	0	0	0	0	0	0.967055	0	0.322352	0.55833	0.211325
D6RB52	Uncharacterized protein OS=Homo sapiens PE=2 SV=1 - [D6RB52_HUMAN]	0	0	0	0	0	0.978129	0.967055	0	0.648395	0.561554	0.0917583
D6RBD5	Alpha-L-iduronidase (Fragment) OS=Homo sapiens GN=IDUA PE=2 SV=1 - [D6RBD5_HUMAN]	0	0	0	0	0	0.978129	0	0.949037	0.642389	0.556515	0.0917982
D6RBH9	Mothers against decapentaplegic homolog 1 (Fragment) OS=Homo sapiens GN=SMAD1 PE=2 SV=1 - [D6RBH9_HUMAN]	0	0	0	0	0	0	0.967055	0	0.322352	0.55833	0.211325
D6RBU5	Neurofascin OS=Homo sapiens GN=NFASC PE=2 SV=1 - [D6RBU5_HUMAN]	0	0	0	0	0	0	0	0.949037	0.316346	0.547927	0.211325
D6RBW0	Centromere-associated protein E (Fragment) OS=Homo sapiens GN=CENPE PE=2 SV=1 - [D6RBW0_HUMAN]	0	0	0	0	0	0.978129	1.93411	0	0.970747	0.967076	0.112116
D6RC04	COMM domain-containing protein 10 OS=Homo sapiens GN=COMMD10 PE=2 SV=1 - [D6RC04_HUMAN]	0	0	0	0	0	3.91252	3.86822	2.84711	3.54262	0.602733	0.00475575
D6RC31	Translation machinery-associated protein 16 OS=Homo sapiens GN=TMA16 PE=2 SV=1 - [D6RC31_HUMAN]	0	0	0	0	0	0	0.967055	0	0.322352	0.55833	0.211325
D6RC52	H/ACA ribonucleoprotein complex subunit 2 (Fragment) OS=Homo sapiens GN=NHP2 PE=2 SV=1 - [D6RC52_HUMAN]	0	0	0	0	0	0	0	1.89807	0.632691	1.09585	0.211325
D6RD39	GPI ethanolamine phosphate transferase 2 OS=Homo sapiens GN=PIGG PE=2 SV=1 - [D6RD39_HUMAN]	0	0	0	0	0	0	0.967055	0	0.322352	0.55833	0.211325
D6RD73	Methyltransferase-like protein 14 (Fragment) OS=Homo sapiens GN=METTL14 PE=2 SV=1 - [D6RD73_HUMAN]	0	0	0	0	0	0	0.967055	0	0.322352	0.55833	0.211325
D6RDH4	Transcription initiation factor TFIID subunit 9 OS=Homo sapiens GN=TAF9 PE=2 SV=1 - [D6RDH4_HUMAN]	0	0	0	0	0	0	0	0.949037	0.316346	0.547927	0.211325
D6RDM7	Ubiquitin-conjugating enzyme E2 K (Fragment) OS=Homo sapiens GN=UBE2K PE=2 SV=1 - [D6RDM7_HUMAN]	0	0	0	0	0	2.93439	0	0	0.978129	1.69417	0.211325
D6RDN4	Coiled-coil domain-containing protein 110 (Fragment) OS=Homo sapiens GN=CCDC110 PE=2 SV=1 - [D6RDN4_HUMAN]	0	0	0	0	0	1.95626	0	0	0.652086	1.12945	0.211325
D6RE80	Macrophage erythroblast attacher (Fragment) OS=Homo sapiens GN=MAEA PE=2 SV=1 - [D6RE80_HUMAN]	0	0	0	0	0	0	0.967055	0	0.322352	0.55833	0.211325
D6RE82	60S acidic ribosomal protein P1 OS=Homo sapiens GN=RRP1 PE=2 SV=1 - [D6RE82_HUMAN]	0	0	0	0	0	0	0.967055	0	0.322352	0.55833	0.211325
D6REL4	Protein Red (Fragment) OS=Homo sapiens GN=IK PE=2 SV=1 - [D6REL4_HUMAN]	0	0	0	0	0	1.95626	0	0	0.652086	1.12945	0.211325
D6REX5	Selenoprotein P (Fragment) OS=Homo sapiens GN=SEPP1 PE=4 SV=1 - [D6REX5_HUMAN]	0	0	0	0	0	0	0.967055	0	0.322352	0.55833	0.211325
D6RF54	Inactive ubiquitin carboxyl-terminal hydrolase 53 OS=Homo sapiens GN=USP53 PE=2 SV=1 - [D6RF54_HUMAN]	0	0	0	0	0	0	0	0.949037	0.316346	0.547927	0.211325
D6RFI2	EF-hand calcium-binding domain-containing protein 12 (Fragment) OS=Homo sapiens GN=EFCAB12 PE=2 SV=1 - [D6RFI2_HUMAN]	0	0	0	0	0	0.978129	0	0	0.326043	0.564723	0.211325
D6RFM5	Succinate dehydrogenase [ubiquinone] flavoprotein subunit, mitochondrial OS=Homo sapiens GN=SDHA PE=2 SV=1 - [D6RFM5_HUMAN]	0	0	0	0	0	0	25.1434	0	8.38115	14.5166	0.211325
D6RGC4	E3 ubiquitin-protein ligase MARCH1 OS=Homo sapiens GN=MARCH1 PE=2 SV=1 - [D6RGC4_HUMAN]	0	0	0	0	0	0.978129	0	0	0.326043	0.564723	0.211325
D6RID6	Macrophage erythroblast attacher (Fragment) OS=Homo sapiens GN=MAEA PE=2 SV=1 - [D6RID6_HUMAN]	0	0	0	0	0	0.978129	0	0	0.326043	0.564723	0.211325
D6RIS5	Putative L-type amino acid transporter 1-like protein IMAA OS=Homo sapiens GN=MMAA PE=2 SV=1 - [D6RIS5_HUMAN]	0	0	0	0	0	0.978129	0.967055	0	0.648395	0.561554	0.0917583
D6RJA0	Histone-lysine N-methyltransferase SETD7 OS=Homo sapiens GN=SETD7 PE=2 SV=1 - [D6RJA0_HUMAN]	0	0	0	0	0	1.95626	0	0	0.652086	1.12945	0.211325
D6RJA7	Myocyte-specific enhancer factor 2C (Fragment) OS=Homo sapiens GN=MEF2C PE=2 SV=1 - [D6RJA7_HUMAN]	0	0	0	0	0	0	0	1.89807	0.632691	1.09585	0.211325
D7R525	Mitogen-activated protein kinase 9 OS=Homo sapiens GN=MAPK9 PE=2 SV=1 - [D7R525_HUMAN]	0	0	0	0	0	0	1.93411	0	0.644704	1.11666	0.211325
D9IX66	Platelet glycoprotein 4 OS=Homo sapiens GN=CD36 PE=2 SV=1 - [D9IX66_HUMAN]	0	0	0	0	0	0	0	2.84711	0.949037	1.64378	0.211325
E5RFJ0	Dedicator of cytokinesis protein 2 OS=Homo sapiens GN=DOCK2 PE=2 SV=1 - [E5RFJ0_HUMAN]	0	0	0	0	0	0	0	0.949037	0.316346	0.547927	0.211325
E5RFQ4	Protein tyrosine phosphatase type IVA 3 OS=Homo sapiens GN=PTP4A3 PE=2 SV=1 - [E5RFQ4_HUMAN]	0	0	0	0	0	0.978129	0	0	0.326043	0.564723	0.211325
E5RFU2	Lipid-phosphate phosphatase OS=Homo sapiens GN=EPHX2 PE=2 SV=1 - [E5RFU2_HUMAN]	0	0	0	0	0	9.78129	0	7.59229	5.79119	5.13336	0.0949541
E5RG02	Putative serine protease 46 OS=Homo sapiens GN=PRSS46 PE=5 SV=1 - [PRS46_HUMAN]	0	0	0	0	0	0	0	0.949037	0.316346	0.547927	0.211325
E5RGA2	Eukaryotic translation initiation factor 3 subunit E OS=Homo sapiens GN=EIF3E PE=2 SV=1 - [E5RGA2_HUMAN]	0	0	0	0	0	0	10.6376	0	3.54587	6.14163	0.211325
E5RGG7	Protein-L-isoaspartate O-methyltransferase domain-containing protein 1 OS=Homo sapiens GN=PCMTD1 PE=2 SV=1 - [E5RGG7_HUMAN]	0	0	0	0	0	0	0	0.949037	0.316346	0.547927	0.211325
E5RGH8	Proton-coupled amino acid transporter 2 OS=Homo sapiens GN=SLC36A2 PE=4 SV=1 - [E5RGH8_HUMAN]	0	0	0	0	0	0.978129	0.967055	0.949037	0.96474	0.0146837	3.86052e-05
E5RGS7	Uncharacterized protein OS=Homo sapiens PE=2 SV=1 - [E5RGS7_HUMAN]	0	0	0	0	0	3.91252	0	2.84711	2.25321	2.02274	0.09673
E5RGW5	Inhibitor of nuclear factor kappa-B kinase subunit beta OS=Homo sapiens GN=IKBKB PE=2 SV=1 - [E5RGW5_HUMAN]	0	0	0	0	0	0	0	0.949037	0.316346	0.547927	0.211325
E5RHT6	ADP-ribosylation factor GTPase-activating protein 1 (Fragment) OS=Homo sapiens GN=ARFGAP1 PE=2 SV=2 - [E5RHT6_HUMAN]	0	0	0	0	0	0	0.967055	0	0.322352	0.55833	0.211325
E5RHU4	Bridging integrator 3 OS=Homo sapiens GN=BIN3 PE=2 SV=1 - [E5RHU4_HUMAN]	0	0	0	0	0	0.978129	0	0	0.326043	0.564723	0.211325
E5RI09	Beta-enolase (Fragment) OS=Homo sapiens GN=ENO3 PE=4 SV=1 - [E5RI09_HUMAN]	0	0	0	0	0	0	19.3411	0	6.44704	11.1666	0.211325
E5RI94	WD repeat-containing protein 67 OS=Homo sapiens GN=WDR67 PE=2 SV=1 - [E5RI94_HUMAN]	0	0	0	0	0	0.978129	0.967055	0.949037	0.96474	0.0146837	3.86052e-05
E5RJ39	RNA-binding Raly-like protein OS=Homo sapiens GN=RALYL PE=2 SV=1 - [E5RJ39_HUMAN]	0	0	0	0	0	0	0.967055	0	0.322352	0.55833	0.211325
E5RJC6	UPF0544 protein C5orf45 OS=Homo sapiens GN=C5orf45 PE=2 SV=1 - [E5RJC6_HUMAN]	0	0	0	0	0	0	0.967055	0	0.322352	0.55833	0.211325
E5RJT0	Eukaryotic translation initiation factor 3 subunit H (Fragment) OS=Homo sapiens GN=EIF3H PE=2 SV=1 - [E5RJT0_HUMAN]	0	0	0	0	0	0	0	0.949037	0.316346	0.547927	0.211325
E5RJZ1	Cytochrome c oxidase subunit 7A-related protein, mitochondrial OS=Homo sapiens GN=COX7A2L PE=2 SV=1 - [E5RJZ1_HUMAN]	0	0	0	0	0	1.95626	1.93411	0	1.29679	1.12311	0.0917583
E5RK82	Centrin-3 OS=Homo sapiens GN=CETN3 PE=2 SV=1 - [E5RK82_HUMAN]	0	0	0	0	0	0.978129	0.967055	1.89807	1.28109	0.534356	0.0266959
E7EMF1	Integrin alpha-2 OS=Homo sapiens GN=ITGA2 PE=2 SV=1 - [E7EMF1_HUMAN]	0	0	0	0	0	6.8469	0	0	2.2823	3.95306	0.211325
E7EMN6	Protein phosphatase inhibitor 2 (Fragment) OS=Homo sapiens GN=PPP1R2 PE=2 SV=1 - [E7EMN6_HUMAN]	0	0	0	0	0	0.978129	0	0	0.326043	0.564723	0.211325
E7EMW7	E3 ubiquitin-protein ligase UBR5 OS=Homo sapiens GN=UBR5 PE=2 SV=1 - [E7EMW7_HUMAN]	0	0	0	0	0	0	0	0.949037	0.316346	0.547927	0.211325
E7ENP0	Thromboxane-A synthase OS=Homo sapiens GN=TBXAS1 PE=2 SV=1 - [E7ENP0_HUMAN]	0	0	0	0	0	6.8469	3.86822	3.79615	4.83709	1.74092	0.0202846
E7EP32	Guanine nucleotide-binding protein G(I)/G(S)/G(T) subunit beta-2 OS=Homo sapiens GN=GNB2 PE=4 SV=1 - [E7EP32_HUMAN]	0	0	0	0	0	0	22.2423	0	7.41409	12.8416	0.211325
E7EP56	Nuclear pore membrane glycoprotein 210-like OS=Homo sapiens GN=NUP210L PE=2 SV=2 - [E7EP56_HUMAN]	0	0	0	0	0	0	0.967055	0	0.322352	0.55833	0.211325
E7EP60	Integrin alpha-4 (Fragment) OS=Homo sapiens GN=ITGA4 PE=2 SV=1 - [E7EP60_HUMAN]	0	0	0	0	0	0	0	1.89807	0.632691	1.09585	0.211325
E7EPA1	Phosphoribosyl pyrophosphate synthase-associated protein 2 (Fragment) OS=Homo sapiens GN=PRPSAP2 PE=4 SV=1 - [E7EPA1_HUMAN]	0	0	0	0	0	0	0	3.79615	1.26538	2.19171	0.211325
E7EPF5	Cytoplasmic protein NCK2 (Fragment) OS=Homo sapiens GN=NCK2 PE=2 SV=1 - [E7EPF5_HUMAN]	0	0	0	0	0	0	0.967055	1.89807	0.955043	0.949094	0.111736
E7EPG1	Multimerin-1 OS=Homo sapiens GN=MMRN1 PE=2 SV=1 - [E7EPG1_HUMAN]	0	0	0	0	0	0	0.967055	0.949037	0.638697	0.553201	0.0917698
E7EQ01	Caspase-8 subunit p10 (Fragment) OS=Homo sapiens GN=CASP8 PE=2 SV=1 - [E7EQ01_HUMAN]	0	0	0	0	0	0.978129	0	0.949037	0.642389	0.556515	0.0917982
E7EQ12	DNA-directed RNA polymerase I subunit RPA34 OS=Homo sapiens GN=CAST PE=2 SV=1 - [E7EQ12_HUMAN]	0	0	0	0	0	0.978129	0	0	0.326043	0.564723	0.211325
E7EQ29	Beta-galactosidase OS=Homo sapiens GN=GLB1 PE=2 SV=1 - [E7EQ29_HUMAN]	0	0	0	0	0	0	9.67055	0	3.22352	5.5833	0.211325
E7EQL2	PGAP2-interacting protein OS=Homo sapiens GN=CWH43 PE=2 SV=1 - [E7EQL2_HUMAN]	0	0	0	0	0	0	0	0.949037	0.316346	0.547927	0.211325
E7EQV9	Ribosomal protein L15 (Fragment) OS=Homo sapiens GN=RPL15 PE=2 SV=1 - [E7EQV9_HUMAN]	0	0	0	0	0	12.7157	0	0	4.23856	7.3414	0.211325
E7ER27	Peroxisomal multifunctional enzyme type 2 OS=Homo sapiens GN=HSD17B4 PE=2 SV=3 - [E7ER27_HUMAN]	0	0	0	0	0	0	14.5058	16.1336	10.2132	8.88222	0.0923266
E7ER61	Receptor-type tyrosine-protein kinase FLT3 OS=Homo sapiens GN=FLT3 PE=2 SV=1 - [E7ER61_HUMAN]	0	0	0	0	0	0.978129	0	0	0.326043	0.564723	0.211325
E7ERL6	Microtubule-associated serine/threonine-protein kinase 2 OS=Homo sapiens GN=MAST2 PE=2 SV=1 - [E7ERL6_HUMAN]	0	0	0	0	0	0.978129	0	0	0.326043	0.564723	0.211325
E7ET33	Inter-alpha-trypsin inhibitor heavy chain H3 OS=Homo sapiens GN=ITIH3 PE=2 SV=1 - [E7ET33_HUMAN]	0	0	0	0	0	2.93439	0	0	0.978129	1.69417	0.211325
E7ET77	Syntaxin-3 OS=Homo sapiens GN=STX3 PE=2 SV=1 - [E7ET77_HUMAN]	0	0	0	0	0	0.978129	0	0	0.326043	0.564723	0.211325
E7ETN3	Uncharacterized protein OS=Homo sapiens PE=2 SV=1 - [E7ETN3_HUMAN]	0	0	0	0	0	0	14.5058	0	4.83528	8.37494	0.211325
E7ETU9	Procollagen-lysine,2-oxoglutarate 5-dioxygenase 2 OS=Homo sapiens GN=PLOD2 PE=2 SV=1 - [E7ETU9_HUMAN]	0	0	0	0	0	13.6938	14.5058	15.1846	14.4614	0.746383	0.000443377
E7ETZ4	Basic leucine zipper and W2 domain-containing protein 2 (Fragment) OS=Homo sapiens GN=BZW2 PE=2 SV=1 - [E7ETZ4_HUMAN]	0	0	0	0	0	1.95626	0	0	0.652086	1.12945	0.211325
E7EUI7	Protein phosphatase inhibitor 2 OS=Homo sapiens GN=PPP1R2 PE=2 SV=1 - [E7EUI7_HUMAN]	0	0	0	0	0	0	0	0.949037	0.316346	0.547927	0.211325
E7EUL7	Sperm-specific antigen 2 OS=Homo sapiens GN=SSFA2 PE=2 SV=1 - [E7EUL7_HUMAN]	0	0	0	0	0	0	0.967055	0	0.322352	0.55833	0.211325
E7EUY3	Propionyl-CoA carboxylase beta chain, mitochondrial OS=Homo sapiens GN=PCCB PE=2 SV=1 - [E7EUY3_HUMAN]	0	0	0	0	0	37.1689	0	35.1144	24.0944	20.8917	0.0919165
E7EV41	Sodium/calcium exchanger 1 OS=Homo sapiens GN=SLC8A1 PE=2 SV=1 - [E7EV41_HUMAN]	0	0	0	0	0	0	0	0.949037	0.316346	0.547927	0.211325
E7EV54	Proline-, glutamic acid- and leucine-rich protein 1 OS=Homo sapiens GN=PELP1 PE=2 SV=1 - [E7EV54_HUMAN]	0	0	0	0	0	0	2.90117	2.84711	1.91609	1.6596	0.0917698
E7EV87	DEP domain-containing mTOR-interacting protein OS=Homo sapiens GN=DEPTOR PE=2 SV=1 - [E7EV87_HUMAN]	0	0	0	0	0	0.978129	0	0	0.326043	0.564723	0.211325
E7EVD1	U4/U6 small nuclear ribonucleoprotein Prp3 OS=Homo sapiens GN=PRPF3 PE=2 SV=1 - [E7EVD1_HUMAN]	0	0	0	0	0	0	0	1.89807	0.632691	1.09585	0.211325
E7EVG2	Protein polybromo-1 (Fragment) OS=Homo sapiens GN=PBRM1 PE=2 SV=1 - [E7EVG2_HUMAN]	0	0	0	0	0	0.978129	0	0	0.326043	0.564723	0.211325
E7EVG6	Peroxisome proliferator-activated receptor gamma coactivator-related protein 1 OS=Homo sapiens GN=PPRC1 PE=2 SV=1 - [E7EVG6_HUMAN]	0	0	0	0	0	0	0.967055	0	0.322352	0.55833	0.211325
E7EVJ5	Cytoplasmic FMR1-interacting protein 2 OS=Homo sapiens GN=CYFIP2 PE=2 SV=1 - [E7EVJ5_HUMAN]	0	0	0	0	0	1.95626	0	0	0.652086	1.12945	0.211325
E7EVW7	Hematopoietic lineage cell-specific protein OS=Homo sapiens GN=HCLS1 PE=2 SV=1 - [E7EVW7_HUMAN]	0	0	0	0	0	1.95626	1.93411	2.84711	2.24583	0.520845	0.00873015
E7EX44	Caldesmon OS=Homo sapiens GN=CALD1 PE=2 SV=1 - [E7EX44_HUMAN]	0	0	0	0	0	0	0	145.203	48.4009	83.8328	0.211325
E7EX47	Platelet glycoprotein 4 (Fragment) OS=Homo sapiens GN=CD36 PE=2 SV=1 - [E7EX47_HUMAN]	0	0	0	0	0	2.93439	0.967055	0	1.30048	1.49534	0.135475
E9PB90	Hexokinase-2 OS=Homo sapiens GN=HK2 PE=2 SV=1 - [E9PB90_HUMAN]	0	0	0	0	0	7.82503	11.6047	11.3884	10.2727	2.12251	0.00696668
E9PB93	DNA-directed RNA polymerase II subunit RPB4 OS=Homo sapiens GN=POLR2D PE=2 SV=1 - [E9PB93_HUMAN]	0	0	0	0	0	0	0	0.949037	0.316346	0.547927	0.211325
E9PBA6	CLIP-associating protein 2 OS=Homo sapiens GN=CLASP2 PE=2 SV=2 - [E9PBA6_HUMAN]	0	0	0	0	0	0	1.93411	0	0.644704	1.11666	0.211325
E9PBC5	Plasma kallikrein heavy chain OS=Homo sapiens GN=KLKB1 PE=2 SV=1 - [E9PBC5_HUMAN]	0	0	0	0	0	0	0.967055	0.949037	0.638697	0.553201	0.0917698
E9PBD8	Lymphocyte-specific protein 1 (Fragment) OS=Homo sapiens GN=LSP1 PE=4 SV=1 - [E9PBD8_HUMAN]	0	0	0	0	0	4.89065	6.76939	6.64326	6.1011	1.05018	0.00486611
E9PBG5	Regulator of G-protein-signaling 12 OS=Homo sapiens GN=RGS12 PE=4 SV=1 - [E9PBG5_HUMAN]	0	0	0	0	0	0	0	0.949037	0.316346	0.547927	0.211325
E9PBJ4	Tubulin beta chain OS=Homo sapiens GN=TUBB PE=2 SV=1 - [E9PBJ4_HUMAN]	0	0	0	0	0	0	97.6726	0	32.5575	56.3913	0.211325
E9PBW4	Hemoglobin subunit gamma-2 OS=Homo sapiens GN=HBG2 PE=2 SV=1 - [E9PBW4_HUMAN]	0	0	0	0	0	0	140.223	0	46.741	80.9578	0.211325
E9PC44	Protein transport protein Sec24D OS=Homo sapiens GN=SEC24D PE=2 SV=2 - [E9PC44_HUMAN]	0	0	0	0	0	0	0	0.949037	0.316346	0.547927	0.211325
E9PC52	Histone-binding protein RBBP7 OS=Homo sapiens GN=RBBP7 PE=2 SV=1 - [E9PC52_HUMAN]	0	0	0	0	0	8.80316	0	0	2.93439	5.08251	0.211325
E9PCE5	Protein SMG7 OS=Homo sapiens GN=SMG7 PE=2 SV=1 - [E9PCE5_HUMAN]	0	0	0	0	0	0	0	0.949037	0.316346	0.547927	0.211325
E9PCX7	NAD(P) transhydrogenase, mitochondrial OS=Homo sapiens GN=NNT PE=2 SV=1 - [E9PCX7_HUMAN]	0	0	0	0	0	0	0.967055	0.949037	0.638697	0.553201	0.0917698
E9PCZ3	Type II inositol 3,4-bisphosphate 4-phosphatase (Fragment) OS=Homo sapiens GN=INPP4B PE=2 SV=1 - [E9PCZ3_HUMAN]	0	0	0	0	0	0	0	0.949037	0.316346	0.547927	0.211325
E9PDQ5	Rho guanine nucleotide exchange factor 7 OS=Homo sapiens GN=ARHGEF7 PE=2 SV=1 - [E9PDQ5_HUMAN]	0	0	0	0	0	0	0.967055	1.89807	0.955043	0.949094	0.111736
E9PE24	Visinin-like protein 1 (Fragment) OS=Homo sapiens GN=VSNL1 PE=2 SV=1 - [E9PE24_HUMAN]	0	0	0	0	0	0.978129	0	0	0.326043	0.564723	0.211325
E9PEH6	Epsilon-sarcoglycan OS=Homo sapiens GN=SGCE PE=2 SV=1 - [E9PEH6_HUMAN]	0	0	0	0	0	0	0	0.949037	0.316346	0.547927	0.211325
E9PEQ6	Peptidyl-prolyl cis-trans isomerase OS=Homo sapiens GN=PPIE PE=2 SV=1 - [E9PEQ6_HUMAN]	0	0	0	0	0	0	0	1.89807	0.632691	1.09585	0.211325
E9PF19	Transducin beta-like protein 2 OS=Homo sapiens GN=TBL2 PE=2 SV=1 - [E9PF19_HUMAN]	0	0	0	0	0	2.93439	1.93411	1.89807	2.25552	0.588189	0.0109627
E9PF84	Isocitrate dehydrogenase [NAD] subunit gamma, mitochondrial (Fragment) OS=Homo sapiens GN=IDH3G PE=2 SV=1 - [E9PF84_HUMAN]	0	0	0	0	0	0	0	2.84711	0.949037	1.64378	0.211325
E9PF88	Metastasis-associated protein MTA3 OS=Homo sapiens GN=MTA3 PE=2 SV=1 - [E9PF88_HUMAN]	0	0	0	0	0	0.978129	0	0	0.326043	0.564723	0.211325
E9PFD7	Epidermal growth factor receptor OS=Homo sapiens GN=EGFR PE=2 SV=2 - [E9PFD7_HUMAN]	0	0	0	0	0	0	0	18.9807	6.32691	10.9585	0.211325
E9PGI0	Arylsulfatase K OS=Homo sapiens GN=ARSK PE=2 SV=1 - [E9PGI0_HUMAN]	0	0	0	0	0	0	0.967055	0	0.322352	0.55833	0.211325
E9PGR5	Ecto-ADP-ribosyltransferase 3 (Fragment) OS=Homo sapiens GN=ART3 PE=2 SV=1 - [E9PGR5_HUMAN]	0	0	0	0	0	0.978129	0	0	0.326043	0.564723	0.211325
E9PHD0	Ubiquitin-conjugating enzyme E2 Q2 (Fragment) OS=Homo sapiens GN=UBE2Q2 PE=4 SV=2 - [E9PHD0_HUMAN]	0	0	0	0	0	0	0	0.949037	0.316346	0.547927	0.211325
E9PI04	Synembryn-A (Fragment) OS=Homo sapiens GN=RIC8A PE=2 SV=1 - [E9PI04_HUMAN]	0	0	0	0	0	0	0	1.89807	0.632691	1.09585	0.211325
E9PIT3	Thrombin light chain OS=Homo sapiens GN=F2 PE=2 SV=1 - [E9PIT3_HUMAN]	0	0	0	0	0	0	9.67055	0	3.22352	5.5833	0.211325
E9PJ81	UBX domain-containing protein 1 (Fragment) OS=Homo sapiens GN=UBXN1 PE=2 SV=1 - [E9PJ81_HUMAN]	0	0	0	0	0	0.978129	0	1.89807	0.958734	0.949185	0.111157
E9PJB8	Selenoprotein S OS=Homo sapiens GN=VIMP PE=4 SV=1 - [E9PJB8_HUMAN]	0	0	0	0	0	2.93439	0	2.84711	1.92717	1.66954	0.0917982
E9PJK1	CD81 antigen OS=Homo sapiens GN=CD81 PE=4 SV=1 - [E9PJK1_HUMAN]	0	0	0	0	0	0.978129	0	2.84711	1.27508	1.4466	0.133193
E9PJP2	Protein SOGA3 OS=Homo sapiens GN=SOGA3 PE=2 SV=1 - [E9PJP2_HUMAN]	0	0	0	0	0	0	0	1.89807	0.632691	1.09585	0.211325
E9PJY0	Mitochondrial glutamate carrier 1 OS=Homo sapiens GN=SLC25A22 PE=3 SV=1 - [E9PJY0_HUMAN]	0	0	0	0	0	0.978129	0	0	0.326043	0.564723	0.211325
E9PK01	Elongation factor 1-delta (Fragment) OS=Homo sapiens GN=EEF1D PE=2 SV=1 - [E9PK01_HUMAN]	0	0	0	0	0	24.4532	0	0	8.15108	14.1181	0.211325
E9PK09	Bcl-2-associated transcription factor 1 (Fragment) OS=Homo sapiens GN=BCLAF1 PE=2 SV=1 - [E9PK09_HUMAN]	0	0	0	0	0	0	1.93411	0	0.644704	1.11666	0.211325
E9PK67	Poly [ADP-ribose] polymerase 10 OS=Homo sapiens GN=PARP10 PE=2 SV=1 - [E9PK67_HUMAN]	0	0	0	0	0	0.978129	0.967055	0	0.648395	0.561554	0.0917583
E9PKD2	Nuclear pore complex protein Nup214 (Fragment) OS=Homo sapiens GN=NUP214 PE=2 SV=1 - [E9PKD2_HUMAN]	0	0	0	0	0	0	0	0.949037	0.316346	0.547927	0.211325
E9PKF8	Eukaryotic translation initiation factor 4 gamma 2 (Fragment) OS=Homo sapiens GN=EIF4G2 PE=2 SV=1 - [E9PKF8_HUMAN]	0	0	0	0	0	0	0.967055	0.949037	0.638697	0.553201	0.0917698
E9PKN0	Pre-mRNA cleavage complex 2 protein Pcf11 (Fragment) OS=Homo sapiens GN=PCF11 PE=2 SV=1 - [E9PKN0_HUMAN]	0	0	0	0	0	0	0.967055	0	0.322352	0.55833	0.211325
E9PKN4	Cold shock domain-containing protein E1 (Fragment) OS=Homo sapiens GN=CSDE1 PE=2 SV=1 - [E9PKN4_HUMAN]	0	0	0	0	0	0.978129	0	0	0.326043	0.564723	0.211325
E9PL09	40S ribosomal protein S3 OS=Homo sapiens GN=RPS3 PE=2 SV=1 - [E9PL09_HUMAN]	0	0	0	0	0	16.6282	0	0	5.54273	9.60029	0.211325
E9PLJ3	Cofilin-1 (Fragment) OS=Homo sapiens GN=CFL1 PE=2 SV=1 - [E9PLJ3_HUMAN]	0	0	0	0	0	13.6938	0	0	4.5646	7.90612	0.211325
E9PLT9	Transmembrane protein 225 (Fragment) OS=Homo sapiens GN=TMEM225 PE=2 SV=1 - [E9PLT9_HUMAN]	0	0	0	0	0	0	0	0.949037	0.316346	0.547927	0.211325
E9PLW2	Oxidation resistance protein 1 OS=Homo sapiens GN=OXR1 PE=2 SV=1 - [E9PLW2_HUMAN]	0	0	0	0	0	0	0	0.949037	0.316346	0.547927	0.211325
E9PLW6	L-aminoadipate-semialdehyde dehydrogenase-phosphopantetheinyl transferase (Fragment) OS=Homo sapiens GN=AASDHPPT PE=2 SV=1 - [E9PLW6_HUMAN]	0	0	0	0	0	0.978129	0.967055	0	0.648395	0.561554	0.0917583
E9PM95	Apolipoprotein L2 (Fragment) OS=Homo sapiens GN=APOL2 PE=2 SV=1 - [E9PM95_HUMAN]	0	0	0	0	0	0	4.83528	6.64326	3.82618	3.43467	0.0967236
E9PMC5	V-type proton ATPase 116 kDa subunit a isoform 3 OS=Homo sapiens GN=TCIRG1 PE=2 SV=1 - [E9PMC5_HUMAN]	0	0	0	0	0	0	0.967055	0	0.322352	0.55833	0.211325
E9PMT5	CD3 delta OS=Homo sapiens GN=CD3D PE=4 SV=1 - [E9PMT5_HUMAN]	0	0	0	0	0	0.978129	0	1.89807	0.958734	0.949185	0.111157
E9PNJ4	Stromal interaction molecule 1 OS=Homo sapiens GN=STIM1 PE=2 SV=1 - [E9PNJ4_HUMAN]	0	0	0	0	0	0	12.5717	0	4.19057	7.25829	0.211325
E9PPC8	Serine/threonine-protein phosphatase (Fragment) OS=Homo sapiens GN=PPP3CA PE=2 SV=1 - [E9PPC8_HUMAN]	0	0	0	0	0	0	0.967055	0	0.322352	0.55833	0.211325
E9PPU0	Epiplakin OS=Homo sapiens GN=EPPK1 PE=4 SV=1 - [E9PPU0_HUMAN]	0	0	0	0	0	0	18.3741	0	6.12468	10.6083	0.211325
E9PPW6	Mitochondrial fission factor OS=Homo sapiens GN=MFF PE=2 SV=1 - [E9PPW6_HUMAN]	0	0	0	0	0	0.978129	0	0	0.326043	0.564723	0.211325
E9PQ61	Zinc finger CCCH domain-containing protein 11A OS=Homo sapiens GN=ZC3H11A PE=2 SV=1 - [E9PQ61_HUMAN]	0	0	0	0	0	0.978129	0	0	0.326043	0.564723	0.211325
E9PQD7	40S ribosomal protein S2 OS=Homo sapiens GN=RPS2 PE=2 SV=1 - [E9PQD7_HUMAN]	0	0	0	0	0	0	10.6376	0	3.54587	6.14163	0.211325
E9PQS1	Ester hydrolase C11orf54 (Fragment) OS=Homo sapiens GN=C11orf54 PE=2 SV=1 - [E9PQS1_HUMAN]	0	0	0	0	0	0	18.3741	18.9807	12.4516	10.7877	0.0918055
E9PQW1	Caspase recruitment domain-containing protein 16 (Fragment) OS=Homo sapiens GN=CARD16 PE=2 SV=1 - [E9PQW1_HUMAN]	0	0	0	0	0	0	0	0.949037	0.316346	0.547927	0.211325
E9PR76	Repressor of RNA polymerase III transcription MAF1 homolog (Fragment) OS=Homo sapiens GN=MAF1 PE=2 SV=1 - [E9PR76_HUMAN]	0	0	0	0	0	0.978129	0	0.949037	0.642389	0.556515	0.0917982
E9PRQ2	Mitogen-activated protein kinase kinase kinase 11 (Fragment) OS=Homo sapiens GN=MAP3K11 PE=2 SV=1 - [E9PRQ2_HUMAN]	0	0	0	0	0	0.978129	0	0	0.326043	0.564723	0.211325
E9PRR1	Butyrophilin subfamily 3 member A2 (Fragment) OS=Homo sapiens GN=BTN3A2 PE=2 SV=1 - [E9PRR1_HUMAN]	0	0	0	0	0	0	0.967055	0.949037	0.638697	0.553201	0.0917698
E9PRZ0	Dual-specificity mitogen-activated protein kinase kinase 3 (Fragment) OS=Homo sapiens GN=MAP2K3 PE=2 SV=2 - [E9PRZ0_HUMAN]	0	0	0	0	0	0	0.967055	0	0.322352	0.55833	0.211325
E9PRZ9	Small acidic protein (Fragment) OS=Homo sapiens GN=C11orf58 PE=2 SV=1 - [E9PRZ9_HUMAN]	0	0	0	0	0	0	0	0.949037	0.316346	0.547927	0.211325
E9PSB6	Probable exonuclease mut-7 homolog, isoform 5 OS=Homo sapiens GN=EXD3 PE=2 SV=1 - [E9PSB6_HUMAN]	0	0	0	0	0	0.978129	0.967055	0	0.648395	0.561554	0.0917583
E9PSD3	Acidic fibroblast growth factor intracellular-binding protein OS=Homo sapiens GN=FIBP PE=2 SV=1 - [E9PSD3_HUMAN]	0	0	0	0	0	1.95626	0	0	0.652086	1.12945	0.211325
E9PSH8	T-cell surface glycoprotein CD3 epsilon chain OS=Homo sapiens GN=CD3E PE=2 SV=1 - [E9PSH8_HUMAN]	0	0	0	0	0	0.978129	0	0	0.326043	0.564723	0.211325
F2Z299	Leucine-rich repeat-containing protein 23 OS=Homo sapiens GN=LRRC23 PE=4 SV=1 - [F2Z299_HUMAN]	0	0	0	0	0	0	0.967055	0	0.322352	0.55833	0.211325
F2Z2B9	Gamma-tubulin complex component 2 OS=Homo sapiens GN=TUBGCP2 PE=2 SV=1 - [F2Z2B9_HUMAN]	0	0	0	0	0	0	0	0.949037	0.316346	0.547927	0.211325
F2Z2D5	Protein POF1B OS=Homo sapiens GN=POF1B PE=2 SV=1 - [F2Z2D5_HUMAN]	0	0	0	0	0	0	0	0.949037	0.316346	0.547927	0.211325
F2Z3J9	Prostaglandin reductase 1 (Fragment) OS=Homo sapiens GN=PTGR1 PE=2 SV=2 - [F2Z3J9_HUMAN]	0	0	0	0	0	0	0	0.949037	0.316346	0.547927	0.211325
F2Z3K8	Dystrophin-related protein 2 OS=Homo sapiens GN=DRP2 PE=2 SV=1 - [F2Z3K8_HUMAN]	0	0	0	0	0	0	0.967055	0	0.322352	0.55833	0.211325
F5GWI4	Adenosine deaminase OS=Homo sapiens GN=ADA PE=2 SV=1 - [F5GWI4_HUMAN]	0	0	0	0	0	2.93439	0	0	0.978129	1.69417	0.211325
F5GWK3	Pre-mRNA-splicing factor RBM22 OS=Homo sapiens GN=RBM22 PE=2 SV=1 - [F5GWK3_HUMAN]	0	0	0	0	0	0.978129	0	0	0.326043	0.564723	0.211325
F5GX84	LIM and cysteine-rich domains protein 1 OS=Homo sapiens GN=LMCD1 PE=2 SV=1 - [F5GX84_HUMAN]	0	0	0	0	0	11.7375	0	0	3.91252	6.77668	0.211325
F5GX88	Uncharacterized protein OS=Homo sapiens GN=ENG PE=4 SV=1 - [F5GX88_HUMAN]	0	0	0	0	0	9.78129	0	0	3.26043	5.64723	0.211325
F5GX90	P2Y purinoceptor 6 (Fragment) OS=Homo sapiens GN=P2RY6 PE=2 SV=1 - [F5GX90_HUMAN]	0	0	0	0	0	0	0	0.949037	0.316346	0.547927	0.211325
F5GXQ0	BRO1 domain-containing protein BROX OS=Homo sapiens GN=BROX PE=2 SV=1 - [F5GXQ0_HUMAN]	0	0	0	0	0	0	0.967055	0	0.322352	0.55833	0.211325
F5GXR0	FERM domain-containing protein 1 OS=Homo sapiens GN=FRMD1 PE=2 SV=1 - [F5GXR0_HUMAN]	0	0	0	0	0	0	0.967055	0	0.322352	0.55833	0.211325
F5GXV0	Supervillin OS=Homo sapiens GN=SVIL PE=2 SV=1 - [F5GXV0_HUMAN]	0	0	0	0	0	0	0.967055	0	0.322352	0.55833	0.211325
F5GXV9	Regulatory-associated protein of mTOR OS=Homo sapiens GN=RPTOR PE=2 SV=1 - [F5GXV9_HUMAN]	0	0	0	0	0	0	0.967055	0	0.322352	0.55833	0.211325
F5GY03	SPARC (Fragment) OS=Homo sapiens GN=SPARC PE=2 SV=1 - [F5GY03_HUMAN]	0	0	0	0	0	8.80316	5.80233	6.64326	7.08292	1.54797	0.00777549
F5GY56	Pre-mRNA-processing factor 19 (Fragment) OS=Homo sapiens GN=PRPF19 PE=2 SV=1 - [F5GY56_HUMAN]	0	0	0	0	0	0.978129	0.967055	0.949037	0.96474	0.0146837	3.86052e-05
F5GYH2	Lysine-specific demethylase 4C OS=Homo sapiens GN=KDM4C PE=2 SV=1 - [F5GYH2_HUMAN]	0	0	0	0	0	0	0	0.949037	0.316346	0.547927	0.211325
F5GYS3	Bcl2 antagonist of cell death OS=Homo sapiens GN=BAD PE=2 SV=1 - [F5GYS3_HUMAN]	0	0	0	0	0	0.978129	0	0.949037	0.642389	0.556515	0.0917982
F5GZ09	Intraflagellar transport protein 27 homolog (Fragment) OS=Homo sapiens GN=IFT27 PE=2 SV=1 - [F5GZ09_HUMAN]	0	0	0	0	0	0	2.90117	0	0.967055	1.67499	0.211325
F5GZV9	Pyrin OS=Homo sapiens GN=MEFV PE=2 SV=1 - [F5GZV9_HUMAN]	0	0	0	0	0	0	0.967055	0	0.322352	0.55833	0.211325
F5H050	Cytoplasmic dynein 1 intermediate chain 1 OS=Homo sapiens GN=DYNC1I1 PE=2 SV=1 - [F5H050_HUMAN]	0	0	0	0	0	0	0	0.949037	0.316346	0.547927	0.211325
F5H0J3	NADH dehydrogenase [ubiquinone] 1 alpha subcomplex subunit 9, mitochondrial OS=Homo sapiens GN=NDUFA9 PE=2 SV=1 - [F5H0J3_HUMAN]	0	0	0	0	0	5.86877	10.6376	0	5.50213	5.32827	0.107792
F5H0N7	CAP-Gly domain-containing linker protein 1 OS=Homo sapiens GN=CLIP1 PE=2 SV=1 - [F5H0N7_HUMAN]	0	0	0	0	0	7.82503	0	0	2.60834	4.51778	0.211325
F5H0R8	Epidermal growth factor receptor kinase substrate 8 OS=Homo sapiens GN=EPS8 PE=2 SV=1 - [F5H0R8_HUMAN]	0	0	0	0	0	0.978129	1.93411	0	0.970747	0.967076	0.112116
F5H168	tRNA pseudouridine synthase A, mitochondrial OS=Homo sapiens GN=PUS1 PE=2 SV=1 - [F5H168_HUMAN]	0	0	0	0	0	0.978129	0.967055	0	0.648395	0.561554	0.0917583
F5H170	DnaJ homolog subfamily A member 4 OS=Homo sapiens GN=DNAJA4 PE=2 SV=1 - [F5H170_HUMAN]	0	0	0	0	0	0	0	2.84711	0.949037	1.64378	0.211325
F5H1E5	Conserved oligomeric Golgi complex subunit 2 OS=Homo sapiens GN=COG2 PE=2 SV=1 - [F5H1E5_HUMAN]	0	0	0	0	0	2.93439	0	0	0.978129	1.69417	0.211325
F5H1Z4	Poly(A)-specific ribonuclease PARN OS=Homo sapiens GN=PARN PE=2 SV=1 - [F5H1Z4_HUMAN]	0	0	0	0	0	0.978129	0	0	0.326043	0.564723	0.211325
F5H244	Importin-8 (Fragment) OS=Homo sapiens GN=IPO8 PE=2 SV=1 - [F5H244_HUMAN]	0	0	0	0	0	0	0	0.949037	0.316346	0.547927	0.211325
F5H282	T-complex protein 1 subunit alpha OS=Homo sapiens GN=TCP1 PE=2 SV=1 - [F5H282_HUMAN]	0	0	0	0	0	1.95626	1.93411	0	1.29679	1.12311	0.0917583
F5H2E3	Oligophrenin-1 OS=Homo sapiens GN=OPHN1 PE=2 SV=1 - [F5H2E3_HUMAN]	0	0	0	0	0	0	0.967055	0	0.322352	0.55833	0.211325
F5H2K2	Zinc finger protein 516 (Fragment) OS=Homo sapiens GN=ZNF516 PE=2 SV=1 - [F5H2K2_HUMAN]	0	0	0	0	0	0	0.967055	0	0.322352	0.55833	0.211325
F5H410	ATP-binding cassette sub-family C member 11 OS=Homo sapiens GN=ABCC11 PE=2 SV=1 - [F5H410_HUMAN]	0	0	0	0	0	0	0	0.949037	0.316346	0.547927	0.211325
F5H425	Eukaryotic translation initiation factor 3 subunit J OS=Homo sapiens GN=EIF3J PE=2 SV=1 - [F5H425_HUMAN]	0	0	0	0	0	1.95626	0	3.79615	1.91747	1.89837	0.111157
F5H456	RRP12-like protein OS=Homo sapiens GN=RRP12 PE=2 SV=1 - [F5H456_HUMAN]	0	0	0	0	0	0.978129	0.967055	0	0.648395	0.561554	0.0917583
F5H4B4-2	Isoform 2 of Protein FAM227A OS=Homo sapiens GN=FAM227A - [F227A_HUMAN]	0	0	0	0	0	0	0	0.949037	0.316346	0.547927	0.211325
F5H4S9	Tight junction protein ZO-3 OS=Homo sapiens GN=TJP3 PE=2 SV=1 - [F5H4S9_HUMAN]	0	0	0	0	0	0.978129	0	0	0.326043	0.564723	0.211325
F5H5B7	Cleavage and polyadenylation-specificity factor subunit 7 OS=Homo sapiens GN=CPSF7 PE=2 SV=1 - [F5H5B7_HUMAN]	0	0	0	0	0	0.978129	0	0	0.326043	0.564723	0.211325
F5H669	Cleavage and polyadenylation-specificity factor subunit 7 (Fragment) OS=Homo sapiens GN=CPSF7 PE=2 SV=1 - [F5H669_HUMAN]	0	0	0	0	0	0	0.967055	0	0.322352	0.55833	0.211325
F5H6I3	Protein kinase C-binding protein NELL1 OS=Homo sapiens GN=NELL1 PE=2 SV=1 - [F5H6I3_HUMAN]	0	0	0	0	0	0.978129	0	0	0.326043	0.564723	0.211325
F5H6L8	Hepatocyte growth factor-like protein alpha chain OS=Homo sapiens GN=MST1 PE=2 SV=1 - [F5H6L8_HUMAN]	0	0	0	0	0	0.978129	0	0.949037	0.642389	0.556515	0.0917982
F5H6Q3	Ubiquitin carboxyl-terminal hydrolase 28 (Fragment) OS=Homo sapiens GN=USP28 PE=2 SV=1 - [F5H6Q3_HUMAN]	0	0	0	0	0	0.978129	0	0	0.326043	0.564723	0.211325
F5H6R7	Ras-related protein Rap-1b (Fragment) OS=Homo sapiens GN=RAP1B PE=2 SV=1 - [F5H6R7_HUMAN]	0	0	0	0	0	20.5407	0	0	6.8469	11.8592	0.211325
F5H715	Axin interactor, dorsalization-associated protein OS=Homo sapiens GN=AIDA PE=2 SV=1 - [F5H715_HUMAN]	0	0	0	0	0	2.93439	0	0.949037	1.29447	1.49738	0.1365
F5H721	WW domain-binding protein 11 OS=Homo sapiens GN=WBP11 PE=2 SV=1 - [F5H721_HUMAN]	0	0	0	0	0	0.978129	0	0.949037	0.642389	0.556515	0.0917982
F5H775	DNA damage-binding protein 1 (Fragment) OS=Homo sapiens GN=DDB1 PE=2 SV=1 - [F5H775_HUMAN]	0	0	0	0	0	0	0	0.949037	0.316346	0.547927	0.211325
F5H7C6	COP9 signalosome complex subunit 7a (Fragment) OS=Homo sapiens GN=COPS7A PE=2 SV=1 - [F5H7C6_HUMAN]	0	0	0	0	0	4.89065	0	0	1.63022	2.82362	0.211325
F5H7E1	Inter-alpha-trypsin inhibitor heavy chain H1 OS=Homo sapiens GN=ITIH1 PE=4 SV=1 - [F5H7E1_HUMAN]	0	0	0	0	0	5.86877	7.73644	12.3375	8.64756	3.32921	0.0230108
F5H7E2	Superkiller viralicidic activity 2-like 2 OS=Homo sapiens GN=SKIV2L2 PE=2 SV=1 - [F5H7E2_HUMAN]	0	0	0	0	0	0.978129	0	0	0.326043	0.564723	0.211325
F5H7H6	DNA polymerase (Fragment) OS=Homo sapiens GN=POLE PE=2 SV=1 - [F5H7H6_HUMAN]	0	0	0	0	0	0.978129	0	0	0.326043	0.564723	0.211325
F5H7R8	E3 ubiquitin-protein ligase CHFR OS=Homo sapiens GN=CHFR PE=2 SV=1 - [F5H7R8_HUMAN]	0	0	0	0	0	0	0	0.949037	0.316346	0.547927	0.211325
F5H7V0	Armadillo repeat-containing protein 6 (Fragment) OS=Homo sapiens GN=ARMC6 PE=2 SV=1 - [F5H7V0_HUMAN]	0	0	0	0	0	0	0	0.949037	0.316346	0.547927	0.211325
F5H7X1	26S proteasome non-ATPase regulatory subunit 9 OS=Homo sapiens GN=PSMD9 PE=2 SV=1 - [F5H7X1_HUMAN]	0	0	0	0	0	2.93439	4.83528	3.79615	3.85527	0.951823	0.00985952
F5H850	Centrosomal protein of 112 kDa OS=Homo sapiens GN=CEP112 PE=2 SV=1 - [F5H850_HUMAN]	0	0	0	0	0	0.978129	0	0	0.326043	0.564723	0.211325
F5H8D7	DNA repair protein XRCC1 OS=Homo sapiens GN=XRCC1 PE=2 SV=1 - [F5H8D7_HUMAN]	0	0	0	0	0	0	1.93411	0.949037	0.961049	0.967111	0.113678
F5H8E6	WD repeat-containing protein 20 OS=Homo sapiens GN=WDR20 PE=2 SV=1 - [F5H8E6_HUMAN]	0	0	0	0	0	0	0	0.949037	0.316346	0.547927	0.211325
F5H8F7	Set1/Ash2 histone methyltransferase complex subunit ASH2 OS=Homo sapiens GN=ASH2L PE=2 SV=1 - [F5H8F7_HUMAN]	0	0	0	0	0	0.978129	0	0.949037	0.642389	0.556515	0.0917982
F6RTM7	Syntaxin-10 OS=Homo sapiens GN=STX10 PE=4 SV=1 - [F6RTM7_HUMAN]	0	0	0	0	0	0	0.967055	0	0.322352	0.55833	0.211325
F6SKP1	Transmembrane glycoprotein NMB OS=Homo sapiens GN=GPNMB PE=4 SV=1 - [F6SKP1_HUMAN]	0	0	0	0	0	1.95626	1.93411	1.89807	1.92948	0.0293673	3.86052e-05
F8VPC8	BTB/POZ domain-containing protein 6 (Fragment) OS=Homo sapiens GN=BTBD6 PE=2 SV=1 - [F8VPC8_HUMAN]	0	0	0	0	0	0	0	0.949037	0.316346	0.547927	0.211325
F8VPF7	Voltage-gated hydrogen channel 1 OS=Homo sapiens GN=HVCN1 PE=2 SV=1 - [F8VPF7_HUMAN]	0	0	0	0	0	0	0	1.89807	0.632691	1.09585	0.211325
F8VQE1	LIM domain and actin-binding protein 1 OS=Homo sapiens GN=LIMA1 PE=2 SV=1 - [F8VQE1_HUMAN]	0	0	0	0	0	0	18.3741	0	6.12468	10.6083	0.211325
F8VQY8	Anaphase-promoting complex subunit 7 (Fragment) OS=Homo sapiens GN=ANAPC7 PE=2 SV=1 - [F8VQY8_HUMAN]	0	0	0	0	0	0.978129	0	0	0.326043	0.564723	0.211325
F8VRU3	Glutamyl-tRNA(Gln) amidotransferase subunit C, mitochondrial OS=Homo sapiens GN=GATC PE=2 SV=1 - [F8VRU3_HUMAN]	0	0	0	0	0	0.978129	1.93411	0	0.970747	0.967076	0.112116
F8VTR4	YEATS domain-containing protein 4 (Fragment) OS=Homo sapiens GN=YEATS4 PE=2 SV=1 - [F8VTR4_HUMAN]	0	0	0	0	0	0.978129	0	0	0.326043	0.564723	0.211325
F8VU51	YLP motif-containing protein 1 OS=Homo sapiens GN=YLPM1 PE=2 SV=1 - [F8VU51_HUMAN]	0	0	0	0	0	0.978129	0	0.949037	0.642389	0.556515	0.0917982
F8VUA2	Charged multivesicular body protein 1a OS=Homo sapiens GN=CHMP1A PE=2 SV=1 - [F8VUA2_HUMAN]	0	0	0	0	0	0	0.967055	0	0.322352	0.55833	0.211325
F8VV35	D-amino-acid oxidase (Fragment) OS=Homo sapiens GN=DAO PE=2 SV=1 - [F8VV35_HUMAN]	0	0	0	0	0	1.95626	0.967055	2.84711	1.92347	0.940456	0.035636
F8VVI6	Carboxypeptidase M (Fragment) OS=Homo sapiens GN=CPM PE=2 SV=1 - [F8VVI6_HUMAN]	0	0	0	0	0	0	0	0.949037	0.316346	0.547927	0.211325
F8VVX6	2-methoxy-6-polyprenyl-1,4-benzoquinol methylase, mitochondrial (Fragment) OS=Homo sapiens GN=COQ5 PE=2 SV=1 - [F8VVX6_HUMAN]	0	0	0	0	0	0	5.80233	0	1.93411	3.34998	0.211325
F8VW95	SWI/SNF-related matrix-associated actin-dependent regulator of chromatin subfamily D member 1 (Fragment) OS=Homo sapiens GN=SMARCD1 PE=2 SV=1 - [F8VW95_HUMAN]	0	0	0	0	0	0	0.967055	0	0.322352	0.55833	0.211325
F8VWK9	2'-5'-oligoadenylate synthase 3 OS=Homo sapiens GN=OAS3 PE=2 SV=1 - [F8VWK9_HUMAN]	0	0	0	0	0	0	0.967055	0	0.322352	0.55833	0.211325
F8VX11	Eukaryotic translation initiation factor 4B (Fragment) OS=Homo sapiens GN=EIF4B PE=2 SV=1 - [F8VX11_HUMAN]	0	0	0	0	0	0	0.967055	0	0.322352	0.55833	0.211325
F8VX16	Sodium-dependent neutral amino acid transporter B(0)AT2 (Fragment) OS=Homo sapiens GN=SLC6A15 PE=2 SV=1 - [F8VX16_HUMAN]	0	0	0	0	0	0	0.967055	0	0.322352	0.55833	0.211325
F8VXB0	Amyloid-like protein 2 OS=Homo sapiens GN=APPL2 PE=2 SV=1 - [F8VXB0_HUMAN]	0	0	0	0	0	0	0.967055	0.949037	0.638697	0.553201	0.0917698
F8VXL2	Dynein light chain 1, cytoplasmic OS=Homo sapiens GN=DYNLL1 PE=2 SV=1 - [F8VXL2_HUMAN]	0	0	0	0	0	0.978129	0	0.949037	0.642389	0.556515	0.0917982
F8VXL4	Ankyrin repeat domain-containing protein 13A (Fragment) OS=Homo sapiens GN=ANKRD13A PE=2 SV=1 - [F8VXL4_HUMAN]	0	0	0	0	0	1.95626	0	2.84711	1.60112	1.4564	0.0985969
F8VXS0	L-serine dehydratase/L-threonine deaminase (Fragment) OS=Homo sapiens GN=SDS PE=4 SV=1 - [F8VXS0_HUMAN]	0	0	0	0	0	0	0.967055	0	0.322352	0.55833	0.211325
F8W061	Iron-sulfur protein NUBPL (Fragment) OS=Homo sapiens GN=NUBPL PE=2 SV=1 - [F8W061_HUMAN]	0	0	0	0	0	0.978129	0	0	0.326043	0.564723	0.211325
F8W0J4	YEATS domain-containing protein 4 OS=Homo sapiens GN=YEATS4 PE=2 SV=1 - [F8W0J4_HUMAN]	0	0	0	0	0	0	0	0.949037	0.316346	0.547927	0.211325
F8W0R2	Protein OS-9 OS=Homo sapiens GN=OS9 PE=2 SV=1 - [F8W0R2_HUMAN]	0	0	0	0	0	0	0.967055	0	0.322352	0.55833	0.211325
F8W1B7	Matrix metalloproteinase-14 (Fragment) OS=Homo sapiens GN=MMP14 PE=2 SV=1 - [F8W1B7_HUMAN]	0	0	0	0	0	0	0.967055	0	0.322352	0.55833	0.211325
F8W1G6	Poly(rC)-binding protein 2 (Fragment) OS=Homo sapiens GN=PCBP2 PE=2 SV=2 - [F8W1G6_HUMAN]	0	0	0	0	0	0	0	11.3884	3.79615	6.57512	0.211325
F8W1Y8	Liprin-alpha-2 (Fragment) OS=Homo sapiens GN=PPFIA2 PE=2 SV=1 - [F8W1Y8_HUMAN]	0	0	0	0	0	0	0	0.949037	0.316346	0.547927	0.211325
F8W6X8	Ras GTPase-activating protein 3 OS=Homo sapiens GN=RASA3 PE=2 SV=1 - [F8W6X8_HUMAN]	0	0	0	0	0	0	0.967055	0.949037	0.638697	0.553201	0.0917698
F8W6X9	Protein sidekick-1 OS=Homo sapiens GN=SDK1 PE=2 SV=1 - [F8W6X9_HUMAN]	0	0	0	0	0	0	0.967055	0	0.322352	0.55833	0.211325
F8W7E6	Sodium bicarbonate cotransporter 3 OS=Homo sapiens GN=SLC4A7 PE=2 SV=1 - [F8W7E6_HUMAN]	0	0	0	0	0	0.978129	0	0	0.326043	0.564723	0.211325
F8W810	Uncharacterized protein OS=Homo sapiens PE=2 SV=1 - [F8W810_HUMAN]	0	0	0	0	0	0	0	0.949037	0.316346	0.547927	0.211325
F8W853	Cytoplasmic dynein 2 light intermediate chain 1 OS=Homo sapiens GN=DYNC2LI1 PE=2 SV=1 - [F8W853_HUMAN]	0	0	0	0	0	0	0	0.949037	0.316346	0.547927	0.211325
F8W883	Unconventional myosin-XVI OS=Homo sapiens GN=MYO16 PE=2 SV=1 - [F8W883_HUMAN]	0	0	0	0	0	0	0	0.949037	0.316346	0.547927	0.211325
F8W8H5	Ras-related protein Rab-24 OS=Homo sapiens GN=RAB24 PE=2 SV=1 - [F8W8H5_HUMAN]	0	0	0	0	0	1.95626	0	0	0.652086	1.12945	0.211325
F8W8V9	Kinesin-like protein KIF1A (Fragment) OS=Homo sapiens GN=KIF1A PE=2 SV=1 - [F8W8V9_HUMAN]	0	0	0	0	0	0	0	2.84711	0.949037	1.64378	0.211325
F8W8Z4	E3 ubiquitin-protein ligase BRE1B OS=Homo sapiens GN=RNF40 PE=2 SV=1 - [F8W8Z4_HUMAN]	0	0	0	0	0	0	0	0.949037	0.316346	0.547927	0.211325
F8W9T3	Sorting nexin-4 (Fragment) OS=Homo sapiens GN=SNX4 PE=2 SV=1 - [F8W9T3_HUMAN]	0	0	0	0	0	4.89065	0	4.74518	3.21194	2.78257	0.0917982
F8WAS1	Anaphase-promoting complex subunit 1 OS=Homo sapiens GN=ANAPC1 PE=2 SV=1 - [F8WAS1_HUMAN]	0	0	0	0	0	1.95626	0	0	0.652086	1.12945	0.211325
F8WAS3	NADH dehydrogenase [ubiquinone] 1 alpha subcomplex subunit 5 OS=Homo sapiens GN=NDUFA5 PE=2 SV=1 - [F8WAS3_HUMAN]	0	0	0	0	0	5.86877	0	0	1.95626	3.38834	0.211325
F8WAU4	Elongation factor G, mitochondrial OS=Homo sapiens GN=GFM1 PE=2 SV=1 - [F8WAU4_HUMAN]	0	0	0	0	0	0	0	2.84711	0.949037	1.64378	0.211325
F8WBG1	Integrator complex subunit 6 OS=Homo sapiens GN=INTS6 PE=2 SV=1 - [F8WBG1_HUMAN]	0	0	0	0	0	0.978129	0.967055	0.949037	0.96474	0.0146837	3.86052e-05
F8WBH6	Sideroflexin-5 OS=Homo sapiens GN=SFXN5 PE=2 SV=1 - [F8WBH6_HUMAN]	0	0	0	0	0	0	0	0.949037	0.316346	0.547927	0.211325
F8WBL2	Bystin OS=Homo sapiens GN=BYSL PE=2 SV=1 - [F8WBL2_HUMAN]	0	0	0	0	0	0	0.967055	0	0.322352	0.55833	0.211325
F8WC07	Leukocyte-associated immunoglobulin-like receptor 1 OS=Homo sapiens GN=LAIR1 PE=2 SV=1 - [F8WC07_HUMAN]	0	0	0	0	0	0.978129	0	2.84711	1.27508	1.4466	0.133193
F8WC99	OX-2 membrane glycoprotein OS=Homo sapiens GN=CD200 PE=2 SV=1 - [F8WC99_HUMAN]	0	0	0	0	0	0.978129	0	0	0.326043	0.564723	0.211325
F8WCG6	Potassium voltage-gated channel subfamily H member 8 OS=Homo sapiens GN=KCNH8 PE=2 SV=1 - [F8WCG6_HUMAN]	0	0	0	0	0	0	0	0.949037	0.316346	0.547927	0.211325
F8WCM7	Thiamin pyrophosphokinase 1 OS=Homo sapiens GN=TPK1 PE=2 SV=1 - [F8WCM7_HUMAN]	0	0	0	0	0	0	0.967055	0	0.322352	0.55833	0.211325
F8WDJ2	Rab3 GTPase-activating protein non-catalytic subunit OS=Homo sapiens GN=RAB3GAP2 PE=2 SV=1 - [F8WDJ2_HUMAN]	0	0	0	0	0	0	0	0.949037	0.316346	0.547927	0.211325
F8WDR2	tRNA (adenine(58)-N(1))-methyltransferase, mitochondrial OS=Homo sapiens GN=TRMT61B PE=2 SV=1 - [F8WDR2_HUMAN]	0	0	0	0	0	0	0	0.949037	0.316346	0.547927	0.211325
F8WDS8	Protein TSSC1 OS=Homo sapiens GN=TSSC1 PE=2 SV=1 - [F8WDS8_HUMAN]	0	0	0	0	0	0	1.93411	0	0.644704	1.11666	0.211325
F8WDT8	Probable ATP-dependent RNA helicase DDX56 OS=Homo sapiens GN=DDX56 PE=2 SV=1 - [F8WDT8_HUMAN]	0	0	0	0	0	0	0.967055	0.949037	0.638697	0.553201	0.0917698
F8WDU3	DNA-binding protein RFX5 OS=Homo sapiens GN=RFX5 PE=2 SV=1 - [F8WDU3_HUMAN]	0	0	0	0	0	0	0.967055	0	0.322352	0.55833	0.211325
F8WDZ1	Proline-, glutamic acid- and leucine-rich protein 1 OS=Homo sapiens GN=PELP1 PE=2 SV=1 - [F8WDZ1_HUMAN]	0	0	0	0	0	4.89065	0	0	1.63022	2.82362	0.211325
F8WE28	Nuclease EXOG, mitochondrial OS=Homo sapiens GN=EXOG PE=2 SV=1 - [F8WE28_HUMAN]	0	0	0	0	0	1.95626	0	0	0.652086	1.12945	0.211325
F8WE49	E3 ubiquitin-protein ligase RAD18 OS=Homo sapiens GN=RAD18 PE=2 SV=1 - [F8WE49_HUMAN]	0	0	0	0	0	0	0.967055	0	0.322352	0.55833	0.211325
F8WE53	Lysine ketoglutarate reductase OS=Homo sapiens GN=AASS PE=2 SV=1 - [F8WE53_HUMAN]	0	0	0	0	0	0	0.967055	0	0.322352	0.55833	0.211325
F8WE68	Protein FAM134A OS=Homo sapiens GN=FAM134A PE=2 SV=1 - [F8WE68_HUMAN]	0	0	0	0	0	0	0.967055	0	0.322352	0.55833	0.211325
F8WEV0	Acyl-CoA dehydrogenase family member 11 OS=Homo sapiens GN=ACAD11 PE=2 SV=1 - [F8WEV0_HUMAN]	0	0	0	0	0	0	0.967055	0	0.322352	0.55833	0.211325
G3V0E5	Transferrin receptor (P90, CD71), isoform CRA_c OS=Homo sapiens GN=TFRC PE=4 SV=1 - [G3V0E5_HUMAN]	0	0	0	0	0	0	0	2.84711	0.949037	1.64378	0.211325
G3V126	ATPase, H+ transporting, lysosomal 50/57kDa, V1 subunit H, isoform CRA_c OS=Homo sapiens GN=ATP6V1H PE=4 SV=1 - [G3V126_HUMAN]	0	0	0	0	0	0	1.93411	0	0.644704	1.11666	0.211325
G3V1A0	HCG38438, isoform CRA_b OS=Homo sapiens GN=TRAPPC4 PE=4 SV=1 - [G3V1A0_HUMAN]	0	0	0	0	0	0	0	0.949037	0.316346	0.547927	0.211325
G3V1Q8	Serine/threonine-protein kinase TAO3 OS=Homo sapiens GN=TAOK3 PE=4 SV=1 - [G3V1Q8_HUMAN]	0	0	0	0	0	0	0	1.89807	0.632691	1.09585	0.211325
G3V1R7	Solute carrier family 27 (Fatty acid transporter), member 2, isoform CRA_b OS=Homo sapiens GN=SLC27A2 PE=4 SV=1 - [G3V1R7_HUMAN]	0	0	0	0	0	0	0	0.949037	0.316346	0.547927	0.211325
G3V1S6	Polypeptide N-acetylgalactosaminyltransferase 2 soluble form OS=Homo sapiens GN=GALNT2 PE=3 SV=1 - [G3V1S6_HUMAN]	0	0	0	0	0	2.93439	2.90117	2.84711	2.89422	0.044051	3.86052e-05
G3V1U3	Methionine aminopeptidase OS=Homo sapiens GN=METAP2 PE=3 SV=1 - [G3V1U3_HUMAN]	0	0	0	0	0	0	1.93411	0	0.644704	1.11666	0.211325
G3V1Y1	ARP6 actin-related protein 6 homolog (Yeast), isoform CRA_d OS=Homo sapiens GN=ACTR6 PE=3 SV=1 - [G3V1Y1_HUMAN]	0	0	0	0	0	0	0.967055	0	0.322352	0.55833	0.211325
G3V288	Prostaglandin reductase 2 (Fragment) OS=Homo sapiens GN=PTGR2 PE=2 SV=1 - [G3V288_HUMAN]	0	0	0	0	0	0	0	1.89807	0.632691	1.09585	0.211325
G3V2B8	C-1-tetrahydrofolate synthase, cytoplasmic OS=Homo sapiens GN=MTHFD1 PE=2 SV=1 - [G3V2B8_HUMAN]	0	0	0	0	0	36.1908	0	36.0634	24.0847	20.8581	0.0917523
G3V2H1	MAGUK p55 subfamily member 5 (Fragment) OS=Homo sapiens GN=MPP5 PE=2 SV=1 - [G3V2H1_HUMAN]	0	0	0	0	0	2.93439	1.93411	2.84711	2.57187	0.554036	0.00755946
G3V2L5	Ubiquinone biosynthesis monooxygenase COQ6 OS=Homo sapiens GN=COQ6 PE=2 SV=1 - [G3V2L5_HUMAN]	0	0	0	0	0	0	0	0.949037	0.316346	0.547927	0.211325
G3V2S6	V-type proton ATPase subunit D OS=Homo sapiens GN=ATP6V1D PE=2 SV=1 - [G3V2S6_HUMAN]	0	0	0	0	0	10.7594	11.6047	7.59229	9.98546	2.11519	0.00731476
G3V3D8	Calmin OS=Homo sapiens GN=CLMN PE=2 SV=1 - [G3V3D8_HUMAN]	0	0	0	0	0	0.978129	1.93411	0.949037	1.28709	0.560523	0.0288964
G3V3R5	Brain-enriched guanylate kinase-associated protein OS=Homo sapiens GN=BEGAIN PE=4 SV=1 - [G3V3R5_HUMAN]	0	0	0	0	0	0	0	0.949037	0.316346	0.547927	0.211325
G3V445	Probable tRNA threonylcarbamoyladenosine biosynthesis protein OSGEP (Fragment) OS=Homo sapiens GN=OSGEP PE=2 SV=1 - [G3V445_HUMAN]	0	0	0	0	0	0	0	0.949037	0.316346	0.547927	0.211325
G3V4F2	Acyl-coenzyme A thioesterase 1 OS=Homo sapiens GN=ACOT1 PE=2 SV=1 - [G3V4F2_HUMAN]	0	0	0	0	0	7.82503	8.7035	0	5.50951	4.79155	0.0923271
G3V4G9	Uncharacterized protein (Fragment) OS=Homo sapiens PE=2 SV=1 - [G3V4G9_HUMAN]	0	0	0	0	0	0.978129	0	0	0.326043	0.564723	0.211325
G3V4I0	Ectonucleoside triphosphate diphosphohydrolase 5 OS=Homo sapiens GN=ENTPD5 PE=3 SV=1 - [G3V4I0_HUMAN]	0	0	0	0	0	0	4.83528	0	1.61176	2.79165	0.211325
G3V4M2	Galactocerebrosidase OS=Homo sapiens GN=GALC PE=2 SV=1 - [G3V4M2_HUMAN]	0	0	0	0	0	0	0	0.949037	0.316346	0.547927	0.211325
G3V4P9	Mitogen-activated protein kinase kinase kinase 9 OS=Homo sapiens GN=MAP3K9 PE=2 SV=1 - [G3V4P9_HUMAN]	0	0	0	0	0	0.978129	0	0	0.326043	0.564723	0.211325
G3V4S9	Protein NDRG2 (Fragment) OS=Homo sapiens GN=NDRG2 PE=2 SV=1 - [G3V4S9_HUMAN]	0	0	0	0	0	0	3.86822	0	1.28941	2.23332	0.211325
G3V4V5	E3 ubiquitin-protein ligase HECTD1 (Fragment) OS=Homo sapiens GN=HECTD1 PE=2 SV=1 - [G3V4V5_HUMAN]	0	0	0	0	0	0	0.967055	0	0.322352	0.55833	0.211325
G3V4X8	SNW domain-containing protein 1 OS=Homo sapiens GN=SNW1 PE=2 SV=1 - [G3V4X8_HUMAN]	0	0	0	0	0	1.95626	1.93411	3.79615	2.56217	1.06871	0.0266959
G3V511	Latent-transforming growth factor beta-binding protein 2 OS=Homo sapiens GN=LTBP2 PE=2 SV=1 - [G3V511_HUMAN]	0	0	0	0	0	4.89065	5.80233	4.74518	5.14605	0.572988	0.00205357
G3V520	Protein kinase C eta type (Fragment) OS=Homo sapiens GN=PRKCH PE=2 SV=1 - [G3V520_HUMAN]	0	0	0	0	0	0	0.967055	0.949037	0.638697	0.553201	0.0917698
G3V529	ATP-dependent RNA helicase DDX24 OS=Homo sapiens GN=DDX24 PE=2 SV=1 - [G3V529_HUMAN]	0	0	0	0	0	0	1.93411	0	0.644704	1.11666	0.211325
G3V582	Molybdopterin molybdenumtransferase OS=Homo sapiens GN=GPHN PE=2 SV=1 - [G3V582_HUMAN]	0	0	0	0	0	0.978129	1.93411	1.89807	1.60344	0.541833	0.0180096
G3V5I6	Zinc finger CCCH domain-containing protein 14 OS=Homo sapiens GN=ZC3H14 PE=2 SV=1 - [G3V5I6_HUMAN]	0	0	0	0	0	0.978129	0	0.949037	0.642389	0.556515	0.0917982
G3V5K4	Protein FAM181A (Fragment) OS=Homo sapiens GN=FAM181A PE=2 SV=1 - [G3V5K4_HUMAN]	0	0	0	0	0	0.978129	0.967055	0	0.648395	0.561554	0.0917583
G3XAB3	Tetratricopeptide repeat domain 17, isoform CRA_c OS=Homo sapiens GN=TTC17 PE=4 SV=1 - [G3XAB3_HUMAN]	0	0	0	0	0	0.978129	0	0	0.326043	0.564723	0.211325
G3XAN4	Nuclear receptor coactivator 3 OS=Homo sapiens GN=TRAM1 PE=4 SV=1 - [G3XAN4_HUMAN]	0	0	0	0	0	0	0	0.949037	0.316346	0.547927	0.211325
G5E9A6	Ubiquitin carboxyl-terminal hydrolase OS=Homo sapiens GN=USP11 PE=3 SV=1 - [G5E9A6_HUMAN]	0	0	0	0	0	0.978129	0	0	0.326043	0.564723	0.211325
G5E9F8	Protein S (Alpha), isoform CRA_b OS=Homo sapiens GN=PROS1 PE=4 SV=1 - [G5E9F8_HUMAN]	0	0	0	0	0	0.978129	0	0.949037	0.642389	0.556515	0.0917982
G5E9Q7	HCG2004980, isoform CRA_d OS=Homo sapiens GN=IDH3G PE=3 SV=1 - [G5E9Q7_HUMAN]	0	0	0	0	0	1.95626	0	0	0.652086	1.12945	0.211325
G5E9U9	Poly (ADP-ribose) polymerase family, member 12, isoform CRA_a OS=Homo sapiens GN=PARP12 PE=4 SV=1 - [G5E9U9_HUMAN]	0	0	0	0	0	0.978129	0	0	0.326043	0.564723	0.211325
G5E9Z2	Cisplatin resistance related protein CRR9p, isoform CRA_c OS=Homo sapiens GN=CLPTM1L PE=4 SV=1 - [G5E9Z2_HUMAN]	0	0	0	0	0	0	0	0.949037	0.316346	0.547927	0.211325
G8JLC6	Melanoma inhibitory activity protein 3 OS=Homo sapiens GN=MIA3 PE=2 SV=1 - [G8JLC6_HUMAN]	0	0	0	0	0	15.6501	0	12.3375	9.32918	8.24733	0.0945816
G8JLI6	Prolyl 3-hydroxylase 3 OS=Homo sapiens GN=LEPREL2 PE=2 SV=1 - [G8JLI6_HUMAN]	0	0	0	0	0	0.978129	0.967055	0.949037	0.96474	0.0146837	3.86052e-05
H0Y2X1	Chromosome 17 open reading frame 62, isoform CRA_c OS=Homo sapiens GN=C17orf62 PE=4 SV=1 - [H0Y2X1_HUMAN]	0	0	0	0	0	0	0.967055	0	0.322352	0.55833	0.211325
H0Y2Y8	Zyxin (Fragment) OS=Homo sapiens GN=ZYX PE=2 SV=1 - [H0Y2Y8_HUMAN]	0	0	0	0	0	4.89065	4.83528	8.54133	6.08908	2.12389	0.0191216
H0Y337	Utrophin (Fragment) OS=Homo sapiens GN=UTRN PE=4 SV=1 - [H0Y337_HUMAN]	0	0	0	0	0	0.978129	0	0	0.326043	0.564723	0.211325
H0Y3A8	Astrotactin-2 (Fragment) OS=Homo sapiens GN=ASTN2 PE=2 SV=1 - [H0Y3A8_HUMAN]	0	0	0	0	0	0	0	0.949037	0.316346	0.547927	0.211325
H0Y424	LIM domain only protein 7 (Fragment) OS=Homo sapiens GN=LMO7 PE=4 SV=1 - [H0Y424_HUMAN]	0	0	0	0	0	0.978129	0	0	0.326043	0.564723	0.211325
H0Y496	Sorting nexin-33 (Fragment) OS=Homo sapiens GN=SNX30 PE=4 SV=1 - [H0Y496_HUMAN]	0	0	0	0	0	0	0.967055	0	0.322352	0.55833	0.211325
H0Y4C0	Nesprin-1 (Fragment) OS=Homo sapiens GN=SYNE1 PE=4 SV=1 - [H0Y4C0_HUMAN]	0	0	0	0	0	0	0	4.74518	1.58173	2.73963	0.211325
H0Y4C3	SLIT-ROBO Rho GTPase-activating protein 2 OS=Homo sapiens GN=SRGAP2 PE=2 SV=1 - [H0Y4C3_HUMAN]	0	0	0	0	0	0	0	1.89807	0.632691	1.09585	0.211325
H0Y5R2	Centrosome-associated protein CEP250 (Fragment) OS=Homo sapiens GN=CEP250 PE=4 SV=1 - [H0Y5R2_HUMAN]	0	0	0	0	0	0	0.967055	0	0.322352	0.55833	0.211325
H0Y5T1	CLIP-associating protein 1 (Fragment) OS=Homo sapiens GN=CLASP1 PE=4 SV=1 - [H0Y5T1_HUMAN]	0	0	0	0	0	0	0	0.949037	0.316346	0.547927	0.211325
H0Y621	Endoplasmic reticulum-Golgi intermediate compartment protein 3 (Fragment) OS=Homo sapiens GN=ERGIC3 PE=4 SV=1 - [H0Y621_HUMAN]	0	0	0	0	0	1.95626	1.93411	1.89807	1.92948	0.0293673	3.86052e-05
H0Y668	Tenascin-R (Fragment) OS=Homo sapiens GN=TNR PE=4 SV=1 - [H0Y668_HUMAN]	0	0	0	0	0	0	0	0.949037	0.316346	0.547927	0.211325
H0Y6C3	Pyrroline-5-carboxylate reductase 3 (Fragment) OS=Homo sapiens GN=PYCRL PE=2 SV=1 - [H0Y6C3_HUMAN]	0	0	0	0	0	0	2.90117	0	0.967055	1.67499	0.211325
H0Y6D8	TATA-box-binding protein (Fragment) OS=Homo sapiens GN=TBP PE=4 SV=1 - [H0Y6D8_HUMAN]	0	0	0	0	0	0	0.967055	0.949037	0.638697	0.553201	0.0917698
H0Y6T6	Nurim (Fragment) OS=Homo sapiens GN=NRM PE=4 SV=1 - [H0Y6T6_HUMAN]	0	0	0	0	0	0	0	1.89807	0.632691	1.09585	0.211325
H0Y718	Kinesin-like protein KIF6 (Fragment) OS=Homo sapiens GN=KIF6 PE=3 SV=1 - [H0Y718_HUMAN]	0	0	0	0	0	0	0.967055	0	0.322352	0.55833	0.211325
H0Y7F0	DNA-directed RNA polymerase I subunit RPA34 (Fragment) OS=Homo sapiens GN=CAST PE=4 SV=1 - [H0Y7F0_HUMAN]	0	0	0	0	0	0	0	1.89807	0.632691	1.09585	0.211325
H0Y7V4	Dynein heavy chain 8, axonemal OS=Homo sapiens GN=DNAH8 PE=2 SV=1 - [H0Y7V4_HUMAN]	0	0	0	0	0	0	0	0.949037	0.316346	0.547927	0.211325
H0Y7Z8	Probable ATP-dependent RNA helicase DDX59 (Fragment) OS=Homo sapiens GN=DDX59 PE=4 SV=1 - [H0Y7Z8_HUMAN]	0	0	0	0	0	0.978129	0	0	0.326043	0.564723	0.211325
H0Y8F4	GRB2-associated-binding protein 1 (Fragment) OS=Homo sapiens GN=GAB1 PE=4 SV=1 - [H0Y8F4_HUMAN]	0	0	0	0	0	0	0	0.949037	0.316346	0.547927	0.211325
H0Y8H9	Cullin-9 (Fragment) OS=Homo sapiens GN=CUL9 PE=2 SV=1 - [H0Y8H9_HUMAN]	0	0	0	0	0	0	0	0.949037	0.316346	0.547927	0.211325
H0Y8U3	Superkiller viralicidic activity 2-like 2 (Fragment) OS=Homo sapiens GN=SKIV2L2 PE=4 SV=1 - [H0Y8U3_HUMAN]	0	0	0	0	0	0	0.967055	0	0.322352	0.55833	0.211325
H0Y8X7	Coatomer subunit gamma-1 (Fragment) OS=Homo sapiens GN=COPG1 PE=4 SV=1 - [H0Y8X7_HUMAN]	0	0	0	0	0	2.93439	0	0	0.978129	1.69417	0.211325
H0Y932	SRSF protein kinase 1 (Fragment) OS=Homo sapiens GN=SRPK1 PE=2 SV=1 - [H0Y932_HUMAN]	0	0	0	0	0	0	0	0.949037	0.316346	0.547927	0.211325
H0Y950	ADP-ribosyl cyclase 1 (Fragment) OS=Homo sapiens GN=CD38 PE=2 SV=1 - [H0Y950_HUMAN]	0	0	0	0	0	0	0.967055	0.949037	0.638697	0.553201	0.0917698
H0Y9B0	Ufm1-specific protease 2 (Fragment) OS=Homo sapiens GN=UFSP2 PE=4 SV=1 - [H0Y9B0_HUMAN]	0	0	0	0	0	0	1.93411	0	0.644704	1.11666	0.211325
H0Y9E4	Pantothenate kinase 4 (Fragment) OS=Homo sapiens GN=PANK4 PE=2 SV=1 - [H0Y9E4_HUMAN]	0	0	0	0	0	0	0	0.949037	0.316346	0.547927	0.211325
H0Y9U7	Long-chain-fatty-acid--CoA ligase 1 (Fragment) OS=Homo sapiens GN=ACSL1 PE=2 SV=1 - [H0Y9U7_HUMAN]	0	0	0	0	0	3.91252	0	0	1.30417	2.25889	0.211325
H0Y9Y3	Synaptopodin-2 (Fragment) OS=Homo sapiens GN=SYNPO2 PE=4 SV=1 - [H0Y9Y3_HUMAN]	0	0	0	0	0	34.2345	31.9128	45.5538	37.2337	7.2983	0.00628308
H0YAA5	Androgen-dependent TFPI-regulating protein (Fragment) OS=Homo sapiens GN=ADTRP PE=2 SV=1 - [H0YAA5_HUMAN]	0	0	0	0	0	0.978129	0	0.949037	0.642389	0.556515	0.0917982
H0YAE9	Uncharacterized protein (Fragment) OS=Homo sapiens PE=3 SV=1 - [H0YAE9_HUMAN]	0	0	0	0	0	4.89065	1.93411	3.79615	3.5403	1.49478	0.0273007
H0YAH0	Protocadherin-7 (Fragment) OS=Homo sapiens GN=PCDH7 PE=4 SV=1 - [H0YAH0_HUMAN]	0	0	0	0	0	0	0.967055	0	0.322352	0.55833	0.211325
H0YAW0	Transient receptor potential cation channel subfamily A member 1 (Fragment) OS=Homo sapiens GN=TRPA1 PE=2 SV=1 - [H0YAW0_HUMAN]	0	0	0	0	0	0	0.967055	0	0.322352	0.55833	0.211325
H0YBD4	Glutathione reductase, mitochondrial (Fragment) OS=Homo sapiens GN=GSR PE=4 SV=1 - [H0YBD4_HUMAN]	0	0	0	0	0	0	1.93411	0	0.644704	1.11666	0.211325
H0YBG5	Protein Spindly (Fragment) OS=Homo sapiens GN=SPDL1 PE=4 SV=1 - [H0YBG5_HUMAN]	0	0	0	0	0	0.978129	0	0	0.326043	0.564723	0.211325
H0YBI8	Vascular endothelial growth factor A (Fragment) OS=Homo sapiens GN=VEGFA PE=2 SV=1 - [H0YBI8_HUMAN]	0	0	0	0	0	0.978129	0	0.949037	0.642389	0.556515	0.0917982
H0YBU8	39S ribosomal protein L43, mitochondrial (Fragment) OS=Homo sapiens GN=MRPL43 PE=4 SV=1 - [H0YBU8_HUMAN]	0	0	0	0	0	0	0	4.74518	1.58173	2.73963	0.211325
H0YBV6	Protein MAK16 homolog (Fragment) OS=Homo sapiens GN=MAK16 PE=4 SV=1 - [H0YBV6_HUMAN]	0	0	0	0	0	0	0.967055	0	0.322352	0.55833	0.211325
H0YBY9	Arf-GAP with SH3 domain, ANK repeat and PH domain-containing protein 1 (Fragment) OS=Homo sapiens GN=ASAP1 PE=2 SV=1 - [H0YBY9_HUMAN]	0	0	0	0	0	0.978129	0	0	0.326043	0.564723	0.211325
H0YC83	H/ACA ribonucleoprotein complex subunit 2 (Fragment) OS=Homo sapiens GN=NHP2 PE=2 SV=1 - [H0YC83_HUMAN]	0	0	0	0	0	1.95626	0	0	0.652086	1.12945	0.211325
H0YCI3	Yorkie homolog (Fragment) OS=Homo sapiens GN=YAP1 PE=4 SV=1 - [H0YCI3_HUMAN]	0	0	0	0	0	0.978129	0.967055	0	0.648395	0.561554	0.0917583
H0YCS7	7-dehydrocholesterol reductase (Fragment) OS=Homo sapiens GN=DHCR7 PE=4 SV=1 - [H0YCS7_HUMAN]	0	0	0	0	0	0	0.967055	0	0.322352	0.55833	0.211325
H0YCV2	DNA polymerase subunit gamma-1 (Fragment) OS=Homo sapiens GN=POLG PE=2 SV=1 - [H0YCV2_HUMAN]	0	0	0	0	0	0.978129	0	0	0.326043	0.564723	0.211325
H0YDG9	Remodeling and spacing factor 1 (Fragment) OS=Homo sapiens GN=RSF1 PE=2 SV=1 - [H0YDG9_HUMAN]	0	0	0	0	0	0	0	0.949037	0.316346	0.547927	0.211325
H0YDJ3	Serine/threonine-protein kinase PRP4 homolog (Fragment) OS=Homo sapiens GN=PRPF4B PE=2 SV=1 - [H0YDJ3_HUMAN]	0	0	0	0	0	0.978129	0	1.89807	0.958734	0.949185	0.111157
H0YDK8	Pumilio homolog 1 (Fragment) OS=Homo sapiens GN=PUM1 PE=4 SV=1 - [H0YDK8_HUMAN]	0	0	0	0	0	0.978129	0	0	0.326043	0.564723	0.211325
H0YDP9	Receptor-type tyrosine-protein phosphatase kappa (Fragment) OS=Homo sapiens GN=PTPRK PE=4 SV=1 - [H0YDP9_HUMAN]	0	0	0	0	0	0.978129	1.93411	1.89807	1.60344	0.541833	0.0180096
H0YDS0	Ubiquilin-1 (Fragment) OS=Homo sapiens GN=UBQLN1 PE=2 SV=1 - [H0YDS0_HUMAN]	0	0	0	0	0	0	0	1.89807	0.632691	1.09585	0.211325
H0YDZ9	EH domain-binding protein 1-like protein 1 (Fragment) OS=Homo sapiens GN=EHBP1L1 PE=4 SV=1 - [H0YDZ9_HUMAN]	0	0	0	0	0	0	0	0.949037	0.316346	0.547927	0.211325
H0YE35	Synembryn-A (Fragment) OS=Homo sapiens GN=RIC8A PE=4 SV=1 - [H0YE35_HUMAN]	0	0	0	0	0	0	0.967055	0	0.322352	0.55833	0.211325
H0YE51	Methionine-R-sulfoxide reductase B2, mitochondrial (Fragment) OS=Homo sapiens GN=MSRB2 PE=4 SV=1 - [H0YE51_HUMAN]	0	0	0	0	0	4.89065	0	0	1.63022	2.82362	0.211325
H0YEN6	Delta(14)-sterol reductase (Fragment) OS=Homo sapiens GN=TM7SF2 PE=4 SV=1 - [H0YEN6_HUMAN]	0	0	0	0	0	0	0	0.949037	0.316346	0.547927	0.211325
H0YER1	Remodeling and spacing factor 1 (Fragment) OS=Homo sapiens GN=RSF1 PE=2 SV=1 - [H0YER1_HUMAN]	0	0	0	0	0	0.978129	0	0	0.326043	0.564723	0.211325
H0YES2	DEP domain-containing protein 1A (Fragment) OS=Homo sapiens GN=DEPDC1 PE=4 SV=1 - [H0YES2_HUMAN]	0	0	0	0	0	0	0	1.89807	0.632691	1.09585	0.211325
H0YET3	Protein NPAT (Fragment) OS=Homo sapiens GN=NPAT PE=4 SV=1 - [H0YET3_HUMAN]	0	0	0	0	0	0	0.967055	0	0.322352	0.55833	0.211325
H0YF12	Tyrosine-protein phosphatase non-receptor type 11 (Fragment) OS=Homo sapiens GN=PTPN11 PE=4 SV=1 - [H0YF12_HUMAN]	0	0	0	0	0	0.978129	0	0	0.326043	0.564723	0.211325
H0YFA4	Cysteine-rich protein 2 (Fragment) OS=Homo sapiens GN=CRIP2 PE=4 SV=1 - [H0YFA4_HUMAN]	0	0	0	0	0	4.89065	4.83528	9.49037	6.40543	2.67178	0.0266959
H0YFD2	Protein KRI1 homolog (Fragment) OS=Homo sapiens GN=KRI1 PE=4 SV=1 - [H0YFD2_HUMAN]	0	0	0	0	0	0.978129	0	0	0.326043	0.564723	0.211325
H0YFV1	Probable cysteine--tRNA ligase, mitochondrial (Fragment) OS=Homo sapiens GN=CARS2 PE=4 SV=1 - [H0YFV1_HUMAN]	0	0	0	0	0	0	0	0.949037	0.316346	0.547927	0.211325
H0YG52	Uncharacterized protein OS=Homo sapiens PE=2 SV=1 - [H0YG52_HUMAN]	0	0	0	0	0	0	0.967055	0	0.322352	0.55833	0.211325
H0YGN0	WASH complex subunit CCDC53 (Fragment) OS=Homo sapiens GN=CCDC53 PE=2 SV=1 - [H0YGN0_HUMAN]	0	0	0	0	0	0	0.967055	0	0.322352	0.55833	0.211325
H0YHD0	Breast cancer metastasis-suppressor 1-like protein (Fragment) OS=Homo sapiens GN=BRMS1L PE=4 SV=1 - [H0YHD0_HUMAN]	0	0	0	0	0	0	0	0.949037	0.316346	0.547927	0.211325
H0YHF1	Coenzyme Q-binding protein COQ10 homolog A, mitochondrial (Fragment) OS=Homo sapiens GN=COQ10A PE=4 SV=1 - [H0YHF1_HUMAN]	0	0	0	0	0	0	0	0.949037	0.316346	0.547927	0.211325
H0YHL5	Serine/threonine-protein kinase D1 (Fragment) OS=Homo sapiens GN=PRKD1 PE=2 SV=1 - [H0YHL5_HUMAN]	0	0	0	0	0	0.978129	0	0	0.326043	0.564723	0.211325
H0YHM7	Peptidyl-prolyl cis-trans isomerase FKBP11 (Fragment) OS=Homo sapiens GN=FKBP11 PE=2 SV=1 - [H0YHM7_HUMAN]	0	0	0	0	0	3.91252	0	4.74518	2.8859	2.5337	0.0936268
H0YHN7	Carboxypeptidase M (Fragment) OS=Homo sapiens GN=CPM PE=4 SV=1 - [H0YHN7_HUMAN]	0	0	0	0	0	0	0.967055	0	0.322352	0.55833	0.211325
H0YHR8	Cytosolic purine 5'-nucleotidase (Fragment) OS=Homo sapiens GN=NT5C2 PE=4 SV=1 - [H0YHR8_HUMAN]	0	0	0	0	0	0.978129	0.967055	0	0.648395	0.561554	0.0917583
H0YI92	Protein lin-7 homolog A (Fragment) OS=Homo sapiens GN=LIN7A PE=4 SV=1 - [H0YI92_HUMAN]	0	0	0	0	0	5.86877	0	5.69422	3.85433	3.33909	0.0917982
H0YIZ9	Centrosomal protein of 128 kDa (Fragment) OS=Homo sapiens GN=CEP128 PE=4 SV=1 - [H0YIZ9_HUMAN]	0	0	0	0	0	0.978129	0.967055	0	0.648395	0.561554	0.0917583
H0YJ40	SRA stem-loop-interacting RNA-binding protein, mitochondrial (Fragment) OS=Homo sapiens GN=SLIRP PE=4 SV=1 - [H0YJ40_HUMAN]	0	0	0	0	0	0	0	4.74518	1.58173	2.73963	0.211325
H0YJ63	Activator of 90 kDa heat shock protein ATPase homolog 1 (Fragment) OS=Homo sapiens GN=AHSA1 PE=4 SV=1 - [H0YJ63_HUMAN]	0	0	0	0	0	2.93439	2.90117	1.89807	2.57788	0.58896	0.00847889
H0YJ73	Tandem C2 domains nuclear protein (Fragment) OS=Homo sapiens GN=TC2N PE=2 SV=1 - [H0YJ73_HUMAN]	0	0	0	0	0	0	0	0.949037	0.316346	0.547927	0.211325
H0YJG4	Chromodomain-helicase-DNA-binding protein 8 (Fragment) OS=Homo sapiens GN=CHD8 PE=4 SV=1 - [H0YJG4_HUMAN]	0	0	0	0	0	0.978129	0	0	0.326043	0.564723	0.211325
H0YJH4	Diacylglycerol kinase alpha (Fragment) OS=Homo sapiens GN=DGKA PE=2 SV=1 - [H0YJH4_HUMAN]	0	0	0	0	0	0	0.967055	0	0.322352	0.55833	0.211325
H0YK42	Sorting nexin-1 OS=Homo sapiens GN=SNX1 PE=2 SV=1 - [H0YK42_HUMAN]	0	0	0	0	0	21.5188	0	18.9807	13.4999	11.7599	0.0925511
H0YK53	Probable phospholipid-transporting ATPase IM (Fragment) OS=Homo sapiens GN=ATP8B4 PE=4 SV=1 - [H0YK53_HUMAN]	0	0	0	0	0	0	0.967055	0	0.322352	0.55833	0.211325
H0YK84	A-kinase anchor protein 13 (Fragment) OS=Homo sapiens GN=AKAP13 PE=4 SV=1 - [H0YK84_HUMAN]	0	0	0	0	0	0	0.967055	0	0.322352	0.55833	0.211325
H0YKR2	HCG40828, isoform CRA_a OS=Homo sapiens GN=C15orf60 PE=4 SV=1 - [H0YKR2_HUMAN]	0	0	0	0	0	0.978129	0	0	0.326043	0.564723	0.211325
H0YKT0	Alpha-mannosidase 2x (Fragment) OS=Homo sapiens GN=MAN2A2 PE=4 SV=1 - [H0YKT0_HUMAN]	0	0	0	0	0	0.978129	0	0	0.326043	0.564723	0.211325
H0YKX1	RNA polymerase-associated protein RTF1 homolog (Fragment) OS=Homo sapiens GN=RTF1 PE=4 SV=1 - [H0YKX1_HUMAN]	0	0	0	0	0	0	0.967055	0	0.322352	0.55833	0.211325
H0YL34	Synemin OS=Homo sapiens GN=SYNM PE=2 SV=1 - [H0YL34_HUMAN]	0	0	0	0	0	1.95626	0	0	0.652086	1.12945	0.211325
H0YLA4	Sorbitol dehydrogenase OS=Homo sapiens GN=SORD PE=2 SV=1 - [H0YLA4_HUMAN]	0	0	0	0	0	0	0.967055	0	0.322352	0.55833	0.211325
H0YLB9	Alpha-mannosidase 2x (Fragment) OS=Homo sapiens GN=MAN2A2 PE=2 SV=1 - [H0YLB9_HUMAN]	0	0	0	0	0	0	2.90117	1.89807	1.59975	1.47341	0.100387
H0YLH9	Pro-interleukin-16 (Fragment) OS=Homo sapiens GN=IL16 PE=4 SV=2 - [H0YLH9_HUMAN]	0	0	0	0	0	0	0.967055	0	0.322352	0.55833	0.211325
H0YM21	Mortality factor 4-like protein 1 (Fragment) OS=Homo sapiens GN=MORF4L1 PE=2 SV=1 - [H0YM21_HUMAN]	0	0	0	0	0	0	0	0.949037	0.316346	0.547927	0.211325
H0YM62	Myocyte-specific enhancer factor 2A (Fragment) OS=Homo sapiens GN=MEF2A PE=2 SV=1 - [H0YM62_HUMAN]	0	0	0	0	0	0	1.93411	0	0.644704	1.11666	0.211325
H0YM69	Homeobox protein PKNOX1 OS=Homo sapiens GN=PKNOX1 PE=2 SV=1 - [H0YM69_HUMAN]	0	0	0	0	0	0	0	0.949037	0.316346	0.547927	0.211325
H0YM91	Brachyury protein (Fragment) OS=Homo sapiens GN=T PE=2 SV=1 - [H0YM91_HUMAN]	0	0	0	0	0	0.978129	0	0	0.326043	0.564723	0.211325
H0YMA6	Semaphorin-6D (Fragment) OS=Homo sapiens GN=SEMA6D PE=2 SV=1 - [H0YMA6_HUMAN]	0	0	0	0	0	0	0.967055	0	0.322352	0.55833	0.211325
H0YMI2	Short stature homeobox protein OS=Homo sapiens GN=SHOX PE=2 SV=1 - [H0YMI2_HUMAN]	0	0	0	0	0	0.978129	0	0	0.326043	0.564723	0.211325
H0YMM4	Interferon-stimulated gene 20 kDa protein (Fragment) OS=Homo sapiens GN=ISG20 PE=2 SV=1 - [H0YMM4_HUMAN]	0	0	0	0	0	0	0.967055	0	0.322352	0.55833	0.211325
H0YMN5	DNA helicase INO80 OS=Homo sapiens GN=INO80 PE=2 SV=1 - [H0YMN5_HUMAN]	0	0	0	0	0	0.978129	0	0	0.326043	0.564723	0.211325
H0YMP5	UPF0552 protein C15orf38 OS=Homo sapiens GN=C15orf38 PE=2 SV=1 - [H0YMP5_HUMAN]	0	0	0	0	0	0.978129	0	0	0.326043	0.564723	0.211325
H0YMT0	RAS guanyl-releasing protein 1 (Fragment) OS=Homo sapiens GN=RASGRP1 PE=2 SV=1 - [H0YMT0_HUMAN]	0	0	0	0	0	0	0	0.949037	0.316346	0.547927	0.211325
H0YN19	Myelin expression factor 2 (Fragment) OS=Homo sapiens GN=MYEF2 PE=4 SV=1 - [H0YN19_HUMAN]	0	0	0	0	0	0	0	1.89807	0.632691	1.09585	0.211325
H0YN67	Immunoglobulin superfamily-containing leucine-rich repeat protein (Fragment) OS=Homo sapiens GN=ISLR PE=2 SV=1 - [H0YN67_HUMAN]	0	0	0	0	0	0.978129	0.967055	0	0.648395	0.561554	0.0917583
H0YNE5	Regulator of microtubule dynamics protein 3 (Fragment) OS=Homo sapiens GN=RMDN3 PE=2 SV=1 - [H0YNE5_HUMAN]	0	0	0	0	0	1.95626	0	0	0.652086	1.12945	0.211325
H3BLS7	Vacuolar protein sorting-associated protein 13D (Fragment) OS=Homo sapiens GN=VPS13D PE=4 SV=1 - [H3BLS7_HUMAN]	0	0	0	0	0	0	0.967055	0	0.322352	0.55833	0.211325
H3BLU7	Aflatoxin B1 aldehyde reductase member 2 (Fragment) OS=Homo sapiens GN=AKR7A2 PE=2 SV=1 - [H3BLU7_HUMAN]	0	0	0	0	0	21.5188	0	0	7.17295	12.4239	0.211325
H3BLX9	Transmembrane protein 2 (Fragment) OS=Homo sapiens GN=TMEM2 PE=2 SV=1 - [H3BLX9_HUMAN]	0	0	0	0	0	0.978129	0	0	0.326043	0.564723	0.211325
H3BM47	Group XV phospholipase A2 (Fragment) OS=Homo sapiens GN=PLA2G15 PE=2 SV=1 - [H3BM47_HUMAN]	0	0	0	0	0	0	0	0.949037	0.316346	0.547927	0.211325
H3BM67	Nucleolar protein 3 (Fragment) OS=Homo sapiens GN=NOL3 PE=2 SV=1 - [H3BM67_HUMAN]	0	0	0	0	0	1.95626	0	0	0.652086	1.12945	0.211325
H3BM75	Protein TLDC1 OS=Homo sapiens GN=TLDC1 PE=2 SV=1 - [H3BM75_HUMAN]	0	0	0	0	0	0.978129	0	0.949037	0.642389	0.556515	0.0917982
H3BMT0	Hematological and neurological-expressed 1-like protein (Fragment) OS=Homo sapiens GN=HN1L PE=2 SV=1 - [H3BMT0_HUMAN]	0	0	0	0	0	0	1.93411	0	0.644704	1.11666	0.211325
H3BMU1	IST1 homolog (Fragment) OS=Homo sapiens GN=IST1 PE=2 SV=1 - [H3BMU1_HUMAN]	0	0	0	0	0	16.6282	0	0	5.54273	9.60029	0.211325
H3BN26	Seizure 6-like protein 2 (Fragment) OS=Homo sapiens GN=SEZ6L2 PE=4 SV=2 - [H3BN26_HUMAN]	0	0	0	0	0	0.978129	0	0.949037	0.642389	0.556515	0.0917982
H3BN78	Synaptotagmin-17 OS=Homo sapiens GN=SYT17 PE=2 SV=1 - [H3BN78_HUMAN]	0	0	0	0	0	0	0	0.949037	0.316346	0.547927	0.211325
H3BNS8	Ubiquitin carboxyl-terminal hydrolase 32 (Fragment) OS=Homo sapiens GN=USP10 PE=4 SV=1 - [H3BNS8_HUMAN]	0	0	0	0	0	0	0.967055	0.949037	0.638697	0.553201	0.0917698
H3BNT2	Ubiquinone biosynthesis protein COQ9, mitochondrial (Fragment) OS=Homo sapiens GN=COQ9 PE=2 SV=1 - [H3BNT2_HUMAN]	0	0	0	0	0	0	6.76939	0	2.25646	3.90831	0.211325
H3BP35	Diphosphomevalonate decarboxylase (Fragment) OS=Homo sapiens GN=MVD PE=2 SV=1 - [H3BP35_HUMAN]	0	0	0	0	0	0	0.967055	0	0.322352	0.55833	0.211325
H3BPD0	Zinc finger CCCH domain-containing protein 18 (Fragment) OS=Homo sapiens GN=ZC3H18 PE=2 SV=1 - [H3BPD0_HUMAN]	0	0	0	0	0	0	0.967055	0	0.322352	0.55833	0.211325
H3BPH9	Protein FAM192A (Fragment) OS=Homo sapiens GN=FAM192A PE=2 SV=1 - [H3BPH9_HUMAN]	0	0	0	0	0	0	0	0.949037	0.316346	0.547927	0.211325
H3BPM5	Mannose-6-phosphate isomerase (Fragment) OS=Homo sapiens GN=MPI PE=2 SV=1 - [H3BPM5_HUMAN]	0	0	0	0	0	0	1.93411	3.79615	1.91009	1.89819	0.111736
H3BPR7	Tyrosine-protein kinase receptor TYRO3 (Fragment) OS=Homo sapiens GN=TYRO3 PE=3 SV=1 - [H3BPR7_HUMAN]	0	0	0	0	0	0.978129	0	0	0.326043	0.564723	0.211325
H3BPW1	3-phosphoinositide-dependent protein kinase 1 (Fragment) OS=Homo sapiens GN=PDPK1 PE=2 SV=1 - [H3BPW1_HUMAN]	0	0	0	0	0	0	0.967055	0	0.322352	0.55833	0.211325
H3BQ10	3-phosphoinositide-dependent protein kinase 1 (Fragment) OS=Homo sapiens GN=PDPK1 PE=2 SV=1 - [H3BQ10_HUMAN]	0	0	0	0	0	0.978129	0	0	0.326043	0.564723	0.211325
H3BQ21	Signal-regulatory protein beta-1 isoform 3 (Fragment) OS=Homo sapiens GN=SIRPB1 PE=2 SV=1 - [H3BQ21_HUMAN]	0	0	0	0	0	0.978129	0	0	0.326043	0.564723	0.211325
H3BQZ5	UPF0235 protein C15orf40 OS=Homo sapiens GN=C15orf40 PE=2 SV=1 - [H3BQZ5_HUMAN]	0	0	0	0	0	0.978129	0	0	0.326043	0.564723	0.211325
H3BR06	Telomeric repeat-binding factor 2 (Fragment) OS=Homo sapiens GN=TERF2 PE=2 SV=1 - [H3BR06_HUMAN]	0	0	0	0	0	0	0.967055	1.89807	0.955043	0.949094	0.111736
H3BT58	Coactosin-like protein OS=Homo sapiens GN=COTL1 PE=2 SV=1 - [H3BT58_HUMAN]	0	0	0	0	0	0	0.967055	0	0.322352	0.55833	0.211325
H3BTE3	Putative N-acetylglucosamine-6-phosphate deacetylase (Fragment) OS=Homo sapiens GN=AMDHD2 PE=2 SV=1 - [H3BTE3_HUMAN]	0	0	0	0	0	0	0	0.949037	0.316346	0.547927	0.211325
H3BTL6	Kinesin-like protein KIFC3 (Fragment) OS=Homo sapiens GN=KIFC3 PE=2 SV=1 - [H3BTL6_HUMAN]	0	0	0	0	0	0	0.967055	0	0.322352	0.55833	0.211325
H3BTU3	Transcription factor 25 (Fragment) OS=Homo sapiens GN=TCF25 PE=2 SV=1 - [H3BTU3_HUMAN]	0	0	0	0	0	0	0	0.949037	0.316346	0.547927	0.211325
H3BTW5	C-myc promoter-binding protein (Fragment) OS=Homo sapiens GN=DENND4A PE=2 SV=1 - [H3BTW5_HUMAN]	0	0	0	0	0	0.978129	0	0	0.326043	0.564723	0.211325
H3BU81	Ras-related protein Rab-27A (Fragment) OS=Homo sapiens GN=RAB27A PE=2 SV=1 - [H3BU81_HUMAN]	0	0	0	0	0	0.978129	0	0.949037	0.642389	0.556515	0.0917982
H3BUK6	Trafficking protein particle complex subunit 2-like protein OS=Homo sapiens GN=TRAPPC2L PE=2 SV=1 - [H3BUK6_HUMAN]	0	0	0	0	0	0	0	0.949037	0.316346	0.547927	0.211325
H3BUM9	Tyrosine-protein kinase CSK (Fragment) OS=Homo sapiens GN=CSK PE=2 SV=1 - [H3BUM9_HUMAN]	0	0	0	0	0	0	2.90117	0	0.967055	1.67499	0.211325
H3BUP2	Nucleolar protein 3 (Fragment) OS=Homo sapiens GN=NOL3 PE=2 SV=1 - [H3BUP2_HUMAN]	0	0	0	0	0	0	1.93411	1.89807	1.27739	1.1064	0.0917698
H3BUR3	Calpain-3 (Fragment) OS=Homo sapiens GN=CAPN3 PE=2 SV=1 - [H3BUR3_HUMAN]	0	0	0	0	0	0	0.967055	0	0.322352	0.55833	0.211325
H3BUS0	E3 ubiquitin-protein ligase ARIH1 (Fragment) OS=Homo sapiens GN=ARIH1 PE=4 SV=1 - [H3BUS0_HUMAN]	0	0	0	0	0	0.978129	0	0	0.326043	0.564723	0.211325
H3BV73	Protein kinase C beta type (Fragment) OS=Homo sapiens GN=PRKCB PE=2 SV=1 - [H3BV73_HUMAN]	0	0	0	0	0	0.978129	0	0	0.326043	0.564723	0.211325
H3BVH4	Uncharacterized protein OS=Homo sapiens PE=4 SV=1 - [H3BVH4_HUMAN]	0	0	0	0	0	0.978129	0	0	0.326043	0.564723	0.211325
H7BXE3	SAFB-like transcription modulator (Fragment) OS=Homo sapiens GN=SLTM PE=2 SV=1 - [H7BXE3_HUMAN]	0	0	0	0	0	0	0.967055	0	0.322352	0.55833	0.211325
H7BXF3	Transformer-2 protein homolog beta (Fragment) OS=Homo sapiens GN=TRA2B PE=4 SV=1 - [H7BXF3_HUMAN]	0	0	0	0	0	0	4.83528	2.84711	2.5608	2.43032	0.104772
H7BXI1	Extended synaptotagmin-2 (Fragment) OS=Homo sapiens GN=ESYT2 PE=2 SV=1 - [H7BXI1_HUMAN]	0	0	0	0	0	3.91252	0	0	1.30417	2.25889	0.211325
H7BXK7	Serpin B8 (Fragment) OS=Homo sapiens GN=SERPINB8 PE=3 SV=1 - [H7BXK7_HUMAN]	0	0	0	0	0	0	1.93411	0	0.644704	1.11666	0.211325
H7BXT7	BET1-like protein OS=Homo sapiens GN=BET1L PE=2 SV=1 - [H7BXT7_HUMAN]	0	0	0	0	0	0	0	0.949037	0.316346	0.547927	0.211325
H7BXX9	Homeodomain-interacting protein kinase 2 OS=Homo sapiens GN=HIPK2 PE=2 SV=1 - [H7BXX9_HUMAN]	0	0	0	0	0	0	0	1.89807	0.632691	1.09585	0.211325
H7BY35	Ryanodine receptor 2 OS=Homo sapiens GN=RYR2 PE=2 SV=1 - [H7BY35_HUMAN]	0	0	0	0	0	0.978129	0	0	0.326043	0.564723	0.211325
H7BY55	Complement decay-accelerating factor OS=Homo sapiens GN=CD55 PE=2 SV=1 - [H7BY55_HUMAN]	0	0	0	0	0	0.978129	0	0	0.326043	0.564723	0.211325
H7BY98	Transcription initiation factor TFIID subunit 1 (Fragment) OS=Homo sapiens GN=TAF1 PE=4 SV=1 - [H7BY98_HUMAN]	0	0	0	0	0	0	0.967055	0	0.322352	0.55833	0.211325
H7BYP0	Epidermal growth factor receptor substrate 15 OS=Homo sapiens GN=EPS15 PE=2 SV=1 - [H7BYP0_HUMAN]	0	0	0	0	0	1.95626	0	0	0.652086	1.12945	0.211325
H7BYW5	cAMP-dependent protein kinase type I-beta regulatory subunit (Fragment) OS=Homo sapiens GN=PRKAR1B PE=4 SV=1 - [H7BYW5_HUMAN]	0	0	0	0	0	0.978129	0	0	0.326043	0.564723	0.211325
H7BZ26	Sperm-specific antigen 2 (Fragment) OS=Homo sapiens GN=SSFA2 PE=2 SV=1 - [H7BZ26_HUMAN]	0	0	0	0	0	0.978129	0	0	0.326043	0.564723	0.211325
H7BZ35	Aspartate--tRNA ligase, cytoplasmic (Fragment) OS=Homo sapiens GN=DARS PE=2 SV=1 - [H7BZ35_HUMAN]	0	0	0	0	0	0	0	0.949037	0.316346	0.547927	0.211325
H7BZ45	Catechol O-methyltransferase (Fragment) OS=Homo sapiens GN=COMT PE=4 SV=1 - [H7BZ45_HUMAN]	0	0	0	0	0	3.91252	0	0	1.30417	2.25889	0.211325
H7BZK0	Sarcolemmal membrane-associated protein (Fragment) OS=Homo sapiens GN=SLMAP PE=4 SV=1 - [H7BZK0_HUMAN]	0	0	0	0	0	0	22.2423	0	7.41409	12.8416	0.211325
H7BZL6	Fibrous sheath-interacting protein 2 (Fragment) OS=Homo sapiens GN=FSIP2 PE=4 SV=1 - [H7BZL6_HUMAN]	0	0	0	0	0	0	0.967055	0.949037	0.638697	0.553201	0.0917698
H7BZY9	1-acylglycerol-3-phosphate O-acyltransferase ABHD5 (Fragment) OS=Homo sapiens GN=ABHD5 PE=2 SV=1 - [H7BZY9_HUMAN]	0	0	0	0	0	0.978129	0	0	0.326043	0.564723	0.211325
H7C022	WD repeat-containing protein 60 (Fragment) OS=Homo sapiens GN=WDR60 PE=2 SV=1 - [H7C022_HUMAN]	0	0	0	0	0	0	0	0.949037	0.316346	0.547927	0.211325
H7C0D0	Lanosterol 14-alpha demethylase (Fragment) OS=Homo sapiens GN=CYP51A1 PE=3 SV=1 - [H7C0D0_HUMAN]	0	0	0	0	0	0	1.93411	0	0.644704	1.11666	0.211325
H7C0K6	Kinesin-like protein KIF1A (Fragment) OS=Homo sapiens GN=KIF1A PE=3 SV=1 - [H7C0K6_HUMAN]	0	0	0	0	0	0	1.93411	0	0.644704	1.11666	0.211325
H7C0T0	Constitutive coactivator of PPAR-gamma-like protein 1 (Fragment) OS=Homo sapiens GN=FAM120A PE=4 SV=1 - [H7C0T0_HUMAN]	0	0	0	0	0	0	0	2.84711	0.949037	1.64378	0.211325
H7C0X5	Probable serine carboxypeptidase CPVL (Fragment) OS=Homo sapiens GN=CPVL PE=4 SV=1 - [H7C0X5_HUMAN]	0	0	0	0	0	0	12.5717	0	4.19057	7.25829	0.211325
H7C131	3-ketoacyl-CoA thiolase, peroxisomal (Fragment) OS=Homo sapiens GN=ACAA1 PE=3 SV=1 - [H7C131_HUMAN]	0	0	0	0	0	0	22.2423	0	7.41409	12.8416	0.211325
H7C1K7	Kinesin-like protein KIF15 (Fragment) OS=Homo sapiens GN=KIF15 PE=4 SV=1 - [H7C1K7_HUMAN]	0	0	0	0	0	0	0.967055	0	0.322352	0.55833	0.211325
H7C1R5	Cyclic AMP-responsive element-binding protein 1 (Fragment) OS=Homo sapiens GN=CREB1 PE=2 SV=1 - [H7C1R5_HUMAN]	0	0	0	0	0	0.978129	0.967055	0.949037	0.96474	0.0146837	3.86052e-05
H7C1T3	Choline-phosphate cytidylyltransferase A (Fragment) OS=Homo sapiens GN=PCYT1A PE=2 SV=1 - [H7C1T3_HUMAN]	0	0	0	0	0	0	2.90117	0	0.967055	1.67499	0.211325
H7C1Z2	Anion exchange protein 3 (Fragment) OS=Homo sapiens GN=SLC4A3 PE=4 SV=1 - [H7C1Z2_HUMAN]	0	0	0	0	0	0	0	0.949037	0.316346	0.547927	0.211325
H7C2A6	Cysteine protease ATG4B (Fragment) OS=Homo sapiens GN=ATG4B PE=2 SV=1 - [H7C2A6_HUMAN]	0	0	0	0	0	0	0	0.949037	0.316346	0.547927	0.211325
H7C2J6	Transient receptor potential cation channel subfamily V member 5 (Fragment) OS=Homo sapiens GN=TRPV5 PE=2 SV=1 - [H7C2J6_HUMAN]	0	0	0	0	0	0.978129	0	0	0.326043	0.564723	0.211325
H7C2L4	Transformer-2 protein homolog beta (Fragment) OS=Homo sapiens GN=TRA2B PE=4 SV=1 - [H7C2L4_HUMAN]	0	0	0	0	0	1.95626	0	0	0.652086	1.12945	0.211325
H7C2M7	Armadillo repeat-containing protein 10 (Fragment) OS=Homo sapiens GN=ARMC10 PE=2 SV=1 - [H7C2M7_HUMAN]	0	0	0	0	0	0	0	0.949037	0.316346	0.547927	0.211325
H7C2N5	UPF0577 protein KIAA1324-like (Fragment) OS=Homo sapiens GN=KIAA1324L PE=4 SV=1 - [H7C2N5_HUMAN]	0	0	0	0	0	0.978129	0.967055	0	0.648395	0.561554	0.0917583
H7C2W1	D-beta-hydroxybutyrate dehydrogenase, mitochondrial (Fragment) OS=Homo sapiens GN=BDH1 PE=4 SV=1 - [H7C2W1_HUMAN]	0	0	0	0	0	0	0.967055	0	0.322352	0.55833	0.211325
H7C333	Protein NipSnap homolog 2 (Fragment) OS=Homo sapiens GN=GBAS PE=4 SV=1 - [H7C333_HUMAN]	0	0	0	0	0	5.86877	0	11.3884	5.7524	5.69511	0.111157
H7C3B7	B9 domain-containing protein 1 (Fragment) OS=Homo sapiens GN=B9D1 PE=2 SV=1 - [H7C3B7_HUMAN]	0	0	0	0	0	0.978129	0	0	0.326043	0.564723	0.211325
H7C3E0	Carboxy-terminal domain RNA polymerase II polypeptide A small phosphatase 1 (Fragment) OS=Homo sapiens GN=CTDSP1 PE=4 SV=1 - [H7C3E0_HUMAN]	0	0	0	0	0	0	0	0.949037	0.316346	0.547927	0.211325
H7C3I5	Quinone oxidoreductase-like protein 1 (Fragment) OS=Homo sapiens GN=CRYZL1 PE=4 SV=1 - [H7C3I5_HUMAN]	0	0	0	0	0	0	1.93411	0	0.644704	1.11666	0.211325
H7C3M4	Phytanoyl-CoA dioxygenase domain-containing protein 1 (Fragment) OS=Homo sapiens GN=PHYHD1 PE=4 SV=1 - [H7C3M4_HUMAN]	0	0	0	0	0	0	0.967055	0	0.322352	0.55833	0.211325
H7C3S8	5'-nucleotidase domain-containing protein 3 (Fragment) OS=Homo sapiens GN=NT5DC3 PE=4 SV=1 - [H7C3S8_HUMAN]	0	0	0	0	0	0.978129	0	0	0.326043	0.564723	0.211325
H7C460	Zinc finger protein 277 (Fragment) OS=Homo sapiens GN=ZNF277 PE=2 SV=1 - [H7C460_HUMAN]	0	0	0	0	0	0.978129	0	0	0.326043	0.564723	0.211325
H7C4I6	Dol-P-Man:Man(7)GlcNAc(2)-PP-Dol alpha-1,6-mannosyltransferase (Fragment) OS=Homo sapiens GN=ALG12 PE=4 SV=1 - [H7C4I6_HUMAN]	0	0	0	0	0	0	0.967055	0	0.322352	0.55833	0.211325
H7C4V0	PX domain-containing protein kinase-like protein (Fragment) OS=Homo sapiens GN=PXK PE=4 SV=1 - [H7C4V0_HUMAN]	0	0	0	0	0	0	0	0.949037	0.316346	0.547927	0.211325
H7C531	26S proteasome non-ATPase regulatory subunit 6 (Fragment) OS=Homo sapiens GN=PSMD6 PE=4 SV=1 - [H7C531_HUMAN]	0	0	0	0	0	0.978129	0	0.949037	0.642389	0.556515	0.0917982
H7C5K2	Stromal interaction molecule 2 (Fragment) OS=Homo sapiens GN=STIM2 PE=2 SV=1 - [H7C5K2_HUMAN]	0	0	0	0	0	1.95626	0	0	0.652086	1.12945	0.211325
H7C5K4	Coiled-coil domain-containing protein 80 (Fragment) OS=Homo sapiens GN=CCDC80 PE=4 SV=1 - [H7C5K4_HUMAN]	0	0	0	0	0	0	3.86822	3.79615	2.55479	2.21281	0.0917698
H7C5L6	SRSF protein kinase 2 (Fragment) OS=Homo sapiens GN=SRPK2 PE=4 SV=1 - [H7C5L6_HUMAN]	0	0	0	0	0	0	0	0.949037	0.316346	0.547927	0.211325
H7C5M1	RNA-binding protein 34 (Fragment) OS=Homo sapiens GN=RBM34 PE=4 SV=1 - [H7C5M1_HUMAN]	0	0	0	0	0	0	0	0.949037	0.316346	0.547927	0.211325
H7C5N8	Protein PRRC2C (Fragment) OS=Homo sapiens GN=PRRC2C PE=4 SV=1 - [H7C5N8_HUMAN]	0	0	0	0	0	0	0	0.949037	0.316346	0.547927	0.211325
H7C5P8	Thioredoxin domain-containing protein 6 (Fragment) OS=Homo sapiens GN=NME9 PE=4 SV=1 - [H7C5P8_HUMAN]	0	0	0	0	0	0	0	0.949037	0.316346	0.547927	0.211325
H7C5S6	Leucine-rich repeat and WD repeat-containing protein 1 (Fragment) OS=Homo sapiens GN=LRWD1 PE=4 SV=1 - [H7C5S6_HUMAN]	0	0	0	0	0	0	0.967055	0	0.322352	0.55833	0.211325
H7C5U6	Ribonuclease 3 (Fragment) OS=Homo sapiens GN=DROSHA PE=4 SV=1 - [H7C5U6_HUMAN]	0	0	0	0	0	0	0.967055	0	0.322352	0.55833	0.211325
H7C5V9	LON peptidase N-terminal domain and RING finger protein 1 (Fragment) OS=Homo sapiens GN=LONRF1 PE=2 SV=1 - [H7C5V9_HUMAN]	0	0	0	0	0	0.978129	0	0	0.326043	0.564723	0.211325
H9KV81	Tetratricopeptide repeat protein 5 OS=Homo sapiens GN=TTC5 PE=2 SV=1 - [H9KV81_HUMAN]	0	0	0	0	0	0	0.967055	0	0.322352	0.55833	0.211325
H9KVA9	Lys-63-specific deubiquitinase BRCC36 OS=Homo sapiens GN=BRCC3 PE=2 SV=1 - [H9KVA9_HUMAN]	0	0	0	0	0	0	0.967055	0	0.322352	0.55833	0.211325
I3L097	Uncharacterized protein OS=Homo sapiens PE=4 SV=1 - [I3L097_HUMAN]	0	0	0	0	0	0	0	0.949037	0.316346	0.547927	0.211325
I3L1C4	Ethanolamine-phosphate cytidylyltransferase (Fragment) OS=Homo sapiens GN=PCYT2 PE=2 SV=1 - [I3L1C4_HUMAN]	0	0	0	0	0	0	0.967055	0	0.322352	0.55833	0.211325
I3L1I8	Serine/arginine repetitive matrix protein 2 (Fragment) OS=Homo sapiens GN=SRRM2 PE=2 SV=1 - [I3L1I8_HUMAN]	0	0	0	0	0	1.95626	1.93411	1.89807	1.92948	0.0293673	3.86052e-05
I3L1J1	Sex hormone-binding globulin OS=Homo sapiens GN=SHBG PE=2 SV=1 - [I3L1J1_HUMAN]	0	0	0	0	0	1.95626	0.967055	0.949037	1.29078	0.576388	0.0302488
I3L1K6	Myosin light chain 4 (Fragment) OS=Homo sapiens GN=MYL4 PE=2 SV=1 - [I3L1K6_HUMAN]	0	0	0	0	0	2.93439	0	4.74518	2.55986	2.39466	0.102648
I3L1P5	Hepatocyte growth factor-regulated tyrosine kinase substrate (Fragment) OS=Homo sapiens GN=HGS PE=2 SV=1 - [I3L1P5_HUMAN]	0	0	0	0	0	0	0.967055	0	0.322352	0.55833	0.211325
I3L2F4	Enhancer of mRNA-decapping protein 4 (Fragment) OS=Homo sapiens GN=EDC4 PE=4 SV=1 - [I3L2F4_HUMAN]	0	0	0	0	0	0	0	0.949037	0.316346	0.547927	0.211325
I3L2I2	Misshapen-like kinase 1 (Fragment) OS=Homo sapiens GN=MINK1 PE=4 SV=1 - [I3L2I2_HUMAN]	0	0	0	0	0	0	0.967055	0	0.322352	0.55833	0.211325
I3L2J6	Brain-specific angiogenesis inhibitor 1-associated protein 2 OS=Homo sapiens GN=BAIAP2 PE=2 SV=1 - [I3L2J6_HUMAN]	0	0	0	0	0	0.978129	0.967055	0	0.648395	0.561554	0.0917583
I3L325	Thiomorpholine-carboxylate dehydrogenase (Fragment) OS=Homo sapiens GN=CRYM PE=2 SV=1 - [I3L325_HUMAN]	0	0	0	0	0	0	0.967055	0	0.322352	0.55833	0.211325
I3L3E4	Charged multivesicular body protein 6 (Fragment) OS=Homo sapiens GN=CHMP6 PE=2 SV=1 - [I3L3E4_HUMAN]	0	0	0	0	0	3.91252	0	0	1.30417	2.25889	0.211325
I3L3E6	WSC domain-containing protein 1 OS=Homo sapiens GN=WSCD1 PE=2 SV=1 - [I3L3E6_HUMAN]	0	0	0	0	0	0.978129	0	0	0.326043	0.564723	0.211325
I3L3E9	Flap endonuclease 1 (Fragment) OS=Homo sapiens GN=FEN1 PE=4 SV=1 - [I3L3E9_HUMAN]	0	0	0	0	0	0	0.967055	1.89807	0.955043	0.949094	0.111736
I3L3G9	Nuclear distribution protein nudE homolog 1 OS=Homo sapiens GN=NDE1 PE=2 SV=1 - [I3L3G9_HUMAN]	0	0	0	0	0	0.978129	0	0	0.326043	0.564723	0.211325
I3L3J8	Sodium/potassium-transporting ATPase subunit beta-2 (Fragment) OS=Homo sapiens GN=ATP1B2 PE=3 SV=1 - [I3L3J8_HUMAN]	0	0	0	0	0	0.978129	0.967055	0.949037	0.96474	0.0146837	3.86052e-05
I3L3J9	Thiomorpholine-carboxylate dehydrogenase (Fragment) OS=Homo sapiens GN=CRYM PE=2 SV=1 - [I3L3J9_HUMAN]	0	0	0	0	0	0.978129	0	0	0.326043	0.564723	0.211325
I3L3S0	Trafficking protein particle complex subunit 1 (Fragment) OS=Homo sapiens GN=TRAPPC1 PE=2 SV=1 - [I3L3S0_HUMAN]	0	0	0	0	0	0	0.967055	0	0.322352	0.55833	0.211325
I3L3T4	TOM1-like protein 1 OS=Homo sapiens GN=TOM1L1 PE=2 SV=1 - [I3L3T4_HUMAN]	0	0	0	0	0	0	0	2.84711	0.949037	1.64378	0.211325
I3L3U1	Myosin light chain 4 OS=Homo sapiens GN=MYL4 PE=2 SV=1 - [I3L3U1_HUMAN]	0	0	0	0	0	0	0.967055	0	0.322352	0.55833	0.211325
I3L3W1	Phosphatidylinositol transfer protein alpha isoform (Fragment) OS=Homo sapiens GN=PITPNA PE=2 SV=1 - [I3L3W1_HUMAN]	0	0	0	0	0	0.978129	1.93411	0.949037	1.28709	0.560523	0.0288964
I3L443	RNA methyltransferase-like protein 1 (Fragment) OS=Homo sapiens GN=RNMTL1 PE=4 SV=1 - [I3L443_HUMAN]	0	0	0	0	0	0	1.93411	0	0.644704	1.11666	0.211325
I3L4G0	TOM1-like protein 1 (Fragment) OS=Homo sapiens GN=TOM1L1 PE=4 SV=1 - [I3L4G0_HUMAN]	0	0	0	0	0	1.95626	0	0	0.652086	1.12945	0.211325
I3L4J1	Uncharacterized protein (Fragment) OS=Homo sapiens PE=4 SV=2 - [I3L4J1_HUMAN]	0	0	0	0	0	0	0	2.84711	0.949037	1.64378	0.211325
I3L4N8	Actin, cytoplasmic 2, N-terminally processed (Fragment) OS=Homo sapiens GN=ACTG1 PE=2 SV=1 - [I3L4N8_HUMAN]	0	0	0	0	0	507.649	0	0	169.216	293.091	0.211325
I3L4R8	Replication protein A 70 kDa DNA-binding subunit (Fragment) OS=Homo sapiens GN=RPA1 PE=2 SV=1 - [I3L4R8_HUMAN]	0	0	0	0	0	0.978129	0	0	0.326043	0.564723	0.211325
I3L520	Dynein heavy chain 2, axonemal (Fragment) OS=Homo sapiens GN=DNAH2 PE=2 SV=1 - [I3L520_HUMAN]	0	0	0	0	0	0.978129	0	0	0.326043	0.564723	0.211325
I3NI21	Promethin (Fragment) OS=Homo sapiens GN=TMEM159 PE=2 SV=1 - [I3NI21_HUMAN]	0	0	0	0	0	0	0.967055	0	0.322352	0.55833	0.211325
I3NI22	N-sulphoglucosamine sulphohydrolase (Fragment) OS=Homo sapiens GN=SGSH PE=4 SV=1 - [I3NI22_HUMAN]	0	0	0	0	0	0	4.83528	0	1.61176	2.79165	0.211325
J3KMX1	Nuclear pore complex protein Nup88 (Fragment) OS=Homo sapiens GN=NUP88 PE=4 SV=1 - [J3KMX1_HUMAN]	0	0	0	0	0	0	0	0.949037	0.316346	0.547927	0.211325
J3KMX5	40S ribosomal protein S13 OS=Homo sapiens GN=RPS13 PE=4 SV=1 - [J3KMX5_HUMAN]	0	0	0	0	0	4.89065	6.76939	6.64326	6.1011	1.05018	0.00486611
J3KN55	Cob(I)yrinic acid a,c-diamide adenosyltransferase, mitochondrial OS=Homo sapiens GN=MMAB PE=4 SV=1 - [J3KN55_HUMAN]	0	0	0	0	0	8.80316	0	0	2.93439	5.08251	0.211325
J3KN66	Torsin-1A-interacting protein 1 OS=Homo sapiens GN=TOR1AIP1 PE=4 SV=1 - [J3KN66_HUMAN]	0	0	0	0	0	36.1908	0	0	12.0636	20.8948	0.211325
J3KND9	Electron transfer flavoprotein-ubiquinone oxidoreductase, mitochondrial OS=Homo sapiens GN=ETFDH PE=4 SV=1 - [J3KND9_HUMAN]	0	0	0	0	0	6.8469	6.76939	6.64326	6.75318	0.102786	3.86052e-05
J3KNJ3	N-acetylated-alpha-linked acidic dipeptidase 2 OS=Homo sapiens GN=NAALAD2 PE=4 SV=1 - [J3KNJ3_HUMAN]	0	0	0	0	0	0.978129	0	0	0.326043	0.564723	0.211325
J3KNQ2	Fibronectin type III domain-containing protein 1 (Fragment) OS=Homo sapiens GN=FNDC1 PE=4 SV=1 - [J3KNQ2_HUMAN]	0	0	0	0	0	0.978129	2.90117	2.84711	2.24214	1.09499	0.0355623
J3KP22	Receptor-type tyrosine-protein phosphatase alpha OS=Homo sapiens GN=PTPRA PE=4 SV=1 - [J3KP22_HUMAN]	0	0	0	0	0	0.978129	0	0	0.326043	0.564723	0.211325
J3KP26	Ankyrin repeat domain-containing protein 46 (Fragment) OS=Homo sapiens GN=ANKRD46 PE=4 SV=1 - [J3KP26_HUMAN]	0	0	0	0	0	0.978129	1.93411	0	0.970747	0.967076	0.112116
J3KPS2	Protein FAM83H (Fragment) OS=Homo sapiens GN=FAM83H PE=4 SV=1 - [J3KPS2_HUMAN]	0	0	0	0	0	0.978129	0	0	0.326043	0.564723	0.211325
J3KQ34	COP9 signalosome complex subunit 7b OS=Homo sapiens GN=COPS7B PE=4 SV=1 - [J3KQ34_HUMAN]	0	0	0	0	0	2.93439	1.93411	2.84711	2.57187	0.554036	0.00755946
J3KQ54	Protein monoglycylase TTLL8 OS=Homo sapiens GN=TTLL8 PE=4 SV=1 - [J3KQ54_HUMAN]	0	0	0	0	0	0.978129	0	0	0.326043	0.564723	0.211325
J3KQ61	Bromodomain-containing protein 1 (Fragment) OS=Homo sapiens GN=BRD1 PE=4 SV=1 - [J3KQ61_HUMAN]	0	0	0	0	0	0.978129	0	0	0.326043	0.564723	0.211325
J3KRG9	GTP-binding protein RAD (Fragment) OS=Homo sapiens GN=RRAD PE=4 SV=1 - [J3KRG9_HUMAN]	0	0	0	0	0	0	0.967055	0	0.322352	0.55833	0.211325
J3KRR1	Protein Njmu-R1 (Fragment) OS=Homo sapiens GN=C17orf75 PE=4 SV=1 - [J3KRR1_HUMAN]	0	0	0	0	0	0	0	0.949037	0.316346	0.547927	0.211325
J3KRW7	Transmembrane protein 199 OS=Homo sapiens GN=TMEM199 PE=4 SV=1 - [J3KRW7_HUMAN]	0	0	0	0	0	0.978129	0	0	0.326043	0.564723	0.211325
J3KSI8	28S ribosomal protein S7, mitochondrial (Fragment) OS=Homo sapiens GN=MRPS7 PE=4 SV=1 - [J3KSI8_HUMAN]	0	0	0	0	0	3.91252	0	0	1.30417	2.25889	0.211325
J3KST8	Cytokine receptor-like factor 3 OS=Homo sapiens GN=CRLF3 PE=4 SV=1 - [J3KST8_HUMAN]	0	0	0	0	0	0	0	0.949037	0.316346	0.547927	0.211325
J3KTA9	Glycerophosphodiester phosphodiesterase domain-containing protein 1 OS=Homo sapiens GN=GDPD1 PE=4 SV=1 - [J3KTA9_HUMAN]	0	0	0	0	0	0.978129	0.967055	0	0.648395	0.561554	0.0917583
J3KTC1	RNA-binding protein Musashi homolog 2 (Fragment) OS=Homo sapiens GN=MSI2 PE=4 SV=1 - [J3KTC1_HUMAN]	0	0	0	0	0	0	5.80233	0	1.93411	3.34998	0.211325
J3KTL7	Cyclin-dependent kinase 11B OS=Homo sapiens GN=CDK11B PE=4 SV=1 - [J3KTL7_HUMAN]	0	0	0	0	0	0	0	1.89807	0.632691	1.09585	0.211325
J3QK84	Nebulin OS=Homo sapiens GN=NEB PE=4 SV=1 - [J3QK84_HUMAN]	0	0	0	0	0	0	0.967055	0	0.322352	0.55833	0.211325
J3QKK8	Prostamide/prostaglandin F synthase (Fragment) OS=Homo sapiens GN=FAM213B PE=4 SV=1 - [J3QKK8_HUMAN]	0	0	0	0	0	0.978129	0	0	0.326043	0.564723	0.211325
J3QKM1	Uncharacterized protein C1orf159 OS=Homo sapiens GN=C1orf159 PE=4 SV=1 - [J3QKM1_HUMAN]	0	0	0	0	0	0	0	0.949037	0.316346	0.547927	0.211325
J3QKS7	SWI/SNF-related matrix-associated actin-dependent regulator of chromatin subfamily E member 1 (Fragment) OS=Homo sapiens GN=SMARCE1 PE=4 SV=1 - [J3QKS7_HUMAN]	0	0	0	0	0	3.91252	3.86822	5.69422	4.49165	1.04169	0.00873015
J3QL12	Thymidine kinase 2, mitochondrial (Fragment) OS=Homo sapiens GN=TK2 PE=4 SV=1 - [J3QL12_HUMAN]	0	0	0	0	0	0	0.967055	0	0.322352	0.55833	0.211325
J3QLD1	MIF4G domain-containing protein (Fragment) OS=Homo sapiens GN=MIF4GD PE=4 SV=1 - [J3QLD1_HUMAN]	0	0	0	0	0	0	2.90117	0	0.967055	1.67499	0.211325
J3QLG4	Centrosomal protein of 95 kDa (Fragment) OS=Homo sapiens GN=CEP95 PE=4 SV=1 - [J3QLG4_HUMAN]	0	0	0	0	0	0	0.967055	0	0.322352	0.55833	0.211325
J3QLV0	Nuclear pore complex protein Nup85 (Fragment) OS=Homo sapiens GN=NUP85 PE=4 SV=1 - [J3QLV0_HUMAN]	0	0	0	0	0	0	0	0.949037	0.316346	0.547927	0.211325
J3QLW7	60S ribosome subunit biogenesis protein NIP7 homolog OS=Homo sapiens GN=NIP7 PE=4 SV=1 - [J3QLW7_HUMAN]	0	0	0	0	0	0.978129	0	0	0.326043	0.564723	0.211325
J3QQM4	E3 ubiquitin-protein ligase SMURF2 (Fragment) OS=Homo sapiens GN=SMURF2 PE=4 SV=1 - [J3QQM4_HUMAN]	0	0	0	0	0	0	0.967055	0	0.322352	0.55833	0.211325
J3QQT2	60S ribosomal protein L17 (Fragment) OS=Homo sapiens GN=RPL17 PE=3 SV=1 - [J3QQT2_HUMAN]	0	0	0	0	0	0	3.86822	0	1.28941	2.23332	0.211325
J3QQW3	Uncharacterized protein KIAA0195 OS=Homo sapiens GN=KIAA0195 PE=4 SV=1 - [J3QQW3_HUMAN]	0	0	0	0	0	0.978129	0	0	0.326043	0.564723	0.211325
J3QQX0	COP9 signalosome complex subunit 1 (Fragment) OS=Homo sapiens GN=GPS1 PE=4 SV=1 - [J3QQX0_HUMAN]	0	0	0	0	0	0	0	0.949037	0.316346	0.547927	0.211325
J3QQY2	Transmembrane and coiled-coil domain-containing protein 1 OS=Homo sapiens GN=TMCO1 PE=4 SV=1 - [J3QQY2_HUMAN]	0	0	0	0	0	0	0	1.89807	0.632691	1.09585	0.211325
J3QR81	Dymeclin (Fragment) OS=Homo sapiens GN=DYM PE=4 SV=1 - [J3QR81_HUMAN]	0	0	0	0	0	0	0	0.949037	0.316346	0.547927	0.211325
J3QR84	Secernin-2 (Fragment) OS=Homo sapiens GN=SCRN2 PE=4 SV=1 - [J3QR84_HUMAN]	0	0	0	0	0	0	0	5.69422	1.89807	3.28756	0.211325
J3QS88	COP9 signalosome complex subunit 1 (Fragment) OS=Homo sapiens GN=GPS1 PE=4 SV=1 - [J3QS88_HUMAN]	0	0	0	0	0	0	0.967055	0	0.322352	0.55833	0.211325
J3QS92	Galectin-9 (Fragment) OS=Homo sapiens GN=LGALS9 PE=4 SV=1 - [J3QS92_HUMAN]	0	0	0	0	0	0	0.967055	0	0.322352	0.55833	0.211325
J3QSV6	Ribosomal L1 domain-containing protein 1 (Fragment) OS=Homo sapiens GN=RSL1D1 PE=4 SV=1 - [J3QSV6_HUMAN]	0	0	0	0	0	10.7594	5.80233	12.3375	9.63308	3.41006	0.0196617
J3QTB1	Stimulator of interferon genes protein (Fragment) OS=Homo sapiens GN=TMEM173 PE=4 SV=1 - [J3QTB1_HUMAN]	0	0	0	0	0	1.95626	1.93411	3.79615	2.56217	1.06871	0.0266959
J3QTB2	Coiled-coil-helix-coiled-coil-helix domain-containing protein 6, mitochondrial OS=Homo sapiens GN=CHCHD6 PE=4 SV=1 - [J3QTB2_HUMAN]	0	0	0	0	0	0	1.93411	0	0.644704	1.11666	0.211325
J3QTP8	E3 ubiquitin-protein ligase RNF213 OS=Homo sapiens GN=RNF213 PE=4 SV=1 - [J3QTP8_HUMAN]	0	0	0	0	0	0	0	0.949037	0.316346	0.547927	0.211325
J3QTZ2	Ankyrin repeat domain-containing protein 62 OS=Homo sapiens GN=ANKRD62 PE=4 SV=1 - [J3QTZ2_HUMAN]	0	0	0	0	0	0.978129	0	0	0.326043	0.564723	0.211325
K7EIE9	Tyrosine-protein phosphatase non-receptor type 2 (Fragment) OS=Homo sapiens GN=PTPN2 PE=4 SV=1 - [K7EIE9_HUMAN]	0	0	0	0	0	0	0	0.949037	0.316346	0.547927	0.211325
K7EIF9	Signal transducer and activator of transcription 5A (Fragment) OS=Homo sapiens GN=STAT5A PE=4 SV=1 - [K7EIF9_HUMAN]	0	0	0	0	0	0	0	0.949037	0.316346	0.547927	0.211325
K7EIN4	Transmembrane emp24 domain-containing protein 1 OS=Homo sapiens GN=TMED1 PE=4 SV=1 - [K7EIN4_HUMAN]	0	0	0	0	0	0	4.83528	0	1.61176	2.79165	0.211325
K7EIT8	TFIIH basal transcription factor complex helicase XPD subunit (Fragment) OS=Homo sapiens GN=ERCC2 PE=4 SV=1 - [K7EIT8_HUMAN]	0	0	0	0	0	0	0	0.949037	0.316346	0.547927	0.211325
K7EJ05	Syntaxin-10 (Fragment) OS=Homo sapiens GN=STX10 PE=4 SV=1 - [K7EJ05_HUMAN]	0	0	0	0	0	0.978129	0	0	0.326043	0.564723	0.211325
K7EJV8	Polypeptide N-acetylgalactosaminyltransferase 1 soluble form OS=Homo sapiens GN=GALNT1 PE=4 SV=1 - [K7EJV8_HUMAN]	0	0	0	0	0	0	0	0.949037	0.316346	0.547927	0.211325
K7EJY5	Coiled-coil and C2 domain-containing protein 1A (Fragment) OS=Homo sapiens GN=CC2D1A PE=4 SV=1 - [K7EJY5_HUMAN]	0	0	0	0	0	0	0	1.89807	0.632691	1.09585	0.211325
K7EK00	Protein FAM210A (Fragment) OS=Homo sapiens GN=FAM210A PE=4 SV=1 - [K7EK00_HUMAN]	0	0	0	0	0	3.91252	4.83528	0	2.91593	2.56707	0.0940042
K7EK04	Pleckstrin homology domain-containing family H member 3 (Fragment) OS=Homo sapiens GN=PLEKHH3 PE=4 SV=1 - [K7EK04_HUMAN]	0	0	0	0	0	0	0.967055	0	0.322352	0.55833	0.211325
K7EKM4	Spermidine synthase OS=Homo sapiens GN=SRM PE=4 SV=1 - [K7EKM4_HUMAN]	0	0	0	0	0	0	0.967055	0	0.322352	0.55833	0.211325
K7EKN5	Paralemmin-3 (Fragment) OS=Homo sapiens GN=PALM3 PE=4 SV=1 - [K7EKN5_HUMAN]	0	0	0	0	0	0	0	1.89807	0.632691	1.09585	0.211325
K7ELI1	GRB2-related adapter protein-like OS=Homo sapiens GN=GRAPL PE=4 SV=1 - [K7ELI1_HUMAN]	0	0	0	0	0	0	0	0.949037	0.316346	0.547927	0.211325
K7ELL0	Putative oxidoreductase GLYR1 OS=Homo sapiens GN=GLYR1 PE=4 SV=1 - [K7ELL0_HUMAN]	0	0	0	0	0	0.978129	0	0	0.326043	0.564723	0.211325
K7ELX4	Ferrochelatase, mitochondrial (Fragment) OS=Homo sapiens GN=FECH PE=3 SV=1 - [K7ELX4_HUMAN]	0	0	0	0	0	12.7157	0	0	4.23856	7.3414	0.211325
K7ELY9	Beclin-1 (Fragment) OS=Homo sapiens GN=BECN1 PE=4 SV=1 - [K7ELY9_HUMAN]	0	0	0	0	0	0	0.967055	0	0.322352	0.55833	0.211325
K7EM07	Transmembrane protein 101 OS=Homo sapiens GN=TMEM101 PE=4 SV=1 - [K7EM07_HUMAN]	0	0	0	0	0	0	0	1.89807	0.632691	1.09585	0.211325
K7EM24	V-type proton ATPase 116 kDa subunit a isoform 1 (Fragment) OS=Homo sapiens GN=ATP6V0A1 PE=4 SV=1 - [K7EM24_HUMAN]	0	0	0	0	0	0.978129	0.967055	0	0.648395	0.561554	0.0917583
K7EMA7	60S ribosomal protein L23a OS=Homo sapiens GN=RPL23A PE=3 SV=1 - [K7EMA7_HUMAN]	0	0	0	0	0	0	5.80233	0	1.93411	3.34998	0.211325
K7EMM0	Evolutionarily conserved-signaling intermediate in Toll pathway, mitochondrial OS=Homo sapiens GN=ECSIT PE=4 SV=1 - [K7EMM0_HUMAN]	0	0	0	0	0	5.86877	0	0	1.95626	3.38834	0.211325
K7EN42	Glycylpeptide N-tetradecanoyltransferase 1 (Fragment) OS=Homo sapiens GN=NMT1 PE=4 SV=1 - [K7EN42_HUMAN]	0	0	0	0	0	0	0.967055	0	0.322352	0.55833	0.211325
K7EN59	Coiled-coil domain-containing protein 151 OS=Homo sapiens GN=CCDC151 PE=4 SV=1 - [K7EN59_HUMAN]	0	0	0	0	0	0.978129	0	0	0.326043	0.564723	0.211325
K7ENH2	Proteasome activator complex subunit 3 (Fragment) OS=Homo sapiens GN=PSME3 PE=4 SV=1 - [K7ENH2_HUMAN]	0	0	0	0	0	1.95626	0	1.89807	1.28478	1.11303	0.0917982
K7ENJ0	UV excision repair protein RAD23 homolog A OS=Homo sapiens GN=RAD23A PE=4 SV=1 - [K7ENJ0_HUMAN]	0	0	0	0	0	0	3.86822	0	1.28941	2.23332	0.211325
K7ENJ2	Ran-binding protein 3 OS=Homo sapiens GN=RANBP3 PE=4 SV=1 - [K7ENJ2_HUMAN]	0	0	0	0	0	0	0.967055	0	0.322352	0.55833	0.211325
K7ENY0	Protein MEF2BNB (Fragment) OS=Homo sapiens GN=MEF2BNB PE=4 SV=1 - [K7ENY0_HUMAN]	0	0	0	0	0	0	0	0.949037	0.316346	0.547927	0.211325
K7EPI1	Queuine tRNA-ribosyltransferase (Fragment) OS=Homo sapiens GN=QTRT1 PE=4 SV=1 - [K7EPI1_HUMAN]	0	0	0	0	0	0	0.967055	0	0.322352	0.55833	0.211325
K7EPI3	Uncharacterized protein (Fragment) OS=Homo sapiens PE=4 SV=2 - [K7EPI3_HUMAN]	0	0	0	0	0	0	0	0.949037	0.316346	0.547927	0.211325
K7EPL2	SUMO-activating enzyme subunit 2 (Fragment) OS=Homo sapiens GN=UBA2 PE=4 SV=1 - [K7EPL2_HUMAN]	0	0	0	0	0	0	0	1.89807	0.632691	1.09585	0.211325
K7EPQ7	Protein YIF1B OS=Homo sapiens GN=YIF1B PE=4 SV=1 - [K7EPQ7_HUMAN]	0	0	0	0	0	0	0	0.949037	0.316346	0.547927	0.211325
K7EQ77	NADH dehydrogenase [ubiquinone] 1 alpha subcomplex subunit 11 OS=Homo sapiens GN=NDUFA11 PE=4 SV=1 - [K7EQ77_HUMAN]	0	0	0	0	0	0	1.93411	0	0.644704	1.11666	0.211325
K7EQK4	SEC14-like protein 1 (Fragment) OS=Homo sapiens GN=SEC14L1 PE=4 SV=1 - [K7EQK4_HUMAN]	0	0	0	0	0	0	0.967055	0	0.322352	0.55833	0.211325
K7EQV7	Zinc finger protein 700 OS=Homo sapiens GN=ZNF700 PE=4 SV=1 - [K7EQV7_HUMAN]	0	0	0	0	0	0	0	0.949037	0.316346	0.547927	0.211325
K7ER25	Voltage-dependent calcium channel subunit alpha-2/delta-4 OS=Homo sapiens GN=CACNA2D4 PE=4 SV=1 - [K7ER25_HUMAN]	0	0	0	0	0	0	0	0.949037	0.316346	0.547927	0.211325
K7ERE3	Keratin, type I cytoskeletal 13 OS=Homo sapiens GN=KRT13 PE=3 SV=1 - [K7ERE3_HUMAN]	0	0	0	0	0	39.1252	36.7481	40.8086	38.8939	2.04009	0.000457916
K7ES02	Bleomycin hydrolase (Fragment) OS=Homo sapiens GN=BLMH PE=4 SV=1 - [K7ES02_HUMAN]	0	0	0	0	0	11.7375	0	0	3.91252	6.77668	0.211325
K7ES20	Cyclin-dependent kinase inhibitor 2A, isoforms 1/2/3 OS=Homo sapiens GN=CDKN2A PE=4 SV=1 - [K7ES20_HUMAN]	0	0	0	0	0	0	0	0.949037	0.316346	0.547927	0.211325
K7ESG9	Nuclear factor 1 X-type (Fragment) OS=Homo sapiens GN=NFIX PE=4 SV=1 - [K7ESG9_HUMAN]	0	0	0	0	0	0	0.967055	0	0.322352	0.55833	0.211325
K7ESK7	SUMO-activating enzyme subunit 2 (Fragment) OS=Homo sapiens GN=UBA2 PE=4 SV=1 - [K7ESK7_HUMAN]	0	0	0	0	0	0	0.967055	0	0.322352	0.55833	0.211325
K7ESL0	Spermidine synthase (Fragment) OS=Homo sapiens GN=SRM PE=3 SV=1 - [K7ESL0_HUMAN]	0	0	0	0	0	0	0	0.949037	0.316346	0.547927	0.211325
K7N799	Alanyl-tRNA-editing protein Aarsd1 OS=Homo sapiens GN=AARSD1 PE=4 SV=1 - [K7N799_HUMAN]	0	0	0	0	0	0	0.967055	0	0.322352	0.55833	0.211325
K9J7I2	Uncharacterized protein OS=Homo sapiens PE=4 SV=1 - [K9J7I2_HUMAN]	0	0	0	0	0	4.89065	0	0	1.63022	2.82362	0.211325
M0QX43	Deoxyhypusine synthase OS=Homo sapiens GN=DHPS PE=4 SV=1 - [M0QX43_HUMAN]	0	0	0	0	0	0	0	0.949037	0.316346	0.547927	0.211325
M0QX69	NEDD8-conjugating enzyme Ubc12 (Fragment) OS=Homo sapiens GN=UBE2M PE=3 SV=1 - [M0QX69_HUMAN]	0	0	0	0	0	2.93439	0	0	0.978129	1.69417	0.211325
M0QXC8	Interferon regulatory factor 3 (Fragment) OS=Homo sapiens GN=IRF3 PE=4 SV=1 - [M0QXC8_HUMAN]	0	0	0	0	0	0.978129	0	0	0.326043	0.564723	0.211325
M0QXQ4	Numb-like protein (Fragment) OS=Homo sapiens GN=NUMBL PE=4 SV=1 - [M0QXQ4_HUMAN]	0	0	0	0	0	0.978129	0	0	0.326043	0.564723	0.211325
M0QXS5	Heterogeneous nuclear ribonucleoprotein L (Fragment) OS=Homo sapiens GN=HNRNPL PE=4 SV=1 - [M0QXS5_HUMAN]	0	0	0	0	0	24.4532	0	0	8.15108	14.1181	0.211325
M0QXZ6	Glia maturation factor gamma (Fragment) OS=Homo sapiens GN=GMFG PE=4 SV=1 - [M0QXZ6_HUMAN]	0	0	0	0	0	0	0	0.949037	0.316346	0.547927	0.211325
M0QY80	Protein ETHE1, mitochondrial OS=Homo sapiens GN=ETHE1 PE=4 SV=1 - [M0QY80_HUMAN]	0	0	0	0	0	5.86877	0	0	1.95626	3.38834	0.211325
M0QYB0	FERM, RhoGEF and pleckstrin domain-containing protein 1 (Fragment) OS=Homo sapiens GN=FARP1 PE=4 SV=1 - [M0QYB0_HUMAN]	0	0	0	0	0	0	1.93411	0	0.644704	1.11666	0.211325
M0QYB8	Reticulocalbin-3 (Fragment) OS=Homo sapiens GN=RCN3 PE=4 SV=1 - [M0QYB8_HUMAN]	0	0	0	0	0	0	3.86822	0	1.28941	2.23332	0.211325
M0QYH2	Bifunctional polynucleotide phosphatase/kinase OS=Homo sapiens GN=PNKP PE=4 SV=1 - [M0QYH2_HUMAN]	0	0	0	0	0	1.95626	1.93411	1.89807	1.92948	0.0293673	3.86052e-05
M0QYM8	SUMO-activating enzyme subunit 1 (Fragment) OS=Homo sapiens GN=SAE1 PE=4 SV=1 - [M0QYM8_HUMAN]	0	0	0	0	0	0	0	0.949037	0.316346	0.547927	0.211325
M0QZ93	Galectin-4 (Fragment) OS=Homo sapiens GN=LGALS4 PE=4 SV=1 - [M0QZ93_HUMAN]	0	0	0	0	0	0	0	0.949037	0.316346	0.547927	0.211325
M0QZD9	Bromodomain-containing protein 4 (Fragment) OS=Homo sapiens GN=BRD4 PE=4 SV=1 - [M0QZD9_HUMAN]	0	0	0	0	0	0.978129	0	1.89807	0.958734	0.949185	0.111157
M0QZG7	U1 small nuclear ribonucleoprotein A (Fragment) OS=Homo sapiens GN=SNRPA PE=4 SV=1 - [M0QZG7_HUMAN]	0	0	0	0	0	10.7594	4.83528	5.69422	7.09631	3.20129	0.0308159
M0QZH8	Rho guanine nucleotide exchange factor 1 (Fragment) OS=Homo sapiens GN=ARHGEF1 PE=4 SV=1 - [M0QZH8_HUMAN]	0	0	0	0	0	0	0	0.949037	0.316346	0.547927	0.211325
M0QZP8	Immunity-related GTPase family Q protein (Fragment) OS=Homo sapiens GN=IRGQ PE=4 SV=1 - [M0QZP8_HUMAN]	0	0	0	0	0	0	0.967055	0	0.322352	0.55833	0.211325
M0QZU2	Uncharacterized protein OS=Homo sapiens PE=4 SV=1 - [M0QZU2_HUMAN]	0	0	0	0	0	0	0.967055	0	0.322352	0.55833	0.211325
M0R080	DnaJ homolog subfamily B member 1 (Fragment) OS=Homo sapiens GN=DNAJB1 PE=4 SV=1 - [M0R080_HUMAN]	0	0	0	0	0	0	0	2.84711	0.949037	1.64378	0.211325
M0R0A9	IgG receptor FcRn large subunit p51 OS=Homo sapiens GN=FCGRT PE=4 SV=1 - [M0R0A9_HUMAN]	0	0	0	0	0	0	0	1.89807	0.632691	1.09585	0.211325
M0R0P4	Striatin-4 (Fragment) OS=Homo sapiens GN=STRN4 PE=4 SV=2 - [M0R0P4_HUMAN]	0	0	0	0	0	0	0	0.949037	0.316346	0.547927	0.211325
M0R0R3	Small integral membrane protein 7 OS=Homo sapiens GN=SMIM7 PE=4 SV=1 - [M0R0R3_HUMAN]	0	0	0	0	0	0	0.967055	0	0.322352	0.55833	0.211325
M0R122	Epithelial membrane protein 3 OS=Homo sapiens GN=EMP3 PE=4 SV=1 - [M0R122_HUMAN]	0	0	0	0	0	0.978129	0.967055	1.89807	1.28109	0.534356	0.0266959
M0R128	DnaJ homolog subfamily B member 1 (Fragment) OS=Homo sapiens GN=DNAJB1 PE=4 SV=1 - [M0R128_HUMAN]	0	0	0	0	0	0	0.967055	0	0.322352	0.55833	0.211325
M0R133	Zinc finger protein 574 (Fragment) OS=Homo sapiens GN=ZNF574 PE=4 SV=1 - [M0R133_HUMAN]	0	0	0	0	0	0.978129	0	0	0.326043	0.564723	0.211325
M0R1C2	Symplekin (Fragment) OS=Homo sapiens GN=SYMPK PE=4 SV=1 - [M0R1C2_HUMAN]	0	0	0	0	0	0	0	0.949037	0.316346	0.547927	0.211325
M0R1C6	Upstream stimulatory factor 2 (Fragment) OS=Homo sapiens GN=USF2 PE=4 SV=1 - [M0R1C6_HUMAN]	0	0	0	0	0	0	0.967055	0	0.322352	0.55833	0.211325
M0R1E0	Ras-related protein Rab-4B (Fragment) OS=Homo sapiens GN=RAB4B PE=3 SV=1 - [M0R1E0_HUMAN]	0	0	0	0	0	0	18.3741	13.2865	10.5535	9.48701	0.0969225
M0R292	Zinc finger protein 546 (Fragment) OS=Homo sapiens GN=ZNF546 PE=4 SV=1 - [M0R292_HUMAN]	0	0	0	0	0	0	0.967055	0	0.322352	0.55833	0.211325
M0R374	PNMA-like protein 2 OS=Homo sapiens GN=PNMAL2 PE=4 SV=1 - [M0R374_HUMAN]	0	0	0	0	0	0	0.967055	0	0.322352	0.55833	0.211325
M0R389	Platelet-activating factor acetylhydrolase IB subunit gamma (Fragment) OS=Homo sapiens GN=PAFAH1B3 PE=4 SV=1 - [M0R389_HUMAN]	0	0	0	0	0	0	0	1.89807	0.632691	1.09585	0.211325
M0R3D0	HCG1787699 OS=Homo sapiens GN=hCG_1787699 PE=4 SV=1 - [M0R3D0_HUMAN]	0	0	0	0	0	0.978129	0.967055	0	0.648395	0.561554	0.0917583
M0R3F4	BRISC and BRCA1-A complex member 1 (Fragment) OS=Homo sapiens GN=BABAM1 PE=4 SV=1 - [M0R3F4_HUMAN]	0	0	0	0	0	0	0	1.89807	0.632691	1.09585	0.211325
M0R3F6	SURP and G-patch domain-containing protein 2 OS=Homo sapiens GN=SUGP2 PE=4 SV=1 - [M0R3F6_HUMAN]	0	0	0	0	0	1.95626	1.93411	0.949037	1.61314	0.575233	0.0199343
O00154-2	Isoform 2 of Cytosolic acyl coenzyme A thioester hydrolase OS=Homo sapiens GN=ACOT7 - [BACH_HUMAN]	0	0	0	0	0	0	0	0.949037	0.316346	0.547927	0.211325
O00160	Unconventional myosin-If OS=Homo sapiens GN=MYO1F PE=1 SV=3 - [MYO1F_HUMAN]	0	0	0	0	0	0	1.93411	2.84711	1.59374	1.45375	0.0989973
O00187-2	Isoform 2 of Mannan-binding lectin serine protease 2 OS=Homo sapiens GN=MASP2 - [MASP2_HUMAN]	0	0	0	0	0	0	0.967055	0	0.322352	0.55833	0.211325
O00425	Insulin-like growth factor 2 mRNA-binding protein 3 OS=Homo sapiens GN=IGF2BP3 PE=1 SV=2 - [IF2B3_HUMAN]	0	0	0	0	0	0	0.967055	0.949037	0.638697	0.553201	0.0917698
O00425-2	Isoform 2 of Insulin-like growth factor 2 mRNA-binding protein 3 OS=Homo sapiens GN=IGF2BP3 - [IF2B3_HUMAN]	0	0	0	0	0	0.978129	0	0	0.326043	0.564723	0.211325
O00459	Phosphatidylinositol 3-kinase regulatory subunit beta OS=Homo sapiens GN=PIK3R2 PE=1 SV=2 - [P85B_HUMAN]	0	0	0	0	0	1.95626	0	0	0.652086	1.12945	0.211325
O00712	Nuclear factor 1 B-type OS=Homo sapiens GN=NFIB PE=1 SV=2 - [NFIB_HUMAN]	0	0	0	0	0	0.978129	0	0	0.326043	0.564723	0.211325
O00764-3	Isoform 3 of Pyridoxal kinase OS=Homo sapiens GN=PDXK - [PDXK_HUMAN]	0	0	0	0	0	3.91252	0	0	1.30417	2.25889	0.211325
O14525-3	Isoform 3 of Astrotactin-1 OS=Homo sapiens GN=ASTN1 - [ASTN1_HUMAN]	0	0	0	0	0	0.978129	0	0	0.326043	0.564723	0.211325
O14529	Homeobox protein cut-like 2 OS=Homo sapiens GN=CUX2 PE=1 SV=4 - [CUX2_HUMAN]	0	0	0	0	0	0	1.93411	0.949037	0.961049	0.967111	0.113678
O14578-3	Isoform 3 of Citron Rho-interacting kinase OS=Homo sapiens GN=CIT - [CTRO_HUMAN]	0	0	0	0	0	0	0.967055	0	0.322352	0.55833	0.211325
O14657	Torsin-1B OS=Homo sapiens GN=TOR1B PE=1 SV=2 - [TOR1B_HUMAN]	0	0	0	0	0	0.978129	0	0.949037	0.642389	0.556515	0.0917982
O14662-3	Isoform C of Syntaxin-16 OS=Homo sapiens GN=STX16 - [STX16_HUMAN]	0	0	0	0	0	0	0.967055	0	0.322352	0.55833	0.211325
O14974-4	Isoform 4 of Protein phosphatase 1 regulatory subunit 12A OS=Homo sapiens GN=PPP1R12A - [MYPT1_HUMAN]	0	0	0	0	0	14.6719	0	0	4.89065	8.47085	0.211325
O15020-2	Isoform 2 of Spectrin beta chain, non-erythrocytic 2 OS=Homo sapiens GN=SPTBN2 - [SPTN2_HUMAN]	0	0	0	0	0	16.6282	18.3741	18.0317	17.678	0.925117	0.000455809
O15034-2	Isoform 2 of RIMS-binding protein 2 OS=Homo sapiens GN=RIMBP2 - [RIMB2_HUMAN]	0	0	0	0	0	0	0.967055	0	0.322352	0.55833	0.211325
O15075-2	Isoform 1 of Serine/threonine-protein kinase DCLK1 OS=Homo sapiens GN=DCLK1 - [DCLK1_HUMAN]	0	0	0	0	0	1.95626	0	0	0.652086	1.12945	0.211325
O15083	ERC protein 2 OS=Homo sapiens GN=ERC2 PE=1 SV=3 - [ERC2_HUMAN]	0	0	0	0	0	0	5.80233	0	1.93411	3.34998	0.211325
O15111	Inhibitor of nuclear factor kappa-B kinase subunit alpha OS=Homo sapiens GN=CHUK PE=1 SV=2 - [IKKA_HUMAN]	0	0	0	0	0	0	0.967055	0	0.322352	0.55833	0.211325
O15164-2	Isoform Short of Transcription intermediary factor 1-alpha OS=Homo sapiens GN=TRIM24 - [TIF1A_HUMAN]	0	0	0	0	0	0.978129	0	0	0.326043	0.564723	0.211325
O15270	Serine palmitoyltransferase 2 OS=Homo sapiens GN=SPTLC2 PE=1 SV=1 - [SPTC2_HUMAN]	0	0	0	0	0	0	0.967055	0	0.322352	0.55833	0.211325
O15303	Metabotropic glutamate receptor 6 OS=Homo sapiens GN=GRM6 PE=1 SV=2 - [GRM6_HUMAN]	0	0	0	0	0	0	0.967055	0	0.322352	0.55833	0.211325
O15320-8	Isoform 9 of cTAGE family member 5 OS=Homo sapiens GN=CTAGE5 - [CTGE5_HUMAN]	0	0	0	0	0	0	7.73644	0	2.57881	4.46664	0.211325
O15455	Toll-like receptor 3 OS=Homo sapiens GN=TLR3 PE=1 SV=1 - [TLR3_HUMAN]	0	0	0	0	0	3.91252	4.83528	2.84711	3.86497	0.994936	0.0106916
O43143	Putative pre-mRNA-splicing factor ATP-dependent RNA helicase DHX15 OS=Homo sapiens GN=DHX15 PE=1 SV=2 - [DHX15_HUMAN]	0	0	0	0	0	0.978129	0	0	0.326043	0.564723	0.211325
O43149-3	Isoform 3 of Zinc finger ZZ-type and EF-hand domain-containing protein 1 OS=Homo sapiens GN=ZZEF1 - [ZZEF1_HUMAN]	0	0	0	0	0	0	0.967055	0	0.322352	0.55833	0.211325
O43167	Zinc finger and BTB domain-containing protein 24 OS=Homo sapiens GN=ZBTB24 PE=1 SV=2 - [ZBT24_HUMAN]	0	0	0	0	0	0	0	0.949037	0.316346	0.547927	0.211325
O43290	U4/U6.U5 tri-snRNP-associated protein 1 OS=Homo sapiens GN=SART1 PE=1 SV=1 - [SNUT1_HUMAN]	0	0	0	0	0	3.91252	3.86822	0.949037	2.90992	1.69832	0.0486298
O43293	Death-associated protein kinase 3 OS=Homo sapiens GN=DAPK3 PE=1 SV=1 - [DAPK3_HUMAN]	0	0	0	0	0	1.95626	0	1.89807	1.28478	1.11303	0.0917982
O43310	CBP80/20-dependent translation initiation factor OS=Homo sapiens GN=CTIF PE=1 SV=1 - [CTIF_HUMAN]	0	0	0	0	0	0.978129	0	0	0.326043	0.564723	0.211325
O43451	Maltase-glucoamylase, intestinal OS=Homo sapiens GN=MGAM PE=1 SV=5 - [MGA_HUMAN]	0	0	0	0	0	2.93439	0	1.89807	1.61082	1.48813	0.100827
O43464-4	Isoform 4 of Serine protease HTRA2, mitochondrial OS=Homo sapiens GN=HTRA2 - [HTRA2_HUMAN]	0	0	0	0	0	0	0	1.89807	0.632691	1.09585	0.211325
O43493-2	Isoform TGN46 of Trans-Golgi network integral membrane protein 2 OS=Homo sapiens GN=TGOLN2 - [TGON2_HUMAN]	0	0	0	0	0	0	5.80233	4.74518	3.51584	3.09034	0.0937869
O43719	HIV Tat-specific factor 1 OS=Homo sapiens GN=HTATSF1 PE=1 SV=1 - [HTSF1_HUMAN]	0	0	0	0	0	1.95626	0.967055	0	0.974438	0.97815	0.113292
O43815	Striatin OS=Homo sapiens GN=STRN PE=1 SV=4 - [STRN_HUMAN]	0	0	0	0	0	0	0	1.89807	0.632691	1.09585	0.211325
O43823	A-kinase anchor protein 8 OS=Homo sapiens GN=AKAP8 PE=1 SV=1 - [AKAP8_HUMAN]	0	0	0	0	0	0.978129	0	0.949037	0.642389	0.556515	0.0917982
O43852-2	Isoform 2 of Calumenin OS=Homo sapiens GN=CALU - [CALU_HUMAN]	0	0	0	0	0	14.6719	0	0	4.89065	8.47085	0.211325
O43854-2	Isoform 2 of EGF-like repeat and discoidin I-like domain-containing protein 3 OS=Homo sapiens GN=EDIL3 - [EDIL3_HUMAN]	0	0	0	0	0	0	0.967055	2.84711	1.27139	1.44775	0.13382
O43866	CD5 antigen-like OS=Homo sapiens GN=CD5L PE=1 SV=1 - [CD5L_HUMAN]	0	0	0	0	0	0.978129	0	0	0.326043	0.564723	0.211325
O43914-3	Isoform 3 of TYRO protein tyrosine kinase-binding protein OS=Homo sapiens GN=TYROBP - [TYOBP_HUMAN]	0	0	0	0	0	0.978129	0.967055	0.949037	0.96474	0.0146837	3.86052e-05
O60264	SWI/SNF-related matrix-associated actin-dependent regulator of chromatin subfamily A member 5 OS=Homo sapiens GN=SMARCA5 PE=1 SV=1 - [SMCA5_HUMAN]	0	0	0	0	0	1.95626	0	1.89807	1.28478	1.11303	0.0917982
O60299-2	Isoform 2 of Leucine zipper putative tumor suppressor 3 OS=Homo sapiens GN=LZTS3 - [LZTS3_HUMAN]	0	0	0	0	0	0	0	0.949037	0.316346	0.547927	0.211325
O60333-3	Isoform 3 of Kinesin-like protein KIF1B OS=Homo sapiens GN=KIF1B - [KIF1B_HUMAN]	0	0	0	0	0	4.89065	0	0	1.63022	2.82362	0.211325
O60477-3	Isoform 3 of Deleted in bladder cancer protein 1 OS=Homo sapiens GN=DBC1 - [DBC1_HUMAN]	0	0	0	0	0	0	0	0.949037	0.316346	0.547927	0.211325
O60486	Plexin-C1 OS=Homo sapiens GN=PLXNC1 PE=1 SV=1 - [PLXC1_HUMAN]	0	0	0	0	0	0	3.86822	0	1.28941	2.23332	0.211325
O60487	Myelin protein zero-like protein 2 OS=Homo sapiens GN=MPZL2 PE=1 SV=1 - [MPZL2_HUMAN]	0	0	0	0	0	0.978129	0	0.949037	0.642389	0.556515	0.0917982
O60488-2	Isoform Short of Long-chain-fatty-acid--CoA ligase 4 OS=Homo sapiens GN=ACSL4 - [ACSL4_HUMAN]	0	0	0	0	0	0.978129	0	0	0.326043	0.564723	0.211325
O60504	Vinexin OS=Homo sapiens GN=SORBS3 PE=1 SV=2 - [VINEX_HUMAN]	0	0	0	0	0	2.93439	0	7.59229	3.50889	3.82861	0.126667
O60568	Procollagen-lysine,2-oxoglutarate 5-dioxygenase 3 OS=Homo sapiens GN=PLOD3 PE=1 SV=1 - [PLOD3_HUMAN]	0	0	0	0	0	11.7375	12.5717	11.3884	11.8992	0.607984	0.000434538
O60716-16	Isoform 2 of Catenin delta-1 OS=Homo sapiens GN=CTNND1 - [CTND1_HUMAN]	0	0	0	0	0	34.2345	0	0	11.4115	19.7653	0.211325
O60716-24	Isoform 3 of Catenin delta-1 OS=Homo sapiens GN=CTNND1 - [CTND1_HUMAN]	0	0	0	0	0	0	29.0117	0	9.67055	16.7499	0.211325
O60762	Dolichol-phosphate mannosyltransferase OS=Homo sapiens GN=DPM1 PE=1 SV=1 - [DPM1_HUMAN]	0	0	0	0	0	0.978129	0.967055	0.949037	0.96474	0.0146837	3.86052e-05
O60812	Heterogeneous nuclear ribonucleoprotein C-like 1 OS=Homo sapiens GN=HNRNPCL1 PE=1 SV=1 - [HNRCL_HUMAN]	0	0	0	0	0	0	31.9128	0	10.6376	18.4249	0.211325
O60832	H/ACA ribonucleoprotein complex subunit 4 OS=Homo sapiens GN=DKC1 PE=1 SV=3 - [DKC1_HUMAN]	0	0	0	0	0	1.95626	1.93411	1.89807	1.92948	0.0293673	3.86052e-05
O75019-2	Isoform 2 of Leukocyte immunoglobulin-like receptor subfamily A member 1 OS=Homo sapiens GN=LILRA1 - [LIRA1_HUMAN]	0	0	0	0	0	0	0	0.949037	0.316346	0.547927	0.211325
O75063	Glycosaminoglycan xylosylkinase OS=Homo sapiens GN=FAM20B PE=1 SV=1 - [XYLK_HUMAN]	0	0	0	0	0	0	0.967055	0	0.322352	0.55833	0.211325
O75081-2	Isoform 2 of Protein CBFA2T3 OS=Homo sapiens GN=CBFA2T3 - [MTG16_HUMAN]	0	0	0	0	0	0.978129	0	0	0.326043	0.564723	0.211325
O75094-2	Isoform 2 of Slit homolog 3 protein OS=Homo sapiens GN=SLIT3 - [SLIT3_HUMAN]	0	0	0	0	0	2.93439	4.83528	4.74518	4.17162	1.07242	0.0106635
O75110	Probable phospholipid-transporting ATPase IIA OS=Homo sapiens GN=ATP9A PE=1 SV=3 - [ATP9A_HUMAN]	0	0	0	0	0	0	0.967055	0	0.322352	0.55833	0.211325
O75382-3	Isoform Gamma of Tripartite motif-containing protein 3 OS=Homo sapiens GN=TRIM3 - [TRIM3_HUMAN]	0	0	0	0	0	0	0	0.949037	0.316346	0.547927	0.211325
O75385	Serine/threonine-protein kinase ULK1 OS=Homo sapiens GN=ULK1 PE=1 SV=2 - [ULK1_HUMAN]	0	0	0	0	0	0	0.967055	0	0.322352	0.55833	0.211325
O75410-8	Isoform 8 of Transforming acidic coiled-coil-containing protein 1 OS=Homo sapiens GN=TACC1 - [TACC1_HUMAN]	0	0	0	0	0	0	0	0.949037	0.316346	0.547927	0.211325
O75414-2	Isoform 2 of Nucleoside diphosphate kinase 6 OS=Homo sapiens GN=NME6 - [NDK6_HUMAN]	0	0	0	0	0	0.978129	0	0	0.326043	0.564723	0.211325
O75425-3	Isoform 3 of Motile sperm domain-containing protein 3 OS=Homo sapiens GN=MOSPD3 - [MSPD3_HUMAN]	0	0	0	0	0	0.978129	0	0	0.326043	0.564723	0.211325
O75475-3	Isoform 3 of PC4 and SFRS1-interacting protein OS=Homo sapiens GN=PSIP1 - [PSIP1_HUMAN]	0	0	0	0	0	0	0	7.59229	2.53076	4.38341	0.211325
O75503	Ceroid-lipofuscinosis neuronal protein 5 OS=Homo sapiens GN=CLN5 PE=1 SV=2 - [CLN5_HUMAN]	0	0	0	0	0	0.978129	0	0	0.326043	0.564723	0.211325
O75506	Heat shock factor-binding protein 1 OS=Homo sapiens GN=HSBP1 PE=1 SV=1 - [HSBP1_HUMAN]	0	0	0	0	0	0.978129	0	0.949037	0.642389	0.556515	0.0917982
O75556	Mammaglobin-B OS=Homo sapiens GN=SCGB2A1 PE=1 SV=1 - [SG2A1_HUMAN]	0	0	0	0	0	0.978129	0	0	0.326043	0.564723	0.211325
O75592-2	Isoform 2 of Probable E3 ubiquitin-protein ligase MYCBP2 OS=Homo sapiens GN=MYCBP2 - [MYCB2_HUMAN]	0	0	0	0	0	0	1.93411	0	0.644704	1.11666	0.211325
O75618	Death effector domain-containing protein OS=Homo sapiens GN=DEDD PE=1 SV=1 - [DEDD_HUMAN]	0	0	0	0	0	0	0.967055	0.949037	0.638697	0.553201	0.0917698
O75643	U5 small nuclear ribonucleoprotein 200 kDa helicase OS=Homo sapiens GN=SNRNP200 PE=1 SV=2 - [U520_HUMAN]	0	0	0	0	0	0	2.90117	0	0.967055	1.67499	0.211325
O75747	Phosphatidylinositol 4-phosphate 3-kinase C2 domain-containing subunit gamma OS=Homo sapiens GN=PIK3C2G PE=1 SV=3 - [P3C2G_HUMAN]	0	0	0	0	0	0.978129	0	0	0.326043	0.564723	0.211325
O75792	Ribonuclease H2 subunit A OS=Homo sapiens GN=RNASEH2A PE=1 SV=2 - [RNH2A_HUMAN]	0	0	0	0	0	0.978129	0.967055	0	0.648395	0.561554	0.0917583
O75828	Carbonyl reductase [NADPH] 3 OS=Homo sapiens GN=CBR3 PE=1 SV=3 - [CBR3_HUMAN]	0	0	0	0	0	21.5188	24.1764	0	15.2317	13.2578	0.0924404
O75844	CAAX prenyl protease 1 homolog OS=Homo sapiens GN=ZMPSTE24 PE=1 SV=2 - [FACE1_HUMAN]	0	0	0	0	0	0.978129	0	0.949037	0.642389	0.556515	0.0917982
O75881	25-hydroxycholesterol 7-alpha-hydroxylase OS=Homo sapiens GN=CYP7B1 PE=1 SV=2 - [CP7B1_HUMAN]	0	0	0	0	0	0.978129	0	0.949037	0.642389	0.556515	0.0917982
O75899	Gamma-aminobutyric acid type B receptor subunit 2 OS=Homo sapiens GN=GABBR2 PE=1 SV=1 - [GABR2_HUMAN]	0	0	0	0	0	0	0.967055	0	0.322352	0.55833	0.211325
O75915	PRA1 family protein 3 OS=Homo sapiens GN=ARL6IP5 PE=1 SV=1 - [PRAF3_HUMAN]	0	0	0	0	0	10.7594	9.67055	0	6.80999	5.9227	0.0923303
O75923-3	Isoform 3 of Dysferlin OS=Homo sapiens GN=DYSF - [DYSF_HUMAN]	0	0	0	0	0	9.78129	0	0	3.26043	5.64723	0.211325
O75955	Flotillin-1 OS=Homo sapiens GN=FLOT1 PE=1 SV=3 - [FLOT1_HUMAN]	0	0	0	0	0	0	11.6047	0	3.86822	6.69996	0.211325
O75976-2	Isoform 2 of Carboxypeptidase D OS=Homo sapiens GN=CPD - [CBPD_HUMAN]	0	0	0	0	0	0.978129	0	0	0.326043	0.564723	0.211325
O76013-2	Isoform 2 of Keratin, type I cuticular Ha6 OS=Homo sapiens GN=KRT36 - [KRT36_HUMAN]	0	0	0	0	0	0	0	7.59229	2.53076	4.38341	0.211325
O76027	Annexin A9 OS=Homo sapiens GN=ANXA9 PE=1 SV=3 - [ANXA9_HUMAN]	0	0	0	0	0	0.978129	0	0	0.326043	0.564723	0.211325
O76038	Secretagogin OS=Homo sapiens GN=SCGN PE=1 SV=2 - [SEGN_HUMAN]	0	0	0	0	0	11.7375	10.6376	15.1846	12.5199	2.3723	0.00587861
O76083-5	Isoform PDE9A5 of High affinity cGMP-specific 3',5'-cyclic phosphodiesterase 9A OS=Homo sapiens GN=PDE9A - [PDE9A_HUMAN]	0	0	0	0	0	0.978129	0	0	0.326043	0.564723	0.211325
O94760-2	Isoform 2 of N(G),N(G)-dimethylarginine dimethylaminohydrolase 1 OS=Homo sapiens GN=DDAH1 - [DDAH1_HUMAN]	0	0	0	0	0	0	0	24.675	8.22498	14.2461	0.211325
O94776	Metastasis-associated protein MTA2 OS=Homo sapiens GN=MTA2 PE=1 SV=1 - [MTA2_HUMAN]	0	0	0	0	0	2.93439	1.93411	2.84711	2.57187	0.554036	0.00755946
O94782	Ubiquitin carboxyl-terminal hydrolase 1 OS=Homo sapiens GN=USP1 PE=1 SV=1 - [UBP1_HUMAN]	0	0	0	0	0	0.978129	0	0	0.326043	0.564723	0.211325
O94788	Retinal dehydrogenase 2 OS=Homo sapiens GN=ALDH1A2 PE=1 SV=3 - [AL1A2_HUMAN]	0	0	0	0	0	0	0	6.64326	2.21442	3.83549	0.211325
O94875-2	Isoform 2 of Sorbin and SH3 domain-containing protein 2 OS=Homo sapiens GN=SORBS2 - [SRBS2_HUMAN]	0	0	0	0	0	55.7534	0	0	18.5845	32.1892	0.211325
O94875-7	Isoform 7 of Sorbin and SH3 domain-containing protein 2 OS=Homo sapiens GN=SORBS2 - [SRBS2_HUMAN]	0	0	0	0	0	0	51.2539	0	17.0846	29.5915	0.211325
O94901-5	Isoform 5 of SUN domain-containing protein 1 OS=Homo sapiens GN=SUN1 - [SUN1_HUMAN]	0	0	0	0	0	12.7157	12.5717	15.1846	13.4907	1.46875	0.00196387
O94905	Erlin-2 OS=Homo sapiens GN=ERLIN2 PE=1 SV=1 - [ERLN2_HUMAN]	0	0	0	0	0	0	0	22.7769	7.59229	13.1502	0.211325
O94986-1	Isoform 1 of Centrosomal protein of 152 kDa OS=Homo sapiens GN=CEP152 - [CE152_HUMAN]	0	0	0	0	0	0	0	0.949037	0.316346	0.547927	0.211325
O95140-2	Isoform 2 of Mitofusin-2 OS=Homo sapiens GN=MFN2 - [MFN2_HUMAN]	0	0	0	0	0	0	0	0.949037	0.316346	0.547927	0.211325
O95159	Zinc finger protein-like 1 OS=Homo sapiens GN=ZFPL1 PE=1 SV=2 - [ZFPL1_HUMAN]	0	0	0	0	0	1.95626	0.967055	0	0.974438	0.97815	0.113292
O95164	Ubiquitin-like protein 3 OS=Homo sapiens GN=UBL3 PE=1 SV=1 - [UBL3_HUMAN]	0	0	0	0	0	0.978129	0	0	0.326043	0.564723	0.211325
O95171-3	Isoform 3 of Sciellin OS=Homo sapiens GN=SCEL - [SCEL_HUMAN]	0	0	0	0	0	0.978129	0.967055	0	0.648395	0.561554	0.0917583
O95210	Starch-binding domain-containing protein 1 OS=Homo sapiens GN=STBD1 PE=1 SV=1 - [STBD1_HUMAN]	0	0	0	0	0	1.95626	0	1.89807	1.28478	1.11303	0.0917982
O95294-2	Isoform 2 of RasGAP-activating-like protein 1 OS=Homo sapiens GN=RASAL1 - [RASL1_HUMAN]	0	0	0	0	0	0.978129	0	2.84711	1.27508	1.4466	0.133193
O95297-4	Isoform 4 of Myelin protein zero-like protein 1 OS=Homo sapiens GN=MPZL1 - [MPZL1_HUMAN]	0	0	0	0	0	1.95626	0	1.89807	1.28478	1.11303	0.0917982
O95363	Phenylalanine--tRNA ligase, mitochondrial OS=Homo sapiens GN=FARS2 PE=1 SV=1 - [SYFM_HUMAN]	0	0	0	0	0	1.95626	0	0.949037	0.968432	0.978273	0.114274
O95376	E3 ubiquitin-protein ligase ARIH2 OS=Homo sapiens GN=ARIH2 PE=1 SV=1 - [ARI2_HUMAN]	0	0	0	0	0	0.978129	0	0	0.326043	0.564723	0.211325
O95396	Adenylyltransferase and sulfurtransferase MOCS3 OS=Homo sapiens GN=MOCS3 PE=1 SV=1 - [MOCS3_HUMAN]	0	0	0	0	0	0.978129	0	0	0.326043	0.564723	0.211325
O95428-2	Isoform 2 of Papilin OS=Homo sapiens GN=PAPLN - [PPN_HUMAN]	0	0	0	0	0	0.978129	0	0	0.326043	0.564723	0.211325
O95716	Ras-related protein Rab-3D OS=Homo sapiens GN=RAB3D PE=1 SV=1 - [RAB3D_HUMAN]	0	0	0	0	0	13.6938	15.4729	13.2865	14.1511	1.1627	0.00112135
O95751	Protein LDOC1 OS=Homo sapiens GN=LDOC1 PE=1 SV=1 - [LDOC1_HUMAN]	0	0	0	0	0	0	0.967055	0	0.322352	0.55833	0.211325
O95758-1	Isoform 1 of Polypyrimidine tract-binding protein 3 OS=Homo sapiens GN=PTBP3 - [PTBP3_HUMAN]	0	0	0	0	0	8.80316	6.76939	6.64326	7.40527	1.21225	0.00440739
O95786	Probable ATP-dependent RNA helicase DDX58 OS=Homo sapiens GN=DDX58 PE=1 SV=2 - [DDX58_HUMAN]	0	0	0	0	0	0	0	2.84711	0.949037	1.64378	0.211325
O95786-2	Isoform 2 of Probable ATP-dependent RNA helicase DDX58 OS=Homo sapiens GN=DDX58 - [DDX58_HUMAN]	0	0	0	0	0	1.95626	1.93411	0	1.29679	1.12311	0.0917583
O95816	BAG family molecular chaperone regulator 2 OS=Homo sapiens GN=BAG2 PE=1 SV=1 - [BAG2_HUMAN]	0	0	0	0	0	4.89065	1.93411	0.949037	2.59126	2.05133	0.0800822
O95999	B-cell lymphoma/leukemia 10 OS=Homo sapiens GN=BCL10 PE=1 SV=1 - [BCL10_HUMAN]	0	0	0	0	0	1.95626	0	0	0.652086	1.12945	0.211325
P00390-4	Isoform 3 of Glutathione reductase, mitochondrial OS=Homo sapiens GN=GSR - [GSHR_HUMAN]	0	0	0	0	0	0	0	5.69422	1.89807	3.28756	0.211325
P00533	Epidermal growth factor receptor OS=Homo sapiens GN=EGFR PE=1 SV=2 - [EGFR_HUMAN]	0	0	0	0	0	14.6719	14.5058	0	9.72592	8.4233	0.0917583
P00750-2	Isoform 2 of Tissue-type plasminogen activator OS=Homo sapiens GN=PLAT - [TPA_HUMAN]	0	0	0	0	0	0	0.967055	0	0.322352	0.55833	0.211325
P00813	Adenosine deaminase OS=Homo sapiens GN=ADA PE=1 SV=3 - [ADA_HUMAN]	0	0	0	0	0	0	5.80233	5.69422	3.83218	3.31921	0.0917698
P01137	Transforming growth factor beta-1 OS=Homo sapiens GN=TGFB1 PE=1 SV=2 - [TGFB1_HUMAN]	0	0	0	0	0	3.91252	2.90117	1.89807	2.90392	1.00722	0.01892
P01593	Ig kappa chain V-I region AG OS=Homo sapiens PE=1 SV=1 - [KV101_HUMAN]	0	0	0	0	0	0	0	8.54133	2.84711	4.93134	0.211325
P01596	Ig kappa chain V-I region CAR OS=Homo sapiens PE=1 SV=1 - [KV104_HUMAN]	0	0	0	0	0	0	5.80233	0	1.93411	3.34998	0.211325
P01601	Ig kappa chain V-I region HK101 (Fragment) OS=Homo sapiens PE=4 SV=1 - [KV109_HUMAN]	0	0	0	0	0	0.978129	0	0	0.326043	0.564723	0.211325
P01608	Ig kappa chain V-I region Roy OS=Homo sapiens PE=1 SV=1 - [KV116_HUMAN]	0	0	0	0	0	6.8469	0	0	2.2823	3.95306	0.211325
P01613	Ig kappa chain V-I region Ni OS=Homo sapiens PE=1 SV=1 - [KV121_HUMAN]	0	0	0	0	0	0	1.93411	0	0.644704	1.11666	0.211325
P01625	Ig kappa chain V-IV region Len OS=Homo sapiens PE=1 SV=2 - [KV402_HUMAN]	0	0	0	0	0	0	6.76939	0	2.25646	3.90831	0.211325
P01708	Ig lambda chain V-II region BUR OS=Homo sapiens PE=1 SV=1 - [LV205_HUMAN]	0	0	0	0	0	0	0.967055	0	0.322352	0.55833	0.211325
P01719	Ig lambda chain V-V region DEL OS=Homo sapiens PE=1 SV=1 - [LV501_HUMAN]	0	0	0	0	0	0.978129	0	0	0.326043	0.564723	0.211325
P01744	Ig heavy chain V-I region ND (Fragments) OS=Homo sapiens PE=1 SV=2 - [HV104_HUMAN]	0	0	0	0	0	0	0	0.949037	0.316346	0.547927	0.211325
P01767	Ig heavy chain V-III region BUT OS=Homo sapiens PE=1 SV=1 - [HV306_HUMAN]	0	0	0	0	0	0.978129	0	0	0.326043	0.564723	0.211325
P01768	Ig heavy chain V-III region CAM OS=Homo sapiens PE=1 SV=1 - [HV307_HUMAN]	0	0	0	0	0	0.978129	0	0	0.326043	0.564723	0.211325
P01775	Ig heavy chain V-III region LAY OS=Homo sapiens PE=1 SV=1 - [HV314_HUMAN]	0	0	0	0	0	0	0.967055	0	0.322352	0.55833	0.211325
P01848	T-cell receptor alpha chain C region OS=Homo sapiens GN=TRAC PE=1 SV=1 - [TCA_HUMAN]	0	0	0	0	0	0	0.967055	0	0.322352	0.55833	0.211325
P02008	Hemoglobin subunit zeta OS=Homo sapiens GN=HBZ PE=1 SV=2 - [HBAZ_HUMAN]	0	0	0	0	0	1.95626	0	0	0.652086	1.12945	0.211325
P02786	Transferrin receptor protein 1 OS=Homo sapiens GN=TFRC PE=1 SV=2 - [TFR1_HUMAN]	0	0	0	0	0	2.93439	3.86822	0	2.26754	2.01849	0.0955448
P04003	C4b-binding protein alpha chain OS=Homo sapiens GN=C4BPA PE=1 SV=2 - [C4BPA_HUMAN]	0	0	0	0	0	0	0	0.949037	0.316346	0.547927	0.211325
P04198	N-myc proto-oncogene protein OS=Homo sapiens GN=MYCN PE=1 SV=2 - [MYCN_HUMAN]	0	0	0	0	0	0.978129	0	0	0.326043	0.564723	0.211325
P04432	Ig kappa chain V-I region Daudi OS=Homo sapiens PE=4 SV=1 - [KV124_HUMAN]	0	0	0	0	0	0	0.967055	0	0.322352	0.55833	0.211325
P04844-2	Isoform 2 of Dolichyl-diphosphooligosaccharide--protein glycosyltransferase subunit 2 OS=Homo sapiens GN=RPN2 - [RPN2_HUMAN]	0	0	0	0	0	0	0	2.84711	0.949037	1.64378	0.211325
P04908	Histone H2A type 1-B/E OS=Homo sapiens GN=HIST1H2AB PE=1 SV=2 - [H2A1B_HUMAN]	0	0	0	0	0	75.3159	62.8586	72.1268	70.1004	6.47116	0.00141425
P05067-10	Isoform APP639 of Amyloid beta A4 protein OS=Homo sapiens GN=APP - [A4_HUMAN]	0	0	0	0	0	10.7594	0	0	3.58647	6.21195	0.211325
P05106	Integrin beta-3 OS=Homo sapiens GN=ITGB3 PE=1 SV=2 - [ITB3_HUMAN]	0	0	0	0	0	16.6282	15.4729	0	10.7004	9.28477	0.0920158
P05107	Integrin beta-2 OS=Homo sapiens GN=ITGB2 PE=1 SV=2 - [ITB2_HUMAN]	0	0	0	0	0	15.6501	14.5058	15.1846	15.1135	0.575421	0.000241421
P05121	Plasminogen activator inhibitor 1 OS=Homo sapiens GN=SERPINE1 PE=1 SV=1 - [PAI1_HUMAN]	0	0	0	0	0	1.95626	1.93411	2.84711	2.24583	0.520845	0.00873015
P05160	Coagulation factor XIII B chain OS=Homo sapiens GN=F13B PE=1 SV=3 - [F13B_HUMAN]	0	0	0	0	0	0.978129	0	0.949037	0.642389	0.556515	0.0917982
P05161	Ubiquitin-like protein ISG15 OS=Homo sapiens GN=ISG15 PE=1 SV=5 - [ISG15_HUMAN]	0	0	0	0	0	0	0.967055	0	0.322352	0.55833	0.211325
P05165-3	Isoform 3 of Propionyl-CoA carboxylase alpha chain, mitochondrial OS=Homo sapiens GN=PCCA - [PCCA_HUMAN]	0	0	0	0	0	13.6938	0	12.3375	8.67709	7.54512	0.0923047
P05186	Alkaline phosphatase, tissue-nonspecific isozyme OS=Homo sapiens GN=ALPL PE=1 SV=4 - [PPBT_HUMAN]	0	0	0	0	0	15.6501	15.4729	17.0827	16.0685	0.882714	0.000502205
P06213	Insulin receptor OS=Homo sapiens GN=INSR PE=1 SV=4 - [INSR_HUMAN]	0	0	0	0	0	8.80316	0	7.59229	5.46515	4.77153	0.0928605
P06241-3	Isoform 3 of Tyrosine-protein kinase Fyn OS=Homo sapiens GN=FYN - [FYN_HUMAN]	0	0	0	0	0	3.91252	3.86822	0	2.59358	2.24621	0.0917583
P06331	Ig heavy chain V-II region ARH-77 OS=Homo sapiens PE=4 SV=1 - [HV209_HUMAN]	0	0	0	0	0	0.978129	0	0	0.326043	0.564723	0.211325
P07196	Neurofilament light polypeptide OS=Homo sapiens GN=NEFL PE=1 SV=3 - [NFL_HUMAN]	0	0	0	0	0	0	10.6376	10.4394	7.02567	6.08522	0.0917698
P07225	Vitamin K-dependent protein S OS=Homo sapiens GN=PROS1 PE=1 SV=1 - [PROS_HUMAN]	0	0	0	0	0	0	2.90117	0	0.967055	1.67499	0.211325
P07902-2	Isoform 2 of Galactose-1-phosphate uridylyltransferase OS=Homo sapiens GN=GALT - [GALT_HUMAN]	0	0	0	0	0	0	0.967055	0	0.322352	0.55833	0.211325
P07911-3	Isoform 3 of Uromodulin OS=Homo sapiens GN=UMOD - [UROM_HUMAN]	0	0	0	0	0	84.1191	88.9691	79.7191	84.2691	4.62683	0.000501677
P08514	Integrin alpha-IIb OS=Homo sapiens GN=ITGA2B PE=1 SV=3 - [ITA2B_HUMAN]	0	0	0	0	0	25.4314	26.1105	27.5221	26.3546	1.06652	0.000272722
P08567	Pleckstrin OS=Homo sapiens GN=PLEK PE=1 SV=3 - [PLEK_HUMAN]	0	0	0	0	0	0.978129	0	0	0.326043	0.564723	0.211325
P08575-2	Isoform 2 of Receptor-type tyrosine-protein phosphatase C OS=Homo sapiens GN=PTPRC - [PTPRC_HUMAN]	0	0	0	0	0	9.78129	21.2752	14.2356	15.0974	5.79522	0.0228849
P08651-4	Isoform 3 of Nuclear factor 1 C-type OS=Homo sapiens GN=NFIC - [NFIC_HUMAN]	0	0	0	0	0	0.978129	0	0	0.326043	0.564723	0.211325
P08842	Steryl-sulfatase OS=Homo sapiens GN=STS PE=1 SV=2 - [STS_HUMAN]	0	0	0	0	0	0	0	0.949037	0.316346	0.547927	0.211325
P09104	Gamma-enolase OS=Homo sapiens GN=ENO2 PE=1 SV=3 - [ENOG_HUMAN]	0	0	0	0	0	51.8408	48.3528	46.5028	48.8988	2.71059	0.000511343
P09237	Matrilysin OS=Homo sapiens GN=MMP7 PE=1 SV=1 - [MMP7_HUMAN]	0	0	0	0	0	0.978129	0.967055	0.949037	0.96474	0.0146837	3.86052e-05
P09525	Annexin A4 OS=Homo sapiens GN=ANXA4 PE=1 SV=4 - [ANXA4_HUMAN]	0	0	0	0	0	0	213.719	0	71.2397	123.391	0.211325
P09622	Dihydrolipoyl dehydrogenase, mitochondrial OS=Homo sapiens GN=DLD PE=1 SV=2 - [DLDH_HUMAN]	0	0	0	0	0	0	25.1434	0	8.38115	14.5166	0.211325
P09917-2	Isoform 2 of Arachidonate 5-lipoxygenase OS=Homo sapiens GN=ALOX5 - [LOX5_HUMAN]	0	0	0	0	0	0	0	0.949037	0.316346	0.547927	0.211325
P09960-3	Isoform 3 of Leukotriene A-4 hydrolase OS=Homo sapiens GN=LTA4H - [LKHA4_HUMAN]	0	0	0	0	0	0	0	8.54133	2.84711	4.93134	0.211325
P0C2W1	F-box/SPRY domain-containing protein 1 OS=Homo sapiens GN=FBXO45 PE=1 SV=1 - [FBSP1_HUMAN]	0	0	0	0	0	1.95626	0	0.949037	0.968432	0.978273	0.114274
P0CW27	Coiled-coil domain-containing protein 166 OS=Homo sapiens GN=CCDC166 PE=4 SV=1 - [CC166_HUMAN]	0	0	0	0	0	0	1.93411	0.949037	0.961049	0.967111	0.113678
P0DJJ0	SLIT-ROBO Rho GTPase-activating protein 2C OS=Homo sapiens GN=SRGAP2C PE=1 SV=1 - [SRG2C_HUMAN]	0	0	0	0	0	0	0.967055	0	0.322352	0.55833	0.211325
P10124	Serglycin OS=Homo sapiens GN=SRGN PE=1 SV=3 - [SRGN_HUMAN]	0	0	0	0	0	0.978129	0.967055	0	0.648395	0.561554	0.0917583
P10620	Microsomal glutathione S-transferase 1 OS=Homo sapiens GN=MGST1 PE=1 SV=1 - [MGST1_HUMAN]	0	0	0	0	0	0	0	2.84711	0.949037	1.64378	0.211325
P10644	cAMP-dependent protein kinase type I-alpha regulatory subunit OS=Homo sapiens GN=PRKAR1A PE=1 SV=1 - [KAP0_HUMAN]	0	0	0	0	0	5.86877	0	0	1.95626	3.38834	0.211325
P10915	Hyaluronan and proteoglycan link protein 1 OS=Homo sapiens GN=HAPLN1 PE=2 SV=2 - [HPLN1_HUMAN]	0	0	0	0	0	7.82503	8.7035	7.59229	8.04027	0.586038	0.000883094
P11166	Solute carrier family 2, facilitated glucose transporter member 1 OS=Homo sapiens GN=SLC2A1 PE=1 SV=2 - [GTR1_HUMAN]	0	0	0	0	0	3.91252	4.83528	2.84711	3.86497	0.994936	0.0106916
P11388	DNA topoisomerase 2-alpha OS=Homo sapiens GN=TOP2A PE=1 SV=3 - [TOP2A_HUMAN]	0	0	0	0	0	0	0.967055	0.949037	0.638697	0.553201	0.0917698
P12081-3	Isoform 3 of Histidine--tRNA ligase, cytoplasmic OS=Homo sapiens GN=HARS - [SYHC_HUMAN]	0	0	0	0	0	12.7157	0	0	4.23856	7.3414	0.211325
P12110-2	Isoform 2C2A of Collagen alpha-2(VI) chain OS=Homo sapiens GN=COL6A2 - [CO6A2_HUMAN]	0	0	0	0	0	0	49.3198	53.1461	34.1553	29.6412	0.092036
P12273	Prolactin-inducible protein OS=Homo sapiens GN=PIP PE=1 SV=1 - [PIP_HUMAN]	0	0	0	0	0	0	0	0.949037	0.316346	0.547927	0.211325
P12757-3	Isoform SNON2 of Ski-like protein OS=Homo sapiens GN=SKIL - [SKIL_HUMAN]	0	0	0	0	0	0	0.967055	0.949037	0.638697	0.553201	0.0917698
P13224	Platelet glycoprotein Ib beta chain OS=Homo sapiens GN=GP1BB PE=1 SV=1 - [GP1BB_HUMAN]	0	0	0	0	0	1.95626	1.93411	0	1.29679	1.12311	0.0917583
P13535	Myosin-8 OS=Homo sapiens GN=MYH8 PE=1 SV=3 - [MYH8_HUMAN]	0	0	0	0	0	0	0	0.949037	0.316346	0.547927	0.211325
P13569-3	Isoform 3 of Cystic fibrosis transmembrane conductance regulator OS=Homo sapiens GN=CFTR - [CFTR_HUMAN]	0	0	0	0	0	0	0	0.949037	0.316346	0.547927	0.211325
P13686	Tartrate-resistant acid phosphatase type 5 OS=Homo sapiens GN=ACP5 PE=1 SV=3 - [PPA5_HUMAN]	0	0	0	0	0	1.95626	0	0	0.652086	1.12945	0.211325
P13688-3	Isoform 3 of Carcinoembryonic antigen-related cell adhesion molecule 1 OS=Homo sapiens GN=CEACAM1 - [CEAM1_HUMAN]	0	0	0	0	0	1.95626	0.967055	0	0.974438	0.97815	0.113292
P13726-2	Isoform 2 of Tissue factor OS=Homo sapiens GN=F3 - [TF_HUMAN]	0	0	0	0	0	0.978129	0	0	0.326043	0.564723	0.211325
P13761	HLA class II histocompatibility antigen, DRB1-7 beta chain OS=Homo sapiens GN=HLA-DRB1 PE=1 SV=1 - [2B17_HUMAN]	0	0	0	0	0	0	23.2093	0	7.73644	13.3999	0.211325
P13929-3	Isoform 3 of Beta-enolase OS=Homo sapiens GN=ENO3 - [ENOB_HUMAN]	0	0	0	0	0	17.6063	0	0	5.86877	10.165	0.211325
P14618-2	Isoform M1 of Pyruvate kinase isozymes M1/M2 OS=Homo sapiens GN=PKM - [KPYM_HUMAN]	0	0	0	0	0	94.8785	0	0	31.6262	54.7781	0.211325
P14866	Heterogeneous nuclear ribonucleoprotein L OS=Homo sapiens GN=HNRNPL PE=1 SV=2 - [HNRPL_HUMAN]	0	0	0	0	0	0	23.2093	0	7.73644	13.3999	0.211325
P15104	Glutamine synthetase OS=Homo sapiens GN=GLUL PE=1 SV=4 - [GLNA_HUMAN]	0	0	0	0	0	0	0	0.949037	0.316346	0.547927	0.211325
P15151-3	Isoform Gamma of Poliovirus receptor OS=Homo sapiens GN=PVR - [PVR_HUMAN]	0	0	0	0	0	0.978129	0	1.89807	0.958734	0.949185	0.111157
P15169	Carboxypeptidase N catalytic chain OS=Homo sapiens GN=CPN1 PE=1 SV=1 - [CBPN_HUMAN]	0	0	0	0	0	0	0.967055	0.949037	0.638697	0.553201	0.0917698
P15291-2	Isoform Short of Beta-1,4-galactosyltransferase 1 OS=Homo sapiens GN=B4GALT1 - [B4GT1_HUMAN]	0	0	0	0	0	1.95626	0	0	0.652086	1.12945	0.211325
P15529-15	Isoform K of Membrane cofactor protein OS=Homo sapiens GN=CD46 - [MCP_HUMAN]	0	0	0	0	0	0.978129	0	0.949037	0.642389	0.556515	0.0917982
P15735-2	Isoform 2 of Phosphorylase b kinase gamma catalytic chain, liver/testis isoform OS=Homo sapiens GN=PHKG2 - [PHKG2_HUMAN]	0	0	0	0	0	0.978129	0	1.89807	0.958734	0.949185	0.111157
P15907	Beta-galactoside alpha-2,6-sialyltransferase 1 OS=Homo sapiens GN=ST6GAL1 PE=1 SV=1 - [SIAT1_HUMAN]	0	0	0	0	0	0.978129	0	0.949037	0.642389	0.556515	0.0917982
P16035	Metalloproteinase inhibitor 2 OS=Homo sapiens GN=TIMP2 PE=1 SV=2 - [TIMP2_HUMAN]	0	0	0	0	0	0.978129	0.967055	0	0.648395	0.561554	0.0917583
P16104	Histone H2A.x OS=Homo sapiens GN=H2AFX PE=1 SV=2 - [H2AX_HUMAN]	0	0	0	0	0	61.6221	46.4187	51.248	53.0963	7.76843	0.00352996
P16112-2	Isoform 2 of Aggrecan core protein OS=Homo sapiens GN=ACAN - [PGCA_HUMAN]	0	0	0	0	0	15.6501	16.4399	17.0827	16.3909	0.717557	0.00031911
P16157-2	Isoform Er16 of Ankyrin-1 OS=Homo sapiens GN=ANK1 - [ANK1_HUMAN]	0	0	0	0	0	0	3.86822	0	1.28941	2.23332	0.211325
P16284-3	Isoform Delta13 of Platelet endothelial cell adhesion molecule OS=Homo sapiens GN=PECAM1 - [PECA1_HUMAN]	0	0	0	0	0	25.4314	26.1105	0	17.1806	14.8827	0.0917871
P16383-2	Isoform 2 of GC-rich sequence DNA-binding factor 2 OS=Homo sapiens GN=GCFC2 - [GCFC2_HUMAN]	0	0	0	0	0	0	0.967055	0	0.322352	0.55833	0.211325
P16455	Methylated-DNA--protein-cysteine methyltransferase OS=Homo sapiens GN=MGMT PE=1 SV=1 - [MGMT_HUMAN]	0	0	0	0	0	0.978129	0	0.949037	0.642389	0.556515	0.0917982
P16989-2	Isoform 2 of Y-box-binding protein 3 OS=Homo sapiens GN=YBX3 - [YBOX3_HUMAN]	0	0	0	0	0	10.7594	4.83528	2.84711	6.14727	4.11608	0.0612838
P17010-2	Isoform 2 of Zinc finger X-chromosomal protein OS=Homo sapiens GN=ZFX - [ZFX_HUMAN]	0	0	0	0	0	0.978129	0	0	0.326043	0.564723	0.211325
P17252	Protein kinase C alpha type OS=Homo sapiens GN=PRKCA PE=1 SV=4 - [KPCA_HUMAN]	0	0	0	0	0	0	1.93411	1.89807	1.27739	1.1064	0.0917698
P17480-2	Isoform UBF2 of Nucleolar transcription factor 1 OS=Homo sapiens GN=UBTF - [UBF1_HUMAN]	0	0	0	0	0	3.91252	3.86822	2.84711	3.54262	0.602733	0.00475575
P17655-2	Isoform 2 of Calpain-2 catalytic subunit OS=Homo sapiens GN=CAPN2 - [CAN2_HUMAN]	0	0	0	0	0	0	7.73644	0	2.57881	4.46664	0.211325
P17948-4	Isoform 4 of Vascular endothelial growth factor receptor 1 OS=Homo sapiens GN=FLT1 - [VGFR1_HUMAN]	0	0	0	0	0	1.95626	0	0	0.652086	1.12945	0.211325
P18583-2	Isoform A of Protein SON OS=Homo sapiens GN=SON - [SON_HUMAN]	0	0	0	0	0	14.6719	13.5388	9.49037	12.567	2.72404	0.00765158
P19525-2	Isoform 2 of Interferon-induced, double-stranded RNA-activated protein kinase OS=Homo sapiens GN=EIF2AK2 - [E2AK2_HUMAN]	0	0	0	0	0	1.95626	0	0	0.652086	1.12945	0.211325
P19784	Casein kinase II subunit alpha' OS=Homo sapiens GN=CSNK2A2 PE=1 SV=1 - [CSK22_HUMAN]	0	0	0	0	0	1.95626	4.83528	2.84711	3.21288	1.47395	0.0317705
P19838-3	Isoform 3 of Nuclear factor NF-kappa-B p105 subunit OS=Homo sapiens GN=NFKB1 - [NFKB1_HUMAN]	0	0	0	0	0	1.95626	0	0	0.652086	1.12945	0.211325
P20340-2	Isoform 2 of Ras-related protein Rab-6A OS=Homo sapiens GN=RAB6A - [RAB6A_HUMAN]	0	0	0	0	0	0	0	29.4201	9.80671	16.9857	0.211325
P20702	Integrin alpha-X OS=Homo sapiens GN=ITGAX PE=1 SV=3 - [ITAX_HUMAN]	0	0	0	0	0	0.978129	0.967055	0	0.648395	0.561554	0.0917583
P20711-3	Isoform 3 of Aromatic-L-amino-acid decarboxylase OS=Homo sapiens GN=DDC - [DDC_HUMAN]	0	0	0	0	0	0	0	9.49037	3.16346	5.47927	0.211325
P20851-2	Isoform 2 of C4b-binding protein beta chain OS=Homo sapiens GN=C4BPB - [C4BPB_HUMAN]	0	0	0	0	0	0.978129	1.93411	0.949037	1.28709	0.560523	0.0288964
P20908	Collagen alpha-1(V) chain OS=Homo sapiens GN=COL5A1 PE=1 SV=3 - [CO5A1_HUMAN]	0	0	0	0	0	1.95626	0.967055	1.89807	1.60713	0.555083	0.0187697
P21397-2	Isoform 2 of Amine oxidase [flavin-containing] A OS=Homo sapiens GN=MAOA - [AOFA_HUMAN]	0	0	0	0	0	0	0	6.64326	2.21442	3.83549	0.211325
P21589	5'-nucleotidase OS=Homo sapiens GN=NT5E PE=1 SV=1 - [5NTD_HUMAN]	0	0	0	0	0	0	0	6.64326	2.21442	3.83549	0.211325
P21675	Transcription initiation factor TFIID subunit 1 OS=Homo sapiens GN=TAF1 PE=1 SV=2 - [TAF1_HUMAN]	0	0	0	0	0	0.978129	0	0	0.326043	0.564723	0.211325
P21802-9	Isoform 9 of Fibroblast growth factor receptor 2 OS=Homo sapiens GN=FGFR2 - [FGFR2_HUMAN]	0	0	0	0	0	0	0	3.79615	1.26538	2.19171	0.211325
P21817-2	Isoform 2 of Ryanodine receptor 1 OS=Homo sapiens GN=RYR1 - [RYR1_HUMAN]	0	0	0	0	0	0	0	0.949037	0.316346	0.547927	0.211325
P22061	Protein-L-isoaspartate(D-aspartate) O-methyltransferase OS=Homo sapiens GN=PCMT1 PE=1 SV=4 - [PIMT_HUMAN]	0	0	0	0	0	0	0	7.59229	2.53076	4.38341	0.211325
P22307-4	Isoform 4 of Non-specific lipid-transfer protein OS=Homo sapiens GN=SCP2 - [NLTP_HUMAN]	0	0	0	0	0	0	10.6376	19.9298	10.1891	9.97245	0.109401
P22694-4	Isoform 4 of cAMP-dependent protein kinase catalytic subunit beta OS=Homo sapiens GN=PRKACB - [KAPCB_HUMAN]	0	0	0	0	0	2.93439	2.90117	0	1.94518	1.68466	0.0917583
P22735	Protein-glutamine gamma-glutamyltransferase K OS=Homo sapiens GN=TGM1 PE=1 SV=4 - [TGM1_HUMAN]	0	0	0	0	0	0.978129	0	0	0.326043	0.564723	0.211325
P23193-2	Isoform 2 of Transcription elongation factor A protein 1 OS=Homo sapiens GN=TCEA1 - [TCEA1_HUMAN]	0	0	0	0	0	0	1.93411	0	0.644704	1.11666	0.211325
P23381-2	Isoform 2 of Tryptophan--tRNA ligase, cytoplasmic OS=Homo sapiens GN=WARS - [SYWC_HUMAN]	0	0	0	0	0	12.7157	0	0	4.23856	7.3414	0.211325
P24468-3	Isoform 3 of COUP transcription factor 2 OS=Homo sapiens GN=NR2F2 - [COT2_HUMAN]	0	0	0	0	0	0	0	0.949037	0.316346	0.547927	0.211325
P24530-3	Isoform C of Endothelin B receptor OS=Homo sapiens GN=EDNRB - [EDNRB_HUMAN]	0	0	0	0	0	0.978129	0	0	0.326043	0.564723	0.211325
P24821	Tenascin OS=Homo sapiens GN=TNC PE=1 SV=3 - [TENA_HUMAN]	0	0	0	0	0	150.632	0	140.457	97.0298	84.1841	0.0920009
P24821-4	Isoform 4 of Tenascin OS=Homo sapiens GN=TNC - [TENA_HUMAN]	0	0	0	0	0	0	145.058	0	48.3528	83.7494	0.211325
P24928	DNA-directed RNA polymerase II subunit RPB1 OS=Homo sapiens GN=POLR2A PE=1 SV=2 - [RPB1_HUMAN]	0	0	0	0	0	0.978129	0	0	0.326043	0.564723	0.211325
P25092	Heat-stable enterotoxin receptor OS=Homo sapiens GN=GUCY2C PE=1 SV=2 - [GUC2C_HUMAN]	0	0	0	0	0	0	0.967055	0	0.322352	0.55833	0.211325
P25189-2	Isoform L-MPZ of Myelin protein P0 OS=Homo sapiens GN=MPZ - [MYP0_HUMAN]	0	0	0	0	0	0.978129	0	0	0.326043	0.564723	0.211325
P25685	DnaJ homolog subfamily B member 1 OS=Homo sapiens GN=DNAJB1 PE=1 SV=4 - [DNJB1_HUMAN]	0	0	0	0	0	4.89065	0	0	1.63022	2.82362	0.211325
P25815	Protein S100-P OS=Homo sapiens GN=S100P PE=1 SV=2 - [S100P_HUMAN]	0	0	0	0	0	0.978129	0	0	0.326043	0.564723	0.211325
P25940	Collagen alpha-3(V) chain OS=Homo sapiens GN=COL5A3 PE=1 SV=3 - [CO5A3_HUMAN]	0	0	0	0	0	0	0.967055	0.949037	0.638697	0.553201	0.0917698
P26440-2	Isoform 2 of Isovaleryl-CoA dehydrogenase, mitochondrial OS=Homo sapiens GN=IVD - [IVD_HUMAN]	0	0	0	0	0	6.8469	0	0	2.2823	3.95306	0.211325
P27105	Erythrocyte band 7 integral membrane protein OS=Homo sapiens GN=STOM PE=1 SV=3 - [STOM_HUMAN]	0	0	0	0	0	0	54.1551	55.9932	36.7161	31.8103	0.0918085
P27361	Mitogen-activated protein kinase 3 OS=Homo sapiens GN=MAPK3 PE=1 SV=4 - [MK03_HUMAN]	0	0	0	0	0	12.7157	12.5717	10.4394	11.9089	1.27468	0.00189858
P27816-6	Isoform 6 of Microtubule-associated protein 4 OS=Homo sapiens GN=MAP4 - [MAP4_HUMAN]	0	0	0	0	0	7.82503	5.80233	5.69422	6.44053	1.20023	0.00568951
P28074-3	Isoform 3 of Proteasome subunit beta type-5 OS=Homo sapiens GN=PSMB5 - [PSB5_HUMAN]	0	0	0	0	0	0	0	5.69422	1.89807	3.28756	0.211325
P28300	Protein-lysine 6-oxidase OS=Homo sapiens GN=LOX PE=1 SV=2 - [LYOX_HUMAN]	0	0	0	0	0	0.978129	0	0	0.326043	0.564723	0.211325
P29144	Tripeptidyl-peptidase 2 OS=Homo sapiens GN=TPP2 PE=1 SV=4 - [TPP2_HUMAN]	0	0	0	0	0	0	0.967055	0	0.322352	0.55833	0.211325
P29279	Connective tissue growth factor OS=Homo sapiens GN=CTGF PE=1 SV=2 - [CTGF_HUMAN]	0	0	0	0	0	0.978129	0.967055	0.949037	0.96474	0.0146837	3.86052e-05
P29350	Tyrosine-protein phosphatase non-receptor type 6 OS=Homo sapiens GN=PTPN6 PE=1 SV=1 - [PTN6_HUMAN]	0	0	0	0	0	3.91252	0	4.74518	2.8859	2.5337	0.0936268
P29508-2	Isoform 2 of Serpin B3 OS=Homo sapiens GN=SERPINB3 - [SPB3_HUMAN]	0	0	0	0	0	3.91252	2.90117	4.74518	3.85296	0.923451	0.0093074
P29590	Protein PML OS=Homo sapiens GN=PML PE=1 SV=3 - [PML_HUMAN]	0	0	0	0	0	41.0814	40.6163	34.1653	38.621	3.86575	0.0016615
P30453	HLA class I histocompatibility antigen, A-34 alpha chain OS=Homo sapiens GN=HLA-A PE=2 SV=1 - [1A34_HUMAN]	0	0	0	0	0	63.5784	0	0	21.1928	36.707	0.211325
P30483	HLA class I histocompatibility antigen, B-45 alpha chain OS=Homo sapiens GN=HLA-B PE=1 SV=1 - [1B45_HUMAN]	0	0	0	0	0	0	0	34.1653	11.3884	19.7254	0.211325
P30492	HLA class I histocompatibility antigen, B-54 alpha chain OS=Homo sapiens GN=HLA-B PE=2 SV=1 - [1B54_HUMAN]	0	0	0	0	0	50.8627	0	53.1461	34.6696	30.0464	0.0918501
P31513	Dimethylaniline monooxygenase [N-oxide-forming] 3 OS=Homo sapiens GN=FMO3 PE=1 SV=5 - [FMO3_HUMAN]	0	0	0	0	0	0	0	1.89807	0.632691	1.09585	0.211325
P31947-2	Isoform 2 of 14-3-3 protein sigma OS=Homo sapiens GN=SFN - [1433S_HUMAN]	0	0	0	0	0	50.8627	45.4516	47.4518	47.922	2.73603	0.00054239
P31994-2	Isoform IIB2 of Low affinity immunoglobulin gamma Fc region receptor II-b OS=Homo sapiens GN=FCGR2B - [FCG2B_HUMAN]	0	0	0	0	0	0.978129	0.967055	1.89807	1.28109	0.534356	0.0266959
P32456	Interferon-induced guanylate-binding protein 2 OS=Homo sapiens GN=GBP2 PE=1 SV=3 - [GBP2_HUMAN]	0	0	0	0	0	4.89065	0	2.84711	2.57925	2.4563	0.105285
P32970	CD70 antigen OS=Homo sapiens GN=CD70 PE=1 SV=2 - [CD70_HUMAN]	0	0	0	0	0	3.91252	0.967055	2.84711	2.57556	1.49139	0.0479758
P35052	Glypican-1 OS=Homo sapiens GN=GPC1 PE=1 SV=2 - [GPC1_HUMAN]	0	0	0	0	0	2.93439	0	3.79615	2.24351	1.99014	0.0950574
P35240-4	Isoform 4 of Merlin OS=Homo sapiens GN=NF2 - [MERL_HUMAN]	0	0	0	0	0	0	0	0.949037	0.316346	0.547927	0.211325
P35250-2	Isoform 2 of Replication factor C subunit 2 OS=Homo sapiens GN=RFC2 - [RFC2_HUMAN]	0	0	0	0	0	0	0	1.89807	0.632691	1.09585	0.211325
P35354	Prostaglandin G/H synthase 2 OS=Homo sapiens GN=PTGS2 PE=1 SV=2 - [PGH2_HUMAN]	0	0	0	0	0	0	0.967055	0	0.322352	0.55833	0.211325
P35498-3	Isoform 3 of Sodium channel protein type 1 subunit alpha OS=Homo sapiens GN=SCN1A - [SCN1A_HUMAN]	0	0	0	0	0	1.95626	0	0	0.652086	1.12945	0.211325
P35626	Beta-adrenergic receptor kinase 2 OS=Homo sapiens GN=ADRBK2 PE=2 SV=2 - [ARBK2_HUMAN]	0	0	0	0	0	0.978129	0	0	0.326043	0.564723	0.211325
P35680-3	Isoform C of Hepatocyte nuclear factor 1-beta OS=Homo sapiens GN=HNF1B - [HNF1B_HUMAN]	0	0	0	0	0	0.978129	0	0	0.326043	0.564723	0.211325
P35749-3	Isoform 3 of Myosin-11 OS=Homo sapiens GN=MYH11 - [MYH11_HUMAN]	0	0	0	0	0	0	418.735	0	139.578	241.757	0.211325
P35749-4	Isoform 4 of Myosin-11 OS=Homo sapiens GN=MYH11 - [MYH11_HUMAN]	0	0	0	0	0	433.311	422.603	396.697	417.537	18.8253	0.000338454
P35813-2	Isoform Alpha-2 of Protein phosphatase 1A OS=Homo sapiens GN=PPM1A - [PPM1A_HUMAN]	0	0	0	0	0	0	0	3.79615	1.26538	2.19171	0.211325
P35900	Keratin, type I cytoskeletal 20 OS=Homo sapiens GN=KRT20 PE=1 SV=1 - [K1C20_HUMAN]	0	0	0	0	0	0	12.5717	0	4.19057	7.25829	0.211325
P35916-3	Isoform 3 of Vascular endothelial growth factor receptor 3 OS=Homo sapiens GN=FLT4 - [VGFR3_HUMAN]	0	0	0	0	0	0.978129	0.967055	0	0.648395	0.561554	0.0917583
P36269	Gamma-glutamyltransferase 5 OS=Homo sapiens GN=GGT5 PE=1 SV=2 - [GGT5_HUMAN]	0	0	0	0	0	48.9065	48.3528	56.9422	51.4005	4.80726	0.00145149
P37173	TGF-beta receptor type-2 OS=Homo sapiens GN=TGFBR2 PE=1 SV=2 - [TGFR2_HUMAN]	0	0	0	0	0	0	0	0.949037	0.316346	0.547927	0.211325
P38159	RNA-binding motif protein, X chromosome OS=Homo sapiens GN=RBMX PE=1 SV=3 - [RBMX_HUMAN]	0	0	0	0	0	0	33.8469	29.4201	21.089	18.3973	0.0927474
P39748	Flap endonuclease 1 OS=Homo sapiens GN=FEN1 PE=1 SV=1 - [FEN1_HUMAN]	0	0	0	0	0	1.95626	0	0	0.652086	1.12945	0.211325
P39880-6	Isoform 7 of Homeobox protein cut-like 1 OS=Homo sapiens GN=CUX1 - [CUX1_HUMAN]	0	0	0	0	0	0	0	0.949037	0.316346	0.547927	0.211325
P40261	Nicotinamide N-methyltransferase OS=Homo sapiens GN=NNMT PE=1 SV=1 - [NNMT_HUMAN]	0	0	0	0	0	12.7157	9.67055	10.4394	10.9419	1.58353	0.00345459
P40429	60S ribosomal protein L13a OS=Homo sapiens GN=RPL13A PE=1 SV=2 - [RL13A_HUMAN]	0	0	0	0	0	2.93439	0	0	0.978129	1.69417	0.211325
P40938-2	Isoform 2 of Replication factor C subunit 3 OS=Homo sapiens GN=RFC3 - [RFC3_HUMAN]	0	0	0	0	0	0.978129	0	0.949037	0.642389	0.556515	0.0917982
P41227-2	Isoform 2 of N-alpha-acetyltransferase 10 OS=Homo sapiens GN=NAA10 - [NAA10_HUMAN]	0	0	0	0	0	0.978129	0.967055	1.89807	1.28109	0.534356	0.0266959
P42167	Lamina-associated polypeptide 2, isoforms beta/gamma OS=Homo sapiens GN=TMPO PE=1 SV=2 - [LAP2B_HUMAN]	0	0	0	0	0	38.147	38.6822	0	25.6097	22.1803	0.0917616
P42224	Signal transducer and activator of transcription 1-alpha/beta OS=Homo sapiens GN=STAT1 PE=1 SV=2 - [STAT1_HUMAN]	0	0	0	0	0	26.4095	0	0	8.80316	15.2475	0.211325
P42285	Superkiller viralicidic activity 2-like 2 OS=Homo sapiens GN=SKIV2L2 PE=1 SV=3 - [SK2L2_HUMAN]	0	0	0	0	0	0	0	1.89807	0.632691	1.09585	0.211325
P43007	Neutral amino acid transporter A OS=Homo sapiens GN=SLC1A4 PE=1 SV=1 - [SATT_HUMAN]	0	0	0	0	0	0	0.967055	0	0.322352	0.55833	0.211325
P43155-3	Isoform 3 of Carnitine O-acetyltransferase OS=Homo sapiens GN=CRAT - [CACP_HUMAN]	0	0	0	0	0	0	0.967055	0	0.322352	0.55833	0.211325
P43353	Aldehyde dehydrogenase family 3 member B1 OS=Homo sapiens GN=ALDH3B1 PE=2 SV=1 - [AL3B1_HUMAN]	0	0	0	0	0	3.91252	0	2.84711	2.25321	2.02274	0.09673
P43403	Tyrosine-protein kinase ZAP-70 OS=Homo sapiens GN=ZAP70 PE=1 SV=1 - [ZAP70_HUMAN]	0	0	0	0	0	0.978129	0	0	0.326043	0.564723	0.211325
P43490	Nicotinamide phosphoribosyltransferase OS=Homo sapiens GN=NAMPT PE=1 SV=1 - [NAMPT_HUMAN]	0	0	0	0	0	0	0	10.4394	3.4798	6.02719	0.211325
P46087-2	Isoform 2 of Putative ribosomal RNA methyltransferase NOP2 OS=Homo sapiens GN=NOP2 - [NOP2_HUMAN]	0	0	0	0	0	0	4.83528	0	1.61176	2.79165	0.211325
P46439	Glutathione S-transferase Mu 5 OS=Homo sapiens GN=GSTM5 PE=1 SV=3 - [GSTM5_HUMAN]	0	0	0	0	0	0	3.86822	6.64326	3.50383	3.33659	0.105275
P46531	Neurogenic locus notch homolog protein 1 OS=Homo sapiens GN=NOTCH1 PE=1 SV=4 - [NOTC1_HUMAN]	0	0	0	0	0	0.978129	0.967055	0	0.648395	0.561554	0.0917583
P46777	60S ribosomal protein L5 OS=Homo sapiens GN=RPL5 PE=1 SV=3 - [RL5_HUMAN]	0	0	0	0	0	7.82503	10.6376	8.54133	9.00132	1.46162	0.00433737
P48449-2	Isoform 2 of Lanosterol synthase OS=Homo sapiens GN=LSS - [ERG7_HUMAN]	0	0	0	0	0	0	1.93411	0	0.644704	1.11666	0.211325
P48449-3	Isoform 3 of Lanosterol synthase OS=Homo sapiens GN=LSS - [ERG7_HUMAN]	0	0	0	0	0	2.93439	0	0	0.978129	1.69417	0.211325
P48723	Heat shock 70 kDa protein 13 OS=Homo sapiens GN=HSPA13 PE=1 SV=1 - [HSP13_HUMAN]	0	0	0	0	0	0	2.90117	0	0.967055	1.67499	0.211325
P48745	Protein NOV homolog OS=Homo sapiens GN=NOV PE=1 SV=1 - [NOV_HUMAN]	0	0	0	0	0	1.95626	0.967055	0.949037	1.29078	0.576388	0.0302488
P49006	MARCKS-related protein OS=Homo sapiens GN=MARCKSL1 PE=1 SV=2 - [MRP_HUMAN]	0	0	0	0	0	0	0	0.949037	0.316346	0.547927	0.211325
P49069	Calcium signal-modulating cyclophilin ligand OS=Homo sapiens GN=CAMLG PE=1 SV=1 - [CAMLG_HUMAN]	0	0	0	0	0	0	0	1.89807	0.632691	1.09585	0.211325
P49137-2	Isoform 2 of MAP kinase-activated protein kinase 2 OS=Homo sapiens GN=MAPKAPK2 - [MAPK2_HUMAN]	0	0	0	0	0	0	0	0.949037	0.316346	0.547927	0.211325
P49326-3	Isoform 3 of Dimethylaniline monooxygenase [N-oxide-forming] 5 OS=Homo sapiens GN=FMO5 - [FMO5_HUMAN]	0	0	0	0	0	0	0	0.949037	0.316346	0.547927	0.211325
P49448	Glutamate dehydrogenase 2, mitochondrial OS=Homo sapiens GN=GLUD2 PE=1 SV=2 - [DHE4_HUMAN]	0	0	0	0	0	0	62.8586	63.5855	42.148	36.5031	0.0917585
P49454	Centromere protein F OS=Homo sapiens GN=CENPF PE=1 SV=2 - [CENPF_HUMAN]	0	0	0	0	0	0.978129	0	0	0.326043	0.564723	0.211325
P49746-2	Isoform 2 of Thrombospondin-3 OS=Homo sapiens GN=THBS3 - [TSP3_HUMAN]	0	0	0	0	0	0	0	2.84711	0.949037	1.64378	0.211325
P49755	Transmembrane emp24 domain-containing protein 10 OS=Homo sapiens GN=TMED10 PE=1 SV=2 - [TMEDA_HUMAN]	0	0	0	0	0	0	28.0446	28.4711	18.8386	16.3161	0.0917633
P49756-2	Isoform 2 of RNA-binding protein 25 OS=Homo sapiens GN=RBM25 - [RBM25_HUMAN]	0	0	0	0	0	0	2.90117	0	0.967055	1.67499	0.211325
P49790	Nuclear pore complex protein Nup153 OS=Homo sapiens GN=NUP153 PE=1 SV=2 - [NU153_HUMAN]	0	0	0	0	0	0.978129	0	0	0.326043	0.564723	0.211325
P49795	Regulator of G-protein signaling 19 OS=Homo sapiens GN=RGS19 PE=1 SV=1 - [RGS19_HUMAN]	0	0	0	0	0	0.978129	1.93411	0.949037	1.28709	0.560523	0.0288964
P49863	Granzyme K OS=Homo sapiens GN=GZMK PE=1 SV=1 - [GRAK_HUMAN]	0	0	0	0	0	1.95626	1.93411	0	1.29679	1.12311	0.0917583
P49903-2	Isoform 2 of Selenide, water dikinase 1 OS=Homo sapiens GN=SEPHS1 - [SPS1_HUMAN]	0	0	0	0	0	0	5.80233	0	1.93411	3.34998	0.211325
P49959	Double-strand break repair protein MRE11A OS=Homo sapiens GN=MRE11A PE=1 SV=3 - [MRE11_HUMAN]	0	0	0	0	0	0	7.73644	7.59229	5.10958	4.42561	0.0917698
P50053	Ketohexokinase OS=Homo sapiens GN=KHK PE=1 SV=1 - [KHK_HUMAN]	0	0	0	0	0	0	5.80233	0	1.93411	3.34998	0.211325
P50053-2	Isoform C of Ketohexokinase OS=Homo sapiens GN=KHK - [KHK_HUMAN]	0	0	0	0	0	15.6501	0	0	5.21669	9.03557	0.211325
P50395-2	Isoform 2 of Rab GDP dissociation inhibitor beta OS=Homo sapiens GN=GDI2 - [GDIB_HUMAN]	0	0	0	0	0	22.497	0	0	7.49899	12.9886	0.211325
P50479	PDZ and LIM domain protein 4 OS=Homo sapiens GN=PDLIM4 PE=1 SV=2 - [PDLI4_HUMAN]	0	0	0	0	0	7.82503	6.76939	6.64326	7.07923	0.648959	0.00139474
P50552	Vasodilator-stimulated phosphoprotein OS=Homo sapiens GN=VASP PE=1 SV=3 - [VASP_HUMAN]	0	0	0	0	0	8.80316	11.6047	8.54133	9.64972	1.69809	0.0050825
P50591	Tumor necrosis factor ligand superfamily member 10 OS=Homo sapiens GN=TNFSF10 PE=1 SV=1 - [TNF10_HUMAN]	0	0	0	0	0	0.978129	0	0	0.326043	0.564723	0.211325
P50750	Cyclin-dependent kinase 9 OS=Homo sapiens GN=CDK9 PE=1 SV=3 - [CDK9_HUMAN]	0	0	0	0	0	0	2.90117	0	0.967055	1.67499	0.211325
P51160	Cone cGMP-specific 3',5'-cyclic phosphodiesterase subunit alpha' OS=Homo sapiens GN=PDE6C PE=1 SV=2 - [PDE6C_HUMAN]	0	0	0	0	0	0	0	0.949037	0.316346	0.547927	0.211325
P51168-2	Isoform 2 of Amiloride-sensitive sodium channel subunit beta OS=Homo sapiens GN=SCNN1B - [SCNNB_HUMAN]	0	0	0	0	0	0	0.967055	0	0.322352	0.55833	0.211325
P51553-2	Isoform 2 of Isocitrate dehydrogenase [NAD] subunit gamma, mitochondrial OS=Homo sapiens GN=IDH3G - [IDH3G_HUMAN]	0	0	0	0	0	0	1.93411	0	0.644704	1.11666	0.211325
P51589	Cytochrome P450 2J2 OS=Homo sapiens GN=CYP2J2 PE=1 SV=2 - [CP2J2_HUMAN]	0	0	0	0	0	0.978129	0	0	0.326043	0.564723	0.211325
P51991-2	Isoform 2 of Heterogeneous nuclear ribonucleoprotein A3 OS=Homo sapiens GN=HNRNPA3 - [ROA3_HUMAN]	0	0	0	0	0	0	45.4516	0	15.1505	26.2415	0.211325
P52294	Importin subunit alpha-1 OS=Homo sapiens GN=KPNA1 PE=1 SV=3 - [IMA1_HUMAN]	0	0	0	0	0	0	0	1.89807	0.632691	1.09585	0.211325
P52735-3	Isoform 3 of Guanine nucleotide exchange factor VAV2 OS=Homo sapiens GN=VAV2 - [VAV2_HUMAN]	0	0	0	0	0	0.978129	0	0	0.326043	0.564723	0.211325
P53367	Arfaptin-1 OS=Homo sapiens GN=ARFIP1 PE=1 SV=2 - [ARFP1_HUMAN]	0	0	0	0	0	0	0	1.89807	0.632691	1.09585	0.211325
P53367-2	Isoform A of Arfaptin-1 OS=Homo sapiens GN=ARFIP1 - [ARFP1_HUMAN]	0	0	0	0	0	0	2.90117	0	0.967055	1.67499	0.211325
P53680-2	Isoform 2 of AP-2 complex subunit sigma OS=Homo sapiens GN=AP2S1 - [AP2S1_HUMAN]	0	0	0	0	0	0	0	0.949037	0.316346	0.547927	0.211325
P53794	Sodium/myo-inositol cotransporter OS=Homo sapiens GN=SLC5A3 PE=3 SV=2 - [SC5A3_HUMAN]	0	0	0	0	0	0.978129	0.967055	0	0.648395	0.561554	0.0917583
P54136	Arginine--tRNA ligase, cytoplasmic OS=Homo sapiens GN=RARS PE=1 SV=2 - [SYRC_HUMAN]	0	0	0	0	0	0	0	17.0827	5.69422	9.86268	0.211325
P54578-2	Isoform 2 of Ubiquitin carboxyl-terminal hydrolase 14 OS=Homo sapiens GN=USP14 - [UBP14_HUMAN]	0	0	0	0	0	15.6501	0	0	5.21669	9.03557	0.211325
P55081	Microfibrillar-associated protein 1 OS=Homo sapiens GN=MFAP1 PE=1 SV=2 - [MFAP1_HUMAN]	0	0	0	0	0	0.978129	1.93411	1.89807	1.60344	0.541833	0.0180096
P55196-1	Isoform 2 of Afadin OS=Homo sapiens GN=MLLT4 - [AFAD_HUMAN]	0	0	0	0	0	6.8469	0	1.89807	2.91499	3.53491	0.144699
P55199	RNA polymerase II elongation factor ELL OS=Homo sapiens GN=ELL PE=1 SV=1 - [ELL_HUMAN]	0	0	0	0	0	0.978129	0	0	0.326043	0.564723	0.211325
P55287	Cadherin-11 OS=Homo sapiens GN=CDH11 PE=1 SV=2 - [CAD11_HUMAN]	0	0	0	0	0	0	5.80233	5.69422	3.83218	3.31921	0.0917698
P55774	C-C motif chemokine 18 OS=Homo sapiens GN=CCL18 PE=1 SV=1 - [CCL18_HUMAN]	0	0	0	0	0	0	0	0.949037	0.316346	0.547927	0.211325
P56470	Galectin-4 OS=Homo sapiens GN=LGALS4 PE=1 SV=1 - [LEG4_HUMAN]	0	0	0	0	0	1.95626	1.93411	0	1.29679	1.12311	0.0917583
P56589	Peroxisomal biogenesis factor 3 OS=Homo sapiens GN=PEX3 PE=1 SV=1 - [PEX3_HUMAN]	0	0	0	0	0	0	0.967055	0	0.322352	0.55833	0.211325
P56975-4	Isoform 4 of Pro-neuregulin-3, membrane-bound isoform OS=Homo sapiens GN=NRG3 - [NRG3_HUMAN]	0	0	0	0	0	0.978129	0	0	0.326043	0.564723	0.211325
P58335-2	Isoform 2 of Anthrax toxin receptor 2 OS=Homo sapiens GN=ANTXR2 - [ANTR2_HUMAN]	0	0	0	0	0	0	0	0.949037	0.316346	0.547927	0.211325
P59827-2	Isoform 2 of BPI fold-containing family B member 4 OS=Homo sapiens GN=BPIFB4 - [BPIB4_HUMAN]	0	0	0	0	0	0.978129	0	0	0.326043	0.564723	0.211325
P60520	Gamma-aminobutyric acid receptor-associated protein-like 2 OS=Homo sapiens GN=GABARAPL2 PE=1 SV=1 - [GBRL2_HUMAN]	0	0	0	0	0	1.95626	0	0	0.652086	1.12945	0.211325
P60981-2	Isoform 2 of Destrin OS=Homo sapiens GN=DSTN - [DEST_HUMAN]	0	0	0	0	0	7.82503	0	0	2.60834	4.51778	0.211325
P61247	40S ribosomal protein S3a OS=Homo sapiens GN=RPS3A PE=1 SV=2 - [RS3A_HUMAN]	0	0	0	0	0	0	14.5058	0	4.83528	8.37494	0.211325
P61812	Transforming growth factor beta-2 OS=Homo sapiens GN=TGFB2 PE=1 SV=1 - [TGFB2_HUMAN]	0	0	0	0	0	0	0.967055	0	0.322352	0.55833	0.211325
P62070	Ras-related protein R-Ras2 OS=Homo sapiens GN=RRAS2 PE=1 SV=1 - [RRAS2_HUMAN]	0	0	0	0	0	5.86877	8.7035	0	4.85742	4.43901	0.0992635
P62081	40S ribosomal protein S7 OS=Homo sapiens GN=RPS7 PE=1 SV=1 - [RS7_HUMAN]	0	0	0	0	0	0	0	0.949037	0.316346	0.547927	0.211325
P62158	Calmodulin OS=Homo sapiens GN=CALM1 PE=1 SV=2 - [CALM_HUMAN]	0	0	0	0	0	0	0	74.9739	24.9913	43.2862	0.211325
P62314	Small nuclear ribonucleoprotein Sm D1 OS=Homo sapiens GN=SNRPD1 PE=1 SV=1 - [SMD1_HUMAN]	0	0	0	0	0	2.93439	0	0	0.978129	1.69417	0.211325
P62745	Rho-related GTP-binding protein RhoB OS=Homo sapiens GN=RHOB PE=1 SV=1 - [RHOB_HUMAN]	0	0	0	0	0	0	0.967055	0	0.322352	0.55833	0.211325
P68402-3	Isoform 3 of Platelet-activating factor acetylhydrolase IB subunit beta OS=Homo sapiens GN=PAFAH1B2 - [PA1B2_HUMAN]	0	0	0	0	0	1.95626	0	0	0.652086	1.12945	0.211325
P69849	Nodal modulator 3 OS=Homo sapiens GN=NOMO3 PE=2 SV=2 - [NOMO3_HUMAN]	0	0	0	0	0	0	0	6.64326	2.21442	3.83549	0.211325
P78324-4	Isoform 4 of Tyrosine-protein phosphatase non-receptor type substrate 1 OS=Homo sapiens GN=SIRPA - [SHPS1_HUMAN]	0	0	0	0	0	0	2.90117	0	0.967055	1.67499	0.211325
P78345	Ribonuclease P protein subunit p38 OS=Homo sapiens GN=RPP38 PE=1 SV=2 - [RPP38_HUMAN]	0	0	0	0	0	0.978129	0	0	0.326043	0.564723	0.211325
P78385	Keratin, type II cuticular Hb3 OS=Homo sapiens GN=KRT83 PE=1 SV=2 - [KRT83_HUMAN]	0	0	0	0	0	0	0	7.59229	2.53076	4.38341	0.211325
P78410-3	Isoform 3 of Butyrophilin subfamily 3 member A2 OS=Homo sapiens GN=BTN3A2 - [BT3A2_HUMAN]	0	0	0	0	0	1.95626	0	0	0.652086	1.12945	0.211325
P78536-2	Isoform B of Disintegrin and metalloproteinase domain-containing protein 17 OS=Homo sapiens GN=ADAM17 - [ADA17_HUMAN]	0	0	0	0	0	1.95626	0	0	0.652086	1.12945	0.211325
P78559	Microtubule-associated protein 1A OS=Homo sapiens GN=MAP1A PE=1 SV=6 - [MAP1A_HUMAN]	0	0	0	0	0	3.91252	0	6.64326	3.51859	3.3391	0.104763
P83876	Thioredoxin-like protein 4A OS=Homo sapiens GN=TXNL4A PE=1 SV=1 - [TXN4A_HUMAN]	0	0	0	0	0	0	0	1.89807	0.632691	1.09585	0.211325
P84101-4	Isoform 4 of Small EDRK-rich factor 2 OS=Homo sapiens GN=SERF2 - [SERF2_HUMAN]	0	0	0	0	0	0	0	0.949037	0.316346	0.547927	0.211325
P84157	Matrix-remodeling-associated protein 7 OS=Homo sapiens GN=MXRA7 PE=1 SV=1 - [MXRA7_HUMAN]	0	0	0	0	0	2.93439	0	0	0.978129	1.69417	0.211325
P84157-2	Isoform 2 of Matrix-remodeling-associated protein 7 OS=Homo sapiens GN=MXRA7 - [MXRA7_HUMAN]	0	0	0	0	0	5.86877	7.73644	2.84711	5.48411	2.46726	0.0306634
P98095	Fibulin-2 OS=Homo sapiens GN=FBLN2 PE=1 SV=2 - [FBLN2_HUMAN]	0	0	0	0	0	16.6282	22.2423	21.8278	20.2328	3.12852	0.00393788
P98175-2	Isoform 2 of RNA-binding protein 10 OS=Homo sapiens GN=RBM10 - [RBM10_HUMAN]	0	0	0	0	0	3.91252	0	0	1.30417	2.25889	0.211325
P98175-4	Isoform 4 of RNA-binding protein 10 OS=Homo sapiens GN=RBM10 - [RBM10_HUMAN]	0	0	0	0	0	0	3.86822	2.84711	2.23844	2.00465	0.096391
Q00535	Cyclin-dependent kinase 5 OS=Homo sapiens GN=CDK5 PE=1 SV=3 - [CDK5_HUMAN]	0	0	0	0	0	0	4.83528	0	1.61176	2.79165	0.211325
Q01085	Nucleolysin TIAR OS=Homo sapiens GN=TIAL1 PE=1 SV=1 - [TIAR_HUMAN]	0	0	0	0	0	0	4.83528	1.89807	2.24445	2.43618	0.125804
Q01469	Fatty acid-binding protein, epidermal OS=Homo sapiens GN=FABP5 PE=1 SV=3 - [FABP5_HUMAN]	0	0	0	0	0	0.978129	0	0.949037	0.642389	0.556515	0.0917982
Q01581	Hydroxymethylglutaryl-CoA synthase, cytoplasmic OS=Homo sapiens GN=HMGCS1 PE=1 SV=2 - [HMCS1_HUMAN]	0	0	0	0	0	1.95626	0	0	0.652086	1.12945	0.211325
Q02083-3	Isoform 3 of N-acylethanolamine-hydrolyzing acid amidase OS=Homo sapiens GN=NAAA - [NAAA_HUMAN]	0	0	0	0	0	0	0	4.74518	1.58173	2.73963	0.211325
Q02750	Dual specificity mitogen-activated protein kinase kinase 1 OS=Homo sapiens GN=MAP2K1 PE=1 SV=2 - [MP2K1_HUMAN]	0	0	0	0	0	0	2.90117	0	0.967055	1.67499	0.211325
Q02978-2	Isoform 2 of Mitochondrial 2-oxoglutarate/malate carrier protein OS=Homo sapiens GN=SLC25A11 - [M2OM_HUMAN]	0	0	0	0	0	1.95626	3.86822	3.79615	3.20688	1.08367	0.0180096
Q03701	CCAAT/enhancer-binding protein zeta OS=Homo sapiens GN=CEBPZ PE=1 SV=3 - [CEBPZ_HUMAN]	0	0	0	0	0	0	0.967055	0	0.322352	0.55833	0.211325
Q04609-9	Isoform PSMA-9 of Glutamate carboxypeptidase 2 OS=Homo sapiens GN=FOLH1 - [FOLH1_HUMAN]	0	0	0	0	0	0	4.83528	5.69422	3.50983	3.06979	0.0931033
Q06033-2	Isoform 2 of Inter-alpha-trypsin inhibitor heavy chain H3 OS=Homo sapiens GN=ITIH3 - [ITIH3_HUMAN]	0	0	0	0	0	0	2.90117	5.69422	2.86513	2.84728	0.111736
Q07283	Trichohyalin OS=Homo sapiens GN=TCHH PE=1 SV=2 - [TRHY_HUMAN]	0	0	0	0	0	0.978129	0	0	0.326043	0.564723	0.211325
Q08170	Serine/arginine-rich splicing factor 4 OS=Homo sapiens GN=SRSF4 PE=1 SV=2 - [SRSF4_HUMAN]	0	0	0	0	0	8.80316	7.73644	6.64326	7.72762	1.07998	0.00322383
Q08345-2	Isoform 2 of Epithelial discoidin domain-containing receptor 1 OS=Homo sapiens GN=DDR1 - [DDR1_HUMAN]	0	0	0	0	0	0	0	0.949037	0.316346	0.547927	0.211325
Q08378	Golgin subfamily A member 3 OS=Homo sapiens GN=GOLGA3 PE=1 SV=2 - [GOGA3_HUMAN]	0	0	0	0	0	0	0	18.0317	6.01057	10.4106	0.211325
Q08426-2	Isoform 2 of Peroxisomal bifunctional enzyme OS=Homo sapiens GN=EHHADH - [ECHP_HUMAN]	0	0	0	0	0	7.82503	8.7035	4.74518	7.09124	2.07868	0.0137339
Q08828	Adenylate cyclase type 1 OS=Homo sapiens GN=ADCY1 PE=1 SV=2 - [ADCY1_HUMAN]	0	0	0	0	0	0	0	0.949037	0.316346	0.547927	0.211325
Q08881	Tyrosine-protein kinase ITK/TSK OS=Homo sapiens GN=ITK PE=1 SV=1 - [ITK_HUMAN]	0	0	0	0	0	0	0.967055	0	0.322352	0.55833	0.211325
Q09MP3	RAD51-associated protein 2 OS=Homo sapiens GN=RAD51AP2 PE=1 SV=1 - [R51A2_HUMAN]	0	0	0	0	0	0	0	0.949037	0.316346	0.547927	0.211325
Q0P663	CCDC25 protein OS=Homo sapiens GN=CCDC25 PE=2 SV=1 - [Q0P663_HUMAN]	0	0	0	0	0	0	0	0.949037	0.316346	0.547927	0.211325
Q0P6D6	Coiled-coil domain-containing protein 15 OS=Homo sapiens GN=CCDC15 PE=2 SV=2 - [CCD15_HUMAN]	0	0	0	0	0	0	0	0.949037	0.316346	0.547927	0.211325
Q0VD83-3	Isoform 3 of Apolipoprotein B receptor OS=Homo sapiens GN=APOBR - [APOBR_HUMAN]	0	0	0	0	0	0	1.93411	0.949037	0.961049	0.967111	0.113678
Q0VFZ6	Coiled-coil domain-containing protein 173 OS=Homo sapiens GN=CCDC173 PE=2 SV=2 - [CC173_HUMAN]	0	0	0	0	0	0	0	1.89807	0.632691	1.09585	0.211325
Q0ZGT2-2	Isoform 2 of Nexilin OS=Homo sapiens GN=NEXN - [NEXN_HUMAN]	0	0	0	0	0	0	0	14.2356	4.74518	8.2189	0.211325
Q12774-2	Isoform 2 of Rho guanine nucleotide exchange factor 5 OS=Homo sapiens GN=ARHGEF5 - [ARHG5_HUMAN]	0	0	0	0	0	0.978129	0	0	0.326043	0.564723	0.211325
Q12913-2	Isoform 2 of Receptor-type tyrosine-protein phosphatase eta OS=Homo sapiens GN=PTPRJ - [PTPRJ_HUMAN]	0	0	0	0	0	2.93439	0	4.74518	2.55986	2.39466	0.102648
Q12955	Ankyrin-3 OS=Homo sapiens GN=ANK3 PE=1 SV=3 - [ANK3_HUMAN]	0	0	0	0	0	0	27.0775	0	9.02585	15.6332	0.211325
Q12981-2	Isoform 2 of Vesicle transport protein SEC20 OS=Homo sapiens GN=BNIP1 - [SEC20_HUMAN]	0	0	0	0	0	0	0	0.949037	0.316346	0.547927	0.211325
Q13002-4	Isoform 4 of Glutamate receptor ionotropic, kainate 2 OS=Homo sapiens GN=GRIK2 - [GRIK2_HUMAN]	0	0	0	0	0	0	0.967055	0	0.322352	0.55833	0.211325
Q13033-2	Isoform Alpha of Striatin-3 OS=Homo sapiens GN=STRN3 - [STRN3_HUMAN]	0	0	0	0	0	0	1.93411	0	0.644704	1.11666	0.211325
Q13043	Serine/threonine-protein kinase 4 OS=Homo sapiens GN=STK4 PE=1 SV=2 - [STK4_HUMAN]	0	0	0	0	0	1.95626	0	0	0.652086	1.12945	0.211325
Q13136-2	Isoform 2 of Liprin-alpha-1 OS=Homo sapiens GN=PPFIA1 - [LIPA1_HUMAN]	0	0	0	0	0	1.95626	0	0	0.652086	1.12945	0.211325
Q13177	Serine/threonine-protein kinase PAK 2 OS=Homo sapiens GN=PAK2 PE=1 SV=3 - [PAK2_HUMAN]	0	0	0	0	0	2.93439	4.83528	3.79615	3.85527	0.951823	0.00985952
Q13191-3	Isoform Truncated 2 of E3 ubiquitin-protein ligase CBL-B OS=Homo sapiens GN=CBLB - [CBLB_HUMAN]	0	0	0	0	0	0	0.967055	0	0.322352	0.55833	0.211325
Q13201-2	Isoform 2 of Multimerin-1 OS=Homo sapiens GN=MMRN1 - [MMRN1_HUMAN]	0	0	0	0	0	0.978129	0	0	0.326043	0.564723	0.211325
Q13233	Mitogen-activated protein kinase kinase kinase 1 OS=Homo sapiens GN=MAP3K1 PE=1 SV=4 - [M3K1_HUMAN]	0	0	0	0	0	0	0.967055	0	0.322352	0.55833	0.211325
Q13326	Gamma-sarcoglycan OS=Homo sapiens GN=SGCG PE=1 SV=4 - [SGCG_HUMAN]	0	0	0	0	0	0	0	0.949037	0.316346	0.547927	0.211325
Q13367-2	Isoform 2 of AP-3 complex subunit beta-2 OS=Homo sapiens GN=AP3B2 - [AP3B2_HUMAN]	0	0	0	0	0	0	0	0.949037	0.316346	0.547927	0.211325
Q13438-4	Isoform 4 of Protein OS-9 OS=Homo sapiens GN=OS9 - [OS9_HUMAN]	0	0	0	0	0	4.89065	0	2.84711	2.57925	2.4563	0.105285
Q13444-10	Isoform 10 of Disintegrin and metalloproteinase domain-containing protein 15 OS=Homo sapiens GN=ADAM15 - [ADA15_HUMAN]	0	0	0	0	0	0	0.967055	0	0.322352	0.55833	0.211325
Q13449	Limbic system-associated membrane protein OS=Homo sapiens GN=LSAMP PE=1 SV=2 - [LSAMP_HUMAN]	0	0	0	0	0	0	0.967055	0	0.322352	0.55833	0.211325
Q13451	Peptidyl-prolyl cis-trans isomerase FKBP5 OS=Homo sapiens GN=FKBP5 PE=1 SV=2 - [FKBP5_HUMAN]	0	0	0	0	0	0	0	1.89807	0.632691	1.09585	0.211325
Q13547	Histone deacetylase 1 OS=Homo sapiens GN=HDAC1 PE=1 SV=1 - [HDAC1_HUMAN]	0	0	0	0	0	0	2.90117	5.69422	2.86513	2.84728	0.111736
Q13591	Semaphorin-5A OS=Homo sapiens GN=SEMA5A PE=1 SV=3 - [SEM5A_HUMAN]	0	0	0	0	0	0.978129	0	0	0.326043	0.564723	0.211325
Q13595-2	Isoform Short of Transformer-2 protein homolog alpha OS=Homo sapiens GN=TRA2A - [TRA2A_HUMAN]	0	0	0	0	0	2.93439	2.90117	4.74518	3.52691	1.05518	0.0142821
Q13601-2	Isoform 2 of KRR1 small subunit processome component homolog OS=Homo sapiens GN=KRR1 - [KRR1_HUMAN]	0	0	0	0	0	0.978129	1.93411	1.89807	1.60344	0.541833	0.0180096
Q13618-2	Isoform 2 of Cullin-3 OS=Homo sapiens GN=CUL3 - [CUL3_HUMAN]	0	0	0	0	0	1.95626	1.93411	1.89807	1.92948	0.0293673	3.86052e-05
Q13636	Ras-related protein Rab-31 OS=Homo sapiens GN=RAB31 PE=1 SV=1 - [RAB31_HUMAN]	0	0	0	0	0	5.86877	5.80233	10.4394	7.37017	2.65824	0.0203657
Q13637	Ras-related protein Rab-32 OS=Homo sapiens GN=RAB32 PE=1 SV=3 - [RAB32_HUMAN]	0	0	0	0	0	0	1.93411	0	0.644704	1.11666	0.211325
Q13642-1	Isoform 1 of Four and a half LIM domains protein 1 OS=Homo sapiens GN=FHL1 - [FHL1_HUMAN]	0	0	0	0	0	0	11.6047	11.3884	7.66437	6.63842	0.0917698
Q13797	Integrin alpha-9 OS=Homo sapiens GN=ITGA9 PE=1 SV=2 - [ITA9_HUMAN]	0	0	0	0	0	0	0	2.84711	0.949037	1.64378	0.211325
Q13822	Ectonucleotide pyrophosphatase/phosphodiesterase family member 2 OS=Homo sapiens GN=ENPP2 PE=1 SV=3 - [ENPP2_HUMAN]	0	0	0	0	0	0	1.93411	2.84711	1.59374	1.45375	0.0989973
Q14088	Ras-related protein Rab-33A OS=Homo sapiens GN=RAB33A PE=1 SV=2 - [RB33A_HUMAN]	0	0	0	0	0	0	0.967055	0	0.322352	0.55833	0.211325
Q14108-2	Isoform 2 of Lysosome membrane protein 2 OS=Homo sapiens GN=SCARB2 - [SCRB2_HUMAN]	0	0	0	0	0	0	10.6376	0	3.54587	6.14163	0.211325
Q14141-2	Isoform I of Septin-6 OS=Homo sapiens GN=SEPT6 - [SEPT6_HUMAN]	0	0	0	0	0	0	0	18.0317	6.01057	10.4106	0.211325
Q14195-2	Isoform LCRMP-4 of Dihydropyrimidinase-related protein 3 OS=Homo sapiens GN=DPYSL3 - [DPYL3_HUMAN]	0	0	0	0	0	37.1689	38.6822	35.1144	36.9885	1.79076	0.000390193
Q14244-5	Isoform 5 of Ensconsin OS=Homo sapiens GN=MAP7 - [MAP7_HUMAN]	0	0	0	0	0	0	0.967055	0	0.322352	0.55833	0.211325
Q14247	Src substrate cortactin OS=Homo sapiens GN=CTTN PE=1 SV=2 - [SRC8_HUMAN]	0	0	0	0	0	18.5845	25.1434	20.8788	21.5356	3.32845	0.00393433
Q14249	Endonuclease G, mitochondrial OS=Homo sapiens GN=ENDOG PE=1 SV=4 - [NUCG_HUMAN]	0	0	0	0	0	0.978129	0.967055	0	0.648395	0.561554	0.0917583
Q14318	Peptidyl-prolyl cis-trans isomerase FKBP8 OS=Homo sapiens GN=FKBP8 PE=1 SV=2 - [FKBP8_HUMAN]	0	0	0	0	0	0	2.90117	2.84711	1.91609	1.6596	0.0917698
Q14432	cGMP-inhibited 3',5'-cyclic phosphodiesterase A OS=Homo sapiens GN=PDE3A PE=1 SV=3 - [PDE3A_HUMAN]	0	0	0	0	0	0.978129	0.967055	1.89807	1.28109	0.534356	0.0266959
Q14512	Fibroblast growth factor-binding protein 1 OS=Homo sapiens GN=FGFBP1 PE=1 SV=1 - [FGFP1_HUMAN]	0	0	0	0	0	0	0.967055	0	0.322352	0.55833	0.211325
Q14515	SPARC-like protein 1 OS=Homo sapiens GN=SPARCL1 PE=1 SV=2 - [SPRL1_HUMAN]	0	0	0	0	0	0	0	3.79615	1.26538	2.19171	0.211325
Q14643-4	Isoform 4 of Inositol 1,4,5-trisphosphate receptor type 1 OS=Homo sapiens GN=ITPR1 - [ITPR1_HUMAN]	0	0	0	0	0	1.95626	0	0	0.652086	1.12945	0.211325
Q14695	Uncharacterized protein KIAA0087 OS=Homo sapiens GN=KIAA0087 PE=2 SV=1 - [K0087_HUMAN]	0	0	0	0	0	0	0	0.949037	0.316346	0.547927	0.211325
Q14761	Protein tyrosine phosphatase receptor type C-associated protein OS=Homo sapiens GN=PTPRCAP PE=1 SV=1 - [PTCA_HUMAN]	0	0	0	0	0	0.978129	0	0	0.326043	0.564723	0.211325
Q14766-3	Isoform 3 of Latent-transforming growth factor beta-binding protein 1 OS=Homo sapiens GN=LTBP1 - [LTBP1_HUMAN]	0	0	0	0	0	4.89065	4.83528	7.59229	5.77274	1.57602	0.011978
Q14839-2	Isoform 2 of Chromodomain-helicase-DNA-binding protein 4 OS=Homo sapiens GN=CHD4 - [CHD4_HUMAN]	0	0	0	0	0	0.978129	0	0	0.326043	0.564723	0.211325
Q14863	POU domain, class 6, transcription factor 1 OS=Homo sapiens GN=POU6F1 PE=1 SV=1 - [PO6F1_HUMAN]	0	0	0	0	0	0.978129	0	0	0.326043	0.564723	0.211325
Q14997-4	Isoform 4 of Proteasome activator complex subunit 4 OS=Homo sapiens GN=PSME4 - [PSME4_HUMAN]	0	0	0	0	0	0	0.967055	0	0.322352	0.55833	0.211325
Q15019	Septin-2 OS=Homo sapiens GN=SEPT2 PE=1 SV=1 - [SEPT2_HUMAN]	0	0	0	0	0	29.3439	0	34.1653	21.1697	18.4913	0.0929231
Q15061	WD repeat-containing protein 43 OS=Homo sapiens GN=WDR43 PE=1 SV=3 - [WDR43_HUMAN]	0	0	0	0	0	0	0	0.949037	0.316346	0.547927	0.211325
Q15063-3	Isoform 3 of Periostin OS=Homo sapiens GN=POSTN - [POSTN_HUMAN]	0	0	0	0	0	103.682	107.343	97.7508	102.925	4.84072	0.000368251
Q15118	[Pyruvate dehydrogenase [lipoamide]] kinase isozyme 1, mitochondrial OS=Homo sapiens GN=PDK1 PE=1 SV=1 - [PDK1_HUMAN]	0	0	0	0	0	0	0	7.59229	2.53076	4.38341	0.211325
Q15149	Plectin OS=Homo sapiens GN=PLEC PE=1 SV=3 - [PLEC_HUMAN]	0	0	0	0	0	0	0	444.149	148.05	256.43	0.211325
Q15397	Pumilio domain-containing protein KIAA0020 OS=Homo sapiens GN=KIAA0020 PE=1 SV=3 - [K0020_HUMAN]	0	0	0	0	0	0	0.967055	0.949037	0.638697	0.553201	0.0917698
Q15413-3	Isoform 3 of Ryanodine receptor 3 OS=Homo sapiens GN=RYR3 - [RYR3_HUMAN]	0	0	0	0	0	0	0.967055	0	0.322352	0.55833	0.211325
Q15424-2	Isoform 2 of Scaffold attachment factor B1 OS=Homo sapiens GN=SAFB - [SAFB1_HUMAN]	0	0	0	0	0	16.6282	10.6376	9.49037	12.2521	3.83301	0.0155549
Q15800-2	Isoform 2 of Methylsterol monooxygenase 1 OS=Homo sapiens GN=MSMO1 - [MSMO1_HUMAN]	0	0	0	0	0	0.978129	0.967055	0	0.648395	0.561554	0.0917583
Q15911-2	Isoform B of Zinc finger homeobox protein 3 OS=Homo sapiens GN=ZFHX3 - [ZFHX3_HUMAN]	0	0	0	0	0	0	0.967055	0	0.322352	0.55833	0.211325
Q16082	Heat shock protein beta-2 OS=Homo sapiens GN=HSPB2 PE=1 SV=2 - [HSPB2_HUMAN]	0	0	0	0	0	0	0.967055	0.949037	0.638697	0.553201	0.0917698
Q16527	Cysteine and glycine-rich protein 2 OS=Homo sapiens GN=CSRP2 PE=1 SV=3 - [CSRP2_HUMAN]	0	0	0	0	0	14.6719	15.4729	13.2865	14.4771	1.10613	0.000970133
Q16555	Dihydropyrimidinase-related protein 2 OS=Homo sapiens GN=DPYSL2 PE=1 SV=1 - [DPYL2_HUMAN]	0	0	0	0	0	0	52.221	47.4518	33.2243	28.8717	0.0922182
Q16611	Bcl-2 homologous antagonist/killer OS=Homo sapiens GN=BAK1 PE=1 SV=1 - [BAK_HUMAN]	0	0	0	0	0	0	0.967055	0	0.322352	0.55833	0.211325
Q16625-4	Isoform 4 of Occludin OS=Homo sapiens GN=OCLN - [OCLN_HUMAN]	0	0	0	0	0	0	0	1.89807	0.632691	1.09585	0.211325
Q16647	Prostacyclin synthase OS=Homo sapiens GN=PTGIS PE=1 SV=1 - [PTGIS_HUMAN]	0	0	0	0	0	4.89065	2.90117	5.69422	4.49534	1.43788	0.0162261
Q16654	[Pyruvate dehydrogenase [lipoamide]] kinase isozyme 4, mitochondrial OS=Homo sapiens GN=PDK4 PE=1 SV=1 - [PDK4_HUMAN]	0	0	0	0	0	0	0	0.949037	0.316346	0.547927	0.211325
Q16666-3	Isoform 3 of Gamma-interferon-inducible protein 16 OS=Homo sapiens GN=IFI16 - [IF16_HUMAN]	0	0	0	0	0	4.89065	4.83528	0	3.24197	2.80777	0.0917583
Q16706	Alpha-mannosidase 2 OS=Homo sapiens GN=MAN2A1 PE=1 SV=2 - [MA2A1_HUMAN]	0	0	0	0	0	0	0	0.949037	0.316346	0.547927	0.211325
Q16787-3	Isoform 3 of Laminin subunit alpha-3 OS=Homo sapiens GN=LAMA3 - [LAMA3_HUMAN]	0	0	0	0	0	0	1.93411	1.89807	1.27739	1.1064	0.0917698
Q16790	Carbonic anhydrase 9 OS=Homo sapiens GN=CA9 PE=1 SV=2 - [CAH9_HUMAN]	0	0	0	0	0	6.8469	8.7035	9.49037	8.34692	1.35733	0.00434979
Q16850-2	Isoform 2 of Lanosterol 14-alpha demethylase OS=Homo sapiens GN=CYP51A1 - [CP51A_HUMAN]	0	0	0	0	0	1.95626	0	0	0.652086	1.12945	0.211325
Q16851-2	Isoform 2 of UTP--glucose-1-phosphate uridylyltransferase OS=Homo sapiens GN=UGP2 - [UGPA_HUMAN]	0	0	0	0	0	9.78129	7.73644	5.69422	7.73732	2.04354	0.0112357
Q17RP2	Tigger transposable element-derived protein 6 OS=Homo sapiens GN=TIGD6 PE=2 SV=2 - [TIGD6_HUMAN]	0	0	0	0	0	0	0.967055	0	0.322352	0.55833	0.211325
Q2NL82	Pre-rRNA-processing protein TSR1 homolog OS=Homo sapiens GN=TSR1 PE=1 SV=1 - [TSR1_HUMAN]	0	0	0	0	0	0	2.90117	0	0.967055	1.67499	0.211325
Q2UY09	Collagen alpha-1(XXVIII) chain OS=Homo sapiens GN=COL28A1 PE=2 SV=2 - [COSA1_HUMAN]	0	0	0	0	0	0.978129	0	0	0.326043	0.564723	0.211325
Q3SY69	Mitochondrial 10-formyltetrahydrofolate dehydrogenase OS=Homo sapiens GN=ALDH1L2 PE=1 SV=2 - [AL1L2_HUMAN]	0	0	0	0	0	0	0	1.89807	0.632691	1.09585	0.211325
Q3T906	N-acetylglucosamine-1-phosphotransferase subunits alpha/beta OS=Homo sapiens GN=GNPTAB PE=1 SV=1 - [GNPTA_HUMAN]	0	0	0	0	0	0	0.967055	1.89807	0.955043	0.949094	0.111736
Q3ZCM7	Tubulin beta-8 chain OS=Homo sapiens GN=TUBB8 PE=1 SV=2 - [TBB8_HUMAN]	0	0	0	0	0	118.354	0	0	39.4512	68.3315	0.211325
Q496A3-2	Isoform 2 of Spermatogenesis-associated serine-rich protein 1 OS=Homo sapiens GN=SPATS1 - [SPAS1_HUMAN]	0	0	0	0	0	0	0.967055	0	0.322352	0.55833	0.211325
Q49AF1	F-box only protein 3 OS=Homo sapiens GN=FBXO3 PE=2 SV=1 - [Q49AF1_HUMAN]	0	0	0	0	0	0.978129	0	0	0.326043	0.564723	0.211325
Q4J6B6	Neutral and basic amino acid transport protein rBAT OS=Homo sapiens GN=SLC3A1 PE=2 SV=1 - [Q4J6B6_HUMAN]	0	0	0	0	0	0	2.90117	1.89807	1.59975	1.47341	0.100387
Q4J6B8	Neutral and basic amino acid transport protein rBAT OS=Homo sapiens GN=SLC3A1 PE=2 SV=1 - [Q4J6B8_HUMAN]	0	0	0	0	0	0.978129	0	0	0.326043	0.564723	0.211325
Q4L180-6	Isoform 6 of Filamin A-interacting protein 1-like OS=Homo sapiens GN=FILIP1L - [FIL1L_HUMAN]	0	0	0	0	0	0	0.967055	0.949037	0.638697	0.553201	0.0917698
Q4LDE5-2	Isoform 2 of Sushi, von Willebrand factor type A, EGF and pentraxin domain-containing protein 1 OS=Homo sapiens GN=SVEP1 - [SVEP1_HUMAN]	0	0	0	0	0	0	0.967055	0	0.322352	0.55833	0.211325
Q4LE39-4	Isoform 4 of AT-rich interactive domain-containing protein 4B OS=Homo sapiens GN=ARID4B - [ARI4B_HUMAN]	0	0	0	0	0	0.978129	0	0	0.326043	0.564723	0.211325
Q4VXW4	Opioid growth factor receptor OS=Homo sapiens GN=OGFR PE=2 SV=1 - [Q4VXW4_HUMAN]	0	0	0	0	0	0	0	0.949037	0.316346	0.547927	0.211325
Q52LJ0-2	Isoform 2 of Protein FAM98B OS=Homo sapiens GN=FAM98B - [FA98B_HUMAN]	0	0	0	0	0	0	5.80233	7.59229	4.46488	3.96892	0.0953488
Q52LW3-2	Isoform 2 of Rho GTPase-activating protein 29 OS=Homo sapiens GN=ARHGAP29 - [RHG29_HUMAN]	0	0	0	0	0	0.978129	0.967055	0.949037	0.96474	0.0146837	3.86052e-05
Q53EP0-2	Isoform 2 of Fibronectin type III domain-containing protein 3B OS=Homo sapiens GN=FNDC3B - [FND3B_HUMAN]	0	0	0	0	0	0	0	0.949037	0.316346	0.547927	0.211325
Q53F19	Uncharacterized protein C17orf85 OS=Homo sapiens GN=C17orf85 PE=1 SV=2 - [CQ085_HUMAN]	0	0	0	0	0	0	0	1.89807	0.632691	1.09585	0.211325
Q53GG5-2	Isoform 2 of PDZ and LIM domain protein 3 OS=Homo sapiens GN=PDLIM3 - [PDLI3_HUMAN]	0	0	0	0	0	6.8469	4.83528	5.69422	5.79213	1.00938	0.00498595
Q53SF7-4	Isoform 4 of Cordon-bleu protein-like 1 OS=Homo sapiens GN=COBLL1 - [COBL1_HUMAN]	0	0	0	0	0	0	1.93411	0	0.644704	1.11666	0.211325
Q562E7-4	Isoform 4 of WD repeat-containing protein 81 OS=Homo sapiens GN=WDR81 - [WDR81_HUMAN]	0	0	0	0	0	0	0	0.949037	0.316346	0.547927	0.211325
Q5EBL4-2	Isoform 2 of RILP-like protein 1 OS=Homo sapiens GN=RILPL1 - [RIPL1_HUMAN]	0	0	0	0	0	1.95626	0	0	0.652086	1.12945	0.211325
Q5EBM0-3	Isoform 3 of UMP-CMP kinase 2, mitochondrial OS=Homo sapiens GN=CMPK2 - [CMPK2_HUMAN]	0	0	0	0	0	0	0.967055	0	0.322352	0.55833	0.211325
Q5F1R6	DnaJ homolog subfamily C member 21 OS=Homo sapiens GN=DNAJC21 PE=1 SV=2 - [DJC21_HUMAN]	0	0	0	0	0	0	0	0.949037	0.316346	0.547927	0.211325
Q5H9U9-2	Isoform 2 of Probable ATP-dependent RNA helicase DDX60-like OS=Homo sapiens GN=DDX60L - [DDX6L_HUMAN]	0	0	0	0	0	0.978129	0	0	0.326043	0.564723	0.211325
Q5HY40	Deoxyribonuclease-1-like 1 (Fragment) OS=Homo sapiens GN=DNASE1L1 PE=2 SV=1 - [Q5HY40_HUMAN]	0	0	0	0	0	0.978129	0	0	0.326043	0.564723	0.211325
Q5HYI7-4	Isoform 3 of Metaxin-3 OS=Homo sapiens GN=MTX3 - [MTX3_HUMAN]	0	0	0	0	0	0	0	1.89807	0.632691	1.09585	0.211325
Q5JS74	Peripheral plasma membrane protein CASK OS=Homo sapiens GN=CASK PE=2 SV=1 - [Q5JS74_HUMAN]	0	0	0	0	0	0	0.967055	0	0.322352	0.55833	0.211325
Q5JU07	Dual-specificity protein phosphatase CDC14B (Fragment) OS=Homo sapiens GN=CDC14B PE=2 SV=1 - [Q5JU07_HUMAN]	0	0	0	0	0	0	0.967055	0	0.322352	0.55833	0.211325
Q5JUX0	Spindlin-3 OS=Homo sapiens GN=SPIN3 PE=2 SV=1 - [SPIN3_HUMAN]	0	0	0	0	0	0	1.93411	0	0.644704	1.11666	0.211325
Q5JWM4	Threonine aspartase subunit beta (Fragment) OS=Homo sapiens GN=TASP1 PE=2 SV=1 - [Q5JWM4_HUMAN]	0	0	0	0	0	1.95626	0.967055	0	0.974438	0.97815	0.113292
Q5JXI8	Four and a half LIM domains protein 1 (Fragment) OS=Homo sapiens GN=FHL1 PE=2 SV=1 - [Q5JXI8_HUMAN]	0	0	0	0	0	10.7594	0	0	3.58647	6.21195	0.211325
Q5JYW1	Forkhead-associated domain-containing protein 1 OS=Homo sapiens GN=FHAD1 PE=2 SV=1 - [Q5JYW1_HUMAN]	0	0	0	0	0	0	0	0.949037	0.316346	0.547927	0.211325
Q5JYX0	Cell division control protein 42 homolog (Fragment) OS=Homo sapiens GN=CDC42 PE=2 SV=1 - [Q5JYX0_HUMAN]	0	0	0	0	0	0	0.967055	0	0.322352	0.55833	0.211325
Q5JZ02	TP53-regulating kinase OS=Homo sapiens GN=TP53RK PE=2 SV=1 - [Q5JZ02_HUMAN]	0	0	0	0	0	0.978129	0	0.949037	0.642389	0.556515	0.0917982
Q5JZ08	Hephaestin (Fragment) OS=Homo sapiens GN=HEPH PE=2 SV=1 - [Q5JZ08_HUMAN]	0	0	0	0	0	4.89065	1.93411	1.89807	2.90761	1.71745	0.0496406
Q5QPP3	UDP-glucose 4-epimerase (Fragment) OS=Homo sapiens GN=GALE PE=2 SV=1 - [Q5QPP3_HUMAN]	0	0	0	0	0	2.93439	2.90117	0	1.94518	1.68466	0.0917583
Q5QPQ0	Acyl-protein thioesterase 2 OS=Homo sapiens GN=LYPLA2 PE=2 SV=1 - [Q5QPQ0_HUMAN]	0	0	0	0	0	2.93439	0.967055	1.89807	1.93317	0.984135	0.0382968
Q5RHP9-2	Isoform 2 of Uncharacterized protein C1orf173 OS=Homo sapiens GN=C1orf173 - [CA173_HUMAN]	0	0	0	0	0	0	0	0.949037	0.316346	0.547927	0.211325
Q5SGD2-4	Isoform 4 of Protein phosphatase 1L OS=Homo sapiens GN=PPM1L - [PPM1L_HUMAN]	0	0	0	0	0	2.93439	1.93411	2.84711	2.57187	0.554036	0.00755946
Q5SQ12	Prostaglandin-H2 D-isomerase OS=Homo sapiens GN=PTGDS PE=2 SV=1 - [Q5SQ12_HUMAN]	0	0	0	0	0	2.93439	0	3.79615	2.24351	1.99014	0.0950574
Q5SSJ5	Heterochromatin protein 1-binding protein 3 OS=Homo sapiens GN=HP1BP3 PE=1 SV=1 - [HP1B3_HUMAN]	0	0	0	0	0	78.2503	88.002	81.6172	82.6232	4.95308	0.000597883
Q5SVM6	Ribosomal protein S6 kinase alpha-1 (Fragment) OS=Homo sapiens GN=RPS6KA1 PE=2 SV=1 - [Q5SVM6_HUMAN]	0	0	0	0	0	0	0	0.949037	0.316346	0.547927	0.211325
Q5SVS4	Kidney mitochondrial carrier protein 1 OS=Homo sapiens GN=SLC25A30 PE=2 SV=1 - [KMCP1_HUMAN]	0	0	0	0	0	0	0	1.89807	0.632691	1.09585	0.211325
Q5SY13	Putative uncharacterized protein encoded by COL5A1-AS1 OS=Homo sapiens GN=COL5A1-AS1 PE=5 SV=1 - [COAS1_HUMAN]	0	0	0	0	0	1.95626	0	0	0.652086	1.12945	0.211325
Q5SY80-3	Isoform 3 of Uncharacterized protein C1orf101 OS=Homo sapiens GN=C1orf101 - [CA101_HUMAN]	0	0	0	0	0	0	0	0.949037	0.316346	0.547927	0.211325
Q5SYV2	Sarcosine dehydrogenase, mitochondrial OS=Homo sapiens GN=SARDH PE=2 SV=1 - [Q5SYV2_HUMAN]	0	0	0	0	0	0.978129	0.967055	0	0.648395	0.561554	0.0917583
Q5SZE1	Ceramide synthase 2 (Fragment) OS=Homo sapiens GN=CERS2 PE=2 SV=1 - [Q5SZE1_HUMAN]	0	0	0	0	0	0	2.90117	0	0.967055	1.67499	0.211325
Q5SZL2	Centrosomal protein of 85 kDa-like OS=Homo sapiens GN=CEP85L PE=1 SV=1 - [CE85L_HUMAN]	0	0	0	0	0	0.978129	0	0	0.326043	0.564723	0.211325
Q5SZL3	TBC1 domain family member 7 (Fragment) OS=Homo sapiens GN=TBC1D7 PE=2 SV=1 - [Q5SZL3_HUMAN]	0	0	0	0	0	0	0.967055	0	0.322352	0.55833	0.211325
Q5SZU1	D-3-phosphoglycerate dehydrogenase OS=Homo sapiens GN=PHGDH PE=2 SV=1 - [Q5SZU1_HUMAN]	0	0	0	0	0	3.91252	0	0	1.30417	2.25889	0.211325
Q5T092	Protein RER1 (Fragment) OS=Homo sapiens GN=RER1 PE=2 SV=1 - [Q5T092_HUMAN]	0	0	0	0	0	5.86877	0	6.64326	4.17068	3.63261	0.0925316
Q5T0D2	UMP-CMP kinase OS=Homo sapiens GN=CMPK1 PE=2 SV=1 - [Q5T0D2_HUMAN]	0	0	0	0	0	19.5626	0	0	6.52086	11.2945	0.211325
Q5T165	Golgin subfamily A member 1 (Fragment) OS=Homo sapiens GN=GOLGA1 PE=2 SV=1 - [Q5T165_HUMAN]	0	0	0	0	0	0	0.967055	0	0.322352	0.55833	0.211325
Q5T1W1	Probable ATP-dependent RNA helicase DDX59 (Fragment) OS=Homo sapiens GN=DDX59 PE=2 SV=1 - [Q5T1W1_HUMAN]	0	0	0	0	0	0	0.967055	0	0.322352	0.55833	0.211325
Q5T250	3-keto-steroid reductase (Fragment) OS=Homo sapiens GN=HSD17B7 PE=2 SV=1 - [Q5T250_HUMAN]	0	0	0	0	0	0	0.967055	0	0.322352	0.55833	0.211325
Q5T3Q7	HEAT repeat-containing protein 1 OS=Homo sapiens GN=HEATR1 PE=2 SV=1 - [Q5T3Q7_HUMAN]	0	0	0	0	0	0	0.967055	0	0.322352	0.55833	0.211325
Q5T3R7	Nucleolar GTP-binding protein 1 (Fragment) OS=Homo sapiens GN=GTPBP4 PE=2 SV=1 - [Q5T3R7_HUMAN]	0	0	0	0	0	0	0.967055	0.949037	0.638697	0.553201	0.0917698
Q5T4D3-2	Isoform 2 of Transmembrane and TPR repeat-containing protein 4 OS=Homo sapiens GN=TMTC4 - [TMTC4_HUMAN]	0	0	0	0	0	0	0.967055	0	0.322352	0.55833	0.211325
Q5T4Q0	Vacuolar protein sorting 45 homolog (S. cerevisiae) (Fragment) OS=Homo sapiens GN=VPS45 PE=4 SV=1 - [Q5T4Q0_HUMAN]	0	0	0	0	0	0.978129	0	0.949037	0.642389	0.556515	0.0917982
Q5T4S7-3	Isoform 3 of E3 ubiquitin-protein ligase UBR4 OS=Homo sapiens GN=UBR4 - [UBR4_HUMAN]	0	0	0	0	0	0	0	1.89807	0.632691	1.09585	0.211325
Q5T655	Coiled-coil domain-containing protein 147 OS=Homo sapiens GN=CCDC147 PE=2 SV=1 - [CC147_HUMAN]	0	0	0	0	0	0	0.967055	0	0.322352	0.55833	0.211325
Q5T6H3	Xaa-Pro aminopeptidase 1 (Fragment) OS=Homo sapiens GN=XPNPEP1 PE=2 SV=1 - [Q5T6H3_HUMAN]	0	0	0	0	0	3.91252	0	0	1.30417	2.25889	0.211325
Q5T749	Keratinocyte proline-rich protein OS=Homo sapiens GN=KPRP PE=1 SV=1 - [KPRP_HUMAN]	0	0	0	0	0	0	0.967055	0	0.322352	0.55833	0.211325
Q5T757	Serine/arginine-rich-splicing factor 11 OS=Homo sapiens GN=SRSF11 PE=2 SV=1 - [Q5T757_HUMAN]	0	0	0	0	0	0	0.967055	0	0.322352	0.55833	0.211325
Q5T7C4	High mobility group protein B1 OS=Homo sapiens GN=HMGB1 PE=4 SV=1 - [Q5T7C4_HUMAN]	0	0	0	0	0	0	34.814	0	11.6047	20.0999	0.211325
Q5T8A0	28S ribosomal protein S2, mitochondrial (Fragment) OS=Homo sapiens GN=MRPS2 PE=2 SV=1 - [Q5T8A0_HUMAN]	0	0	0	0	0	0	0	0.949037	0.316346	0.547927	0.211325
Q5T8F0	Cathepsin L1 light chain OS=Homo sapiens GN=CTSL1 PE=2 SV=1 - [Q5T8F0_HUMAN]	0	0	0	0	0	0.978129	0	0	0.326043	0.564723	0.211325
Q5T8N1	Nuclear pore complex protein Nup133 OS=Homo sapiens GN=NUP133 PE=2 SV=1 - [Q5T8N1_HUMAN]	0	0	0	0	0	0.978129	0	0	0.326043	0.564723	0.211325
Q5TAE8	ERO1-like protein beta (Fragment) OS=Homo sapiens GN=ERO1LB PE=2 SV=1 - [Q5TAE8_HUMAN]	0	0	0	0	0	2.93439	0.967055	0	1.30048	1.49534	0.135475
Q5TBH0	Serine/threonine-protein kinase Nek6 (Fragment) OS=Homo sapiens GN=NEK6 PE=2 SV=1 - [Q5TBH0_HUMAN]	0	0	0	0	0	0	0.967055	0.949037	0.638697	0.553201	0.0917698
Q5TBJ2	MFS-type transporter SLC18B1 OS=Homo sapiens GN=SLC18B1 PE=2 SV=1 - [Q5TBJ2_HUMAN]	0	0	0	0	0	0	0	0.949037	0.316346	0.547927	0.211325
Q5TCZ1-2	Isoform 2 of SH3 and PX domain-containing protein 2A OS=Homo sapiens GN=SH3PXD2A - [SPD2A_HUMAN]	0	0	0	0	0	0.978129	0	0	0.326043	0.564723	0.211325
Q5TDG6	Sperm-associated antigen 17 (Fragment) OS=Homo sapiens GN=SPAG17 PE=2 SV=1 - [Q5TDG6_HUMAN]	0	0	0	0	0	0	0	0.949037	0.316346	0.547927	0.211325
Q5TEZ5	Uncharacterized protein C6orf163 OS=Homo sapiens GN=C6orf163 PE=1 SV=2 - [CF163_HUMAN]	0	0	0	0	0	0	1.93411	0.949037	0.961049	0.967111	0.113678
Q5TFQ8	Signal-regulatory protein beta-1 isoform 3 OS=Homo sapiens GN=SIRPB1 PE=1 SV=1 - [SIRBL_HUMAN]	0	0	0	0	0	0	0	0.949037	0.316346	0.547927	0.211325
Q5TG40	DNA methyltransferase 1-associated protein 1 (Fragment) OS=Homo sapiens GN=DMAP1 PE=2 SV=1 - [Q5TG40_HUMAN]	0	0	0	0	0	0.978129	0	0.949037	0.642389	0.556515	0.0917982
Q5TG79	Voltage-gated potassium channel subunit beta-2 (Fragment) OS=Homo sapiens GN=KCNAB2 PE=2 SV=1 - [Q5TG79_HUMAN]	0	0	0	0	0	0	0.967055	0	0.322352	0.55833	0.211325
Q5TH69	Brefeldin A-inhibited guanine nucleotide-exchange protein 3 OS=Homo sapiens GN=ARFGEF3 PE=1 SV=3 - [BIG3_HUMAN]	0	0	0	0	0	0.978129	0	0	0.326043	0.564723	0.211325
Q5UCC4-2	Isoform 2 of ER membrane protein complex subunit 10 OS=Homo sapiens GN=EMC10 - [EMC10_HUMAN]	0	0	0	0	0	0.978129	1.93411	1.89807	1.60344	0.541833	0.0180096
Q5VT94	Growth hormone-inducible transmembrane protein OS=Homo sapiens GN=GHITM PE=2 SV=1 - [Q5VT94_HUMAN]	0	0	0	0	0	0.978129	0	0	0.326043	0.564723	0.211325
Q5VTH2	UPF0740 protein C1orf192 OS=Homo sapiens GN=C1orf192 PE=2 SV=1 - [CA192_HUMAN]	0	0	0	0	0	0	0	0.949037	0.316346	0.547927	0.211325
Q5VTR2	E3 ubiquitin-protein ligase BRE1A OS=Homo sapiens GN=RNF20 PE=1 SV=2 - [BRE1A_HUMAN]	0	0	0	0	0	0.978129	0.967055	0	0.648395	0.561554	0.0917583
Q5VU43-6	Isoform 6 of Myomegalin OS=Homo sapiens GN=PDE4DIP - [MYOME_HUMAN]	0	0	0	0	0	0	0	1.89807	0.632691	1.09585	0.211325
Q5VU58	Tropomyosin 3, isoform CRA_b OS=Homo sapiens GN=TPM3 PE=3 SV=1 - [Q5VU58_HUMAN]	0	0	0	0	0	167.26	0	162.285	109.848	95.1641	0.0917982
Q5VUC9	Ribonuclease P protein subunit p38 OS=Homo sapiens GN=RPP38 PE=2 SV=2 - [Q5VUC9_HUMAN]	0	0	0	0	0	0	0.967055	0	0.322352	0.55833	0.211325
Q5VUY2	Arylacetamide deacetylase-like 4 OS=Homo sapiens GN=AADACL4 PE=2 SV=1 - [ADCL4_HUMAN]	0	0	0	0	0	0.978129	0	0	0.326043	0.564723	0.211325
Q5VW38-3	Isoform 3 of Protein GPR107 OS=Homo sapiens GN=GPR107 - [GP107_HUMAN]	0	0	0	0	0	0.978129	0.967055	0	0.648395	0.561554	0.0917583
Q5VWG9	Transcription initiation factor TFIID subunit 3 OS=Homo sapiens GN=TAF3 PE=1 SV=1 - [TAF3_HUMAN]	0	0	0	0	0	0	0.967055	0	0.322352	0.55833	0.211325
Q5W0A0-2	Isoform 2 of Protein FAM194B OS=Homo sapiens GN=FAM194B - [F194B_HUMAN]	0	0	0	0	0	0.978129	0	0	0.326043	0.564723	0.211325
Q5XKE5	Keratin, type II cytoskeletal 79 OS=Homo sapiens GN=KRT79 PE=1 SV=2 - [K2C79_HUMAN]	0	0	0	0	0	0	0	50.2989	16.7663	29.0401	0.211325
Q5XKP0	Protein QIL1 OS=Homo sapiens GN=QIL1 PE=1 SV=1 - [QIL1_HUMAN]	0	0	0	0	0	0	0	0.949037	0.316346	0.547927	0.211325
Q629K1	Triple QxxK/R motif-containing protein OS=Homo sapiens GN=TRIQK PE=2 SV=1 - [TRIQK_HUMAN]	0	0	0	0	0	0	0.967055	0	0.322352	0.55833	0.211325
Q643R3	Lysophospholipid acyltransferase LPCAT4 OS=Homo sapiens GN=LPCAT4 PE=1 SV=1 - [LPCT4_HUMAN]	0	0	0	0	0	0	0.967055	0.949037	0.638697	0.553201	0.0917698
Q64LD2-2	Isoform 2 of WD repeat-containing protein 25 OS=Homo sapiens GN=WDR25 - [WDR25_HUMAN]	0	0	0	0	0	0	0.967055	0.949037	0.638697	0.553201	0.0917698
Q659C4-7	Isoform 7 of La-related protein 1B OS=Homo sapiens GN=LARP1B - [LAR1B_HUMAN]	0	0	0	0	0	0	2.90117	0	0.967055	1.67499	0.211325
Q68CJ6	Nuclear GTPase SLIP-GC OS=Homo sapiens GN=NUGGC PE=2 SV=3 - [SLIP_HUMAN]	0	0	0	0	0	0	0	0.949037	0.316346	0.547927	0.211325
Q6AHZ8	Beta-ureidopropionase OS=Homo sapiens GN=DKFZp779O1248 PE=2 SV=1 - [Q6AHZ8_HUMAN]	0	0	0	0	0	0	0	0.949037	0.316346	0.547927	0.211325
Q6DKJ4	Nucleoredoxin OS=Homo sapiens GN=NXN PE=1 SV=2 - [NXN_HUMAN]	0	0	0	0	0	0.978129	0.967055	0	0.648395	0.561554	0.0917583
Q6GYQ0-3	Isoform 3 of Ral GTPase-activating protein subunit alpha-1 OS=Homo sapiens GN=RALGAPA1 - [RGPA1_HUMAN]	0	0	0	0	0	0.978129	0.967055	0	0.648395	0.561554	0.0917583
Q6I9Y2	THO complex subunit 7 homolog OS=Homo sapiens GN=THOC7 PE=1 SV=3 - [THOC7_HUMAN]	0	0	0	0	0	1.95626	0	0.949037	0.968432	0.978273	0.114274
Q6IC98	GRAM domain-containing protein 4 OS=Homo sapiens GN=GRAMD4 PE=1 SV=1 - [GRAM4_HUMAN]	0	0	0	0	0	11.7375	6.76939	8.54133	9.01609	2.51788	0.0125123
Q6IN85-4	Isoform 4 of Serine/threonine-protein phosphatase 4 regulatory subunit 3A OS=Homo sapiens GN=SMEK1 - [P4R3A_HUMAN]	0	0	0	0	0	0	1.93411	0	0.644704	1.11666	0.211325
Q6IPW1-2	Isoform 2 of Uncharacterized protein C11orf71 OS=Homo sapiens GN=C11orf71 - [CK071_HUMAN]	0	0	0	0	0	0	0.967055	0.949037	0.638697	0.553201	0.0917698
Q6N069-5	Isoform 5 of N-alpha-acetyltransferase 16, NatA auxiliary subunit OS=Homo sapiens GN=NAA16 - [NAA16_HUMAN]	0	0	0	0	0	0	0.967055	0	0.322352	0.55833	0.211325
Q6P1X6-2	Isoform 2 of UPF0598 protein C8orf82 OS=Homo sapiens GN=C8orf82 - [CH082_HUMAN]	0	0	0	0	0	0	0.967055	0	0.322352	0.55833	0.211325
Q6P275	Cohesin subunit SA-1 OS=Homo sapiens GN=STAG1 PE=2 SV=1 - [Q6P275_HUMAN]	0	0	0	0	0	1.95626	2.90117	4.74518	3.20087	1.41841	0.0298292
Q6P2G0	ADAM metallopeptidase domain 2 (Fertilin beta), isoform CRA_b OS=Homo sapiens GN=ADAM2 PE=2 SV=1 - [Q6P2G0_HUMAN]	0	0	0	0	0	0	0.967055	0	0.322352	0.55833	0.211325
Q6P2Q9	Pre-mRNA-processing-splicing factor 8 OS=Homo sapiens GN=PRPF8 PE=1 SV=2 - [PRP8_HUMAN]	0	0	0	0	0	0	1.93411	0	0.644704	1.11666	0.211325
Q6P499-3	Isoform 3 of NIPA-like protein 3 OS=Homo sapiens GN=NIPAL3 - [NPAL3_HUMAN]	0	0	0	0	0	0	0.967055	0	0.322352	0.55833	0.211325
Q6P4E1	Protein CASC4 OS=Homo sapiens GN=CASC4 PE=1 SV=1 - [CASC4_HUMAN]	0	0	0	0	0	0	0.967055	0	0.322352	0.55833	0.211325
Q6P589	Tumor necrosis factor alpha-induced protein 8-like protein 2 OS=Homo sapiens GN=TNFAIP8L2 PE=1 SV=1 - [TP8L2_HUMAN]	0	0	0	0	0	0	1.93411	2.84711	1.59374	1.45375	0.0989973
Q6P9A2	Polypeptide N-acetylgalactosaminyltransferase 18 OS=Homo sapiens GN=GALNT18 PE=2 SV=2 - [GLT18_HUMAN]	0	0	0	0	0	0.978129	0	0	0.326043	0.564723	0.211325
Q6PCT2-3	Isoform 3 of F-box/LRR-repeat protein 19 OS=Homo sapiens GN=FBXL19 - [FXL19_HUMAN]	0	0	0	0	0	0	0	0.949037	0.316346	0.547927	0.211325
Q6PD62	RNA polymerase-associated protein CTR9 homolog OS=Homo sapiens GN=CTR9 PE=1 SV=1 - [CTR9_HUMAN]	0	0	0	0	0	0	0	0.949037	0.316346	0.547927	0.211325
Q6PIU2-3	Isoform 3 of Neutral cholesterol ester hydrolase 1 OS=Homo sapiens GN=NCEH1 - [NCEH1_HUMAN]	0	0	0	0	0	2.93439	1.93411	2.84711	2.57187	0.554036	0.00755946
Q6PL24	Protein TMED8 OS=Homo sapiens GN=TMED8 PE=1 SV=1 - [TMED8_HUMAN]	0	0	0	0	0	0.978129	0.967055	0	0.648395	0.561554	0.0917583
Q6QNY1	Biogenesis of lysosome-related organelles complex 1 subunit 2 OS=Homo sapiens GN=BLOC1S2 PE=1 SV=1 - [BL1S2_HUMAN]	0	0	0	0	0	0.978129	0	0	0.326043	0.564723	0.211325
Q6UB28	Methionine aminopeptidase 1D, mitochondrial OS=Homo sapiens GN=METAP1D PE=1 SV=1 - [AMP1D_HUMAN]	0	0	0	0	0	0	0	0.949037	0.316346	0.547927	0.211325
Q6UVY6	DBH-like monooxygenase protein 1 OS=Homo sapiens GN=MOXD1 PE=2 SV=1 - [MOXD1_HUMAN]	0	0	0	0	0	0	2.90117	0	0.967055	1.67499	0.211325
Q6UWH4-3	Isoform 3 of Protein FAM198B OS=Homo sapiens GN=FAM198B - [F198B_HUMAN]	0	0	0	0	0	0	0	0.949037	0.316346	0.547927	0.211325
Q6UWU2	Beta-galactosidase-1-like protein OS=Homo sapiens GN=GLB1L PE=2 SV=1 - [GLB1L_HUMAN]	0	0	0	0	0	0	2.90117	0	0.967055	1.67499	0.211325
Q6UX06	Olfactomedin-4 OS=Homo sapiens GN=OLFM4 PE=1 SV=1 - [OLFM4_HUMAN]	0	0	0	0	0	0.978129	1.93411	0.949037	1.28709	0.560523	0.0288964
Q6UXD5-6	Isoform 6 of Seizure 6-like protein 2 OS=Homo sapiens GN=SEZ6L2 - [SE6L2_HUMAN]	0	0	0	0	0	0	0.967055	0	0.322352	0.55833	0.211325
Q6UXI7-3	Isoform 3 of Vitrin OS=Homo sapiens GN=VIT - [VITRN_HUMAN]	0	0	0	0	0	0	0.967055	0	0.322352	0.55833	0.211325
Q6UXN9	WD repeat-containing protein 82 OS=Homo sapiens GN=WDR82 PE=1 SV=1 - [WDR82_HUMAN]	0	0	0	0	0	1.95626	0	0	0.652086	1.12945	0.211325
Q6UXU1	Putative uncharacterized protein UNQ6490/PRO21339 OS=Homo sapiens GN=UNQ6490/PRO21339 PE=5 SV=1 - [YC002_HUMAN]	0	0	0	0	0	0	0.967055	0	0.322352	0.55833	0.211325
Q6V3B1	MAX protein OS=Homo sapiens GN=MAX PE=2 SV=1 - [Q6V3B1_HUMAN]	0	0	0	0	0	0	0.967055	1.89807	0.955043	0.949094	0.111736
Q6WCQ1	Myosin phosphatase Rho-interacting protein OS=Homo sapiens GN=MPRIP PE=1 SV=3 - [MPRIP_HUMAN]	0	0	0	0	0	35.2126	35.781	32.2672	34.4203	1.88614	0.000499709
Q6WKZ4-1	Isoform 3 of Rab11 family-interacting protein 1 OS=Homo sapiens GN=RAB11FIP1 - [RFIP1_HUMAN]	0	0	0	0	0	0	0	0.949037	0.316346	0.547927	0.211325
Q6WRI0	Immunoglobulin superfamily member 10 OS=Homo sapiens GN=IGSF10 PE=2 SV=1 - [IGS10_HUMAN]	0	0	0	0	0	0	0.967055	0	0.322352	0.55833	0.211325
Q6XQN6-3	Isoform 3 of Nicotinate phosphoribosyltransferase OS=Homo sapiens GN=NAPRT1 - [PNCB_HUMAN]	0	0	0	0	0	0	3.86822	4.74518	2.87113	2.52484	0.0938514
Q6YHK3-4	Isoform 4 of CD109 antigen OS=Homo sapiens GN=CD109 - [CD109_HUMAN]	0	0	0	0	0	0	12.5717	12.3375	8.30307	7.19162	0.0917698
Q6YP21-2	Isoform 2 of Kynurenine--oxoglutarate transaminase 3 OS=Homo sapiens GN=CCBL2 - [KAT3_HUMAN]	0	0	0	0	0	0.978129	0	1.89807	0.958734	0.949185	0.111157
Q6ZMI0-2	Isoform 2 of Protein phosphatase 1 regulatory subunit 21 OS=Homo sapiens GN=PPP1R21 - [PPR21_HUMAN]	0	0	0	0	0	2.93439	5.80233	0	2.91224	2.90123	0.112116
Q6ZMP0-2	Isoform 2 of Thrombospondin type-1 domain-containing protein 4 OS=Homo sapiens GN=THSD4 - [THSD4_HUMAN]	0	0	0	0	0	0	0	0.949037	0.316346	0.547927	0.211325
Q6ZNE9	RUN and FYVE domain-containing protein 4 OS=Homo sapiens GN=RUFY4 PE=2 SV=2 - [RUFY4_HUMAN]	0	0	0	0	0	0	0.967055	0	0.322352	0.55833	0.211325
Q6ZRP7	Sulfhydryl oxidase 2 OS=Homo sapiens GN=QSOX2 PE=1 SV=3 - [QSOX2_HUMAN]	0	0	0	0	0	3.91252	1.93411	0	1.94888	1.9563	0.113292
Q6ZRS2-3	Isoform 3 of Helicase SRCAP OS=Homo sapiens GN=SRCAP - [SRCAP_HUMAN]	0	0	0	0	0	0	0	0.949037	0.316346	0.547927	0.211325
Q6ZSJ8	Uncharacterized protein C1orf122 OS=Homo sapiens GN=C1orf122 PE=2 SV=2 - [CA122_HUMAN]	0	0	0	0	0	0.978129	0	0	0.326043	0.564723	0.211325
Q6ZSL4	Secreted frizzled-related protein 1 OS=Homo sapiens GN=SFRP1 PE=2 SV=1 - [Q6ZSL4_HUMAN]	0	0	0	0	0	0.978129	0	0	0.326043	0.564723	0.211325
Q6ZT07	TBC1 domain family member 9 OS=Homo sapiens GN=TBC1D9 PE=2 SV=2 - [TBCD9_HUMAN]	0	0	0	0	0	0.978129	0.967055	0	0.648395	0.561554	0.0917583
Q6ZTW0-2	Isoform 2 of Tubulin polyglutamylase complex subunit 1 OS=Homo sapiens GN=TPGS1 - [TPGS1_HUMAN]	0	0	0	0	0	0.978129	0	0	0.326043	0.564723	0.211325
Q6ZW49-2	Isoform 3 of PAX-interacting protein 1 OS=Homo sapiens GN=PAXIP1 - [PAXI1_HUMAN]	0	0	0	0	0	0.978129	0	0	0.326043	0.564723	0.211325
Q719H8	Copine-2 OS=Homo sapiens GN=CPNE2 PE=2 SV=1 - [Q719H8_HUMAN]	0	0	0	0	0	5.86877	4.83528	6.64326	5.78244	0.907077	0.00405146
Q71F23-2	Isoform 2 of Centromere protein U OS=Homo sapiens GN=MLF1IP - [CENPU_HUMAN]	0	0	0	0	0	0.978129	0	0	0.326043	0.564723	0.211325
Q765I0	Urotensin-2B OS=Homo sapiens GN=UTS2B PE=2 SV=2 - [UTS2B_HUMAN]	0	0	0	0	0	0	0	0.949037	0.316346	0.547927	0.211325
Q76FK4-3	Isoform 3 of Nucleolar protein 8 OS=Homo sapiens GN=NOL8 - [NOL8_HUMAN]	0	0	0	0	0	0	0.967055	0	0.322352	0.55833	0.211325
Q76KD6	Speriolin OS=Homo sapiens GN=SPATC1 PE=2 SV=2 - [SPERI_HUMAN]	0	0	0	0	0	0.978129	0	0	0.326043	0.564723	0.211325
Q76M96	Coiled-coil domain-containing protein 80 OS=Homo sapiens GN=CCDC80 PE=1 SV=1 - [CCD80_HUMAN]	0	0	0	0	0	2.93439	0	0	0.978129	1.69417	0.211325
Q7KZ85-3	Isoform 3 of Transcription elongation factor SPT6 OS=Homo sapiens GN=SUPT6H - [SPT6H_HUMAN]	0	0	0	0	0	0	0	0.949037	0.316346	0.547927	0.211325
Q7L0X0	TLR4 interactor with leucine rich repeats OS=Homo sapiens GN=TRIL PE=1 SV=2 - [TRIL_HUMAN]	0	0	0	0	0	0	0	0.949037	0.316346	0.547927	0.211325
Q7L1S5	Carbohydrate sulfotransferase 9 OS=Homo sapiens GN=CHST9 PE=2 SV=2 - [CHST9_HUMAN]	0	0	0	0	0	0	0	0.949037	0.316346	0.547927	0.211325
Q7L1W9	DGUOK protein OS=Homo sapiens GN=DGUOK PE=4 SV=1 - [Q7L1W9_HUMAN]	0	0	0	0	0	0	0	0.949037	0.316346	0.547927	0.211325
Q7L8L6	FAST kinase domain-containing protein 5 OS=Homo sapiens GN=FASTKD5 PE=1 SV=1 - [FAKD5_HUMAN]	0	0	0	0	0	0.978129	0	0	0.326043	0.564723	0.211325
Q7Z2V1	Protein TNT OS=Homo sapiens GN=C16orf82 PE=2 SV=1 - [TNT_HUMAN]	0	0	0	0	0	0	0.967055	0	0.322352	0.55833	0.211325
Q7Z304	MAM domain-containing protein 2 OS=Homo sapiens GN=MAMDC2 PE=2 SV=3 - [MAMC2_HUMAN]	0	0	0	0	0	1.95626	0	2.84711	1.60112	1.4564	0.0985969
Q7Z3D4	LysM and putative peptidoglycan-binding domain-containing protein 3 OS=Homo sapiens GN=LYSMD3 PE=1 SV=2 - [LYSM3_HUMAN]	0	0	0	0	0	0.978129	0	0.949037	0.642389	0.556515	0.0917982
Q7Z3D6-3	Isoform 3 of UPF0317 protein C14orf159, mitochondrial OS=Homo sapiens GN=C14orf159 - [CN159_HUMAN]	0	0	0	0	0	6.8469	0	0	2.2823	3.95306	0.211325
Q7Z417	Nuclear fragile X mental retardation-interacting protein 2 OS=Homo sapiens GN=NUFIP2 PE=1 SV=1 - [NUFP2_HUMAN]	0	0	0	0	0	0.978129	0	0	0.326043	0.564723	0.211325
Q7Z434-4	Isoform 4 of Mitochondrial antiviral-signaling protein OS=Homo sapiens GN=MAVS - [MAVS_HUMAN]	0	0	0	0	0	1.95626	0.967055	0	0.974438	0.97815	0.113292
Q7Z460-2	Isoform 2 of CLIP-associating protein 1 OS=Homo sapiens GN=CLASP1 - [CLAP1_HUMAN]	0	0	0	0	0	4.89065	3.86822	0	2.91962	2.57963	0.094505
Q7Z5J8-3	Isoform 3 of Ankyrin and armadillo repeat-containing protein OS=Homo sapiens GN=ANKAR - [ANKAR_HUMAN]	0	0	0	0	0	0	0.967055	0	0.322352	0.55833	0.211325
Q7Z5L7	Podocan OS=Homo sapiens GN=PODN PE=1 SV=2 - [PODN_HUMAN]	0	0	0	0	0	0	1.93411	0.949037	0.961049	0.967111	0.113678
Q7Z6K5	UPF0552 protein C15orf38 OS=Homo sapiens GN=C15orf38 PE=2 SV=1 - [CO038_HUMAN]	0	0	0	0	0	0	0	2.84711	0.949037	1.64378	0.211325
Q7Z7H3	Uncharacterized protein C2orf62 OS=Homo sapiens GN=C2orf62 PE=2 SV=1 - [CB062_HUMAN]	0	0	0	0	0	0	0	0.949037	0.316346	0.547927	0.211325
Q7Z7H8	39S ribosomal protein L10, mitochondrial OS=Homo sapiens GN=MRPL10 PE=1 SV=3 - [RM10_HUMAN]	0	0	0	0	0	0	0.967055	0	0.322352	0.55833	0.211325
Q7Z7N9	Transmembrane protein 179B OS=Homo sapiens GN=TMEM179B PE=1 SV=1 - [T179B_HUMAN]	0	0	0	0	0	0	2.90117	0.949037	1.2834	1.4792	0.13588
Q86T03	Transmembrane protein 55B OS=Homo sapiens GN=TMEM55B PE=1 SV=1 - [TM55B_HUMAN]	0	0	0	0	0	0	3.86822	0	1.28941	2.23332	0.211325
Q86T13	C-type lectin domain family 14 member A OS=Homo sapiens GN=CLEC14A PE=1 SV=1 - [CLC14_HUMAN]	0	0	0	0	0	0.978129	0.967055	0.949037	0.96474	0.0146837	3.86052e-05
Q86U42-2	Isoform 2 of Polyadenylate-binding protein 2 OS=Homo sapiens GN=PABPN1 - [PABP2_HUMAN]	0	0	0	0	0	0	4.83528	0	1.61176	2.79165	0.211325
Q86U86-6	Isoform 6 of Protein polybromo-1 OS=Homo sapiens GN=PBRM1 - [PB1_HUMAN]	0	0	0	0	0	0	0.967055	0	0.322352	0.55833	0.211325
Q86UK0-2	Isoform 2 of ATP-binding cassette sub-family A member 12 OS=Homo sapiens GN=ABCA12 - [ABCAC_HUMAN]	0	0	0	0	0	0	0.967055	0	0.322352	0.55833	0.211325
Q86UQ4	ATP-binding cassette sub-family A member 13 OS=Homo sapiens GN=ABCA13 PE=2 SV=3 - [ABCAD_HUMAN]	0	0	0	0	0	0	0	0.949037	0.316346	0.547927	0.211325
Q86V48-2	Isoform 2 of Leucine zipper protein 1 OS=Homo sapiens GN=LUZP1 - [LUZP1_HUMAN]	0	0	0	0	0	0	0	0.949037	0.316346	0.547927	0.211325
Q86VR2	Protein FAM134C OS=Homo sapiens GN=FAM134C PE=1 SV=1 - [F134C_HUMAN]	0	0	0	0	0	0	0	5.69422	1.89807	3.28756	0.211325
Q86W92-3	Isoform 3 of Liprin-beta-1 OS=Homo sapiens GN=PPFIBP1 - [LIPB1_HUMAN]	0	0	0	0	0	4.89065	0	0	1.63022	2.82362	0.211325
Q86XU0	Zinc finger protein 677 OS=Homo sapiens GN=ZNF677 PE=2 SV=1 - [ZN677_HUMAN]	0	0	0	0	0	0	0	0.949037	0.316346	0.547927	0.211325
Q86Y82	Syntaxin-12 OS=Homo sapiens GN=STX12 PE=1 SV=1 - [STX12_HUMAN]	0	0	0	0	0	0	0	9.49037	3.16346	5.47927	0.211325
Q86YJ6-5	Isoform SOLAT of Threonine synthase-like 2 OS=Homo sapiens GN=THNSL2 - [THNS2_HUMAN]	0	0	0	0	0	0.978129	0	0	0.326043	0.564723	0.211325
Q86YV6	Myosin light chain kinase family member 4 OS=Homo sapiens GN=MYLK4 PE=1 SV=2 - [MYLK4_HUMAN]	0	0	0	0	0	0	0	3.79615	1.26538	2.19171	0.211325
Q86YW5-2	Isoform 2 of Trem-like transcript 1 protein OS=Homo sapiens GN=TREML1 - [TRML1_HUMAN]	0	0	0	0	0	0	0.967055	0	0.322352	0.55833	0.211325
Q8IU85-2	Isoform 2 of Calcium/calmodulin-dependent protein kinase type 1D OS=Homo sapiens GN=CAMK1D - [KCC1D_HUMAN]	0	0	0	0	0	0	0	1.89807	0.632691	1.09585	0.211325
Q8IUH3-2	Isoform 2 of RNA-binding protein 45 OS=Homo sapiens GN=RBM45 - [RBM45_HUMAN]	0	0	0	0	0	0.978129	0	0	0.326043	0.564723	0.211325
Q8IV36-3	Isoform 3 of Protein HID1 OS=Homo sapiens GN=HID1 - [HID1_HUMAN]	0	0	0	0	0	0	0	0.949037	0.316346	0.547927	0.211325
Q8IVF2-3	Isoform 3 of Protein AHNAK2 OS=Homo sapiens GN=AHNAK2 - [AHNK2_HUMAN]	0	0	0	0	0	2.93439	1.93411	3.79615	2.88821	0.931876	0.0164964
Q8IVF7-2	Isoform 2 of Formin-like protein 3 OS=Homo sapiens GN=FMNL3 - [FMNL3_HUMAN]	0	0	0	0	0	0	0.967055	0	0.322352	0.55833	0.211325
Q8IVI9-3	Isoform 3 of Nostrin OS=Homo sapiens GN=NOSTRIN - [NOSTN_HUMAN]	0	0	0	0	0	0	0.967055	0	0.322352	0.55833	0.211325
Q8IW45-3	Isoform 3 of ATP-dependent (S)-NAD(P)H-hydrate dehydratase OS=Homo sapiens GN=CARKD - [NNRD_HUMAN]	0	0	0	0	0	0	0	3.79615	1.26538	2.19171	0.211325
Q8IWB1	Inositol 1,4,5-trisphosphate receptor-interacting protein OS=Homo sapiens GN=ITPRIP PE=1 SV=1 - [IPRI_HUMAN]	0	0	0	0	0	0	0.967055	0	0.322352	0.55833	0.211325
Q8IWX8	Calcium homeostasis endoplasmic reticulum protein OS=Homo sapiens GN=CHERP PE=1 SV=3 - [CHERP_HUMAN]	0	0	0	0	0	0	0.967055	0	0.322352	0.55833	0.211325
Q8IWY9-1	Isoform 1 of Codanin-1 OS=Homo sapiens GN=CDAN1 - [CDAN1_HUMAN]	0	0	0	0	0	0	0	0.949037	0.316346	0.547927	0.211325
Q8IX12-2	Isoform 2 of Cell division cycle and apoptosis regulator protein 1 OS=Homo sapiens GN=CCAR1 - [CCAR1_HUMAN]	0	0	0	0	0	1.95626	1.93411	2.84711	2.24583	0.520845	0.00873015
Q8IXB1	DnaJ homolog subfamily C member 10 OS=Homo sapiens GN=DNAJC10 PE=1 SV=2 - [DJC10_HUMAN]	0	0	0	0	0	2.93439	1.93411	2.84711	2.57187	0.554036	0.00755946
Q8IXJ9-2	Isoform 2 of Putative Polycomb group protein ASXL1 OS=Homo sapiens GN=ASXL1 - [ASXL1_HUMAN]	0	0	0	0	0	0.978129	0	0	0.326043	0.564723	0.211325
Q8IXN4	MAK protein OS=Homo sapiens GN=MAK PE=2 SV=1 - [Q8IXN4_HUMAN]	0	0	0	0	0	2.93439	0	0	0.978129	1.69417	0.211325
Q8IXP5	Uncharacterized protein C11orf53 OS=Homo sapiens GN=C11orf53 PE=2 SV=1 - [CK053_HUMAN]	0	0	0	0	0	0	0	0.949037	0.316346	0.547927	0.211325
Q8IY31-4	Isoform 4 of Intraflagellar transport protein 20 homolog OS=Homo sapiens GN=IFT20 - [IFT20_HUMAN]	0	0	0	0	0	0	0	0.949037	0.316346	0.547927	0.211325
Q8IY67	Ribonucleoprotein PTB-binding 1 OS=Homo sapiens GN=RAVER1 PE=1 SV=1 - [RAVR1_HUMAN]	0	0	0	0	0	0	3.86822	2.84711	2.23844	2.00465	0.096391
Q8IY81	pre-rRNA processing protein FTSJ3 OS=Homo sapiens GN=FTSJ3 PE=1 SV=2 - [SPB1_HUMAN]	0	0	0	0	0	0	1.93411	0	0.644704	1.11666	0.211325
Q8IY84	Serine/threonine-protein kinase NIM1 OS=Homo sapiens GN=NIM1 PE=1 SV=1 - [NIM1_HUMAN]	0	0	0	0	0	0	0.967055	0	0.322352	0.55833	0.211325
Q8IYT1	Protein FAM71A OS=Homo sapiens GN=FAM71A PE=2 SV=2 - [FA71A_HUMAN]	0	0	0	0	0	0	0	0.949037	0.316346	0.547927	0.211325
Q8IZ07	Ankyrin repeat domain-containing protein 13A OS=Homo sapiens GN=ANKRD13A PE=1 SV=3 - [AN13A_HUMAN]	0	0	0	0	0	0	1.93411	0	0.644704	1.11666	0.211325
Q8IZA3	Histone H1oo OS=Homo sapiens GN=H1FOO PE=2 SV=1 - [H1FOO_HUMAN]	0	0	0	0	0	1.95626	0.967055	0.949037	1.29078	0.576388	0.0302488
Q8IZD0	Sterile alpha motif domain-containing protein 14 OS=Homo sapiens GN=SAMD14 PE=2 SV=2 - [SAM14_HUMAN]	0	0	0	0	0	0.978129	0	0	0.326043	0.564723	0.211325
Q8IZD9	Dedicator of cytokinesis protein 3 OS=Homo sapiens GN=DOCK3 PE=1 SV=1 - [DOCK3_HUMAN]	0	0	0	0	0	0	0	1.89807	0.632691	1.09585	0.211325
Q8IZF6-3	Isoform 3 of Probable G-protein coupled receptor 112 OS=Homo sapiens GN=GPR112 - [GP112_HUMAN]	0	0	0	0	0	0.978129	0	0	0.326043	0.564723	0.211325
Q8IZT8	Heparan sulfate glucosamine 3-O-sulfotransferase 5 OS=Homo sapiens GN=HS3ST5 PE=1 SV=1 - [HS3S5_HUMAN]	0	0	0	0	0	1.95626	3.86822	0	1.94149	1.93415	0.112116
Q8IZU2-2	Isoform 2 of WD repeat-containing protein 17 OS=Homo sapiens GN=WDR17 - [WDR17_HUMAN]	0	0	0	0	0	0	0	0.949037	0.316346	0.547927	0.211325
Q8N0U8	Vitamin K epoxide reductase complex subunit 1-like protein 1 OS=Homo sapiens GN=VKORC1L1 PE=1 SV=2 - [VKORL_HUMAN]	0	0	0	0	0	0	0.967055	0	0.322352	0.55833	0.211325
Q8N0Y7	Probable phosphoglycerate mutase 4 OS=Homo sapiens GN=PGAM4 PE=2 SV=1 - [PGAM4_HUMAN]	0	0	0	0	0	18.5845	0	0	6.19482	10.7297	0.211325
Q8N196	Homeobox protein SIX5 OS=Homo sapiens GN=SIX5 PE=1 SV=3 - [SIX5_HUMAN]	0	0	0	0	0	0.978129	0	0	0.326043	0.564723	0.211325
Q8N1F8-2	Isoform 2 of Serine/threonine-protein kinase 11-interacting protein OS=Homo sapiens GN=STK11IP - [S11IP_HUMAN]	0	0	0	0	0	0	0	0.949037	0.316346	0.547927	0.211325
Q8N1N4-2	Isoform 2 of Keratin, type II cytoskeletal 78 OS=Homo sapiens GN=KRT78 - [K2C78_HUMAN]	0	0	0	0	0	30.322	28.0446	0	19.4555	16.8874	0.0920621
Q8N436	Inactive carboxypeptidase-like protein X2 OS=Homo sapiens GN=CPXM2 PE=2 SV=3 - [CPXM2_HUMAN]	0	0	0	0	0	6.8469	7.73644	0	4.86112	4.23328	0.0925091
Q8N4T8-2	Isoform 2 of Carbonyl reductase family member 4 OS=Homo sapiens GN=CBR4 - [CBR4_HUMAN]	0	0	0	0	0	3.91252	1.93411	4.74518	3.5306	1.44393	0.0257428
Q8N4X5-3	Isoform 3 of Actin filament-associated protein 1-like 2 OS=Homo sapiens GN=AFAP1L2 - [AF1L2_HUMAN]	0	0	0	0	0	0	0	0.949037	0.316346	0.547927	0.211325
Q8N5D0-5	Isoform 5 of WD and tetratricopeptide repeats protein 1 OS=Homo sapiens GN=WDTC1 - [WDTC1_HUMAN]	0	0	0	0	0	0	0	0.949037	0.316346	0.547927	0.211325
Q8N5I4	Dehydrogenase/reductase SDR family member on chromosome X OS=Homo sapiens GN=DHRSX PE=2 SV=2 - [DHRSX_HUMAN]	0	0	0	0	0	1.95626	0	0	0.652086	1.12945	0.211325
Q8N5R6-4	Isoform 4 of Coiled-coil domain-containing protein 33 OS=Homo sapiens GN=CCDC33 - [CCD33_HUMAN]	0	0	0	0	0	0	0	0.949037	0.316346	0.547927	0.211325
Q8N6M3	Fat storage-inducing transmembrane protein 2 OS=Homo sapiens GN=FITM2 PE=2 SV=1 - [FITM2_HUMAN]	0	0	0	0	0	1.95626	0	0.949037	0.968432	0.978273	0.114274
Q8N6Q8	Methyltransferase-like protein 25 OS=Homo sapiens GN=METTL25 PE=2 SV=2 - [MET25_HUMAN]	0	0	0	0	0	0.978129	0	0	0.326043	0.564723	0.211325
Q8N801	Uncharacterized protein C2orf61 OS=Homo sapiens GN=C2orf61 PE=2 SV=1 - [CB061_HUMAN]	0	0	0	0	0	0	0.967055	0	0.322352	0.55833	0.211325
Q8N8S7-2	Isoform 2 of Protein enabled homolog OS=Homo sapiens GN=ENAH - [ENAH_HUMAN]	0	0	0	0	0	0.978129	1.93411	0	0.970747	0.967076	0.112116
Q8N9I0	Synaptotagmin-2 OS=Homo sapiens GN=SYT2 PE=1 SV=2 - [SYT2_HUMAN]	0	0	0	0	0	0	0.967055	0	0.322352	0.55833	0.211325
Q8N9N5-3	Isoform 3 of Protein BANP OS=Homo sapiens GN=BANP - [BANP_HUMAN]	0	0	0	0	0	0	0.967055	0	0.322352	0.55833	0.211325
Q8NA70	Protein FAM47B OS=Homo sapiens GN=FAM47B PE=2 SV=2 - [FA47B_HUMAN]	0	0	0	0	0	0.978129	0	0	0.326043	0.564723	0.211325
Q8NAV1	Pre-mRNA-splicing factor 38A OS=Homo sapiens GN=PRPF38A PE=1 SV=1 - [PR38A_HUMAN]	0	0	0	0	0	0.978129	0	0	0.326043	0.564723	0.211325
Q8NBI6-3	Isoform 3 of Xyloside xylosyltransferase 1 OS=Homo sapiens GN=XXYLT1 - [XXLT1_HUMAN]	0	0	0	0	0	0.978129	0	0	0.326043	0.564723	0.211325
Q8NBN3-2	Isoform 2 of Transmembrane protein 87A OS=Homo sapiens GN=TMEM87A - [TM87A_HUMAN]	0	0	0	0	0	0	0.967055	0	0.322352	0.55833	0.211325
Q8NC51-4	Isoform 4 of Plasminogen activator inhibitor 1 RNA-binding protein OS=Homo sapiens GN=SERBP1 - [PAIRB_HUMAN]	0	0	0	0	0	1.95626	2.90117	2.84711	2.56818	0.530627	0.00696668
Q8NCA5-2	Isoform 2 of Protein FAM98A OS=Homo sapiens GN=FAM98A - [FA98A_HUMAN]	0	0	0	0	0	0	0	4.74518	1.58173	2.73963	0.211325
Q8NCI6-4	Isoform 4 of Beta-galactosidase-1-like protein 3 OS=Homo sapiens GN=GLB1L3 - [GLBL3_HUMAN]	0	0	0	0	0	0.978129	0	0	0.326043	0.564723	0.211325
Q8NCM8	Cytoplasmic dynein 2 heavy chain 1 OS=Homo sapiens GN=DYNC2H1 PE=1 SV=4 - [DYHC2_HUMAN]	0	0	0	0	0	0	0.967055	0	0.322352	0.55833	0.211325
Q8ND04-3	Isoform 3 of Protein SMG8 OS=Homo sapiens GN=SMG8 - [SMG8_HUMAN]	0	0	0	0	0	0	0.967055	0	0.322352	0.55833	0.211325
Q8ND07	Coiled-coil domain-containing protein 176 OS=Homo sapiens GN=CCDC176 PE=2 SV=3 - [CC176_HUMAN]	0	0	0	0	0	0	0.967055	0	0.322352	0.55833	0.211325
Q8NDZ4	Deleted in autism protein 1 OS=Homo sapiens GN=C3orf58 PE=2 SV=1 - [DIA1_HUMAN]	0	0	0	0	0	0.978129	0	0.949037	0.642389	0.556515	0.0917982
Q8NE71-2	Isoform 2 of ATP-binding cassette sub-family F member 1 OS=Homo sapiens GN=ABCF1 - [ABCF1_HUMAN]	0	0	0	0	0	5.86877	5.80233	4.74518	5.4721	0.630401	0.00219738
Q8NEU8-2	Isoform 2 of DCC-interacting protein 13-beta OS=Homo sapiens GN=APPL2 - [DP13B_HUMAN]	0	0	0	0	0	0.978129	0	0	0.326043	0.564723	0.211325
Q8NF37	Lysophosphatidylcholine acyltransferase 1 OS=Homo sapiens GN=LPCAT1 PE=1 SV=2 - [PCAT1_HUMAN]	0	0	0	0	0	1.95626	0.967055	1.89807	1.60713	0.555083	0.0187697
Q8NFH3	Nucleoporin Nup43 OS=Homo sapiens GN=NUP43 PE=1 SV=1 - [NUP43_HUMAN]	0	0	0	0	0	2.93439	2.90117	2.84711	2.89422	0.044051	3.86052e-05
Q8NFX7	Syntaxin-binding protein 6 OS=Homo sapiens GN=STXBP6 PE=1 SV=2 - [STXB6_HUMAN]	0	0	0	0	0	0.978129	0	0	0.326043	0.564723	0.211325
Q8NGK6	Olfactory receptor 52I1 OS=Homo sapiens GN=OR52I1 PE=2 SV=2 - [O52I1_HUMAN]	0	0	0	0	0	0.978129	0	0	0.326043	0.564723	0.211325
Q8NGU9	Probable G-protein coupled receptor 150 OS=Homo sapiens GN=GPR150 PE=2 SV=1 - [GP150_HUMAN]	0	0	0	0	0	0	0	0.949037	0.316346	0.547927	0.211325
Q8NI08-7	Isoform 7 of Nuclear receptor coactivator 7 OS=Homo sapiens GN=NCOA7 - [NCOA7_HUMAN]	0	0	0	0	0	0	0	0.949037	0.316346	0.547927	0.211325
Q8NI37	Protein phosphatase PTC7 homolog OS=Homo sapiens GN=PPTC7 PE=2 SV=1 - [PPTC7_HUMAN]	0	0	0	0	0	0.978129	0	0	0.326043	0.564723	0.211325
Q8TAQ2	SWI/SNF complex subunit SMARCC2 OS=Homo sapiens GN=SMARCC2 PE=1 SV=1 - [SMRC2_HUMAN]	0	0	0	0	0	0	0	18.0317	6.01057	10.4106	0.211325
Q8TC57-2	Isoform 2 of Meiosis 1 arrest protein OS=Homo sapiens GN=M1AP - [M1AP_HUMAN]	0	0	0	0	0	0	0	0.949037	0.316346	0.547927	0.211325
Q8TCJ2	Dolichyl-diphosphooligosaccharide--protein glycosyltransferase subunit STT3B OS=Homo sapiens GN=STT3B PE=1 SV=1 - [STT3B_HUMAN]	0	0	0	0	0	0	1.93411	0.949037	0.961049	0.967111	0.113678
Q8TCY5-2	Isoform 2 of Melanocortin-2 receptor accessory protein OS=Homo sapiens GN=MRAP - [MRAP_HUMAN]	0	0	0	0	0	0.978129	0	0	0.326043	0.564723	0.211325
Q8TD35	Uncharacterized protein C20orf201 OS=Homo sapiens GN=C20orf201 PE=2 SV=3 - [CT201_HUMAN]	0	0	0	0	0	0.978129	0.967055	0	0.648395	0.561554	0.0917583
Q8TD55-2	Isoform 2 of Pleckstrin homology domain-containing family O member 2 OS=Homo sapiens GN=PLEKHO2 - [PKHO2_HUMAN]	0	0	0	0	0	0	0	0.949037	0.316346	0.547927	0.211325
Q8TDB4	Protein MGARP OS=Homo sapiens GN=MGARP PE=1 SV=1 - [HUMMR_HUMAN]	0	0	0	0	0	2.93439	1.93411	2.84711	2.57187	0.554036	0.00755946
Q8TDB6	E3 ubiquitin-protein ligase DTX3L OS=Homo sapiens GN=DTX3L PE=1 SV=1 - [DTX3L_HUMAN]	0	0	0	0	0	0.978129	0	0	0.326043	0.564723	0.211325
Q8TDH9-2	Isoform 2 of Biogenesis of lysosome-related organelles complex 1 subunit 5 OS=Homo sapiens GN=BLOC1S5 - [BL1S5_HUMAN]	0	0	0	0	0	0.978129	0.967055	0	0.648395	0.561554	0.0917583
Q8TDJ6-2	Isoform 2 of DmX-like protein 2 OS=Homo sapiens GN=DMXL2 - [DMXL2_HUMAN]	0	0	0	0	0	0	0	0.949037	0.316346	0.547927	0.211325
Q8TDL5-2	Isoform 2 of BPI fold-containing family B member 1 OS=Homo sapiens GN=BPIFB1 - [BPIB1_HUMAN]	0	0	0	0	0	0.978129	0	0.949037	0.642389	0.556515	0.0917982
Q8TDQ1-5	Isoform 5 of CMRF35-like molecule 1 OS=Homo sapiens GN=CD300LF - [CLM1_HUMAN]	0	0	0	0	0	0	0.967055	0	0.322352	0.55833	0.211325
Q8TDQ7-3	Isoform 3 of Glucosamine-6-phosphate isomerase 2 OS=Homo sapiens GN=GNPDA2 - [GNPI2_HUMAN]	0	0	0	0	0	0	0	1.89807	0.632691	1.09585	0.211325
Q8TDV5	Glucose-dependent insulinotropic receptor OS=Homo sapiens GN=GPR119 PE=1 SV=1 - [GP119_HUMAN]	0	0	0	0	0	0	0.967055	0	0.322352	0.55833	0.211325
Q8TDX9-2	Isoform 2 of Polycystic kidney disease protein 1-like 1 OS=Homo sapiens GN=PKD1L1 - [PK1L1_HUMAN]	0	0	0	0	0	0	0.967055	0	0.322352	0.55833	0.211325
Q8TDY2-2	Isoform 2 of RB1-inducible coiled-coil protein 1 OS=Homo sapiens GN=RB1CC1 - [RBCC1_HUMAN]	0	0	0	0	0	0.978129	0.967055	0	0.648395	0.561554	0.0917583
Q8TE57	A disintegrin and metalloproteinase with thrombospondin motifs 16 OS=Homo sapiens GN=ADAMTS16 PE=2 SV=3 - [ATS16_HUMAN]	0	0	0	0	0	2.93439	0	0	0.978129	1.69417	0.211325
Q8TE76-2	Isoform 2 of MORC family CW-type zinc finger protein 4 OS=Homo sapiens GN=MORC4 - [MORC4_HUMAN]	0	0	0	0	0	0	0	0.949037	0.316346	0.547927	0.211325
Q8TE77-3	Isoform 3 of Protein phosphatase Slingshot homolog 3 OS=Homo sapiens GN=SSH3 - [SSH3_HUMAN]	0	0	0	0	0	0	0.967055	0	0.322352	0.55833	0.211325
Q8TE85-4	Isoform 4 of Grainyhead-like protein 3 homolog OS=Homo sapiens GN=GRHL3 - [GRHL3_HUMAN]	0	0	0	0	0	0.978129	0.967055	0	0.648395	0.561554	0.0917583
Q8TEU7-6	Isoform 6 of Rap guanine nucleotide exchange factor 6 OS=Homo sapiens GN=RAPGEF6 - [RPGF6_HUMAN]	0	0	0	0	0	0.978129	0	0	0.326043	0.564723	0.211325
Q8TEW0-5	Isoform 5 of Partitioning defective 3 homolog OS=Homo sapiens GN=PARD3 - [PARD3_HUMAN]	0	0	0	0	0	0	0.967055	0	0.322352	0.55833	0.211325
Q8TEX9	Importin-4 OS=Homo sapiens GN=IPO4 PE=1 SV=2 - [IPO4_HUMAN]	0	0	0	0	0	1.95626	0	2.84711	1.60112	1.4564	0.0985969
Q8TF20	Zinc finger protein 721 OS=Homo sapiens GN=ZNF721 PE=2 SV=2 - [ZN721_HUMAN]	0	0	0	0	0	0	0.967055	0	0.322352	0.55833	0.211325
Q8WUA7-2	Isoform 2 of TBC1 domain family member 22A OS=Homo sapiens GN=TBC1D22A - [TB22A_HUMAN]	0	0	0	0	0	0	0	0.949037	0.316346	0.547927	0.211325
Q8WUB8-3	Isoform 3 of PHD finger protein 10 OS=Homo sapiens GN=PHF10 - [PHF10_HUMAN]	0	0	0	0	0	0.978129	0	0	0.326043	0.564723	0.211325
Q8WUF8-2	Isoform 2 of Protein FAM172A OS=Homo sapiens GN=FAM172A - [F172A_HUMAN]	0	0	0	0	0	0.978129	0	0	0.326043	0.564723	0.211325
Q8WUK0-2	Isoform 2 of Phosphatidylglycerophosphatase and protein-tyrosine phosphatase 1 OS=Homo sapiens GN=PTPMT1 - [PTPM1_HUMAN]	0	0	0	0	0	0	0.967055	0	0.322352	0.55833	0.211325
Q8WUP2-3	Isoform 3 of Filamin-binding LIM protein 1 OS=Homo sapiens GN=FBLIM1 - [FBLI1_HUMAN]	0	0	0	0	0	0	2.90117	0	0.967055	1.67499	0.211325
Q8WUZ0	B-cell CLL/lymphoma 7 protein family member C OS=Homo sapiens GN=BCL7C PE=1 SV=3 - [BCL7C_HUMAN]	0	0	0	0	0	0.978129	0.967055	0	0.648395	0.561554	0.0917583
Q8WV41	Sorting nexin-33 OS=Homo sapiens GN=SNX33 PE=1 SV=1 - [SNX33_HUMAN]	0	0	0	0	0	1.95626	0	1.89807	1.28478	1.11303	0.0917982
Q8WV83-2	Isoform 2 of Solute carrier family 35 member F5 OS=Homo sapiens GN=SLC35F5 - [S35F5_HUMAN]	0	0	0	0	0	0.978129	0	0.949037	0.642389	0.556515	0.0917982
Q8WVB3	Hexosaminidase D OS=Homo sapiens GN=HEXDC PE=2 SV=3 - [HEXDC_HUMAN]	0	0	0	0	0	0.978129	0	0	0.326043	0.564723	0.211325
Q8WVC6-2	Isoform 2 of Dephospho-CoA kinase domain-containing protein OS=Homo sapiens GN=DCAKD - [DCAKD_HUMAN]	0	0	0	0	0	0	0.967055	0	0.322352	0.55833	0.211325
Q8WVP5	Tumor necrosis factor alpha-induced protein 8-like protein 1 OS=Homo sapiens GN=TNFAIP8L1 PE=2 SV=2 - [TP8L1_HUMAN]	0	0	0	0	0	0.978129	0.967055	0	0.648395	0.561554	0.0917583
Q8WVQ1-2	Isoform 2 of Soluble calcium-activated nucleotidase 1 OS=Homo sapiens GN=CANT1 - [CANT1_HUMAN]	0	0	0	0	0	0.978129	1.93411	2.84711	1.91978	0.934573	0.035359
Q8WW12-2	Isoform 2 of PEST proteolytic signal-containing nuclear protein OS=Homo sapiens GN=PCNP - [PCNP_HUMAN]	0	0	0	0	0	0	0.967055	0.949037	0.638697	0.553201	0.0917698
Q8WWQ0	PH-interacting protein OS=Homo sapiens GN=PHIP PE=1 SV=2 - [PHIP_HUMAN]	0	0	0	0	0	0.978129	0	1.89807	0.958734	0.949185	0.111157
Q8WXF7-2	Isoform 2 of Atlastin-1 OS=Homo sapiens GN=ATL1 - [ATLA1_HUMAN]	0	0	0	0	0	1.95626	1.93411	0.949037	1.61314	0.575233	0.0199343
Q8WXG6-6	Isoform 6 of MAP kinase-activating death domain protein OS=Homo sapiens GN=MADD - [MADD_HUMAN]	0	0	0	0	0	0	0.967055	0	0.322352	0.55833	0.211325
Q8WXH0	Nesprin-2 OS=Homo sapiens GN=SYNE2 PE=1 SV=3 - [SYNE2_HUMAN]	0	0	0	0	0	43.0377	0	0	14.3459	24.8478	0.211325
Q8WXX5	DnaJ homolog subfamily C member 9 OS=Homo sapiens GN=DNAJC9 PE=1 SV=1 - [DNJC9_HUMAN]	0	0	0	0	0	3.91252	0.967055	0.949037	1.94287	1.70579	0.0936291
Q8WY98	Transmembrane protein 234 OS=Homo sapiens GN=TMEM234 PE=2 SV=1 - [TM234_HUMAN]	0	0	0	0	0	0	0	0.949037	0.316346	0.547927	0.211325
Q92504	Zinc transporter SLC39A7 OS=Homo sapiens GN=SLC39A7 PE=1 SV=2 - [S39A7_HUMAN]	0	0	0	0	0	0	0.967055	0	0.322352	0.55833	0.211325
Q92540-5	Isoform 5 of Protein SMG7 OS=Homo sapiens GN=SMG7 - [SMG7_HUMAN]	0	0	0	0	0	0	0.967055	0	0.322352	0.55833	0.211325
Q92618	Zinc finger protein 516 OS=Homo sapiens GN=ZNF516 PE=2 SV=1 - [ZN516_HUMAN]	0	0	0	0	0	0	0	0.949037	0.316346	0.547927	0.211325
Q92643	GPI-anchor transamidase OS=Homo sapiens GN=PIGK PE=1 SV=2 - [GPI8_HUMAN]	0	0	0	0	0	0	4.83528	0	1.61176	2.79165	0.211325
Q92729-3	Isoform 3 of Receptor-type tyrosine-protein phosphatase U OS=Homo sapiens GN=PTPRU - [PTPRU_HUMAN]	0	0	0	0	0	0	0	1.89807	0.632691	1.09585	0.211325
Q92743	Serine protease HTRA1 OS=Homo sapiens GN=HTRA1 PE=1 SV=1 - [HTRA1_HUMAN]	0	0	0	0	0	4.89065	0.967055	1.89807	2.58526	2.05007	0.0802938
Q92830-2	Isoform 2 of Histone acetyltransferase KAT2A OS=Homo sapiens GN=KAT2A - [KAT2A_HUMAN]	0	0	0	0	0	0.978129	0	0	0.326043	0.564723	0.211325
Q92843-2	Isoform 3 of Bcl-2-like protein 2 OS=Homo sapiens GN=BCL2L2 - [B2CL2_HUMAN]	0	0	0	0	0	2.93439	0	5.69422	2.8762	2.84756	0.111157
Q92890	Ubiquitin fusion degradation protein 1 homolog OS=Homo sapiens GN=UFD1L PE=1 SV=3 - [UFD1_HUMAN]	0	0	0	0	0	5.86877	0	0	1.95626	3.38834	0.211325
Q92974-3	Isoform 3 of Rho guanine nucleotide exchange factor 2 OS=Homo sapiens GN=ARHGEF2 - [ARHG2_HUMAN]	0	0	0	0	0	1.95626	1.93411	1.89807	1.92948	0.0293673	3.86052e-05
Q93033	Immunoglobulin superfamily member 2 OS=Homo sapiens GN=CD101 PE=1 SV=2 - [IGSF2_HUMAN]	0	0	0	0	0	0	0	0.949037	0.316346	0.547927	0.211325
Q93084-4	Isoform SERCA3G of Sarcoplasmic/endoplasmic reticulum calcium ATPase 3 OS=Homo sapiens GN=ATP2A3 - [AT2A3_HUMAN]	0	0	0	0	0	0.978129	0	0.949037	0.642389	0.556515	0.0917982
Q93100-2	Isoform 2 of Phosphorylase b kinase regulatory subunit beta OS=Homo sapiens GN=PHKB - [KPBB_HUMAN]	0	0	0	0	0	0	0	0.949037	0.316346	0.547927	0.211325
Q969F0	Fetal and adult testis-expressed transcript protein OS=Homo sapiens GN=FATE1 PE=2 SV=1 - [FATE1_HUMAN]	0	0	0	0	0	0.978129	0	0	0.326043	0.564723	0.211325
Q969Q0	60S ribosomal protein L36a-like OS=Homo sapiens GN=RPL36AL PE=1 SV=3 - [RL36L_HUMAN]	0	0	0	0	0	0	0	0.949037	0.316346	0.547927	0.211325
Q969V3-2	Isoform 2 of Nicalin OS=Homo sapiens GN=NCLN - [NCLN_HUMAN]	0	0	0	0	0	4.89065	4.83528	6.64326	5.45639	1.02823	0.0058155
Q969Z3-2	Isoform 2 of MOSC domain-containing protein 2, mitochondrial OS=Homo sapiens GN=MARC2 - [MOSC2_HUMAN]	0	0	0	0	0	7.82503	0	0	2.60834	4.51778	0.211325
Q96A08	Histone H2B type 1-A OS=Homo sapiens GN=HIST1H2BA PE=1 SV=3 - [H2B1A_HUMAN]	0	0	0	0	0	0	0	27.5221	9.17402	15.8899	0.211325
Q96A49	Synapse-associated protein 1 OS=Homo sapiens GN=SYAP1 PE=1 SV=1 - [SYAP1_HUMAN]	0	0	0	0	0	0	0.967055	0.949037	0.638697	0.553201	0.0917698
Q96AN5-3	Isoform 3 of Transmembrane protein 143 OS=Homo sapiens GN=TMEM143 - [TM143_HUMAN]	0	0	0	0	0	0.978129	0	0	0.326043	0.564723	0.211325
Q96AP7	Endothelial cell-selective adhesion molecule OS=Homo sapiens GN=ESAM PE=1 SV=1 - [ESAM_HUMAN]	0	0	0	0	0	3.91252	2.90117	2.84711	3.22026	0.600117	0.00568951
Q96AY3	Peptidyl-prolyl cis-trans isomerase FKBP10 OS=Homo sapiens GN=FKBP10 PE=1 SV=1 - [FKB10_HUMAN]	0	0	0	0	0	5.86877	6.76939	5.69422	6.11079	0.576998	0.00147935
Q96B13	Protein phosphatase 2, regulatory subunit B', gamma isoform OS=Homo sapiens GN=PPP2R5C PE=2 SV=1 - [Q96B13_HUMAN]	0	0	0	0	0	0	0	2.84711	0.949037	1.64378	0.211325
Q96B45	UPF0693 protein C10orf32 OS=Homo sapiens GN=C10orf32 PE=1 SV=1 - [CJ032_HUMAN]	0	0	0	0	0	0.978129	0	0.949037	0.642389	0.556515	0.0917982
Q96BW9	Mitochondrial translocator assembly and maintenance protein 41 homolog OS=Homo sapiens GN=TAMM41 PE=2 SV=1 - [TAM41_HUMAN]	0	0	0	0	0	0.978129	0	0	0.326043	0.564723	0.211325
Q96BZ9	TBC1 domain family member 20 OS=Homo sapiens GN=TBC1D20 PE=1 SV=1 - [TBC20_HUMAN]	0	0	0	0	0	0.978129	0.967055	0	0.648395	0.561554	0.0917583
Q96C03	Mitochondrial dynamic protein MID49 OS=Homo sapiens GN=SMCR7 PE=1 SV=1 - [MID49_HUMAN]	0	0	0	0	0	0	0.967055	0	0.322352	0.55833	0.211325
Q96C10	Probable ATP-dependent RNA helicase DHX58 OS=Homo sapiens GN=DHX58 PE=1 SV=1 - [DHX58_HUMAN]	0	0	0	0	0	0.978129	0	0	0.326043	0.564723	0.211325
Q96C19	EF-hand domain-containing protein D2 OS=Homo sapiens GN=EFHD2 PE=1 SV=1 - [EFHD2_HUMAN]	0	0	0	0	0	12.7157	18.3741	17.0827	16.0575	2.96523	0.00558833
Q96C45	Serine/threonine-protein kinase ULK4 OS=Homo sapiens GN=ULK4 PE=1 SV=2 - [ULK4_HUMAN]	0	0	0	0	0	0	0.967055	0.949037	0.638697	0.553201	0.0917698
Q96C90	Protein phosphatase 1 regulatory subunit 14B OS=Homo sapiens GN=PPP1R14B PE=1 SV=3 - [PP14B_HUMAN]	0	0	0	0	0	0.978129	0.967055	0.949037	0.96474	0.0146837	3.86052e-05
Q96CG8-3	Isoform 3 of Collagen triple helix repeat-containing protein 1 OS=Homo sapiens GN=CTHRC1 - [CTHR1_HUMAN]	0	0	0	0	0	1.95626	3.86822	3.79615	3.20688	1.08367	0.0180096
Q96CW5-3	Isoform 3 of Gamma-tubulin complex component 3 OS=Homo sapiens GN=TUBGCP3 - [GCP3_HUMAN]	0	0	0	0	0	0.978129	0	0	0.326043	0.564723	0.211325
Q96D09	G-protein coupled receptor-associated sorting protein 2 OS=Homo sapiens GN=GPRASP2 PE=1 SV=1 - [GASP2_HUMAN]	0	0	0	0	0	0	0	0.949037	0.316346	0.547927	0.211325
Q96DC7	Transmembrane and coiled-coil domain-containing protein 6 OS=Homo sapiens GN=TMCO6 PE=2 SV=2 - [TMCO6_HUMAN]	0	0	0	0	0	0.978129	0	0	0.326043	0.564723	0.211325
Q96DI7	U5 small nuclear ribonucleoprotein 40 kDa protein OS=Homo sapiens GN=SNRNP40 PE=1 SV=1 - [SNR40_HUMAN]	0	0	0	0	0	1.95626	2.90117	2.84711	2.56818	0.530627	0.00696668
Q96DY2-3	Isoform 3 of IQ domain-containing protein D OS=Homo sapiens GN=IQCD - [IQCD_HUMAN]	0	0	0	0	0	0	0	0.949037	0.316346	0.547927	0.211325
Q96E35	Zinc finger MYND domain-containing protein 19 OS=Homo sapiens GN=ZMYND19 PE=1 SV=1 - [ZMY19_HUMAN]	0	0	0	0	0	0	0	0.949037	0.316346	0.547927	0.211325
Q96E39	RNA binding motif protein, X-linked-like-1 OS=Homo sapiens GN=RBMXL1 PE=1 SV=1 - [RMXL1_HUMAN]	0	0	0	0	0	17.6063	0	0	5.86877	10.165	0.211325
Q96E92	5'-AMP-activated protein kinase catalytic subunit alpha-1 OS=Homo sapiens GN=PRKAA1 PE=2 SV=1 - [Q96E92_HUMAN]	0	0	0	0	0	0	2.90117	0	0.967055	1.67499	0.211325
Q96EA0	BET1 homolog OS=Homo sapiens GN=BET1 PE=4 SV=1 - [Q96EA0_HUMAN]	0	0	0	0	0	0.978129	0	1.89807	0.958734	0.949185	0.111157
Q96EK5	KIF1-binding protein OS=Homo sapiens GN=KIAA1279 PE=1 SV=1 - [KBP_HUMAN]	0	0	0	0	0	0	0.967055	0	0.322352	0.55833	0.211325
Q96EN8	Molybdenum cofactor sulfurase OS=Homo sapiens GN=MOCOS PE=1 SV=2 - [MOCOS_HUMAN]	0	0	0	0	0	0	0.967055	0	0.322352	0.55833	0.211325
Q96GC5	39S ribosomal protein L48, mitochondrial OS=Homo sapiens GN=MRPL48 PE=1 SV=2 - [RM48_HUMAN]	0	0	0	0	0	0	0	6.64326	2.21442	3.83549	0.211325
Q96GS4	Uncharacterized protein C17orf59 OS=Homo sapiens GN=C17orf59 PE=1 SV=2 - [CQ059_HUMAN]	0	0	0	0	0	0	0	0.949037	0.316346	0.547927	0.211325
Q96H20	Vacuolar-sorting protein SNF8 OS=Homo sapiens GN=SNF8 PE=1 SV=1 - [SNF8_HUMAN]	0	0	0	0	0	0	0	7.59229	2.53076	4.38341	0.211325
Q96H79	Zinc finger CCCH-type antiviral protein 1-like OS=Homo sapiens GN=ZC3HAV1L PE=1 SV=2 - [ZCCHL_HUMAN]	0	0	0	0	0	0	0.967055	0.949037	0.638697	0.553201	0.0917698
Q96HS1-2	Isoform 2 of Serine/threonine-protein phosphatase PGAM5, mitochondrial OS=Homo sapiens GN=PGAM5 - [PGAM5_HUMAN]	0	0	0	0	0	5.86877	6.76939	3.79615	5.4781	1.52463	0.0124304
Q96I24	Far upstream element-binding protein 3 OS=Homo sapiens GN=FUBP3 PE=1 SV=2 - [FUBP3_HUMAN]	0	0	0	0	0	0	3.86822	1.89807	1.9221	1.93422	0.113678
Q96IC2-2	Isoform 2 of Putative RNA exonuclease NEF-sp OS=Homo sapiens GN=44M2.3 - [REXON_HUMAN]	0	0	0	0	0	0.978129	0.967055	0.949037	0.96474	0.0146837	3.86052e-05
Q96IG2-2	Isoform 2 of F-box/LRR-repeat protein 20 OS=Homo sapiens GN=FBXL20 - [FXL20_HUMAN]	0	0	0	0	0	0.978129	1.93411	0	0.970747	0.967076	0.112116
Q96J85	C-Mpl binding protein OS=Homo sapiens GN=LARP4 PE=2 SV=1 - [Q96J85_HUMAN]	0	0	0	0	0	0.978129	0	0	0.326043	0.564723	0.211325
Q96JM2-2	Isoform 2 of Zinc finger protein 462 OS=Homo sapiens GN=ZNF462 - [ZN462_HUMAN]	0	0	0	0	0	0	0.967055	0	0.322352	0.55833	0.211325
Q96K17-2	Isoform 2 of Transcription factor BTF3 homolog 4 OS=Homo sapiens GN=BTF3L4 - [BT3L4_HUMAN]	0	0	0	0	0	0	0.967055	0	0.322352	0.55833	0.211325
Q96K19	E3 ubiquitin-protein ligase RNF170 OS=Homo sapiens GN=RNF170 PE=1 SV=2 - [RN170_HUMAN]	0	0	0	0	0	8.80316	7.73644	5.69422	7.41127	1.57977	0.00740491
Q96KJ9	Cytochrome c oxidase subunit 4 isoform 2, mitochondrial OS=Homo sapiens GN=COX4I2 PE=1 SV=2 - [COX42_HUMAN]	0	0	0	0	0	0	0.967055	0.949037	0.638697	0.553201	0.0917698
Q96L58	Beta-1,3-galactosyltransferase 6 OS=Homo sapiens GN=B3GALT6 PE=2 SV=2 - [B3GT6_HUMAN]	0	0	0	0	0	0	0.967055	0	0.322352	0.55833	0.211325
Q96LP0	HCG2032453 OS=Homo sapiens GN=hCG_2032453 PE=2 SV=1 - [Q96LP0_HUMAN]	0	0	0	0	0	0	0.967055	0	0.322352	0.55833	0.211325
Q96MG8	Protein-L-isoaspartate O-methyltransferase domain-containing protein 1 OS=Homo sapiens GN=PCMTD1 PE=2 SV=2 - [PCMD1_HUMAN]	0	0	0	0	0	2.93439	0	0	0.978129	1.69417	0.211325
Q96MH6	Transmembrane protein 68 OS=Homo sapiens GN=TMEM68 PE=2 SV=2 - [TMM68_HUMAN]	0	0	0	0	0	1.95626	2.90117	0	1.61914	1.47967	0.0992635
Q96MS0-2	Isoform 2 of Roundabout homolog 3 OS=Homo sapiens GN=ROBO3 - [ROBO3_HUMAN]	0	0	0	0	0	0	0.967055	0	0.322352	0.55833	0.211325
Q96MV1	Transmembrane protein 56 OS=Homo sapiens GN=TMEM56 PE=1 SV=1 - [TMM56_HUMAN]	0	0	0	0	0	0	0	0.949037	0.316346	0.547927	0.211325
Q96MY7	Protein FAM161B OS=Homo sapiens GN=FAM161B PE=1 SV=2 - [F161B_HUMAN]	0	0	0	0	0	0	0	1.89807	0.632691	1.09585	0.211325
Q96N06	Uncharacterized protein C16orf55 OS=Homo sapiens GN=C16orf55 PE=2 SV=1 - [CP055_HUMAN]	0	0	0	0	0	0	0	0.949037	0.316346	0.547927	0.211325
Q96N16-6	Isoform 6 of Janus kinase and microtubule-interacting protein 1 OS=Homo sapiens GN=JAKMIP1 - [JKIP1_HUMAN]	0	0	0	0	0	0	0	0.949037	0.316346	0.547927	0.211325
Q96N21-2	Isoform 2 of AP-4 complex accessory subunit tepsin OS=Homo sapiens GN=ENTHD2 - [AP4AT_HUMAN]	0	0	0	0	0	0	0	0.949037	0.316346	0.547927	0.211325
Q96NJ6	Zinc finger protein 3 homolog OS=Homo sapiens GN=ZFP3 PE=2 SV=1 - [ZFP3_HUMAN]	0	0	0	0	0	0	0	0.949037	0.316346	0.547927	0.211325
Q96PE2	Rho guanine nucleotide exchange factor 17 OS=Homo sapiens GN=ARHGEF17 PE=1 SV=1 - [ARHGH_HUMAN]	0	0	0	0	0	1.95626	1.93411	0	1.29679	1.12311	0.0917583
Q96PK6	RNA-binding protein 14 OS=Homo sapiens GN=RBM14 PE=1 SV=2 - [RBM14_HUMAN]	0	0	0	0	0	0.978129	0	0	0.326043	0.564723	0.211325
Q96PP9	Guanylate-binding protein 4 OS=Homo sapiens GN=GBP4 PE=1 SV=2 - [GBP4_HUMAN]	0	0	0	0	0	0	0.967055	0	0.322352	0.55833	0.211325
Q96PY5	Formin-like protein 2 OS=Homo sapiens GN=FMNL2 PE=1 SV=3 - [FMNL2_HUMAN]	0	0	0	0	0	1.95626	0	0	0.652086	1.12945	0.211325
Q96PZ7-4	Isoform 4 of CUB and sushi domain-containing protein 1 OS=Homo sapiens GN=CSMD1 - [CSMD1_HUMAN]	0	0	0	0	0	0	0.967055	0	0.322352	0.55833	0.211325
Q96Q89-4	Isoform 4 of Kinesin-like protein KIF20B OS=Homo sapiens GN=KIF20B - [KI20B_HUMAN]	0	0	0	0	0	0.978129	0	0	0.326043	0.564723	0.211325
Q96QU6	1-aminocyclopropane-1-carboxylate synthase-like protein 1 OS=Homo sapiens GN=ACCS PE=2 SV=1 - [1A1L1_HUMAN]	0	0	0	0	0	0	0.967055	0	0.322352	0.55833	0.211325
Q96R47	Olfactory receptor 2A14 OS=Homo sapiens GN=OR2A14 PE=2 SV=4 - [O2A14_HUMAN]	0	0	0	0	0	0	0.967055	0	0.322352	0.55833	0.211325
Q96RQ9	L-amino-acid oxidase OS=Homo sapiens GN=IL4I1 PE=1 SV=1 - [OXLA_HUMAN]	0	0	0	0	0	3.91252	2.90117	3.79615	3.53661	0.553378	0.00403126
Q96RU3-4	Isoform 4 of Formin-binding protein 1 OS=Homo sapiens GN=FNBP1 - [FNBP1_HUMAN]	0	0	0	0	0	0	0	0.949037	0.316346	0.547927	0.211325
Q96RW7-2	Isoform 2 of Hemicentin-1 OS=Homo sapiens GN=HMCN1 - [HMCN1_HUMAN]	0	0	0	0	0	0	0	0.949037	0.316346	0.547927	0.211325
Q96SB3	Neurabin-2 OS=Homo sapiens GN=PPP1R9B PE=1 SV=2 - [NEB2_HUMAN]	0	0	0	0	0	4.89065	2.90117	3.79615	3.86265	0.996406	0.0107346
Q96T51-3	Isoform 3 of RUN and FYVE domain-containing protein 1 OS=Homo sapiens GN=RUFY1 - [RUFY1_HUMAN]	0	0	0	0	0	2.93439	0.967055	0.949037	1.61683	1.14108	0.0667798
Q96T66-2	Isoform 2 of Nicotinamide mononucleotide adenylyltransferase 3 OS=Homo sapiens GN=NMNAT3 - [NMNA3_HUMAN]	0	0	0	0	0	1.95626	0	0	0.652086	1.12945	0.211325
Q99417	C-Myc-binding protein OS=Homo sapiens GN=MYCBP PE=1 SV=3 - [MYCBP_HUMAN]	0	0	0	0	0	0.978129	1.93411	1.89807	1.60344	0.541833	0.0180096
Q99466-2	Isoform 2 of Neurogenic locus notch homolog protein 4 OS=Homo sapiens GN=NOTCH4 - [NOTC4_HUMAN]	0	0	0	0	0	0.978129	0	0	0.326043	0.564723	0.211325
Q99467	CD180 antigen OS=Homo sapiens GN=CD180 PE=1 SV=2 - [CD180_HUMAN]	0	0	0	0	0	0.978129	0.967055	0	0.648395	0.561554	0.0917583
Q99525	Histone H4-like protein type G OS=Homo sapiens GN=HIST1H4G PE=2 SV=1 - [H4G_HUMAN]	0	0	0	0	0	0.978129	0	0	0.326043	0.564723	0.211325
Q99541	Perilipin-2 OS=Homo sapiens GN=PLIN2 PE=1 SV=2 - [PLIN2_HUMAN]	0	0	0	0	0	39.1252	37.7152	40.8086	39.2163	1.54872	0.000259732
Q99578-2	Isoform 2 of GTP-binding protein Rit2 OS=Homo sapiens GN=RIT2 - [RIT2_HUMAN]	0	0	0	0	0	0.978129	0	0.949037	0.642389	0.556515	0.0917982
Q99583	Max-binding protein MNT OS=Homo sapiens GN=MNT PE=2 SV=1 - [MNT_HUMAN]	0	0	0	0	0	0	0	0.949037	0.316346	0.547927	0.211325
Q99674-4	Isoform 4 of Cell growth regulator with EF hand domain protein 1 OS=Homo sapiens GN=CGREF1 - [CGRE1_HUMAN]	0	0	0	0	0	0.978129	0.967055	0.949037	0.96474	0.0146837	3.86052e-05
Q99767-2	Isoform 2 of Amyloid beta A4 precursor protein-binding family A member 2 OS=Homo sapiens GN=APBA2 - [APBA2_HUMAN]	0	0	0	0	0	0	0.967055	0	0.322352	0.55833	0.211325
Q9BPX6-2	Isoform 2 of Calcium uptake protein 1, mitochondrial OS=Homo sapiens GN=MICU1 - [MICU1_HUMAN]	0	0	0	0	0	0.978129	0.967055	0.949037	0.96474	0.0146837	3.86052e-05
Q9BQI7	PH and SEC7 domain-containing protein 2 OS=Homo sapiens GN=PSD2 PE=2 SV=3 - [PSD2_HUMAN]	0	0	0	0	0	1.95626	0	0.949037	0.968432	0.978273	0.114274
Q9BR39	Junctophilin-2 OS=Homo sapiens GN=JPH2 PE=1 SV=2 - [JPH2_HUMAN]	0	0	0	0	0	0	0.967055	0	0.322352	0.55833	0.211325
Q9BRF8-2	Isoform 2 of Calcineurin-like phosphoesterase domain-containing protein 1 OS=Homo sapiens GN=CPPED1 - [CPPED_HUMAN]	0	0	0	0	0	0	0	2.84711	0.949037	1.64378	0.211325
Q9BRR6-2	Isoform 2 of ADP-dependent glucokinase OS=Homo sapiens GN=ADPGK - [ADPGK_HUMAN]	0	0	0	0	0	2.93439	3.86822	3.79615	3.53292	0.519595	0.00356652
Q9BRS2	Serine/threonine-protein kinase RIO1 OS=Homo sapiens GN=RIOK1 PE=1 SV=2 - [RIOK1_HUMAN]	0	0	0	0	0	0	0	0.949037	0.316346	0.547927	0.211325
Q9BRT8-4	Isoform 4 of COBW domain-containing protein 1 OS=Homo sapiens GN=CBWD1 - [CBWD1_HUMAN]	0	0	0	0	0	0	0.967055	0	0.322352	0.55833	0.211325
Q9BT78-2	Isoform 2 of COP9 signalosome complex subunit 4 OS=Homo sapiens GN=COPS4 - [CSN4_HUMAN]	0	0	0	0	0	0	6.76939	0	2.25646	3.90831	0.211325
Q9BTU6	Phosphatidylinositol 4-kinase type 2-alpha OS=Homo sapiens GN=PI4K2A PE=1 SV=1 - [P4K2A_HUMAN]	0	0	0	0	0	0	5.80233	6.64326	4.14853	3.61725	0.0926804
Q9BU02-2	Isoform 2 of Thiamine-triphosphatase OS=Homo sapiens GN=THTPA - [THTPA_HUMAN]	0	0	0	0	0	0	0	0.949037	0.316346	0.547927	0.211325
Q9BU79	Transmembrane protein 243 OS=Homo sapiens GN=TMEM243 PE=2 SV=1 - [TM243_HUMAN]	0	0	0	0	0	0.978129	0.967055	0	0.648395	0.561554	0.0917583
Q9BUP3-2	Isoform 2 of Oxidoreductase HTATIP2 OS=Homo sapiens GN=HTATIP2 - [HTAI2_HUMAN]	0	0	0	0	0	0	2.90117	2.84711	1.91609	1.6596	0.0917698
Q9BUQ8	Probable ATP-dependent RNA helicase DDX23 OS=Homo sapiens GN=DDX23 PE=1 SV=3 - [DDX23_HUMAN]	0	0	0	0	0	0	3.86822	2.84711	2.23844	2.00465	0.096391
Q9BVJ6-2	Isoform 2 of U3 small nucleolar RNA-associated protein 14 homolog A OS=Homo sapiens GN=UTP14A - [UT14A_HUMAN]	0	0	0	0	0	0	0.967055	0	0.322352	0.55833	0.211325
Q9BVJ6-3	Isoform 3 of U3 small nucleolar RNA-associated protein 14 homolog A OS=Homo sapiens GN=UTP14A - [UT14A_HUMAN]	0	0	0	0	0	0	0	1.89807	0.632691	1.09585	0.211325
Q9BVM2	Protein DPCD OS=Homo sapiens GN=DPCD PE=1 SV=2 - [DPCD_HUMAN]	0	0	0	0	0	0.978129	2.90117	1.89807	1.92579	0.961818	0.037016
Q9BVP2-2	Isoform 2 of Guanine nucleotide-binding protein-like 3 OS=Homo sapiens GN=GNL3 - [GNL3_HUMAN]	0	0	0	0	0	0.978129	0	0.949037	0.642389	0.556515	0.0917982
Q9BW30	Tubulin polymerization-promoting protein family member 3 OS=Homo sapiens GN=TPPP3 PE=1 SV=1 - [TPPP3_HUMAN]	0	0	0	0	0	0	0.967055	0	0.322352	0.55833	0.211325
Q9BWF3	RNA-binding protein 4 OS=Homo sapiens GN=RBM4 PE=1 SV=1 - [RBM4_HUMAN]	0	0	0	0	0	0	0	1.89807	0.632691	1.09585	0.211325
Q9BWF3-4	Isoform 4 of RNA-binding protein 4 OS=Homo sapiens GN=RBM4 - [RBM4_HUMAN]	0	0	0	0	0	2.93439	0	0	0.978129	1.69417	0.211325
Q9BWJ5	Splicing factor 3B subunit 5 OS=Homo sapiens GN=SF3B5 PE=1 SV=1 - [SF3B5_HUMAN]	0	0	0	0	0	0.978129	1.93411	0.949037	1.28709	0.560523	0.0288964
Q9BWL3-3	Isoform 3 of Uncharacterized protein C1orf43 OS=Homo sapiens GN=C1orf43 - [CA043_HUMAN]	0	0	0	0	0	0.978129	0	0	0.326043	0.564723	0.211325
Q9BXJ0	Complement C1q tumor necrosis factor-related protein 5 OS=Homo sapiens GN=C1QTNF5 PE=1 SV=1 - [C1QT5_HUMAN]	0	0	0	0	0	0	0.967055	0	0.322352	0.55833	0.211325
Q9BXK5-4	Isoform 3 of Bcl-2-like protein 13 OS=Homo sapiens GN=BCL2L13 - [B2L13_HUMAN]	0	0	0	0	0	5.86877	3.86822	0	3.24567	2.98351	0.100105
Q9BXX0	EMILIN-2 OS=Homo sapiens GN=EMILIN2 PE=1 SV=3 - [EMIL2_HUMAN]	0	0	0	0	0	0.978129	0.967055	1.89807	1.28109	0.534356	0.0266959
Q9BXY0	Protein MAK16 homolog OS=Homo sapiens GN=MAK16 PE=1 SV=2 - [MAK16_HUMAN]	0	0	0	0	0	0	0	0.949037	0.316346	0.547927	0.211325
Q9BY77-2	Isoform 2 of Polymerase delta-interacting protein 3 OS=Homo sapiens GN=POLDIP3 - [PDIP3_HUMAN]	0	0	0	0	0	0.978129	0	0	0.326043	0.564723	0.211325
Q9BY89-2	Isoform 2 of Uncharacterized protein KIAA1671 OS=Homo sapiens GN=KIAA1671 - [K1671_HUMAN]	0	0	0	0	0	0	0.967055	0	0.322352	0.55833	0.211325
Q9BYJ4-2	Isoform 2 of Tripartite motif-containing protein 34 OS=Homo sapiens GN=TRIM34 - [TRI34_HUMAN]	0	0	0	0	0	0	0.967055	0	0.322352	0.55833	0.211325
Q9BYT8	Neurolysin, mitochondrial OS=Homo sapiens GN=NLN PE=1 SV=1 - [NEUL_HUMAN]	0	0	0	0	0	3.91252	0	0	1.30417	2.25889	0.211325
Q9BZ29-3	Isoform 3 of Dedicator of cytokinesis protein 9 OS=Homo sapiens GN=DOCK9 - [DOCK9_HUMAN]	0	0	0	0	0	0	0.967055	0	0.322352	0.55833	0.211325
Q9BZ29-6	Isoform 5 of Dedicator of cytokinesis protein 9 OS=Homo sapiens GN=DOCK9 - [DOCK9_HUMAN]	0	0	0	0	0	0.978129	0	0	0.326043	0.564723	0.211325
Q9BZE0	Zinc finger protein GLIS2 OS=Homo sapiens GN=GLIS2 PE=1 SV=2 - [GLIS2_HUMAN]	0	0	0	0	0	0.978129	0	0	0.326043	0.564723	0.211325
Q9BZI7-2	Isoform 2 of Regulator of nonsense transcripts 3B OS=Homo sapiens GN=UPF3B - [REN3B_HUMAN]	0	0	0	0	0	0.978129	1.93411	0	0.970747	0.967076	0.112116
Q9BZK7	F-box-like/WD repeat-containing protein TBL1XR1 OS=Homo sapiens GN=TBL1XR1 PE=1 SV=1 - [TBL1R_HUMAN]	0	0	0	0	0	0	0	0.949037	0.316346	0.547927	0.211325
Q9BZX2-2	Isoform 2 of Uridine-cytidine kinase 2 OS=Homo sapiens GN=UCK2 - [UCK2_HUMAN]	0	0	0	0	0	0	0	0.949037	0.316346	0.547927	0.211325
Q9C026-5	Isoform 5 of E3 ubiquitin-protein ligase TRIM9 OS=Homo sapiens GN=TRIM9 - [TRIM9_HUMAN]	0	0	0	0	0	0	0	0.949037	0.316346	0.547927	0.211325
Q9C037-2	Isoform Beta of Tripartite motif-containing protein 4 OS=Homo sapiens GN=TRIM4 - [TRIM4_HUMAN]	0	0	0	0	0	0	1.93411	0	0.644704	1.11666	0.211325
Q9C0B1-4	Isoform 4 of Alpha-ketoglutarate-dependent dioxygenase FTO OS=Homo sapiens GN=FTO - [FTO_HUMAN]	0	0	0	0	0	1.95626	0.967055	0	0.974438	0.97815	0.113292
Q9C0E8-2	Isoform 2 of Protein lunapark OS=Homo sapiens GN=LNP - [LNP_HUMAN]	0	0	0	0	0	11.7375	0	0	3.91252	6.77668	0.211325
Q9GZL7	Ribosome biogenesis protein WDR12 OS=Homo sapiens GN=WDR12 PE=1 SV=2 - [WDR12_HUMAN]	0	0	0	0	0	0.978129	0	1.89807	0.958734	0.949185	0.111157
Q9GZP0-2	Isoform 2 of Platelet-derived growth factor D OS=Homo sapiens GN=PDGFD - [PDGFD_HUMAN]	0	0	0	0	0	0	0.967055	0	0.322352	0.55833	0.211325
Q9GZS1-2	Isoform 2 of DNA-directed RNA polymerase I subunit RPA49 OS=Homo sapiens GN=POLR1E - [RPA49_HUMAN]	0	0	0	0	0	0.978129	0.967055	0.949037	0.96474	0.0146837	3.86052e-05
Q9H081	Protein MIS12 homolog OS=Homo sapiens GN=MIS12 PE=1 SV=1 - [MIS12_HUMAN]	0	0	0	0	0	0	0.967055	0	0.322352	0.55833	0.211325
Q9H0B6-2	Isoform 2 of Kinesin light chain 2 OS=Homo sapiens GN=KLC2 - [KLC2_HUMAN]	0	0	0	0	0	0	0	3.79615	1.26538	2.19171	0.211325
Q9H0N0	Ras-related protein Rab-6C OS=Homo sapiens GN=RAB6C PE=1 SV=2 - [RAB6C_HUMAN]	0	0	0	0	0	0.978129	0	1.89807	0.958734	0.949185	0.111157
Q9H173	Nucleotide exchange factor SIL1 OS=Homo sapiens GN=SIL1 PE=1 SV=1 - [SIL1_HUMAN]	0	0	0	0	0	1.95626	0	0	0.652086	1.12945	0.211325
Q9H1B4-3	Isoform C of Nuclear RNA export factor 5 OS=Homo sapiens GN=NXF5 - [NXF5_HUMAN]	0	0	0	0	0	0	0	0.949037	0.316346	0.547927	0.211325
Q9H1C3	Glycosyltransferase 8 domain-containing protein 2 OS=Homo sapiens GN=GLT8D2 PE=2 SV=1 - [GL8D2_HUMAN]	0	0	0	0	0	0	0.967055	0	0.322352	0.55833	0.211325
Q9H1E3	Nuclear ubiquitous casein and cyclin-dependent kinase substrate 1 OS=Homo sapiens GN=NUCKS1 PE=1 SV=1 - [NUCKS_HUMAN]	0	0	0	0	0	0.978129	1.93411	1.89807	1.60344	0.541833	0.0180096
Q9H1J1-2	Isoform 2 of Regulator of nonsense transcripts 3A OS=Homo sapiens GN=UPF3A - [REN3A_HUMAN]	0	0	0	0	0	0.978129	0	0	0.326043	0.564723	0.211325
Q9H1U9	Solute carrier family 25 member 51 OS=Homo sapiens GN=SLC25A51 PE=2 SV=1 - [S2551_HUMAN]	0	0	0	0	0	0.978129	0	0	0.326043	0.564723	0.211325
Q9H1Y0	Autophagy protein 5 OS=Homo sapiens GN=ATG5 PE=1 SV=2 - [ATG5_HUMAN]	0	0	0	0	0	0	0	1.89807	0.632691	1.09585	0.211325
Q9H2A2-4	Isoform 4 of Aldehyde dehydrogenase family 8 member A1 OS=Homo sapiens GN=ALDH8A1 - [AL8A1_HUMAN]	0	0	0	0	0	1.95626	0.967055	5.69422	2.87251	2.49322	0.0920556
Q9H2K8	Serine/threonine-protein kinase TAO3 OS=Homo sapiens GN=TAOK3 PE=1 SV=2 - [TAOK3_HUMAN]	0	0	0	0	0	1.95626	0	0	0.652086	1.12945	0.211325
Q9H2U2-3	Isoform 3 of Inorganic pyrophosphatase 2, mitochondrial OS=Homo sapiens GN=PPA2 - [IPYR2_HUMAN]	0	0	0	0	0	8.80316	0	0	2.93439	5.08251	0.211325
Q9H334-5	Isoform 5 of Forkhead box protein P1 OS=Homo sapiens GN=FOXP1 - [FOXP1_HUMAN]	0	0	0	0	0	0	0	0.949037	0.316346	0.547927	0.211325
Q9H425	Uncharacterized protein C1orf198 OS=Homo sapiens GN=C1orf198 PE=1 SV=1 - [CA198_HUMAN]	0	0	0	0	0	0	0	1.89807	0.632691	1.09585	0.211325
Q9H6A0-2	Isoform 2 of DENN domain-containing protein 2D OS=Homo sapiens GN=DENND2D - [DEN2D_HUMAN]	0	0	0	0	0	0.978129	0	0	0.326043	0.564723	0.211325
Q9H6L2-3	Isoform 3 of Transmembrane protein 231 OS=Homo sapiens GN=TMEM231 - [TM231_HUMAN]	0	0	0	0	0	0.978129	0	0.949037	0.642389	0.556515	0.0917982
Q9H6V9-2	Isoform 2 of UPF0554 protein C2orf43 OS=Homo sapiens GN=C2orf43 - [CB043_HUMAN]	0	0	0	0	0	0	0	3.79615	1.26538	2.19171	0.211325
Q9H6X2-3	Isoform 3 of Anthrax toxin receptor 1 OS=Homo sapiens GN=ANTXR1 - [ANTR1_HUMAN]	0	0	0	0	0	1.95626	1.93411	0.949037	1.61314	0.575233	0.0199343
Q9H6Y6	Unconventional myosin-Vb OS=Homo sapiens GN=MYO5B PE=2 SV=1 - [Q9H6Y6_HUMAN]	0	0	0	0	0	0.978129	0	0	0.326043	0.564723	0.211325
Q9H773	dCTP pyrophosphatase 1 OS=Homo sapiens GN=DCTPP1 PE=1 SV=1 - [DCTP1_HUMAN]	0	0	0	0	0	1.95626	1.93411	0.949037	1.61314	0.575233	0.0199343
Q9H7X7-3	Isoform 3 of Rab-like protein 5 OS=Homo sapiens GN=RABL5 - [RABL5_HUMAN]	0	0	0	0	0	0	0	0.949037	0.316346	0.547927	0.211325
Q9H9S5	Fukutin-related protein OS=Homo sapiens GN=FKRP PE=1 SV=1 - [FKRP_HUMAN]	0	0	0	0	0	0	0.967055	0	0.322352	0.55833	0.211325
Q9HAJ7-2	Isoform 2 of Histone deacetylase complex subunit SAP30L OS=Homo sapiens GN=SAP30L - [SP30L_HUMAN]	0	0	0	0	0	0	0.967055	0	0.322352	0.55833	0.211325
Q9HAU0-3	Isoform 3 of Pleckstrin homology domain-containing family A member 5 OS=Homo sapiens GN=PLEKHA5 - [PKHA5_HUMAN]	0	0	0	0	0	0	1.93411	0	0.644704	1.11666	0.211325
Q9HAV0	Guanine nucleotide-binding protein subunit beta-4 OS=Homo sapiens GN=GNB4 PE=1 SV=3 - [GBB4_HUMAN]	0	0	0	0	0	17.6063	18.3741	18.0317	18.004	0.384612	7.60424e-05
Q9HB19	Pleckstrin homology domain-containing family A member 2 OS=Homo sapiens GN=PLEKHA2 PE=1 SV=2 - [PKHA2_HUMAN]	0	0	0	0	0	0	0	0.949037	0.316346	0.547927	0.211325
Q9HB63-3	Isoform 3 of Netrin-4 OS=Homo sapiens GN=NTN4 - [NET4_HUMAN]	0	0	0	0	0	0	0.967055	0.949037	0.638697	0.553201	0.0917698
Q9HBI0-3	Isoform 3 of Gamma-parvin OS=Homo sapiens GN=PARVG - [PARVG_HUMAN]	0	0	0	0	0	0.978129	1.93411	0.949037	1.28709	0.560523	0.0288964
Q9HBI1-3	Isoform 3 of Beta-parvin OS=Homo sapiens GN=PARVB - [PARVB_HUMAN]	0	0	0	0	0	7.82503	0	6.64326	4.82276	4.21823	0.0931068
Q9HBI6	Cytochrome P450 4F11 OS=Homo sapiens GN=CYP4F11 PE=2 SV=3 - [CP4FB_HUMAN]	0	0	0	0	0	0	0.967055	0	0.322352	0.55833	0.211325
Q9HBM0-2	Isoform 2 of Vezatin OS=Homo sapiens GN=VEZT - [VEZA_HUMAN]	0	0	0	0	0	0	0.967055	0.949037	0.638697	0.553201	0.0917698
Q9HC23-2	Isoform 2 of Prokineticin-2 OS=Homo sapiens GN=PROK2 - [PROK2_HUMAN]	0	0	0	0	0	0	0	0.949037	0.316346	0.547927	0.211325
Q9HC78-2	Isoform 2 of Zinc finger and BTB domain-containing protein 20 OS=Homo sapiens GN=ZBTB20 - [ZBT20_HUMAN]	0	0	0	0	0	0.978129	0	0	0.326043	0.564723	0.211325
Q9HCD5	Nuclear receptor coactivator 5 OS=Homo sapiens GN=NCOA5 PE=1 SV=2 - [NCOA5_HUMAN]	0	0	0	0	0	2.93439	1.93411	0.949037	1.93918	0.992685	0.0386758
Q9HCH5-4	Isoform 3 of Synaptotagmin-like protein 2 OS=Homo sapiens GN=SYTL2 - [SYTL2_HUMAN]	0	0	0	0	0	0	1.93411	0	0.644704	1.11666	0.211325
Q9HCH5-6	Isoform 4 of Synaptotagmin-like protein 2 OS=Homo sapiens GN=SYTL2 - [SYTL2_HUMAN]	0	0	0	0	0	0	0	0.949037	0.316346	0.547927	0.211325
Q9HCM1	Uncharacterized protein KIAA1551 OS=Homo sapiens GN=KIAA1551 PE=1 SV=3 - [K1551_HUMAN]	0	0	0	0	0	0	0	0.949037	0.316346	0.547927	0.211325
Q9HDC5	Junctophilin-1 OS=Homo sapiens GN=JPH1 PE=1 SV=2 - [JPH1_HUMAN]	0	0	0	0	0	0	0	0.949037	0.316346	0.547927	0.211325
Q9NNX6-3	Isoform 3 of CD209 antigen OS=Homo sapiens GN=CD209 - [CD209_HUMAN]	0	0	0	0	0	0	1.93411	0	0.644704	1.11666	0.211325
Q9NP73-2	Isoform 2 of UDP-N-acetylglucosamine transferase subunit ALG13 homolog OS=Homo sapiens GN=ALG13 - [ALG13_HUMAN]	0	0	0	0	0	0.978129	0	0	0.326043	0.564723	0.211325
Q9NP77	RNA polymerase II subunit A C-terminal domain phosphatase SSU72 OS=Homo sapiens GN=SSU72 PE=1 SV=1 - [SSU72_HUMAN]	0	0	0	0	0	0	2.90117	1.89807	1.59975	1.47341	0.100387
Q9NPC6	Myozenin-2 OS=Homo sapiens GN=MYOZ2 PE=1 SV=1 - [MYOZ2_HUMAN]	0	0	0	0	0	0	0.967055	0	0.322352	0.55833	0.211325
Q9NPG1	Frizzled-3 OS=Homo sapiens GN=FZD3 PE=1 SV=1 - [FZD3_HUMAN]	0	0	0	0	0	0	0.967055	0	0.322352	0.55833	0.211325
Q9NPJ6	Mediator of RNA polymerase II transcription subunit 4 OS=Homo sapiens GN=MED4 PE=1 SV=1 - [MED4_HUMAN]	0	0	0	0	0	0	0.967055	0.949037	0.638697	0.553201	0.0917698
Q9NQ66-2	Isoform B of 1-phosphatidylinositol 4,5-bisphosphate phosphodiesterase beta-1 OS=Homo sapiens GN=PLCB1 - [PLCB1_HUMAN]	0	0	0	0	0	0	1.93411	0	0.644704	1.11666	0.211325
Q9NQ84	G-protein coupled receptor family C group 5 member C OS=Homo sapiens GN=GPRC5C PE=1 SV=2 - [GPC5C_HUMAN]	0	0	0	0	0	0	0	0.949037	0.316346	0.547927	0.211325
Q9NQV5-2	Isoform 2 of PR domain-containing protein 11 OS=Homo sapiens GN=PRDM11 - [PRD11_HUMAN]	0	0	0	0	0	0	0	0.949037	0.316346	0.547927	0.211325
Q9NQW5-1	Isoform 3 of Probable histone-lysine N-methyltransferase PRDM7 OS=Homo sapiens GN=PRDM7 - [PRDM7_HUMAN]	0	0	0	0	0	0	0.967055	0	0.322352	0.55833	0.211325
Q9NQX4	Unconventional myosin-Vc OS=Homo sapiens GN=MYO5C PE=1 SV=2 - [MYO5C_HUMAN]	0	0	0	0	0	1.95626	0	0.949037	0.968432	0.978273	0.114274
Q9NR12	PDZ and LIM domain protein 7 OS=Homo sapiens GN=PDLIM7 PE=1 SV=1 - [PDLI7_HUMAN]	0	0	0	0	0	0	20.3082	0	6.76939	11.7249	0.211325
Q9NR56-3	Isoform 3 of Muscleblind-like protein 1 OS=Homo sapiens GN=MBNL1 - [MBNL1_HUMAN]	0	0	0	0	0	0	0.967055	0	0.322352	0.55833	0.211325
Q9NRF9	DNA polymerase epsilon subunit 3 OS=Homo sapiens GN=POLE3 PE=1 SV=1 - [DPOE3_HUMAN]	0	0	0	0	0	0.978129	0.967055	0	0.648395	0.561554	0.0917583
Q9NRG1-2	Isoform 2 of Phosphoribosyltransferase domain-containing protein 1 OS=Homo sapiens GN=PRTFDC1 - [PRDC1_HUMAN]	0	0	0	0	0	0	0.967055	0	0.322352	0.55833	0.211325
Q9NRJ5	Poly(A) polymerase beta OS=Homo sapiens GN=PAPOLB PE=2 SV=1 - [PAPOB_HUMAN]	0	0	0	0	0	0.978129	0	0	0.326043	0.564723	0.211325
Q9NRJ7	Protocadherin beta-16 OS=Homo sapiens GN=PCDHB16 PE=1 SV=3 - [PCDBG_HUMAN]	0	0	0	0	0	0	0	0.949037	0.316346	0.547927	0.211325
Q9NRM1	Enamelin OS=Homo sapiens GN=ENAM PE=2 SV=3 - [ENAM_HUMAN]	0	0	0	0	0	0.978129	0	0	0.326043	0.564723	0.211325
Q9NRW1	Ras-related protein Rab-6B OS=Homo sapiens GN=RAB6B PE=1 SV=1 - [RAB6B_HUMAN]	0	0	0	0	0	20.5407	0	20.8788	13.8065	11.958	0.0917653
Q9NRX3	NADH dehydrogenase [ubiquinone] 1 alpha subcomplex subunit 4-like 2 OS=Homo sapiens GN=NDUFA4L2 PE=2 SV=1 - [NUA4L_HUMAN]	0	0	0	0	0	1.95626	0.967055	0.949037	1.29078	0.576388	0.0302488
Q9NRX4-2	Isoform 2 of 14 kDa phosphohistidine phosphatase OS=Homo sapiens GN=PHPT1 - [PHP14_HUMAN]	0	0	0	0	0	1.95626	2.90117	1.89807	2.25183	0.563091	0.0101067
Q9NS00-2	Isoform 2 of Glycoprotein-N-acetylgalactosamine 3-beta-galactosyltransferase 1 OS=Homo sapiens GN=C1GALT1 - [C1GLT_HUMAN]	0	0	0	0	0	0	0.967055	0	0.322352	0.55833	0.211325
Q9NSB4	Keratin, type II cuticular Hb2 OS=Homo sapiens GN=KRT82 PE=1 SV=3 - [KRT82_HUMAN]	0	0	0	0	0	1.95626	0	0	0.652086	1.12945	0.211325
Q9NSC5-5	Isoform 5 of Homer protein homolog 3 OS=Homo sapiens GN=HOMER3 - [HOME3_HUMAN]	0	0	0	0	0	1.95626	0	0	0.652086	1.12945	0.211325
Q9NTJ4-3	Isoform 3 of Alpha-mannosidase 2C1 OS=Homo sapiens GN=MAN2C1 - [MA2C1_HUMAN]	0	0	0	0	0	0	0	0.949037	0.316346	0.547927	0.211325
Q9NU22	Midasin OS=Homo sapiens GN=MDN1 PE=1 SV=2 - [MDN1_HUMAN]	0	0	0	0	0	1.95626	0	0	0.652086	1.12945	0.211325
Q9NUB1-3	Isoform 3 of Acetyl-coenzyme A synthetase 2-like, mitochondrial OS=Homo sapiens GN=ACSS1 - [ACS2L_HUMAN]	0	0	0	0	0	0	1.93411	3.79615	1.91009	1.89819	0.111736
Q9NUG6	p53 and DNA damage-regulated protein 1 OS=Homo sapiens GN=PDRG1 PE=2 SV=2 - [PDRG1_HUMAN]	0	0	0	0	0	0	0.967055	0	0.322352	0.55833	0.211325
Q9NUI1-2	Isoform 2 of Peroxisomal 2,4-dienoyl-CoA reductase OS=Homo sapiens GN=DECR2 - [DECR2_HUMAN]	0	0	0	0	0	0	0	1.89807	0.632691	1.09585	0.211325
Q9NUJ3	T-complex protein 11-like protein 1 OS=Homo sapiens GN=TCP11L1 PE=1 SV=1 - [T11L1_HUMAN]	0	0	0	0	0	1.95626	0	0	0.652086	1.12945	0.211325
Q9NVH6-4	Isoform 3 of Trimethyllysine dioxygenase, mitochondrial OS=Homo sapiens GN=TMLHE - [TMLH_HUMAN]	0	0	0	0	0	1.95626	0	0	0.652086	1.12945	0.211325
Q9NVI7-3	Isoform 3 of ATPase family AAA domain-containing protein 3A OS=Homo sapiens GN=ATAD3A - [ATD3A_HUMAN]	0	0	0	0	0	5.86877	0	0	1.95626	3.38834	0.211325
Q9NVK5-2	Isoform 2 of FGFR1 oncogene partner 2 OS=Homo sapiens GN=FGFR1OP2 - [FGOP2_HUMAN]	0	0	0	0	0	0	0	0.949037	0.316346	0.547927	0.211325
Q9NVP1	ATP-dependent RNA helicase DDX18 OS=Homo sapiens GN=DDX18 PE=1 SV=2 - [DDX18_HUMAN]	0	0	0	0	0	1.95626	0	0.949037	0.968432	0.978273	0.114274
Q9NVS2	28S ribosomal protein S18a, mitochondrial OS=Homo sapiens GN=MRPS18A PE=1 SV=1 - [RT18A_HUMAN]	0	0	0	0	0	0	0	0.949037	0.316346	0.547927	0.211325
Q9NVU7-2	Isoform 2 of Protein SDA1 homolog OS=Homo sapiens GN=SDAD1 - [SDA1_HUMAN]	0	0	0	0	0	0	0.967055	0.949037	0.638697	0.553201	0.0917698
Q9NWL6	Asparagine synthetase domain-containing protein 1 OS=Homo sapiens GN=ASNSD1 PE=2 SV=2 - [ASND1_HUMAN]	0	0	0	0	0	0	0.967055	0	0.322352	0.55833	0.211325
Q9NWT6	Hypoxia-inducible factor 1-alpha inhibitor OS=Homo sapiens GN=HIF1AN PE=1 SV=2 - [HIF1N_HUMAN]	0	0	0	0	0	0	1.93411	0	0.644704	1.11666	0.211325
Q9NWV8-3	Isoform 3 of BRISC and BRCA1-A complex member 1 OS=Homo sapiens GN=BABAM1 - [BABA1_HUMAN]	0	0	0	0	0	0	1.93411	0	0.644704	1.11666	0.211325
Q9NX58	Cell growth-regulating nucleolar protein OS=Homo sapiens GN=LYAR PE=1 SV=2 - [LYAR_HUMAN]	0	0	0	0	0	0	0	0.949037	0.316346	0.547927	0.211325
Q9NX76	CKLF-like MARVEL transmembrane domain-containing protein 6 OS=Homo sapiens GN=CMTM6 PE=1 SV=1 - [CKLF6_HUMAN]	0	0	0	0	0	1.95626	2.90117	1.89807	2.25183	0.563091	0.0101067
Q9NXL6	SID1 transmembrane family member 1 OS=Homo sapiens GN=SIDT1 PE=2 SV=2 - [SIDT1_HUMAN]	0	0	0	0	0	0	0.967055	0	0.322352	0.55833	0.211325
Q9NXL9-3	Isoform 3 of DNA helicase MCM9 OS=Homo sapiens GN=MCM9 - [MCM9_HUMAN]	0	0	0	0	0	0	0	0.949037	0.316346	0.547927	0.211325
Q9NXR7-4	Isoform 4 of BRCA1-A complex subunit BRE OS=Homo sapiens GN=BRE - [BRE_HUMAN]	0	0	0	0	0	1.95626	0	0	0.652086	1.12945	0.211325
Q9NXV6	CDKN2A-interacting protein OS=Homo sapiens GN=CDKN2AIP PE=1 SV=3 - [CARF_HUMAN]	0	0	0	0	0	3.91252	0	2.84711	2.25321	2.02274	0.09673
Q9NYB0	Telomeric repeat-binding factor 2-interacting protein 1 OS=Homo sapiens GN=TERF2IP PE=1 SV=1 - [TE2IP_HUMAN]	0	0	0	0	0	0	0	0.949037	0.316346	0.547927	0.211325
Q9NYF0-2	Isoform 2 of Dapper homolog 1 OS=Homo sapiens GN=DACT1 - [DACT1_HUMAN]	0	0	0	0	0	0	0.967055	0.949037	0.638697	0.553201	0.0917698
Q9NYU1	UDP-glucose:glycoprotein glucosyltransferase 2 OS=Homo sapiens GN=UGGT2 PE=1 SV=4 - [UGGG2_HUMAN]	0	0	0	0	0	1.95626	0	0.949037	0.968432	0.978273	0.114274
Q9NZ43	Vesicle transport protein USE1 OS=Homo sapiens GN=USE1 PE=1 SV=2 - [USE1_HUMAN]	0	0	0	0	0	3.91252	7.73644	5.69422	5.78106	1.91344	0.0173156
Q9NZC7-3	Isoform 3 of WW domain-containing oxidoreductase OS=Homo sapiens GN=WWOX - [WWOX_HUMAN]	0	0	0	0	0	0	0	1.89807	0.632691	1.09585	0.211325
Q9NZK5-2	Isoform 2 of Adenosine deaminase CECR1 OS=Homo sapiens GN=CECR1 - [CECR1_HUMAN]	0	0	0	0	0	0.978129	0.967055	0	0.648395	0.561554	0.0917583
Q9NZL4	Hsp70-binding protein 1 OS=Homo sapiens GN=HSPBP1 PE=1 SV=1 - [HPBP1_HUMAN]	0	0	0	0	0	0	1.93411	0	0.644704	1.11666	0.211325
Q9NZR4-4	Isoform 4 of Visual system homeobox 1 OS=Homo sapiens GN=VSX1 - [VSX1_HUMAN]	0	0	0	0	0	0	0	0.949037	0.316346	0.547927	0.211325
Q9NZT1	Calmodulin-like protein 5 OS=Homo sapiens GN=CALML5 PE=1 SV=2 - [CALL5_HUMAN]	0	0	0	0	0	0.978129	1.93411	2.84711	1.91978	0.934573	0.035359
Q9NZU5	LIM and cysteine-rich domains protein 1 OS=Homo sapiens GN=LMCD1 PE=1 SV=1 - [LMCD1_HUMAN]	0	0	0	0	0	0	13.5388	0	4.51292	7.81662	0.211325
Q9P121-3	Isoform 3 of Neurotrimin OS=Homo sapiens GN=NTM - [NTRI_HUMAN]	0	0	0	0	0	0.978129	0	0	0.326043	0.564723	0.211325
Q9P217	Zinc finger SWIM domain-containing protein 5 OS=Homo sapiens GN=ZSWIM5 PE=2 SV=2 - [ZSWM5_HUMAN]	0	0	0	0	0	0.978129	0	0.949037	0.642389	0.556515	0.0917982
Q9P243-3	Isoform 3 of Zinc finger protein ZFAT OS=Homo sapiens GN=ZFAT - [ZFAT_HUMAN]	0	0	0	0	0	0.978129	0	0	0.326043	0.564723	0.211325
Q9P273	Teneurin-3 OS=Homo sapiens GN=TENM3 PE=2 SV=3 - [TEN3_HUMAN]	0	0	0	0	0	0	0	0.949037	0.316346	0.547927	0.211325
Q9P2D7-3	Isoform 3 of Dynein heavy chain 1, axonemal OS=Homo sapiens GN=DNAH1 - [DYH1_HUMAN]	0	0	0	0	0	0	0	0.949037	0.316346	0.547927	0.211325
Q9P2D7-5	Isoform 5 of Dynein heavy chain 1, axonemal OS=Homo sapiens GN=DNAH1 - [DYH1_HUMAN]	0	0	0	0	0	0	0.967055	0	0.322352	0.55833	0.211325
Q9P2E3	NFX1-type zinc finger-containing protein 1 OS=Homo sapiens GN=ZNFX1 PE=1 SV=2 - [ZNFX1_HUMAN]	0	0	0	0	0	0	0	0.949037	0.316346	0.547927	0.211325
Q9P2E9-2	Isoform 1 of Ribosome-binding protein 1 OS=Homo sapiens GN=RRBP1 - [RRBP1_HUMAN]	0	0	0	0	0	0	93.8044	0	31.2681	54.158	0.211325
Q9P2F8-2	Isoform 2 of Signal-induced proliferation-associated 1-like protein 2 OS=Homo sapiens GN=SIPA1L2 - [SI1L2_HUMAN]	0	0	0	0	0	0.978129	0	0	0.326043	0.564723	0.211325
Q9P2G4	Microtubule-associated protein 10 OS=Homo sapiens GN=MAP10 PE=1 SV=2 - [MAP10_HUMAN]	0	0	0	0	0	0.978129	0	0	0.326043	0.564723	0.211325
Q9P2K5-2	Isoform 2 of Myelin expression factor 2 OS=Homo sapiens GN=MYEF2 - [MYEF2_HUMAN]	0	0	0	0	0	1.95626	2.90117	1.89807	2.25183	0.563091	0.0101067
Q9P2R3	Ankyrin repeat and FYVE domain-containing protein 1 OS=Homo sapiens GN=ANKFY1 PE=1 SV=2 - [ANFY1_HUMAN]	0	0	0	0	0	0	0.967055	0	0.322352	0.55833	0.211325
Q9P2S2-2	Isoform 2a of Neurexin-2 OS=Homo sapiens GN=NRXN2 - [NRX2A_HUMAN]	0	0	0	0	0	0.978129	0	0	0.326043	0.564723	0.211325
Q9UBE0	SUMO-activating enzyme subunit 1 OS=Homo sapiens GN=SAE1 PE=1 SV=1 - [SAE1_HUMAN]	0	0	0	0	0	0	3.86822	0	1.28941	2.23332	0.211325
Q9UBK9	Protein UXT OS=Homo sapiens GN=UXT PE=1 SV=1 - [UXT_HUMAN]	0	0	0	0	0	0	0.967055	0	0.322352	0.55833	0.211325
Q9UBP9-3	Isoform 3 of PTB domain-containing engulfment adapter protein 1 OS=Homo sapiens GN=GULP1 - [GULP1_HUMAN]	0	0	0	0	0	0.978129	0	0	0.326043	0.564723	0.211325
Q9UBU8-3	Isoform 3 of Mortality factor 4-like protein 1 OS=Homo sapiens GN=MORF4L1 - [MO4L1_HUMAN]	0	0	0	0	0	1.95626	0	0	0.652086	1.12945	0.211325
Q9UBW7-2	Isoform 2 of Zinc finger MYM-type protein 2 OS=Homo sapiens GN=ZMYM2 - [ZMYM2_HUMAN]	0	0	0	0	0	0	0.967055	0	0.322352	0.55833	0.211325
Q9UDW1-2	Isoform 2 of Cytochrome b-c1 complex subunit 9 OS=Homo sapiens GN=UQCR10 - [QCR9_HUMAN]	0	0	0	0	0	0.978129	0	0	0.326043	0.564723	0.211325
Q9UDY2-5	Isoform A3 of Tight junction protein ZO-2 OS=Homo sapiens GN=TJP2 - [ZO2_HUMAN]	0	0	0	0	0	10.7594	0	0	3.58647	6.21195	0.211325
Q9UDY4	DnaJ homolog subfamily B member 4 OS=Homo sapiens GN=DNAJB4 PE=1 SV=1 - [DNJB4_HUMAN]	0	0	0	0	0	0	1.93411	0.949037	0.961049	0.967111	0.113678
Q9UEU0	Vesicle transport through interaction with t-SNAREs homolog 1B OS=Homo sapiens GN=VTI1B PE=1 SV=3 - [VTI1B_HUMAN]	0	0	0	0	0	0	3.86822	0	1.28941	2.23332	0.211325
Q9UEW8	STE20/SPS1-related proline-alanine-rich protein kinase OS=Homo sapiens GN=STK39 PE=1 SV=3 - [STK39_HUMAN]	0	0	0	0	0	1.95626	1.93411	0.949037	1.61314	0.575233	0.0199343
Q9UFW8	CGG triplet repeat-binding protein 1 OS=Homo sapiens GN=CGGBP1 PE=1 SV=2 - [CGBP1_HUMAN]	0	0	0	0	0	0.978129	0	0	0.326043	0.564723	0.211325
Q9UGL1-2	Isoform 2 of Lysine-specific demethylase 5B OS=Homo sapiens GN=KDM5B - [KDM5B_HUMAN]	0	0	0	0	0	0	0	0.949037	0.316346	0.547927	0.211325
Q9UGM5-2	Isoform 2 of Fetuin-B OS=Homo sapiens GN=FETUB - [FETUB_HUMAN]	0	0	0	0	0	0	0	0.949037	0.316346	0.547927	0.211325
Q9UH99	SUN domain-containing protein 2 OS=Homo sapiens GN=SUN2 PE=1 SV=3 - [SUN2_HUMAN]	0	0	0	0	0	34.2345	35.781	33.2163	34.4106	1.29142	0.00023458
Q9UHB6	LIM domain and actin-binding protein 1 OS=Homo sapiens GN=LIMA1 PE=1 SV=1 - [LIMA1_HUMAN]	0	0	0	0	0	0	0	17.0827	5.69422	9.86268	0.211325
Q9UHI7-3	Isoform 3 of Solute carrier family 23 member 1 OS=Homo sapiens GN=SLC23A1 - [S23A1_HUMAN]	0	0	0	0	0	1.95626	0	0.949037	0.968432	0.978273	0.114274
Q9UHN6-2	Isoform 2 of Transmembrane protein 2 OS=Homo sapiens GN=TMEM2 - [TMEM2_HUMAN]	0	0	0	0	0	0	0	1.89807	0.632691	1.09585	0.211325
Q9UHQ4	B-cell receptor-associated protein 29 OS=Homo sapiens GN=BCAP29 PE=1 SV=2 - [BAP29_HUMAN]	0	0	0	0	0	5.86877	0	0	1.95626	3.38834	0.211325
Q9UHR4	Brain-specific angiogenesis inhibitor 1-associated protein 2-like protein 1 OS=Homo sapiens GN=BAIAP2L1 PE=1 SV=2 - [BI2L1_HUMAN]	0	0	0	0	0	0.978129	0	0.949037	0.642389	0.556515	0.0917982
Q9UHV7	Mediator of RNA polymerase II transcription subunit 13 OS=Homo sapiens GN=MED13 PE=1 SV=3 - [MED13_HUMAN]	0	0	0	0	0	0	0	0.949037	0.316346	0.547927	0.211325
Q9UHX3-5	Isoform 5 of EGF-like module-containing mucin-like hormone receptor-like 2 OS=Homo sapiens GN=EMR2 - [EMR2_HUMAN]	0	0	0	0	0	0.978129	0	0.949037	0.642389	0.556515	0.0917982
Q9UIB8-6	Isoform 6 of SLAM family member 5 OS=Homo sapiens GN=CD84 - [SLAF5_HUMAN]	0	0	0	0	0	0	0.967055	0.949037	0.638697	0.553201	0.0917698
Q9UIE0	Zinc finger protein 230 OS=Homo sapiens GN=ZNF230 PE=2 SV=3 - [ZN230_HUMAN]	0	0	0	0	0	0.978129	0	0	0.326043	0.564723	0.211325
Q9UII2	ATPase inhibitor, mitochondrial OS=Homo sapiens GN=ATPIF1 PE=1 SV=1 - [ATIF1_HUMAN]	0	0	0	0	0	0	1.93411	2.84711	1.59374	1.45375	0.0989973
Q9UIK5-3	Isoform 3 of Tomoregulin-2 OS=Homo sapiens GN=TMEFF2 - [TEFF2_HUMAN]	0	0	0	0	0	0.978129	0	0	0.326043	0.564723	0.211325
Q9UIS9-4	Isoform 4 of Methyl-CpG-binding domain protein 1 OS=Homo sapiens GN=MBD1 - [MBD1_HUMAN]	0	0	0	0	0	0.978129	0	0.949037	0.642389	0.556515	0.0917982
Q9UIV1-2	Isoform 2 of CCR4-NOT transcription complex subunit 7 OS=Homo sapiens GN=CNOT7 - [CNOT7_HUMAN]	0	0	0	0	0	4.89065	3.86822	0	2.91962	2.57963	0.094505
Q9UJG1-2	Isoform 2 of Motile sperm domain-containing protein 1 OS=Homo sapiens GN=MOSPD1 - [MSPD1_HUMAN]	0	0	0	0	0	0	0.967055	0	0.322352	0.55833	0.211325
Q9UJT2-2	Isoform 2 of Testis-specific serine kinase substrate OS=Homo sapiens GN=TSKS - [TSKS_HUMAN]	0	0	0	0	0	0	0	0.949037	0.316346	0.547927	0.211325
Q9UJU6	Drebrin-like protein OS=Homo sapiens GN=DBNL PE=1 SV=1 - [DBNL_HUMAN]	0	0	0	0	0	0	15.4729	0	5.15763	8.93327	0.211325
Q9UJX3-2	Isoform 2 of Anaphase-promoting complex subunit 7 OS=Homo sapiens GN=ANAPC7 - [APC7_HUMAN]	0	0	0	0	0	0	0.967055	1.89807	0.955043	0.949094	0.111736
Q9UJY1	Heat shock protein beta-8 OS=Homo sapiens GN=HSPB8 PE=1 SV=1 - [HSPB8_HUMAN]	0	0	0	0	0	1.95626	0	0	0.652086	1.12945	0.211325
Q9UK22	F-box only protein 2 OS=Homo sapiens GN=FBXO2 PE=1 SV=2 - [FBX2_HUMAN]	0	0	0	0	0	0	1.93411	0	0.644704	1.11666	0.211325
Q9UK55	Protein Z-dependent protease inhibitor OS=Homo sapiens GN=SERPINA10 PE=1 SV=1 - [ZPI_HUMAN]	0	0	0	0	0	0.978129	0	0.949037	0.642389	0.556515	0.0917982
Q9UKK9	ADP-sugar pyrophosphatase OS=Homo sapiens GN=NUDT5 PE=1 SV=1 - [NUDT5_HUMAN]	0	0	0	0	0	2.93439	0	0	0.978129	1.69417	0.211325
Q9UKU9	Angiopoietin-related protein 2 OS=Homo sapiens GN=ANGPTL2 PE=2 SV=1 - [ANGL2_HUMAN]	0	0	0	0	0	3.91252	3.86822	2.84711	3.54262	0.602733	0.00475575
Q9UKX5	Integrin alpha-11 OS=Homo sapiens GN=ITGA11 PE=1 SV=2 - [ITA11_HUMAN]	0	0	0	0	0	1.95626	1.93411	1.89807	1.92948	0.0293673	3.86052e-05
Q9UKY3	Putative inactive carboxylesterase 4 OS=Homo sapiens GN=CES1P1 PE=5 SV=2 - [CES1P_HUMAN]	0	0	0	0	0	0.978129	0	0	0.326043	0.564723	0.211325
Q9UL26	Ras-related protein Rab-22A OS=Homo sapiens GN=RAB22A PE=1 SV=2 - [RB22A_HUMAN]	0	0	0	0	0	4.89065	0	0	1.63022	2.82362	0.211325
Q9UL42	Paraneoplastic antigen Ma2 OS=Homo sapiens GN=PNMA2 PE=1 SV=2 - [PNMA2_HUMAN]	0	0	0	0	0	0.978129	0.967055	0	0.648395	0.561554	0.0917583
Q9UL54-3	Isoform 3 of Serine/threonine-protein kinase TAO2 OS=Homo sapiens GN=TAOK2 - [TAOK2_HUMAN]	0	0	0	0	0	0	0.967055	0	0.322352	0.55833	0.211325
Q9UM00-2	Isoform 2 of Transmembrane and coiled-coil domain-containing protein 1 OS=Homo sapiens GN=TMCO1 - [TMCO1_HUMAN]	0	0	0	0	0	1.95626	2.90117	0	1.61914	1.47967	0.0992635
Q9UNX9	ATP-sensitive inward rectifier potassium channel 14 OS=Homo sapiens GN=KCNJ14 PE=1 SV=1 - [IRK14_HUMAN]	0	0	0	0	0	0	0.967055	0	0.322352	0.55833	0.211325
Q9UP83-3	Isoform 3 of Conserved oligomeric Golgi complex subunit 5 OS=Homo sapiens GN=COG5 - [COG5_HUMAN]	0	0	0	0	0	1.95626	0.967055	0	0.974438	0.97815	0.113292
Q9UPP2-2	Isoform 2 of IQ motif and SEC7 domain-containing protein 3 OS=Homo sapiens GN=IQSEC3 - [IQEC3_HUMAN]	0	0	0	0	0	0	0.967055	0	0.322352	0.55833	0.211325
Q9UPR0-2	Isoform 2 of Inactive phospholipase C-like protein 2 OS=Homo sapiens GN=PLCL2 - [PLCL2_HUMAN]	0	0	0	0	0	0.978129	0	0	0.326043	0.564723	0.211325
Q9UPV9-3	Isoform 3 of Trafficking kinesin-binding protein 1 OS=Homo sapiens GN=TRAK1 - [TRAK1_HUMAN]	0	0	0	0	0	0	0.967055	0	0.322352	0.55833	0.211325
Q9UQL0	Ubiquitin-conjugating enzyme 1 isoform OS=Homo sapiens GN=UBE2D4 PE=3 SV=1 - [Q9UQL0_HUMAN]	0	0	0	0	0	0.978129	0	0	0.326043	0.564723	0.211325
Q9UQP3	Tenascin-N OS=Homo sapiens GN=TNN PE=1 SV=2 - [TENN_HUMAN]	0	0	0	0	0	2.93439	1.93411	0	1.62283	1.49175	0.100105
Q9Y224	UPF0568 protein C14orf166 OS=Homo sapiens GN=C14orf166 PE=1 SV=1 - [CN166_HUMAN]	0	0	0	0	0	0	0	7.59229	2.53076	4.38341	0.211325
Q9Y240	C-type lectin domain family 11 member A OS=Homo sapiens GN=CLEC11A PE=1 SV=1 - [CLC11_HUMAN]	0	0	0	0	0	5.86877	8.7035	7.59229	7.38819	1.42834	0.00611522
Q9Y250-2	Isoform 2 of Leucine zipper putative tumor suppressor 1 OS=Homo sapiens GN=LZTS1 - [LZTS1_HUMAN]	0	0	0	0	0	0	1.93411	0	0.644704	1.11666	0.211325
Q9Y285	Phenylalanine--tRNA ligase alpha subunit OS=Homo sapiens GN=FARSA PE=1 SV=3 - [SYFA_HUMAN]	0	0	0	0	0	8.80316	11.6047	0	6.80261	6.05547	0.0955448
Q9Y2C9	Toll-like receptor 6 OS=Homo sapiens GN=TLR6 PE=1 SV=2 - [TLR6_HUMAN]	0	0	0	0	0	0	0	0.949037	0.316346	0.547927	0.211325
Q9Y2D0	Carbonic anhydrase 5B, mitochondrial OS=Homo sapiens GN=CA5B PE=1 SV=1 - [CAH5B_HUMAN]	0	0	0	0	0	0.978129	0	0	0.326043	0.564723	0.211325
Q9Y2D4-2	Isoform 2 of Exocyst complex component 6B OS=Homo sapiens GN=EXOC6B - [EXC6B_HUMAN]	0	0	0	0	0	0	1.93411	1.89807	1.27739	1.1064	0.0917698
Q9Y2I8	WD repeat-containing protein 37 OS=Homo sapiens GN=WDR37 PE=2 SV=2 - [WDR37_HUMAN]	0	0	0	0	0	0	0	0.949037	0.316346	0.547927	0.211325
Q9Y2U5	Mitogen-activated protein kinase kinase kinase 2 OS=Homo sapiens GN=MAP3K2 PE=1 SV=2 - [M3K2_HUMAN]	0	0	0	0	0	0.978129	0	0	0.326043	0.564723	0.211325
Q9Y312	Protein AAR2 homolog OS=Homo sapiens GN=AAR2 PE=1 SV=2 - [AAR2_HUMAN]	0	0	0	0	0	0.978129	0	0.949037	0.642389	0.556515	0.0917982
Q9Y314	Nitric oxide synthase-interacting protein OS=Homo sapiens GN=NOSIP PE=1 SV=1 - [NOSIP_HUMAN]	0	0	0	0	0	0	0.967055	0	0.322352	0.55833	0.211325
Q9Y371	Endophilin-B1 OS=Homo sapiens GN=SH3GLB1 PE=1 SV=1 - [SHLB1_HUMAN]	0	0	0	0	0	0	5.80233	5.69422	3.83218	3.31921	0.0917698
Q9Y385	Ubiquitin-conjugating enzyme E2 J1 OS=Homo sapiens GN=UBE2J1 PE=1 SV=2 - [UB2J1_HUMAN]	0	0	0	0	0	0.978129	0	1.89807	0.958734	0.949185	0.111157
Q9Y394-2	Isoform 2 of Dehydrogenase/reductase SDR family member 7 OS=Homo sapiens GN=DHRS7 - [DHRS7_HUMAN]	0	0	0	0	0	13.6938	9.67055	7.59229	10.3189	3.10199	0.0144133
Q9Y3A4	Ribosomal RNA-processing protein 7 homolog A OS=Homo sapiens GN=RRP7A PE=1 SV=2 - [RRP7A_HUMAN]	0	0	0	0	0	0.978129	0.967055	0	0.648395	0.561554	0.0917583
Q9Y3B9	RRP15-like protein OS=Homo sapiens GN=RRP15 PE=1 SV=2 - [RRP15_HUMAN]	0	0	0	0	0	0	0.967055	1.89807	0.955043	0.949094	0.111736
Q9Y3L3-2	Isoform 2 of SH3 domain-binding protein 1 OS=Homo sapiens GN=SH3BP1 - [3BP1_HUMAN]	0	0	0	0	0	2.93439	0.967055	0	1.30048	1.49534	0.135475
Q9Y3Z3-2	Isoform 2 of Deoxynucleoside triphosphate triphosphohydrolase SAMHD1 OS=Homo sapiens GN=SAMHD1 - [SAMH1_HUMAN]	0	0	0	0	0	36.1908	31.9128	0	22.7012	19.7758	0.0925548
Q9Y426-2	Isoform 2 of C2 domain-containing protein 2 OS=Homo sapiens GN=C2CD2 - [CU025_HUMAN]	0	0	0	0	0	0	0	0.949037	0.316346	0.547927	0.211325
Q9Y4L1	Hypoxia up-regulated protein 1 OS=Homo sapiens GN=HYOU1 PE=1 SV=1 - [HYOU1_HUMAN]	0	0	0	0	0	83.141	0	84.4643	55.8684	48.388	0.0917644
Q9Y4W2-3	Isoform 3 of Ribosomal biogenesis protein LAS1L OS=Homo sapiens GN=LAS1L - [LAS1L_HUMAN]	0	0	0	0	0	0	0	1.89807	0.632691	1.09585	0.211325
Q9Y570-3	Isoform 3 of Protein phosphatase methylesterase 1 OS=Homo sapiens GN=PPME1 - [PPME1_HUMAN]	0	0	0	0	0	0	0.967055	0	0.322352	0.55833	0.211325
Q9Y5B6-2	Isoform 2 of PAX3- and PAX7-binding protein 1 OS=Homo sapiens GN=PAXBP1 - [PAXB1_HUMAN]	0	0	0	0	0	3.91252	0.967055	0.949037	1.94287	1.70579	0.0936291
Q9Y5I2-3	Isoform 3 of Protocadherin alpha-10 OS=Homo sapiens GN=PCDHA10 - [PCDAA_HUMAN]	0	0	0	0	0	0	0.967055	0	0.322352	0.55833	0.211325
Q9Y5J1	U3 small nucleolar RNA-associated protein 18 homolog OS=Homo sapiens GN=UTP18 PE=1 SV=3 - [UTP18_HUMAN]	0	0	0	0	0	0.978129	0	0	0.326043	0.564723	0.211325
Q9Y5J5	Pleckstrin homology-like domain family A member 3 OS=Homo sapiens GN=PHLDA3 PE=1 SV=1 - [PHLA3_HUMAN]	0	0	0	0	0	0.978129	0	0	0.326043	0.564723	0.211325
Q9Y5Y5	Peroxisomal membrane protein PEX16 OS=Homo sapiens GN=PEX16 PE=1 SV=2 - [PEX16_HUMAN]	0	0	0	0	0	1.95626	0	0	0.652086	1.12945	0.211325
Q9Y608-2	Isoform 2 of Leucine-rich repeat flightless-interacting protein 2 OS=Homo sapiens GN=LRRFIP2 - [LRRF2_HUMAN]	0	0	0	0	0	4.89065	5.80233	0	3.56433	3.12027	0.0932275
Q9Y679-2	Isoform Short of Ancient ubiquitous protein 1 OS=Homo sapiens GN=AUP1 - [AUP1_HUMAN]	0	0	0	0	0	1.95626	0	0	0.652086	1.12945	0.211325
Q9Y6F6-6	Isoform 6 of Protein MRVI1 OS=Homo sapiens GN=MRVI1 - [MRVI1_HUMAN]	0	0	0	0	0	5.86877	4.83528	4.74518	5.14974	0.624325	0.00243176
Q9Y6I8	Peroxisomal membrane protein 4 OS=Homo sapiens GN=PXMP4 PE=1 SV=3 - [PXMP4_HUMAN]	0	0	0	0	0	0	0	0.949037	0.316346	0.547927	0.211325
Q9Y6M4-6	Isoform 6 of Casein kinase I isoform gamma-3 OS=Homo sapiens GN=CSNK1G3 - [KC1G3_HUMAN]	0	0	0	0	0	0	0	0.949037	0.316346	0.547927	0.211325
Q9Y6R1-3	Isoform 3 of Electrogenic sodium bicarbonate cotransporter 1 OS=Homo sapiens GN=SLC4A4 - [S4A4_HUMAN]	0	0	0	0	0	0.978129	0.967055	0	0.648395	0.561554	0.0917583
R4GMU7	60S ribosomal protein L7-like 1 OS=Homo sapiens GN=RPL7L1 PE=4 SV=1 - [R4GMU7_HUMAN]	0	0	0	0	0	0	0.967055	0	0.322352	0.55833	0.211325
R4GMW5	Motile sperm domain-containing protein 2 (Fragment) OS=Homo sapiens GN=MOSPD2 PE=4 SV=1 - [R4GMW5_HUMAN]	0	0	0	0	0	0	0.967055	0	0.322352	0.55833	0.211325
R4GMY8	Transcription elongation factor B polypeptide 1 OS=Homo sapiens GN=TCEB1 PE=4 SV=1 - [R4GMY8_HUMAN]	0	0	0	0	0	0.978129	0	0.949037	0.642389	0.556515	0.0917982
R4GN06	COMM domain-containing protein 3 (Fragment) OS=Homo sapiens GN=COMMD3 PE=4 SV=1 - [R4GN06_HUMAN]	0	0	0	0	0	0	0	0.949037	0.316346	0.547927	0.211325
R4GN36	Liprin-alpha-3 OS=Homo sapiens GN=PPFIA3 PE=4 SV=1 - [R4GN36_HUMAN]	0	0	0	0	0	0	0	0.949037	0.316346	0.547927	0.211325
R4GNF8	Mitochondrial enolase superfamily member 1 (Fragment) OS=Homo sapiens GN=ENOSF1 PE=4 SV=1 - [R4GNF8_HUMAN]	0	0	0	0	0	0.978129	0	0	0.326043	0.564723	0.211325
R4GNJ4	Insulin-like growth factor-binding protein 3 receptor (Fragment) OS=Homo sapiens GN=TMEM219 PE=4 SV=1 - [R4GNJ4_HUMAN]	0	0	0	0	0	0	0	0.949037	0.316346	0.547927	0.211325
P35442	Thrombospondin-2 OS=Homo sapiens GN=THBS2 PE=1 SV=2 - [TSP2_HUMAN]	0	1.88324	0	0.627746	1.08729	40.1033	34.814	33.2163	36.0445	3.60463	0.00217713
Q9BZQ8	Protein Niban OS=Homo sapiens GN=FAM129A PE=1 SV=1 - [NIBAN_HUMAN]	1	0	0	0.333333	0.57735	11.7375	14.5058	7.59229	11.2786	3.47955	0.0158794
B4DIT7	Protein-glutamine gamma-glutamyltransferase 2 OS=Homo sapiens GN=TGM2 PE=2 SV=1 - [B4DIT7_HUMAN]	0	1.88324	0.980777	0.954672	0.941891	24.4532	25.1434	33.2163	27.6043	4.87234	0.00548367
Q8WU39	Marginal zone B- and B1-cell-specific protein OS=Homo sapiens GN=MZB1 PE=1 SV=1 - [MZB1_HUMAN]	0	0	0.980777	0.326926	0.566252	9.78129	8.7035	8.54133	9.00871	0.673973	0.00270492
P00736	Complement C1r subcomponent OS=Homo sapiens GN=C1R PE=1 SV=2 - [C1R_HUMAN]	0	0	0.980777	0.326926	0.566252	8.80316	7.73644	10.4394	8.993	1.36144	0.00166841
Q13247-3	Isoform SRP55-3 of Serine/arginine-rich splicing factor 6 OS=Homo sapiens GN=SRSF6 - [SRSF6_HUMAN]	0	0.94162	0	0.313873	0.543644	9.78129	7.73644	7.59229	8.37001	1.22433	0.00602952
Q06828	Fibromodulin OS=Homo sapiens GN=FMOD PE=1 SV=2 - [FMOD_HUMAN]	1	0	0	0.333333	0.57735	5.86877	7.73644	6.64326	6.74949	0.938355	0.00827011
Q14392	Leucine-rich repeat-containing protein 32 OS=Homo sapiens GN=LRRC32 PE=1 SV=1 - [LRC32_HUMAN]	1	0	0	0.333333	0.57735	8.80316	6.76939	3.79615	6.45623	2.51815	0.0181949
P02747	Complement C1q subcomponent subunit C OS=Homo sapiens GN=C1QC PE=1 SV=3 - [C1QC_HUMAN]	0	0.94162	0.980777	0.640799	0.555293	11.7375	12.5717	9.49037	11.2665	1.59376	0.00488937
Q14151	Scaffold attachment factor B2 OS=Homo sapiens GN=SAFB2 PE=1 SV=1 - [SAFB2_HUMAN]	0	0	1.96155	0.653851	1.1325	11.7375	7.73644	11.3884	10.2875	2.21615	0.00709117
E7EUU1	Latent-transforming growth factor beta-binding protein 4 OS=Homo sapiens GN=LTBP4 PE=2 SV=1 - [E7EUU1_HUMAN]	0	0	1.96155	0.653851	1.1325	10.7594	6.76939	13.2865	10.2718	3.28582	0.0107516
Q53TN4-3	Isoform 3 of Cytochrome b reductase 1 OS=Homo sapiens GN=CYBRD1 - [CYBR1_HUMAN]	0	0.94162	0	0.313873	0.543644	6.8469	2.90117	4.74518	4.83108	1.97427	0.0428732
A2BF36	HLA class II histocompatibility antigen, DQ beta 1 chain OS=Homo sapiens GN=HLA-DQB1 PE=2 SV=1 - [A2BF36_HUMAN]	0	1.88324	0	0.627746	1.08729	9.78129	8.7035	9.49037	9.32505	0.557589	0.00576752
Q13151	Heterogeneous nuclear ribonucleoprotein A0 OS=Homo sapiens GN=HNRNPA0 PE=1 SV=1 - [ROA0_HUMAN]	0	0	0.980777	0.326926	0.566252	3.91252	4.83528	4.74518	4.49766	0.508747	0.00319511
E7EQT4	Apoptotic chromatin condensation inducer in the nucleus OS=Homo sapiens GN=ACIN1 PE=2 SV=2 - [E7EQT4_HUMAN]	0	0	0.980777	0.326926	0.566252	0	4.83528	8.54133	4.45887	4.28309	0.101274
O15460-2	Isoform IIa of Prolyl 4-hydroxylase subunit alpha-2 OS=Homo sapiens GN=P4HA2 - [P4HA2_HUMAN]	0	0.94162	0.980777	0.640799	0.555293	9.78129	6.76939	9.49037	8.68035	1.66132	0.0101836
Q14554	Protein disulfide-isomerase A5 OS=Homo sapiens GN=PDIA5 PE=1 SV=1 - [PDIA5_HUMAN]	1	0.94162	0	0.647207	0.561257	8.80316	8.7035	7.59229	8.36632	0.672174	3.49272e-05
Q8TED1	Probable glutathione peroxidase 8 OS=Homo sapiens GN=GPX8 PE=1 SV=2 - [GPX8_HUMAN]	2	0	0	0.666667	1.1547	8.80316	7.73644	8.54133	8.36031	0.555921	0.00211706
Q29RF7	Sister chromatid cohesion protein PDS5 homolog A OS=Homo sapiens GN=PDS5A PE=1 SV=1 - [PDS5A_HUMAN]	2	0	0	0.666667	1.1547	6.8469	10.6376	5.69422	7.72624	2.58635	0.0298145
K7EMV3	Histone H3 OS=Homo sapiens GN=H3F3B PE=3 SV=1 - [K7EMV3_HUMAN]	0	0	1.96155	0.653851	1.1325	10.7594	0	11.3884	7.38262	6.40127	0.0926383
P04275	von Willebrand factor OS=Homo sapiens GN=VWF PE=1 SV=4 - [VWF_HUMAN]	4	0	0.980777	1.66026	2.08477	20.5407	18.3741	17.0827	18.6658	1.74739	0.000835154
Q96CG1	ETF1 protein OS=Homo sapiens GN=ETF1 PE=2 SV=1 - [Q96CG1_HUMAN]	0	0.94162	0	0.313873	0.543644	2.93439	1.93411	5.69422	3.52091	1.94746	0.0715433
E9PP21	Cysteine and glycine-rich protein 1 OS=Homo sapiens GN=CSRP1 PE=2 SV=1 - [E9PP21_HUMAN]	0	5.64972	0	1.88324	3.26187	19.5626	22.2423	20.8788	20.8946	1.33992	0.00220836
Q13683-9	Isoform Alpha-7X2DB of Integrin alpha-7 OS=Homo sapiens GN=ITGA7 - [ITA7_HUMAN]	3	0	0	1	1.73205	11.7375	9.67055	11.3884	10.9322	1.10646	0.00302715
Q16643	Drebrin OS=Homo sapiens GN=DBN1 PE=1 SV=4 - [DREB_HUMAN]	0	0	4.90388	1.63463	2.83126	16.6282	20.3082	16.1336	17.69	2.28085	0.0129593
P17948-2	Isoform 2 of Vascular endothelial growth factor receptor 1 OS=Homo sapiens GN=FLT1 - [VGFR1_HUMAN]	0	0	0.980777	0.326926	0.566252	0	6.76939	3.79615	3.52184	3.39302	0.122604
Q9UMS6	Synaptopodin-2 OS=Homo sapiens GN=SYNPO2 PE=1 SV=2 - [SYNP2_HUMAN]	1	0	2.94233	1.31411	1.4961	0	0	41.7576	13.9192	24.1088	0.218855
P13611-5	Isoform Vint of Versican core protein OS=Homo sapiens GN=VCAN - [CSPG2_HUMAN]	25	0	0	8.33333	14.4338	92.9223	88.002	82.5662	87.8302	5.18017	0.00282061
B7Z2R9	Lysosome-associated membrane glycoprotein 2 OS=Homo sapiens GN=LAMP2 PE=2 SV=1 - [B7Z2R9_HUMAN]	0	0	1.96155	0.653851	1.1325	4.89065	9.67055	5.69422	6.75181	2.55944	0.0392499
Q8NBJ5	Procollagen galactosyltransferase 1 OS=Homo sapiens GN=COLGALT1 PE=1 SV=1 - [GT251_HUMAN]	0	0.94162	0	0.313873	0.543644	3.91252	3.86822	1.89807	3.22627	1.15047	0.0188187
Q96CS3	FAS-associated factor 2 OS=Homo sapiens GN=FAF2 PE=1 SV=2 - [FAF2_HUMAN]	0	0.94162	0	0.313873	0.543644	3.91252	2.90117	2.84711	3.22026	0.600117	0.0178609
P49961-5	Isoform 5 of Ectonucleoside triphosphate diphosphohydrolase 1 OS=Homo sapiens GN=ENTPD1 - [ENTP1_HUMAN]	7	0	0	2.33333	4.04145	25.4314	21.2752	21.8278	22.8448	2.257	0.00131063
Q01813	6-phosphofructokinase type C OS=Homo sapiens GN=PFKP PE=1 SV=2 - [K6PP_HUMAN]	3	2.82486	0	1.94162	1.68377	22.497	17.407	17.0827	18.9955	3.03666	0.00342548
O96019	Actin-like protein 6A OS=Homo sapiens GN=ACTL6A PE=1 SV=1 - [ACL6A_HUMAN]	2	0	0	0.666667	1.1547	4.89065	7.73644	6.64326	6.42345	1.43558	0.0296287
Q70UQ0	Inhibitor of nuclear factor kappa-B kinase-interacting protein OS=Homo sapiens GN=IKBIP PE=1 SV=1 - [IKIP_HUMAN]	3	3.76648	0	2.25549	1.99055	23.4751	19.3411	21.8278	21.548	2.08115	0.00477772
P16615-2	Isoform 2 of Sarcoplasmic/endoplasmic reticulum calcium ATPase 2 OS=Homo sapiens GN=ATP2A2 - [AT2A2_HUMAN]	0	0	1.96155	0.653851	1.1325	6.8469	6.76939	4.74518	6.12049	1.19168	0.0276444
P23219-3	Isoform 3 of Prostaglandin G/H synthase 1 OS=Homo sapiens GN=PTGS1 - [PGH1_HUMAN]	0	0.94162	0	0.313873	0.543644	4.89065	1.93411	1.89807	2.90761	1.71745	0.0792856
C9JM82	Septin-5 OS=Homo sapiens GN=SEPT5 PE=3 SV=1 - [C9JM82_HUMAN]	0	0.94162	0	0.313873	0.543644	2.93439	2.90117	2.84711	2.89422	0.044051	0.00712765
H7C285	Tetraspanin-15 (Fragment) OS=Homo sapiens GN=TSPAN15 PE=2 SV=1 - [H7C285_HUMAN]	0	0.94162	0	0.313873	0.543644	2.93439	0.967055	4.74518	2.88221	1.8896	0.101336
Q12965	Unconventional myosin-Ie OS=Homo sapiens GN=MYO1E PE=1 SV=2 - [MYO1E_HUMAN]	0	0	0.980777	0.326926	0.566252	2.93439	2.90117	2.84711	2.89422	0.044051	0.00907246
F2Z2V0	Copine-1 (Fragment) OS=Homo sapiens GN=CPNE1 PE=2 SV=1 - [F2Z2V0_HUMAN]	0	1.88324	0	0.627746	1.08729	6.8469	2.90117	6.64326	5.46378	2.22162	0.0634744
P51911	Calponin-1 OS=Homo sapiens GN=CNN1 PE=1 SV=2 - [CNN1_HUMAN]	14	9.4162	0	7.8054	7.13765	68.469	69.628	65.4835	67.8602	2.13826	0.00139658
O15540	Fatty acid-binding protein, brain OS=Homo sapiens GN=FABP7 PE=1 SV=3 - [FABP7_HUMAN]	3	0.94162	1.96155	1.96772	1.0292	15.6501	19.3411	16.1336	17.0416	2.00606	0.00638459
C9JKG1	Biglycan (Fragment) OS=Homo sapiens GN=BGN PE=2 SV=1 - [C9JKG1_HUMAN]	16	0	0	5.33333	9.2376	40.1033	49.3198	47.4518	45.625	4.87228	0.0191133
Q9NTI5-2	Isoform 2 of Sister chromatid cohesion protein PDS5 homolog B OS=Homo sapiens GN=PDS5B - [PDS5B_HUMAN]	2	0	0.980777	0.993592	1.00006	6.8469	9.67055	8.54133	8.35293	1.42122	0.0170773
P23142-4	Isoform C of Fibulin-1 OS=Homo sapiens GN=FBLN1 - [FBLN1_HUMAN]	0	0	5.88466	1.96155	3.39751	17.6063	17.407	14.2356	16.4163	1.8912	0.0209086
P46821	Microtubule-associated protein 1B OS=Homo sapiens GN=MAP1B PE=1 SV=2 - [MAP1B_HUMAN]	3	3.76648	3.92311	3.5632	0.493989	26.4095	29.0117	32.2672	29.2295	2.93495	0.00156645
Q96F15	GTPase IMAP family member 5 OS=Homo sapiens GN=GIMAP5 PE=1 SV=1 - [GIMA5_HUMAN]	0	0.94162	0	0.313873	0.543644	2.93439	1.93411	2.84711	2.57187	0.554036	0.0352212
Q92572	AP-3 complex subunit sigma-1 OS=Homo sapiens GN=AP3S1 PE=1 SV=1 - [AP3S1_HUMAN]	0	0.94162	0	0.313873	0.543644	0.978129	3.86822	2.84711	2.56449	1.46563	0.0357703
Q8WTV0-4	Isoform 4 of Scavenger receptor class B member 1 OS=Homo sapiens GN=SCARB1 - [SCRB1_HUMAN]	2	0	0	0.666667	1.1547	3.91252	3.86822	8.54133	5.44069	2.68533	0.0679578
R4GMN9	Neural cell adhesion molecule 1 OS=Homo sapiens GN=NCAM1 PE=4 SV=1 - [R4GMN9_HUMAN]	1	0.94162	0.980777	0.974132	0.029752	7.82503	6.76939	8.54133	7.71192	0.891371	0.00275382
F8W7T0	Testin (Fragment) OS=Homo sapiens GN=TES PE=2 SV=1 - [F8W7T0_HUMAN]	0	0	0.980777	0.326926	0.566252	4.89065	0.967055	1.89807	2.58526	2.05007	0.114172
Q53GS9-2	Isoform 2 of U4/U6.U5 tri-snRNP-associated protein 2 OS=Homo sapiens GN=USP39 - [SNUT2_HUMAN]	0	0	0.980777	0.326926	0.566252	4.89065	0.967055	1.89807	2.58526	2.05007	0.114172
P00747	Plasminogen OS=Homo sapiens GN=PLG PE=1 SV=2 - [PLMN_HUMAN]	0	0	0.980777	0.326926	0.566252	3.91252	0	3.79615	2.56955	2.22606	0.0970741
O95302	Peptidyl-prolyl cis-trans isomerase FKBP9 OS=Homo sapiens GN=FKBP9 PE=1 SV=2 - [FKBP9_HUMAN]	0	0	0.980777	0.326926	0.566252	0.978129	3.86822	2.84711	2.56449	1.46563	0.0600834
P78540	Arginase-2, mitochondrial OS=Homo sapiens GN=ARG2 PE=1 SV=1 - [ARGI2_HUMAN]	5	5.64972	4.90388	5.18453	0.405717	39.1252	40.6163	40.8086	40.1834	0.92145	0.000107791
F8W038	Chromatin complexes subunit BAP18 OS=Homo sapiens GN=C17orf49 PE=2 SV=1 - [F8W038_HUMAN]	2	0	0	0.666667	1.1547	4.89065	3.86822	6.64326	5.13404	1.40344	0.0289293
Q96A33-2	Isoform 2 of Coiled-coil domain-containing protein 47 OS=Homo sapiens GN=CCDC47 - [CCD47_HUMAN]	0	1.88324	0	0.627746	1.08729	7.82503	0	6.64326	4.82276	4.21823	0.15188
P07948-2	Isoform 2 of Tyrosine-protein kinase Lyn OS=Homo sapiens GN=LYN - [LYN_HUMAN]	1	0	0	0.333333	0.57735	0	3.86822	3.79615	2.55479	2.21281	0.150925
Q9UIG0-2	Isoform 2 of Tyrosine-protein kinase BAZ1B OS=Homo sapiens GN=BAZ1B - [BAZ1B_HUMAN]	0	0.94162	0.980777	0.640799	0.555293	3.91252	5.80233	4.74518	4.82001	0.947127	0.00334246
Q7Z7G0	Target of Nesh-SH3 OS=Homo sapiens GN=ABI3BP PE=1 SV=1 - [TARSH_HUMAN]	0	2.82486	0	0.94162	1.63093	5.86877	6.76939	8.54133	7.05983	1.35975	0.0221628
P55265-5	Isoform 5 of Double-stranded RNA-specific adenosine deaminase OS=Homo sapiens GN=ADAR - [DSRAD_HUMAN]	1	0.94162	1.96155	1.30106	0.57275	7.82503	10.6376	10.4394	9.63401	1.56976	0.00491038
[truncated: 5,509 more rows]

## Sheet: Supplementary Table S2
Supplementary Table S2. ccRCC-Mediated Proteins
		Spectral Counts of Adjacent Tissues					Spectral Counts of Tumor Tissues (ccRCC)
Accession	Description	Exp1	Exp2	Exp3	Average	SD	Exp1	Exp2	Exp3	Average	SD	t-test	Ratio T/A
Q09666	Neuroblast differentiation-associated protein AHNAK OS=Homo sapiens GN=AHNAK PE=1 SV=2 - [AHNK_HUMAN]	177	177.024	193.213	182.413	9.35353	638.718	660.499	658.631	652.616	12.0721	0.000102117	3.57769
P62805	Histone H4 OS=Homo sapiens GN=HIST1H4A PE=1 SV=2 - [H4_HUMAN]	148	157.25	147.117	150.789	5.61321	474.393	428.406	509.633	470.81	40.7319	0.00341023	3.12231
P50454	Serpin H1 OS=Homo sapiens GN=SERPINH1 PE=1 SV=2 - [SERPH_HUMAN]	21	22.5989	21.5771	21.7253	0.809676	68.469	65.7598	68.3306	67.5198	1.52582	0.000423046	3.10789
F8W7G7	Ugl-Y3 OS=Homo sapiens GN=FN1 PE=2 SV=1 - [F8W7G7_HUMAN]	37	41.4313	47.0773	41.8362	5.05083	126.179	122.816	124.324	124.439	1.68429	0.000894216	2.97445
P43121	Cell surface glycoprotein MUC18 OS=Homo sapiens GN=MCAM PE=1 SV=2 - [MUC18_HUMAN]	24	20.7156	22.5579	22.4245	1.64624	67.4909	62.8586	62.6364	64.3286	2.74085	0.000280125	2.86868
Q9BX66-9	Isoform 9 of Sorbin and SH3 domain-containing protein 1 OS=Homo sapiens GN=SORBS1 - [SRBS1_HUMAN]	29	26.3653	28.4425	27.936	1.38845	80.2066	82.1997	74.9739	79.1267	3.73197	0.00137046	2.83243
P41219	Peripherin OS=Homo sapiens GN=PRPH PE=1 SV=2 - [PERI_HUMAN]	30	21.6573	24.5194	25.3922	4.23931	67.4909	70.595	74.9739	71.0199	3.75955	0.0039734	2.79692
A8MVZ9	Fructose-bisphosphate aldolase OS=Homo sapiens GN=ALDOC PE=2 SV=1 - [A8MVZ9_HUMAN]	24	21.6573	24.5194	23.3922	1.52481	61.6221	63.8257	69.2797	64.9092	3.94208	0.00125772	2.77482
Q6NZI2	Polymerase I and transcript release factor OS=Homo sapiens GN=PTRF PE=1 SV=1 - [PTRF_HUMAN]	17	22.5989	21.5771	20.392	2.98164	45.9721	57.0563	57.8912	53.6399	6.65361	0.00218294	2.63044
P08670	Vimentin OS=Homo sapiens GN=VIM PE=1 SV=4 - [VIME_HUMAN]	282	272.128	257.944	270.691	12.0921	715.99	703.049	679.51	699.517	18.4949	3.79568e-05	2.58419
J3QRK5	Protein UBBP4 OS=Homo sapiens GN=UBBP4 PE=4 SV=1 - [J3QRK5_HUMAN]	32	35.7815	40.2118	35.9978	4.11019	88.0316	88.9691	95.8527	90.9511	4.27069	0.000131118	2.52658
Q14847	LIM and SH3 domain protein 1 OS=Homo sapiens GN=LASP1 PE=1 SV=2 - [LASP1_HUMAN]	24	23.5405	22.5579	23.3661	0.73671	52.819	63.8257	56.9422	57.8623	5.56073	0.00454214	2.47633
P55290	Cadherin-13 OS=Homo sapiens GN=CDH13 PE=1 SV=1 - [CAD13_HUMAN]	25	16.9492	20.5963	20.8485	4.03134	49.8846	52.221	47.4518	49.8525	2.38474	0.00592305	2.39118
Q07960	Rho GTPase-activating protein 1 OS=Homo sapiens GN=ARHGAP1 PE=1 SV=1 - [RHG01_HUMAN]	25	18.8324	19.6155	21.1493	3.35771	46.9502	48.3528	55.9932	50.432	4.86687	0.00982533	2.38457
Q92626	Peroxidasin homolog OS=Homo sapiens GN=PXDN PE=1 SV=2 - [PXDN_HUMAN]	21	21.6573	18.6348	20.4307	1.58964	45.9721	57.0563	38.9105	47.3129	9.14689	0.0132706	2.31578
P14618	Pyruvate kinase isozymes M1/M2 OS=Homo sapiens GN=PKM PE=1 SV=4 - [KPYM_HUMAN]	45	42.3729	36.2887	41.2205	4.46849	102.704	90.9032	92.0566	95.2211	6.5056	0.00133091	2.31004
A6NLG9	Biglycan OS=Homo sapiens GN=BGN PE=2 SV=1 - [A6NLG9_HUMAN]	55	43.3145	51.9812	50.0986	6.06596	110.529	117.014	116.732	114.758	3.66544	0.00325864	2.29064
P02679-2	Isoform Gamma-A of Fibrinogen gamma chain OS=Homo sapiens GN=FGG - [FIBG_HUMAN]	24	23.5405	25.5002	24.3469	1.02487	57.7096	44.4845	64.5345	55.5762	10.1938	0.0141461	2.28268
P23246	Splicing factor, proline- and glutamine-rich OS=Homo sapiens GN=SFPQ PE=1 SV=2 - [SFPQ_HUMAN]	26	20.7156	19.6155	22.1104	3.41312	46.9502	46.4187	50.2989	47.8893	2.1037	0.00583708	2.16592
P02675	Fibrinogen beta chain OS=Homo sapiens GN=FGB PE=1 SV=2 - [FIBB_HUMAN]	38	32.0151	37.2695	35.7615	3.26502	73.3597	74.4633	84.4643	77.4291	6.1176	0.00337099	2.16515
P07996	Thrombospondin-1 OS=Homo sapiens GN=THBS1 PE=1 SV=2 - [TSP1_HUMAN]	28	27.307	34.3272	29.8781	3.86861	52.819	70.595	68.3306	63.9149	9.67581	0.0118345	2.13919
P12109	Collagen alpha-1(VI) chain OS=Homo sapiens GN=COL6A1 PE=1 SV=3 - [CO6A1_HUMAN]	39	37.6648	41.1926	39.2858	1.7812	82.1628	84.1338	85.4133	83.9033	1.63745	0.000238506	2.13572
P12110	Collagen alpha-2(VI) chain OS=Homo sapiens GN=COL6A2 PE=1 SV=4 - [CO6A2_HUMAN]	35	32.9567	27.4617	31.8061	3.8986	63.5784	65.7598	74.0249	67.7877	5.51058	0.0110104	2.13128
G8JLA8	Transforming growth factor-beta-induced protein ig-h3 OS=Homo sapiens GN=TGFBI PE=2 SV=1 - [G8JLA8_HUMAN]	53	40.4896	52.9619	48.8172	7.2119	104.66	98.6396	107.241	103.514	4.41383	0.000592876	2.12043
P20700	Lamin-B1 OS=Homo sapiens GN=LMNB1 PE=1 SV=2 - [LMNB1_HUMAN]	64	63.0885	57.8658	61.6514	3.30997	126.179	128.618	130.967	128.588	2.39436	0.00116062	2.08573
P0C0S5	Histone H2A.Z OS=Homo sapiens GN=H2AFZ PE=1 SV=2 - [H2AZ_HUMAN]	23	36.7232	29.4233	29.7155	6.86625	68.469	55.1222	59.7893	61.1268	6.77322	0.028456	2.05707
P00338	L-lactate dehydrogenase A chain OS=Homo sapiens GN=LDHA PE=1 SV=2 - [LDHA_HUMAN]	50	52.7307	56.8851	53.2052	3.46697	111.507	106.376	100.598	106.16	5.45761	0.00465981	1.9953
P04075	Fructose-bisphosphate aldolase A OS=Homo sapiens GN=ALDOA PE=1 SV=2 - [ALDOA_HUMAN]	37	39.548	37.2695	37.9392	1.3998	77.2722	78.3315	70.2287	75.2775	4.40431	0.00177609	1.98416
P17661	Desmin OS=Homo sapiens GN=DES PE=1 SV=3 - [DESM_HUMAN]	58	47.081	53.9427	53.0079	5.51921	95.8566	112.178	105.343	104.459	8.19669	0.0112859	1.97064
P13796	Plastin-2 OS=Homo sapiens GN=LCP1 PE=1 SV=6 - [PLSL_HUMAN]	27	24.4821	27.4617	26.3146	1.60371	50.8627	49.3198	53.1461	51.1095	1.92502	0.000225109	1.94225
Q92597	Protein NDRG1 OS=Homo sapiens GN=NDRG1 PE=1 SV=1 - [NDRG1_HUMAN]	43	42.3729	39.2311	41.5347	2.01945	88.0316	79.2985	74.0249	80.4517	7.07422	0.00318022	1.93698
F8W181	60S ribosomal protein L6 (Fragment) OS=Homo sapiens GN=RPL6 PE=2 SV=1 - [F8W181_HUMAN]	20	20.7156	22.5579	21.0912	1.31964	41.0814	41.5834	39.8595	40.8414	0.886619	0.00191514	1.93642
Q05707-2	Isoform 2 of Collagen alpha-1(XIV) chain OS=Homo sapiens GN=COL14A1 - [COEA1_HUMAN]	107	104.52	99.0585	103.526	4.06296	189.757	202.115	205.941	199.271	8.45843	0.00267064	1.92484
P04792	Heat shock protein beta-1 OS=Homo sapiens GN=HSPB1 PE=1 SV=2 - [HSPB1_HUMAN]	63	58.3804	51.9812	57.7872	5.53332	107.594	104.442	120.528	110.855	8.52409	0.0103374	1.91832
Q14315-2	Isoform 2 of Filamin-C OS=Homo sapiens GN=FLNC - [FLNC_HUMAN]	41	43.3145	35.308	39.8742	4.12029	71.4034	74.4633	76.872	74.2462	2.74073	0.0054033	1.86201
P12111-2	Isoform 2 of Collagen alpha-3(VI) chain OS=Homo sapiens GN=COL6A3 - [CO6A3_HUMAN]	176	190.207	192.232	186.146	8.84525	346.258	347.173	341.653	345.028	2.95818	0.000733197	1.85353
P04083	Annexin A1 OS=Homo sapiens GN=ANXA1 PE=1 SV=2 - [ANXA1_HUMAN]	50	59.322	52.9619	54.0947	4.76313	96.8348	102.508	97.7508	99.0311	3.04557	0.000275863	1.8307
Q12906-5	Isoform 5 of Interleukin enhancer-binding factor 3 OS=Homo sapiens GN=ILF3 - [ILF3_HUMAN]	22	21.6573	24.5194	22.7256	1.56295	36.1908	44.4845	40.8086	40.4946	4.15579	0.010378	1.7819
P37235	Hippocalcin-like protein 1 OS=Homo sapiens GN=HPCAL1 PE=1 SV=3 - [HPCL1_HUMAN]	19	20.7156	28.4425	22.7194	5.03007	38.147	40.6163	41.7576	40.1737	1.84555	0.00695932	1.76825
P07942	Laminin subunit beta-1 OS=Homo sapiens GN=LAMB1 PE=1 SV=2 - [LAMB1_HUMAN]	40	30.1318	37.2695	35.8004	5.09547	58.6877	58.0233	72.1268	62.946	7.95778	0.0142455	1.75824
O60814	Histone H2B type 1-K OS=Homo sapiens GN=HIST1H2BK PE=1 SV=3 - [H2B1K_HUMAN]	38	46.1394	37.2695	40.4696	4.9237	68.469	68.6609	75.9229	71.0176	4.2492	0.0112304	1.75484
Q14112-2	Isoform 2 of Nidogen-2 OS=Homo sapiens GN=NID2 - [NID2_HUMAN]	35	32.9567	34.3272	34.0946	1.04132	61.6221	58.0233	57.8912	59.1789	2.11693	0.000618187	1.73573
Q15149-3	Isoform 3 of Plectin OS=Homo sapiens GN=PLEC - [PLEC_HUMAN]	265	263.653	277.56	268.738	7.66973	462.655	487.396	444.149	464.733	21.6981	0.00351458	1.72932
P67936	Tropomyosin alpha-4 chain OS=Homo sapiens GN=TPM4 PE=1 SV=3 - [TPM4_HUMAN]	119	108.286	110.828	112.705	5.59805	194.648	204.049	182.215	193.637	10.9518	0.00425752	1.71809
Q9Y4G6	Talin-2 OS=Homo sapiens GN=TLN2 PE=1 SV=4 - [TLN2_HUMAN]	55	45.1977	47.0773	49.0917	5.20235	88.0316	84.1338	79.7191	83.9615	4.15894	0.00169633	1.7103
P35579	Myosin-9 OS=Homo sapiens GN=MYH9 PE=1 SV=4 - [MYH9_HUMAN]	307	309.793	306.983	307.925	1.61734	538.949	528.979	490.652	519.527	25.4983	0.00231361	1.68718
P62736	Actin, aortic smooth muscle OS=Homo sapiens GN=ACTA2 PE=1 SV=1 - [ACTA_HUMAN]	622	575.33	577.678	591.669	26.2936	989.867	968.989	1033.5	997.452	32.918	0.00205649	1.68583
Q7Z406	Myosin-14 OS=Homo sapiens GN=MYH14 PE=1 SV=2 - [MYH14_HUMAN]	37	32.9567	31.3849	33.7805	2.8968	65.5346	55.1222	47.4518	56.0362	9.07599	0.0125864	1.65883
P05534	HLA class I histocompatibility antigen, A-24 alpha chain OS=Homo sapiens GN=HLA-A PE=1 SV=2 - [1A24_HUMAN]	55	49.9058	42.1734	49.0264	6.45836	67.4909	87.035	89.2095	81.2451	11.961	0.0441756	1.65717
F8W1R7	Myosin light polypeptide 6 OS=Homo sapiens GN=MYL6 PE=2 SV=1 - [F8W1R7_HUMAN]	75	81.9209	74.539	77.1533	4.13528	130.091	117.014	134.763	127.289	9.20049	0.0112958	1.64982
Q16181	Septin-7 OS=Homo sapiens GN=SEPT7 PE=1 SV=2 - [SEPT7_HUMAN]	25	22.5989	27.4617	25.0202	2.4315	38.147	41.5834	43.6557	41.1287	2.78233	0.00538698	1.64382
P02452	Collagen alpha-1(I) chain OS=Homo sapiens GN=COL1A1 PE=1 SV=5 - [CO1A1_HUMAN]	30	34.8399	33.3464	32.7288	2.47837	57.7096	55.1222	48.4009	53.7442	4.80491	0.0145965	1.64211
P07237	Protein disulfide-isomerase OS=Homo sapiens GN=P4HB PE=1 SV=3 - [PDIA1_HUMAN]	88	74.3879	77.4814	79.9564	7.13558	135.96	128.618	129.069	131.216	4.11475	0.000627455	1.64109
Q01995	Transgelin OS=Homo sapiens GN=TAGLN PE=1 SV=4 - [TAGL_HUMAN]	106	108.286	102.001	105.429	3.1814	177.041	166.334	172.725	172.033	5.38731	0.00205145	1.63174
P68133	Actin, alpha skeletal muscle OS=Homo sapiens GN=ACTA1 PE=1 SV=1 - [ACTS_HUMAN]	669	630.885	645.351	648.412	19.2409	1047.58	1023.14	1089.49	1053.4	33.5567	0.00121125	1.62459
Q9UQE7	Structural maintenance of chromosomes protein 3 OS=Homo sapiens GN=SMC3 PE=1 SV=2 - [SMC3_HUMAN]	33	32.9567	34.3272	33.428	0.779057	47.9283	52.221	62.6364	54.2619	7.56347	0.0169902	1.62325
P46940	Ras GTPase-activating-like protein IQGAP1 OS=Homo sapiens GN=IQGAP1 PE=1 SV=1 - [IQGA1_HUMAN]	67	52.7307	59.8274	59.8527	7.13469	94.8785	101.541	93.9546	96.7913	4.13904	0.0135334	1.61716
P07951	Tropomyosin beta chain OS=Homo sapiens GN=TPM2 PE=1 SV=1 - [TPM2_HUMAN]	94	86.629	88.2699	89.633	3.86993	147.697	151.828	134.763	144.763	8.90272	0.00481081	1.61506
Q8IUX7	Adipocyte enhancer-binding protein 1 OS=Homo sapiens GN=AEBP1 PE=1 SV=1 - [AEBP1_HUMAN]	48	48.0226	44.135	46.7192	2.23804	63.5784	82.1997	79.7191	75.1657	10.1113	0.0238578	1.60888
P39059	Collagen alpha-1(XV) chain OS=Homo sapiens GN=COL15A1 PE=1 SV=2 - [COFA1_HUMAN]	34	34.8399	33.3464	34.0621	0.748692	57.7096	52.221	54.0951	54.6752	2.78992	0.00388705	1.60516
B4DXW1	Actin-related protein 3 OS=Homo sapiens GN=ACTR3 PE=2 SV=1 - [B4DXW1_HUMAN]	22	26.3653	25.5002	24.6218	2.31143	39.1252	37.7152	40.8086	39.2163	1.54872	0.00668737	1.59274
P40121	Macrophage-capping protein OS=Homo sapiens GN=CAPG PE=1 SV=2 - [CAPG_HUMAN]	31	38.6064	37.2695	35.6253	4.06102	52.819	58.0233	58.8403	56.5609	3.26621	0.000662266	1.58766
A9R9N8	HLA class I histocompatibility antigen, A-68 alpha chain OS=Homo sapiens GN=HLA-A PE=2 SV=1 - [A9R9N8_HUMAN]	44	29.1902	33.3464	35.5122	7.63875	56.7315	59.9574	51.248	55.979	4.40322	0.0311473	1.57633
Q07065	Cytoskeleton-associated protein 4 OS=Homo sapiens GN=CKAP4 PE=1 SV=2 - [CKAP4_HUMAN]	31	46.1394	41.1926	39.444	7.71967	62.6003	59.9574	63.5855	62.0477	1.87607	0.0239587	1.57306
P24844	Myosin regulatory light polypeptide 9 OS=Homo sapiens GN=MYL9 PE=1 SV=4 - [MYL9_HUMAN]	73	78.1544	67.6736	72.9427	5.24065	115.419	104.442	123.375	114.412	9.5065	0.0197877	1.56852
H7BZJ3	Thioredoxin (Fragment) OS=Homo sapiens GN=PDIA3 PE=2 SV=1 - [H7BZJ3_HUMAN]	43	39.548	42.1734	41.5738	1.80241	58.6877	71.5621	64.5345	64.9281	6.4462	0.0193984	1.56176
P16403	Histone H1.2 OS=Homo sapiens GN=HIST1H1C PE=1 SV=2 - [H12_HUMAN]	70	70.6215	66.6928	69.1048	2.11179	110.529	91.8703	119.579	107.326	14.1291	0.0267015	1.55309
Q03252	Lamin-B2 OS=Homo sapiens GN=LMNB2 PE=1 SV=3 - [LMNB2_HUMAN]	73	79.096	82.3852	78.1604	4.76206	122.266	121.849	114.833	119.65	4.17605	0.00682032	1.53082
P60709	Actin, cytoplasmic 1 OS=Homo sapiens GN=ACTB PE=1 SV=1 - [ACTB_HUMAN]	679	658.192	680.659	672.617	12.5199	1038.77	983.495	1060.07	1027.45	39.5257	0.000990319	1.52754
P00558	Phosphoglycerate kinase 1 OS=Homo sapiens GN=PGK1 PE=1 SV=3 - [PGK1_HUMAN]	130	126.177	143.193	133.123	8.92785	187.801	211.785	205.941	201.842	12.5065	0.00759012	1.5162
P13667	Protein disulfide-isomerase A4 OS=Homo sapiens GN=PDIA4 PE=1 SV=2 - [PDIA4_HUMAN]	87	82.8625	77.4814	82.448	4.77284	123.244	127.651	122.426	124.44	2.81065	0.00232648	1.50932
Q07955	Serine/arginine-rich splicing factor 1 OS=Homo sapiens GN=SRSF1 PE=1 SV=2 - [SRSF1_HUMAN]	36	34.8399	36.2887	35.7096	0.766835	58.6877	48.3528	54.0951	53.7119	5.17813	0.0104974	1.50413
P00387-2	Isoform 2 of NADH-cytochrome b5 reductase 3 OS=Homo sapiens GN=CYB5R3 - [NB5R3_HUMAN]	45	48.0226	53.9427	48.9884	4.54892	73.3597	74.4633	71.1778	73.0002	1.67199	0.0099194	1.49015
P37802	Transgelin-2 OS=Homo sapiens GN=TAGLN2 PE=1 SV=3 - [TAGL2_HUMAN]	49	48.9642	51.9812	49.9818	1.7316	74.3378	72.5291	75.9229	74.2633	1.69812	0.000246411	1.48581
P07585	Decorin OS=Homo sapiens GN=DCN PE=1 SV=1 - [PGS2_HUMAN]	36	31.0734	30.4041	32.4925	3.05596	48.9065	49.3198	46.5028	48.243	1.52119	0.00478091	1.48474
P51888	Prolargin OS=Homo sapiens GN=PRELP PE=1 SV=1 - [PRELP_HUMAN]	85	74.3879	73.5583	77.6487	6.37988	112.485	116.047	115.782	114.771	1.98455	0.00822734	1.47808
P12814-3	Isoform 3 of Alpha-actinin-1 OS=Homo sapiens GN=ACTN1 - [ACTN1_HUMAN]	257	239.171	244.213	246.795	9.19038	351.148	379.086	363.481	364.572	14.0006	0.0061945	1.47723
P01891	HLA class I histocompatibility antigen, A-68 alpha chain OS=Homo sapiens GN=HLA-A PE=1 SV=4 - [1A68_HUMAN]	45	32.0151	33.3464	36.7872	7.14361	51.8408	58.9904	52.197	54.3427	4.0289	0.0476826	1.47722
P06733	Alpha-enolase OS=Homo sapiens GN=ENO1 PE=1 SV=2 - [ENOA_HUMAN]	174	174.2	153.982	167.394	11.6155	246.489	248.533	246.75	247.257	1.11284	0.00325374	1.4771
P01857	Ig gamma-1 chain C region OS=Homo sapiens GN=IGHG1 PE=1 SV=1 - [IGHG1_HUMAN]	52	59.322	60.8082	57.3767	4.7153	81.1847	83.1668	87.3114	83.8876	3.1263	0.00168201	1.46205
P27797	Calreticulin OS=Homo sapiens GN=CALR PE=1 SV=1 - [CALR_HUMAN]	42	54.6139	50.0196	48.8779	6.38401	69.4472	69.628	74.9739	71.3497	3.13997	0.0136961	1.45975
C9J9K3	40S ribosomal protein SA (Fragment) OS=Homo sapiens GN=RPSA PE=2 SV=1 - [C9J9K3_HUMAN]	32	32.9567	34.3272	33.0946	1.16971	44.9939	52.221	47.4518	48.2223	3.67461	0.00909572	1.4571
Q9UQ80	Proliferation-associated protein 2G4 OS=Homo sapiens GN=PA2G4 PE=1 SV=3 - [PA2G4_HUMAN]	24	27.307	21.5771	24.2947	2.87628	31.3001	38.6822	36.0634	35.3486	3.74259	0.0168263	1.45499
Q562R1	Beta-actin-like protein 2 OS=Homo sapiens GN=ACTBL2 PE=1 SV=2 - [ACTBL_HUMAN]	308	272.128	276.579	285.569	19.5528	421.574	406.163	416.627	414.788	7.86808	0.00191163	1.4525
Q6NUK1	Calcium-binding mitochondrial carrier protein SCaMC-1 OS=Homo sapiens GN=SLC25A24 PE=1 SV=2 - [SCMC1_HUMAN]	19	17.8908	23.5386	20.1431	2.99244	29.3439	26.1105	32.2672	29.2405	3.07968	0.00245872	1.45164
P21333-2	Isoform 2 of Filamin-A OS=Homo sapiens GN=FLNA - [FLNA_HUMAN]	490	472.693	477.638	480.11	8.91439	694.472	699.181	692.797	695.483	3.31011	0.000434965	1.44859
Q99715-4	Isoform 4 of Collagen alpha-1(XII) chain OS=Homo sapiens GN=COL12A1 - [COCA1_HUMAN]	109	93.2203	104.943	102.388	8.1943	146.719	139.256	157.54	147.838	9.19329	0.00442577	1.44391
P04843	Dolichyl-diphosphooligosaccharide--protein glycosyltransferase subunit 1 OS=Homo sapiens GN=RPN1 PE=1 SV=1 - [RPN1_HUMAN]	24	21.6573	25.5002	23.7191	1.93681	35.2126	34.814	32.2672	34.098	1.59792	0.015816	1.43757
G5EA52	Protein disulfide isomerase family A, member 3, isoform CRA_b OS=Homo sapiens GN=PDIA3 PE=3 SV=1 - [G5EA52_HUMAN]	110	114.878	116.712	113.863	3.46925	159.435	164.399	167.03	163.622	3.85699	1.59437e-05	1.437
P08758	Annexin A5 OS=Homo sapiens GN=ANXA5 PE=1 SV=2 - [ANXA5_HUMAN]	95	93.2203	99.0585	95.7596	2.99226	139.872	134.421	136.661	136.985	2.74024	0.00129068	1.43051
P13760	HLA class II histocompatibility antigen, DRB1-4 beta chain OS=Homo sapiens GN=HLA-DRB1 PE=1 SV=1 - [2B14_HUMAN]	24	24.4821	25.5002	24.6608	0.765889	37.1689	32.8799	35.1144	35.0544	2.14514	0.00922154	1.42146
P23284	Peptidyl-prolyl cis-trans isomerase B OS=Homo sapiens GN=PPIB PE=1 SV=2 - [PPIB_HUMAN]	89	93.2203	87.2891	89.8365	3.0528	130.091	128.618	123.375	127.361	3.53021	0.00113907	1.4177
P78371	T-complex protein 1 subunit beta OS=Homo sapiens GN=CCT2 PE=1 SV=4 - [TCPB_HUMAN]	32	31.0734	28.4425	30.5053	1.84553	44.0158	44.4845	39.8595	42.7866	2.54574	0.00115288	1.4026
P07339	Cathepsin D OS=Homo sapiens GN=CTSD PE=1 SV=1 - [CATD_HUMAN]	48	57.4388	64.7313	56.7234	8.38855	82.1628	76.3974	79.7191	79.4264	2.89385	0.0301576	1.40024
P04179	Superoxide dismutase OS=Homo sapiens GN=SOD2 PE=2 SV=1 - [P04179_HUMAN]	40	34.8399	43.1542	39.3314	4.19726	55.7534	50.2869	58.8403	54.9602	4.33151	1.76939e-05	1.39736
P09493-3	Isoform 3 of Tropomyosin alpha-1 chain OS=Homo sapiens GN=TPM1 - [TPM1_HUMAN]	122	107.345	109.847	113.064	7.8394	157.479	175.037	140.457	157.658	17.2905	0.0309113	1.39441
P01859	Ig gamma-2 chain C region OS=Homo sapiens GN=IGHG2 PE=1 SV=2 - [IGHG2_HUMAN]	33	30.1318	27.4617	30.1979	2.76972	39.1252	44.4845	42.7067	42.1055	2.7298	0.0273003	1.39432
O00264	Membrane-associated progesterone receptor component 1 OS=Homo sapiens GN=PGRMC1 PE=1 SV=3 - [PGRC1_HUMAN]	34	28.2486	30.4041	30.8842	2.90561	43.0377	46.4187	38.9105	42.7889	3.76025	0.0314651	1.38546
P60174-1	Isoform 2 of Triosephosphate isomerase OS=Homo sapiens GN=TPI1 - [TPIS_HUMAN]	144	186.441	189.29	173.244	25.3657	193.67	275.611	244.851	238.044	41.3926	0.0171039	1.37404
P11047	Laminin subunit gamma-1 OS=Homo sapiens GN=LAMC1 PE=1 SV=3 - [LAMC1_HUMAN]	79	75.3296	84.3468	79.5588	4.53451	112.485	103.475	111.037	108.999	4.83845	0.00244302	1.37004
Q13813-3	Isoform 3 of Spectrin alpha chain, non-erythrocytic 1 OS=Homo sapiens GN=SPTAN1 - [SPTN1_HUMAN]	667	646.893	656.14	656.677	10.0645	480.261	496.099	481.162	485.841	8.8956	0.00190713	-1.35163
P30044-2	Isoform Cytoplasmic+peroxisomal of Peroxiredoxin-5, mitochondrial OS=Homo sapiens GN=PRDX5 - [PRDX5_HUMAN]	35	44.2561	42.1734	40.4765	4.85577	29.3439	30.9458	29.4201	29.9033	0.903645	0.0251214	-1.35358
Q9UIJ7	GTP:AMP phosphotransferase AK3, mitochondrial OS=Homo sapiens GN=AK3 PE=1 SV=4 - [KAD3_HUMAN]	30	34.8399	25.5002	30.1134	4.6709	19.5626	25.1434	21.8278	22.178	2.80685	0.0328848	-1.35781
P49411	Elongation factor Tu, mitochondrial OS=Homo sapiens GN=TUFM PE=1 SV=2 - [EFTU_HUMAN]	50	59.322	46.0965	51.8062	6.79524	34.2345	41.5834	36.0634	37.2938	3.82581	0.0122159	-1.38914
O15230	Laminin subunit alpha-5 OS=Homo sapiens GN=LAMA5 PE=1 SV=8 - [LAMA5_HUMAN]	43	40.4896	49.0388	44.1762	4.39428	28.3657	30.9458	36.0634	31.7916	3.91792	0.00716683	-1.38955
P40939	Trifunctional enzyme subunit alpha, mitochondrial OS=Homo sapiens GN=HADHA PE=1 SV=2 - [ECHA_HUMAN]	128	128.06	123.578	126.546	2.57069	90.966	90.9032	90.1585	90.6759	0.449187	0.000582977	-1.39559
P28838-2	Isoform 2 of Cytosol aminopeptidase OS=Homo sapiens GN=LAP3 - [AMPL_HUMAN]	73	67.7966	67.6736	69.4901	3.04031	55.7534	41.5834	50.2989	49.2119	7.14726	0.0103773	-1.41206
P19440	Gamma-glutamyltranspeptidase 1 OS=Homo sapiens GN=GGT1 PE=1 SV=2 - [GGT1_HUMAN]	46	42.3729	49.0388	45.8039	3.3373	31.3001	27.0775	38.9105	32.4294	5.99676	0.00728402	-1.41242
P32119	Peroxiredoxin-2 OS=Homo sapiens GN=PRDX2 PE=1 SV=5 - [PRDX2_HUMAN]	43	36.7232	33.3464	37.6899	4.89886	29.3439	25.1434	24.675	26.3874	2.57105	0.00798419	-1.42833
P36957	Dihydrolipoyllysine-residue succinyltransferase component of 2-oxoglutarate dehydrogenase complex, mitochondrial OS=Homo sapiens GN=DLST PE=1 SV=4 - [ODO2_HUMAN]	74	68.7382	62.7697	68.5026	5.61885	48.9065	47.3857	47.4518	47.9147	0.859547	0.00930038	-1.42968
P08559-3	Isoform 3 of Pyruvate dehydrogenase E1 component subunit alpha, somatic form, mitochondrial OS=Homo sapiens GN=PDHA1 - [ODPA_HUMAN]	41	43.3145	46.0965	43.4703	2.55183	30.322	29.9787	30.3692	30.2233	0.213123	0.00595132	-1.43831
B4DJV2	Citrate synthase OS=Homo sapiens GN=CS PE=2 SV=1 - [B4DJV2_HUMAN]	47	32.0151	43.1542	40.7231	7.78266	30.322	28.0446	26.573	28.3132	1.88886	0.0493938	-1.43831
P06576	ATP synthase subunit beta, mitochondrial OS=Homo sapiens GN=ATP5B PE=1 SV=3 - [ATPB_HUMAN]	430	413.371	437.426	426.932	12.3176	299.307	300.754	289.456	296.506	6.14798	0.00303408	-1.43988
P48681	Nestin OS=Homo sapiens GN=NES PE=1 SV=2 - [NEST_HUMAN]	40	38.6064	33.3464	37.3176	3.50903	22.497	26.1105	28.4711	25.6929	3.00888	0.0434647	-1.45245
Q9H4M9	EH domain-containing protein 1 OS=Homo sapiens GN=EHD1 PE=1 SV=2 - [EHD1_HUMAN]	33	26.3653	31.3849	30.2501	3.45984	20.5407	19.3411	21.8278	20.5699	1.24363	0.0126578	-1.4706
E9PH29	Thioredoxin-dependent peroxide reductase, mitochondrial OS=Homo sapiens GN=PRDX3 PE=2 SV=1 - [E9PH29_HUMAN]	65	54.6139	51.0004	56.8714	7.2677	35.2126	40.6163	39.8595	38.5628	2.92592	0.043678	-1.47477
Q99714	3-hydroxyacyl-CoA dehydrogenase type-2 OS=Homo sapiens GN=HSD17B10 PE=1 SV=3 - [HCD2_HUMAN]	58	48.0226	47.0773	51.0333	6.05183	37.1689	30.9458	35.1144	34.4097	3.17085	0.0115387	-1.48311
P13073	Cytochrome c oxidase subunit 4 isoform 1, mitochondrial OS=Homo sapiens GN=COX4I1 PE=1 SV=1 - [COX41_HUMAN]	68	57.4388	55.9043	60.4477	6.58534	46.9502	33.8469	40.8086	40.5352	6.5559	0.0078066	-1.49124
F5GY37	Prohibitin-2 OS=Homo sapiens GN=PHB2 PE=2 SV=1 - [F5GY37_HUMAN]	56	58.3804	56.8851	57.0885	1.20318	35.2126	38.6822	39.8595	37.9181	2.41584	0.00169062	-1.50557
P13645	Keratin, type I cytoskeletal 10 OS=Homo sapiens GN=KRT10 PE=1 SV=6 - [K1C10_HUMAN]	290	274.953	268.733	277.895	10.9346	190.735	184.708	175.572	183.672	7.63459	0.000397223	-1.513
P40926	Malate dehydrogenase, mitochondrial OS=Homo sapiens GN=MDH2 PE=1 SV=3 - [MDHM_HUMAN]	131	122.411	142.213	131.874	9.92996	88.0316	83.1668	88.2604	86.4863	2.87705	0.00466476	-1.5248
P12821	Angiotensin-converting enzyme OS=Homo sapiens GN=ACE PE=1 SV=1 - [ACE_HUMAN]	59	52.7307	55.9043	55.8783	3.13473	30.322	40.6163	37.0124	35.9836	5.22371	0.0268675	-1.55288
P02042	Hemoglobin subunit delta OS=Homo sapiens GN=HBD PE=1 SV=2 - [HBD_HUMAN]	250	292.844	271.675	271.506	21.4223	168.238	178.905	176.521	174.555	5.59871	0.00456901	-1.55542
Q99798	Aconitate hydratase, mitochondrial OS=Homo sapiens GN=ACO2 PE=1 SV=2 - [ACON_HUMAN]	168	174.2	166.732	169.644	3.99599	103.682	105.409	114.833	107.975	6.00229	0.00332342	-1.57114
Q07157-2	Isoform Short of Tight junction protein ZO-1 OS=Homo sapiens GN=TJP1 - [ZO1_HUMAN]	43	42.3729	46.0965	43.8231	1.99362	24.4532	26.1105	32.2672	27.6103	4.11726	0.003492	-1.5872
P24752	Acetyl-CoA acetyltransferase, mitochondrial OS=Homo sapiens GN=ACAT1 PE=1 SV=1 - [THIL_HUMAN]	201	206.215	198.117	201.777	4.10445	131.069	122.816	127.171	127.019	4.12874	0.00166899	-1.58856
Q9UHG3	Prenylcysteine oxidase 1 OS=Homo sapiens GN=PCYOX1 PE=1 SV=3 - [PCYOX_HUMAN]	43	37.6648	36.2887	38.9845	3.54493	23.4751	21.2752	28.4711	24.4071	3.68737	0.0265341	-1.59726
P16152	Carbonyl reductase [NADPH] 1 OS=Homo sapiens GN=CBR1 PE=1 SV=3 - [CBR1_HUMAN]	60	64.0301	62.7697	62.2666	2.06163	38.147	41.5834	37.0124	38.9143	2.3801	0.00134722	-1.6001
K7EJE8	Lon protease homolog, mitochondrial OS=Homo sapiens GN=LONP1 PE=3 SV=1 - [K7EJE8_HUMAN]	61	65.9134	61.7889	62.9008	2.63864	34.2345	42.5504	38.9105	38.5652	4.1687	0.00125796	-1.63103
O75947	ATP synthase subunit d, mitochondrial OS=Homo sapiens GN=ATP5H PE=1 SV=3 - [ATP5H_HUMAN]	52	58.3804	49.0388	53.1398	4.77394	30.322	32.8799	34.1653	32.4557	1.95645	0.010919	-1.6373
P31937	3-hydroxyisobutyrate dehydrogenase, mitochondrial OS=Homo sapiens GN=HIBADH PE=1 SV=2 - [3HIDH_HUMAN]	107	105.461	115.732	109.398	5.53907	70.4253	66.7268	62.6364	66.5962	3.89608	0.00717848	-1.6427
P05091	Aldehyde dehydrogenase, mitochondrial OS=Homo sapiens GN=ALDH2 PE=1 SV=2 - [ALDH2_HUMAN]	187	177.966	184.386	183.117	4.64865	111.507	104.442	117.681	111.21	6.62428	0.000684064	-1.64659
P12694	2-oxoisovalerate dehydrogenase subunit alpha, mitochondrial OS=Homo sapiens GN=BCKDHA PE=1 SV=2 - [ODBA_HUMAN]	33	37.6648	39.2311	36.632	3.24139	20.5407	22.2423	23.7259	22.1696	1.59385	0.002382	-1.65235
P27144	GTP:AMP phosphotransferase AK4, mitochondrial OS=Homo sapiens GN=AK4 PE=1 SV=1 - [KAD4_HUMAN]	58	62.1469	61.7889	60.6453	2.29786	33.2564	43.5175	33.2163	36.6634	5.93586	0.00713323	-1.65411
F5H897	Heat shock protein 75 kDa, mitochondrial OS=Homo sapiens GN=TRAP1 PE=2 SV=1 - [F5H897_HUMAN]	46	48.0226	51.9812	48.6679	3.04236	27.3876	28.0446	32.2672	29.2332	2.64806	0.000231351	-1.66482
Q5QNZ2	ATP synthase subunit b, mitochondrial OS=Homo sapiens GN=ATP5F1 PE=2 SV=1 - [Q5QNZ2_HUMAN]	56	53.6723	48.0581	52.5768	4.08273	25.4314	33.8469	35.1144	31.4642	5.2629	0.027124	-1.671
P07195	L-lactate dehydrogenase B chain OS=Homo sapiens GN=LDHB PE=1 SV=2 - [LDHB_HUMAN]	128	140.301	140.251	136.184	7.08771	89.0097	76.3974	74.9739	80.127	7.72553	0.0112222	-1.6996
P31930	Cytochrome b-c1 complex subunit 1, mitochondrial OS=Homo sapiens GN=UQCRC1 PE=1 SV=3 - [QCR1_HUMAN]	59	61.2053	65.712	61.9724	3.42115	35.2126	35.781	37.0124	36.002	0.92002	0.00153886	-1.72136
P68871	Hemoglobin subunit beta OS=Homo sapiens GN=HBB PE=1 SV=2 - [HBB_HUMAN]	428	471.751	404.08	434.61	34.3166	256.27	249.5	251.495	252.422	3.47864	0.00638005	-1.72176
Q9UHQ9	NADH-cytochrome b5 reductase 1 OS=Homo sapiens GN=CYB5R1 PE=1 SV=1 - [NB5R1_HUMAN]	43	36.7232	38.2503	39.3245	3.27339	22.497	22.2423	23.7259	22.8217	0.793347	0.00718701	-1.72312
P07954-2	Isoform Cytoplasmic of Fumarate hydratase, mitochondrial OS=Homo sapiens GN=FH - [FUMH_HUMAN]	64	64.9718	71.5967	66.8562	4.13409	31.3001	41.5834	42.7067	38.5301	6.28644	0.00449082	-1.73517
P10809	60 kDa heat shock protein, mitochondrial OS=Homo sapiens GN=HSPD1 PE=1 SV=2 - [CH60_HUMAN]	252	258.945	230.483	247.143	14.8401	150.632	141.19	133.814	141.879	8.42997	0.00183316	-1.74193
P17174	Aspartate aminotransferase, cytoplasmic OS=Homo sapiens GN=GOT1 PE=1 SV=3 - [AATC_HUMAN]	40	46.1394	40.2118	42.1171	3.48502	23.4751	27.0775	21.8278	24.1268	2.68485	0.000886083	-1.74565
O95831-3	Isoform 3 of Apoptosis-inducing factor 1, mitochondrial OS=Homo sapiens GN=AIFM1 - [AIFM1_HUMAN]	148	127.119	139.27	138.13	10.4873	84.1191	72.5291	78.77	78.4728	5.80069	0.00103249	-1.76022
P19404	NADH dehydrogenase [ubiquinone] flavoprotein 2, mitochondrial OS=Homo sapiens GN=NDUFV2 PE=1 SV=2 - [NDUV2_HUMAN]	46	54.6139	46.0965	48.9035	4.94563	27.3876	30.9458	24.675	27.6694	3.14489	0.00235511	-1.76742
O60656	UDP-glucuronosyltransferase 1-9 OS=Homo sapiens GN=UGT1A9 PE=1 SV=1 - [UD19_HUMAN]	39	42.3729	29.4233	36.9321	6.7179	21.5188	19.3411	21.8278	20.8959	1.35535	0.0354596	-1.76743
P21912	Succinate dehydrogenase [ubiquinone] iron-sulfur subunit, mitochondrial OS=Homo sapiens GN=SDHB PE=1 SV=3 - [DHSB_HUMAN]	48	49.9058	41.1926	46.3662	4.58062	26.4095	26.1105	25.624	26.048	0.396459	0.00716403	-1.78003
P35908	Keratin, type II cytoskeletal 2 epidermal OS=Homo sapiens GN=KRT2 PE=1 SV=2 - [K22E_HUMAN]	487	434.087	469.792	463.626	26.9902	243.554	275.611	254.342	257.836	16.3114	0.00721942	-1.79815
P30086	Phosphatidylethanolamine-binding protein 1 OS=Homo sapiens GN=PEBP1 PE=1 SV=3 - [PEBP1_HUMAN]	115	120.527	121.616	119.048	3.5476	64.5565	60.9245	73.0758	66.1856	6.23733	0.00207343	-1.7987
P11177-2	Isoform 2 of Pyruvate dehydrogenase E1 component subunit beta, mitochondrial OS=Homo sapiens GN=PDHB - [ODPB_HUMAN]	69	79.096	81.4045	76.5002	6.59709	44.9939	43.5175	37.9615	42.1576	3.70821	0.0129849	-1.81462
H0YL12	Electron transfer flavoprotein subunit alpha, mitochondrial (Fragment) OS=Homo sapiens GN=ETFA PE=4 SV=1 - [H0YL12_HUMAN]	65	76.2712	74.539	71.9367	6.0695	44.9939	33.8469	39.8595	39.5668	5.57926	0.0194275	-1.81811
B7Z6B8	2,4-dienoyl-CoA reductase, mitochondrial OS=Homo sapiens GN=DECR1 PE=2 SV=1 - [B7Z6B8_HUMAN]	79	84.7458	84.3468	82.6975	3.20836	54.7752	39.6493	41.7576	45.394	8.19245	0.0148635	-1.82177
P05023	Sodium/potassium-transporting ATPase subunit alpha-1 OS=Homo sapiens GN=ATP1A1 PE=1 SV=1 - [AT1A1_HUMAN]	122	131.827	127.501	127.109	4.92507	68.469	75.4303	63.5855	69.1616	5.95272	0.0014216	-1.83786
Q9Y6C2	EMILIN-1 OS=Homo sapiens GN=EMILIN1 PE=1 SV=2 - [EMIL1_HUMAN]	72	68.7382	65.712	68.8168	3.14471	42.0595	35.781	34.1653	37.3353	4.17031	0.000382704	-1.84321
P98082-2	Isoform 2 of Disabled homolog 2 OS=Homo sapiens GN=DAB2 - [DAB2_HUMAN]	45	43.3145	43.1542	43.8229	1.02255	21.5188	22.2423	27.5221	23.7611	3.27715	0.00656348	-1.84432
Q9NX63	Coiled-coil-helix-coiled-coil-helix domain-containing protein 3, mitochondrial OS=Homo sapiens GN=CHCHD3 PE=1 SV=1 - [CHCH3_HUMAN]	46	44.2561	32.3656	40.8739	7.4198	18.5845	22.2423	25.624	22.1502	3.52067	0.0470675	-1.8453
P22695	Cytochrome b-c1 complex subunit 2, mitochondrial OS=Homo sapiens GN=UQCRC2 PE=1 SV=3 - [QCR2_HUMAN]	72	67.7966	72.5775	70.7914	2.60956	39.1252	33.8469	41.7576	38.2432	4.02841	0.000397397	-1.85108
Q00610-2	Isoform 2 of Clathrin heavy chain 1 OS=Homo sapiens GN=CLTC - [CLH1_HUMAN]	54	61.2053	57.8658	57.6904	3.60584	31.3001	32.8799	26.573	30.251	3.2817	0.00416397	-1.90706
P54819-5	Isoform 5 of Adenylate kinase 2, mitochondrial OS=Homo sapiens GN=AK2 - [KAD2_HUMAN]	63	48.9642	61.7889	57.9177	7.77757	25.4314	30.9458	34.1653	30.1808	4.41695	0.0194993	-1.91902
O14745	Na(+)/H(+) exchange regulatory cofactor NHE-RF1 OS=Homo sapiens GN=SLC9A3R1 PE=1 SV=4 - [NHRF1_HUMAN]	98	87.5706	90.2315	91.934	5.41914	53.7971	42.5504	45.5538	47.3004	5.82323	1.40919e-05	-1.94362
P00367	Glutamate dehydrogenase 1, mitochondrial OS=Homo sapiens GN=GLUD1 PE=1 SV=2 - [DHE3_HUMAN]	201	184.557	184.386	189.981	9.54298	95.8566	98.6396	97.7508	97.4157	1.42144	0.00229457	-1.95021
P23786	Carnitine O-palmitoyltransferase 2, mitochondrial OS=Homo sapiens GN=CPT2 PE=1 SV=2 - [CPT2_HUMAN]	44	44.2561	42.1734	43.4765	1.13577	19.5626	21.2752	25.624	22.1539	3.12478	0.00633581	-1.96247
Q9UBQ7	Glyoxylate reductase/hydroxypyruvate reductase OS=Homo sapiens GN=GRHPR PE=1 SV=1 - [GRHPR_HUMAN]	47	47.081	53.9427	49.3412	3.98521	24.4532	28.0446	22.7769	25.0916	2.69125	0.0106883	-1.96645
Q08257	Quinone oxidoreductase OS=Homo sapiens GN=CRYZ PE=1 SV=1 - [QOR_HUMAN]	62	80.0377	65.712	69.2499	9.52505	39.1252	31.9128	34.1653	35.0678	3.68989	0.0219448	-1.97474
P14550	Alcohol dehydrogenase [NADP(+)] OS=Homo sapiens GN=AKR1A1 PE=1 SV=3 - [AK1A1_HUMAN]	118	99.8117	108.866	108.893	9.09419	54.7752	53.188	56.9422	54.9685	1.88453	0.00407081	-1.981
Q13011	Delta(3,5)-Delta(2,4)-dienoyl-CoA isomerase, mitochondrial OS=Homo sapiens GN=ECH1 PE=1 SV=2 - [ECH1_HUMAN]	73	72.5047	72.5775	72.6941	0.267436	38.147	36.7481	32.2672	35.7208	3.07156	0.00103985	-2.03506
P42704	Leucine-rich PPR motif-containing protein, mitochondrial OS=Homo sapiens GN=LRPPRC PE=1 SV=3 - [LPPRC_HUMAN]	204	201.507	223.617	209.708	12.1101	98.791	105.409	102.496	102.232	3.31689	0.0022984	-2.05129
O75309	Cadherin-16 OS=Homo sapiens GN=CDH16 PE=1 SV=1 - [CAD16_HUMAN]	81	78.1544	86.3084	81.8209	4.13849	41.0814	39.6493	37.9615	39.5641	1.56172	0.00262212	-2.06806
P35237	Serpin B6 OS=Homo sapiens GN=SERPINB6 PE=1 SV=3 - [SPB6_HUMAN]	46	46.1394	38.2503	43.4632	4.51506	24.4532	19.3411	18.9807	20.925	3.06082	0.00482058	-2.07709
Q6NVY1	3-hydroxyisobutyryl-CoA hydrolase, mitochondrial OS=Homo sapiens GN=HIBCH PE=1 SV=2 - [HIBCH_HUMAN]	58	52.7307	61.7889	57.5065	4.54924	25.4314	27.0775	30.3692	27.626	2.51419	0.00254398	-2.08161
P22352	Glutathione peroxidase 3 OS=Homo sapiens GN=GPX3 PE=1 SV=2 - [GPX3_HUMAN]	90	108.286	86.3084	94.8649	11.7689	44.9939	47.3857	43.6557	45.3451	1.88965	0.00656485	-2.09206
O75874	Isocitrate dehydrogenase [NADP] cytoplasmic OS=Homo sapiens GN=IDH1 PE=1 SV=2 - [IDHC_HUMAN]	90	107.345	103.962	100.436	9.19441	49.8846	46.4187	44.6047	46.9693	2.68266	0.00765079	-2.13832
P00491	Purine nucleoside phosphorylase OS=Homo sapiens GN=PNP PE=1 SV=2 - [PNPH_HUMAN]	57	60.2637	52.9619	56.7419	3.65769	28.3657	25.1434	25.624	26.3777	1.73836	0.00311341	-2.15113
Q7Z794	Keratin, type II cytoskeletal 1b OS=Homo sapiens GN=KRT77 PE=2 SV=3 - [K2C1B_HUMAN]	63	63.0885	61.7889	62.6258	0.726109	28.3657	31.9128	26.573	28.9505	2.71751	0.000699656	-2.1632
P45954	Short/branched chain specific acyl-CoA dehydrogenase, mitochondrial OS=Homo sapiens GN=ACADSB PE=1 SV=1 - [ACDSB_HUMAN]	48	48.0226	46.0965	47.373	1.10556	19.5626	21.2752	24.675	21.8376	2.60217	0.00339205	-2.16933
P15144	Aminopeptidase N OS=Homo sapiens GN=ANPEP PE=1 SV=4 - [AMPN_HUMAN]	347	335.217	325.618	335.945	10.7096	161.391	157.63	144.254	154.425	9.00719	8.14528e-05	-2.17546
P04040	Catalase OS=Homo sapiens GN=CAT PE=1 SV=3 - [CATA_HUMAN]	151	145.951	159.867	152.273	7.04453	76.2941	72.5291	60.7384	69.8539	8.1156	0.00506989	-2.17987
P49419-2	Isoform 2 of Alpha-aminoadipic semialdehyde dehydrogenase OS=Homo sapiens GN=ALDH7A1 - [AL7A1_HUMAN]	80	81.9209	85.3276	82.4162	2.6981	35.2126	41.5834	35.1144	37.3035	3.70684	0.0019913	-2.20934
Q96I99	Succinyl-CoA ligase [GDP-forming] subunit beta, mitochondrial OS=Homo sapiens GN=SUCLG2 PE=1 SV=2 - [SUCB2_HUMAN]	92	92.2787	97.0969	93.7919	2.86563	44.9939	44.4845	37.0124	42.1636	4.46834	0.00332958	-2.22447
Q92820	Gamma-glutamyl hydrolase OS=Homo sapiens GN=GGH PE=1 SV=2 - [GGH_HUMAN]	54	59.322	64.7313	59.3511	5.36569	21.5188	30.9458	26.573	26.3459	4.71757	0.00365109	-2.25277
Q16795	NADH dehydrogenase [ubiquinone] 1 alpha subcomplex subunit 9, mitochondrial OS=Homo sapiens GN=NDUFA9 PE=1 SV=2 - [NDUA9_HUMAN]	53	52.7307	55.9043	53.8783	1.75969	24.4532	27.0775	19.9298	23.8202	3.61569	0.00514831	-2.26188
Q16836	Hydroxyacyl-coenzyme A dehydrogenase, mitochondrial OS=Homo sapiens GN=HADH PE=1 SV=3 - [HCDH_HUMAN]	57	49.9058	58.8466	55.2508	4.72007	25.4314	23.2093	23.7259	24.1222	1.16281	0.00304845	-2.29046
O95202	LETM1 and EF-hand domain-containing protein 1, mitochondrial OS=Homo sapiens GN=LETM1 PE=1 SV=1 - [LETM1_HUMAN]	62	65.9134	66.6928	64.8687	2.51478	28.3657	30.9458	25.624	28.3118	2.6613	0.00194811	-2.29122
P30837	Aldehyde dehydrogenase X, mitochondrial OS=Homo sapiens GN=ALDH1B1 PE=1 SV=3 - [AL1B1_HUMAN]	85	80.0377	73.5583	79.532	5.73761	38.147	31.9128	31.3182	33.7927	3.78267	0.00076208	-2.35353
P30084	Enoyl-CoA hydratase, mitochondrial OS=Homo sapiens GN=ECHS1 PE=1 SV=4 - [ECHM_HUMAN]	90	88.5122	92.193	90.2351	1.85161	39.1252	37.7152	37.9615	38.2673	0.7531	0.00023711	-2.35802
P00918	Carbonic anhydrase 2 OS=Homo sapiens GN=CA2 PE=1 SV=2 - [CAH2_HUMAN]	46	55.5556	58.8466	53.4674	6.67302	23.4751	20.3082	22.7769	22.1867	1.66391	0.00954221	-2.40988
Q03154	Aminoacylase-1 OS=Homo sapiens GN=ACY1 PE=1 SV=1 - [ACY1_HUMAN]	132	138.418	150.059	140.159	9.15443	55.7534	54.1551	61.6874	57.1986	3.96868	0.000918298	-2.45039
P36543	V-type proton ATPase subunit E 1 OS=Homo sapiens GN=ATP6V1E1 PE=1 SV=1 - [VATE1_HUMAN]	72	84.7458	83.366	80.0373	6.99458	40.1033	27.0775	25.624	30.9349	7.97321	0.0146755	-2.58728
P38117	Electron transfer flavoprotein subunit beta OS=Homo sapiens GN=ETFB PE=1 SV=3 - [ETFB_HUMAN]	61	56.4972	52.9619	56.8197	4.02872	20.5407	20.3082	24.675	21.8413	2.45679	0.00511596	-2.60148
Q02218	2-oxoglutarate dehydrogenase, mitochondrial OS=Homo sapiens GN=OGDH PE=1 SV=3 - [ODO1_HUMAN]	55	59.322	59.8274	58.0498	2.65327	25.4314	14.5058	26.573	22.1701	6.66193	0.00799792	-2.61839
Q93088	Betaine--homocysteine S-methyltransferase 1 OS=Homo sapiens GN=BHMT PE=1 SV=2 - [BHMT1_HUMAN]	83	71.5631	70.6159	75.0597	6.89281	29.3439	23.2093	33.2163	28.5898	5.04591	0.00522166	-2.6254
J3KNU8	Methylmalonate-semialdehyde dehydrogenase [acylating], mitochondrial OS=Homo sapiens GN=ALDH6A1 PE=3 SV=1 - [J3KNU8_HUMAN]	210	211.864	203.021	208.295	4.66181	76.2941	77.3644	78.77	77.4762	1.24177	0.000316339	-2.6885
P16444	Dipeptidase 1 OS=Homo sapiens GN=DPEP1 PE=1 SV=3 - [DPEP1_HUMAN]	78	73.4463	81.4045	77.6169	3.99288	30.322	28.0446	25.624	27.9969	2.34937	0.0020023	-2.77234
P98164	Low-density lipoprotein receptor-related protein 2 OS=Homo sapiens GN=LRP2 PE=1 SV=3 - [LRP2_HUMAN]	98	92.2787	88.2699	92.8495	4.8901	36.1908	31.9128	32.2672	33.4569	2.37418	0.000431267	-2.77519
P08195-2	Isoform 2 of 4F2 cell-surface antigen heavy chain OS=Homo sapiens GN=SLC3A2 - [4F2_HUMAN]	84	88.5122	91.2122	87.9082	3.64387	33.2564	27.0775	31.3182	30.5507	3.16011	0.00168354	-2.87745
P80404	4-aminobutyrate aminotransferase, mitochondrial OS=Homo sapiens GN=ABAT PE=1 SV=3 - [GABT_HUMAN]	101	96.0452	77.4814	91.5089	12.3982	33.2564	28.0446	32.2672	31.1894	2.76803	0.00765997	-2.93397
Q5T2W1	Na(+)/H(+) exchange regulatory cofactor NHE-RF3 OS=Homo sapiens GN=PDZK1 PE=1 SV=2 - [NHRF3_HUMAN]	88	94.162	91.2122	91.1247	3.08191	33.2564	29.0117	29.4201	30.5627	2.3417	0.00127697	-2.98156
Q16822	Phosphoenolpyruvate carboxykinase [GTP], mitochondrial OS=Homo sapiens GN=PCK2 PE=1 SV=3 - [PCKGM_HUMAN]	227	211.864	225.579	221.481	8.3585	76.2941	63.8257	72.1268	70.7488	6.34739	5.37318e-05	-3.13053
P16662	UDP-glucuronosyltransferase 2B7 OS=Homo sapiens GN=UGT2B7 PE=1 SV=1 - [UD2B7_HUMAN]	75	80.0377	73.5583	76.1986	3.40195	23.4751	22.2423	26.573	24.0968	2.23131	0.00179926	-3.16219
Q9UI17	Dimethylglycine dehydrogenase, mitochondrial OS=Homo sapiens GN=DMGDH PE=1 SV=2 - [M2GD_HUMAN]	69	73.4463	71.5967	71.3477	2.2336	18.5845	25.1434	20.8788	21.5356	3.32845	0.000116243	-3.31302
P05062	Fructose-bisphosphate aldolase B OS=Homo sapiens GN=ALDOB PE=1 SV=2 - [ALDOB_HUMAN]	240	244.821	259.906	248.242	10.3846	76.2941	73.4962	71.1778	73.656	2.5619	0.000897091	-3.37029
Q3LXA3	Bifunctional ATP-dependent dihydroxyacetone kinase/FAD-AMP lyase (cyclizing) OS=Homo sapiens GN=DAK PE=1 SV=2 - [DHAK_HUMAN]	75	79.096	70.6159	74.904	4.24087	19.5626	22.2423	20.8788	20.8946	1.33992	0.000808851	-3.58486
Q68CK6	Acyl-coenzyme A synthetase ACSM2B, mitochondrial OS=Homo sapiens GN=ACSM2B PE=1 SV=2 - [ACS2B_HUMAN]	196	199.623	201.059	198.894	2.60724	55.7534	48.3528	60.7384	54.9482	6.23193	0.000323344	-3.61967
P08473	Neprilysin OS=Homo sapiens GN=MME PE=1 SV=2 - [NEP_HUMAN]	133	131.827	145.155	136.661	7.37971	38.147	39.6493	33.2163	37.0042	3.36532	0.00191766	-3.69311
Q08AH3	Acyl-coenzyme A synthetase ACSM2A, mitochondrial OS=Homo sapiens GN=ACSM2A PE=1 SV=2 - [ACS2A_HUMAN]	177	171.375	173.597	173.991	2.83316	48.9065	41.5834	47.4518	45.9806	3.8769	3.38459e-05	-3.78401
P09467	Fructose-1,6-bisphosphatase 1 OS=Homo sapiens GN=FBP1 PE=1 SV=5 - [F16P1_HUMAN]	96	91.3371	91.2122	92.8498	2.72888	22.497	29.0117	21.8278	24.4455	3.96855	0.00113434	-3.79824
P30038	Delta-1-pyrroline-5-carboxylate dehydrogenase, mitochondrial OS=Homo sapiens GN=ALDH4A1 PE=1 SV=3 - [AL4A1_HUMAN]	177	173.258	176.54	175.599	2.04061	43.0377	46.4187	48.4009	45.9524	2.71183	0.000142622	-3.82133
B7Z1R5	V-type proton ATPase catalytic subunit A OS=Homo sapiens GN=ATP6V1A PE=2 SV=1 - [B7Z1R5_HUMAN]	131	125.235	133.386	129.874	4.19023	28.3657	22.2423	31.3182	27.3087	4.62937	3.45124e-06	-4.75575

## Sheet: Supplementary Table S3
Supplementary Table S3. DAVID Analysis
Category	Term	Count	%	P-Value	Genes	List Total	Pop Hits	Pop Total	Fold Enrichment	Bonferroni	Benjamini	FDR
SP_PIR_KEYWORDS	acetylation	90	56.6038	1.36e-36	P24752, P46940, P00367, O60814, O14745, P09467, P06733, Q99714, P60709, P37802, Q5QNZ2, P23246, P45954, P0C0S5, P80404, Q96I99, Q08257, P04843, Q9UQ80, P08758, Q9UQE7, P36957, O60656, P32119, P36543, P22695, P04083, P40926, P49411, P78371, Q13011, Q9NX63, Q07960, Q02218, P35579, Q07955, Q6NUK1, Q03252, P13073, P38117, P42704, Q6NVY1, P20700, Q7Z406, P10809, P16403, P00558, P04179, P14550, P67936,…	159	2635	19235	4.13197	4.9e-34	4.9e-34	1.87e-33
UP_SEQ_FEATURE	transit peptide:Mitochondrion	38	23.8994	5.67e-26	P24752, P00367, O95202, Q5QNZ2, P30837, P05091, P45954, Q9UI17, P80404, P23786, Q96I99, Q16822, P36957, Q16795, P22695, P19404, P40926, P49411, P21912, Q13011, Q02218, Q9NX63, Q68CK6, P13073, P06576, P31930, P42704, Q6NVY1, P31937, Q08AH3, P10809, P12694, P04179, P30084, P40939, P30038, Q99798, Q16836	159	467	19113	9.78134	4.2e-23	4.2e-23	8.62e-23
SP_PIR_KEYWORDS	transit peptide	38	23.8994	8.97e-26	P24752, P00367, O95202, Q5QNZ2, P30837, P05091, P45954, Q9UI17, P80404, P23786, Q96I99, Q16822, P36957, Q16795, P22695, P19404, P40926, P49411, P21912, Q13011, Q02218, Q9NX63, Q68CK6, P13073, P06576, P31930, P42704, Q6NVY1, P31937, Q08AH3, P10809, P12694, P04179, P30084, P40939, P30038, Q99798, Q16836	159	476	19235	9.65766	3.23e-23	1.61e-23	1.23e-22
SP_PIR_KEYWORDS	mitochondrion	45	28.3019	7.24e-24	P24752, P00367, Q9UIJ7, Q99714, O95202, Q5QNZ2, P30837, P05091, P45954, Q9UI17, P80404, P23786, Q96I99, Q16822, P36957, Q16795, P22695, Q6NZI2, P19404, P40926, P49411, P21912, Q13011, Q02218, Q9NX63, Q68CK6, Q6NUK1, P13073, P06576, P27144, P31930, P38117, P42704, Q6NVY1, P31937, Q08AH3, P10809, P12694, P04179, P30084, P40939, O75947, P30038, Q99798, Q16836	159	832	19235	6.54311	2.61e-21	8.69e-22	9.95e-21
GOTERM_CC_FAT	GO:0031980~mitochondrial lumen	29	18.239	3.29e-21	P24752, P00367, Q9UIJ7, Q5QNZ2, P30837, P05091, P45954, Q9UI17, P80404, Q96I99, P36957, Q16795, P40926, P49411, Q02218, Q68CK6, P06576, P27144, P38117, P42704, Q08AH3, P10809, P04179, P12694, P30084, P40939, P30038, Q99798, Q16836	149	227	12782	10.9593	9.18e-19	9.18e-19	4.35e-18
GOTERM_CC_FAT	GO:0005759~mitochondrial matrix	29	18.239	3.29e-21	P24752, P00367, Q9UIJ7, Q5QNZ2, P30837, P05091, P45954, Q9UI17, P80404, Q96I99, P36957, Q16795, P40926, P49411, Q02218, Q68CK6, P06576, P27144, P38117, P42704, Q08AH3, P10809, P04179, P12694, P30084, P40939, P30038, Q99798, Q16836	149	227	12782	10.9593	9.18e-19	9.18e-19	4.35e-18
GOTERM_CC_FAT	GO:0044429~mitochondrial part	42	26.4151	3.31e-21	P24752, P00367, Q9UIJ7, Q99714, O95202, P30086, P04040, Q5QNZ2, P30837, P05091, P45954, Q9UI17, P80404, P23786, Q96I99, P36957, Q16795, P22695, P19404, P40926, P49411, P21912, Q02218, Q9NX63, Q68CK6, Q6NUK1, P13073, P06576, P27144, P31930, P38117, P42704, Q08AH3, P10809, P12694, P04179, P30084, P40939, O75947, P30038, Q99798, Q16836	149	595	12782	6.05543	9.23e-19	4.62e-19	4.37e-18
SP_PIR_KEYWORDS	oxidoreductase	33	20.7547	2.87e-18	P00367, Q99714, Q92626, P04040, P16152, P30837, P05091, P45954, Q9UI17, Q08257, P32119, Q16795, P22695, P19404, P40926, Q9UHG3, P21912, P22352, P00338, Q02218, P07195, Q9UHQ9, P13073, P31930, P31937, O75874, P12694, P04179, P40939, Q9UBQ7, P14550, P30038, Q16836	159	562	19235	7.10351	1.03e-15	2.58e-16	3.94e-15
GOTERM_CC_FAT	GO:0005739~mitochondrion	50	31.4465	1.25e-17	P24752, P00367, Q99714, Q5QNZ2, P45954, Q9UI17, P80404, Q96I99, Q16822, P36957, P36543, P22695, P19404, P40926, P49411, Q13011, Q02218, Q9NX63, Q6NUK1, P13073, P27144, P38117, Q6NVY1, P42704, P10809, P12694, P04179, Q16836, Q9UIJ7, O95202, P30086, P04040, P30837, P05091, P23786, Q16795, Q6NZI2, P21912, Q68CK6, Q5T2W1, P06576, P31930, P31937, Q08AH3, P30084, P40939, P07339, O75947, P30038, Q99798	149	1087	12782	3.94596	3.49e-15	1.16e-15	1.65e-14
GOTERM_BP_FAT	GO:0006091~generation of precursor metabolites and energy	28	17.6101	2.77e-17	P17174, P06733, P04075, Q5QNZ2, P04040, Q96I99, P36957, Q16795, P36543, P22695, P19404, P05062, P40926, P21912, P00338, Q13011, P07195, Q02218, P13073, P06576, P31930, P38117, O75874, P00558, P04179, P14618, O75947, Q99798	146	313	13528	8.28885	4.02e-14	4.02e-14	4.58e-14
SP_PIR_KEYWORDS	disease mutation	47	29.5597	1.53e-14	P62736, P24752, P09467, O14745, P00367, P07951, P04075, Q99714, Q03154, P60709, P68871, P45954, Q9UI17, P80404, P00491, P13645, P23786, P17661, Q9UQE7, O60656, P05062, P98164, P12110, P49411, P02675, P21912, P02452, P00338, P07195, P35579, Q03252, P38117, P42704, Q6NVY1, P12109, P00558, Q7Z406, P10809, P12694, P35908, P40939, P68133, P07339, P30038, Q16836, P04792, P00918	159	1591	19235	3.57374	5.52e-12	1.1e-12	2.1e-11
GOTERM_BP_FAT	GO:0055114~oxidation reduction	33	20.7547	1.57e-13	P00367, Q99714, Q92626, P04040, P16152, P30837, P05091, P45954, Q9UI17, Q08257, P32119, Q16795, P22695, P19404, P40926, Q9UHG3, P21912, P22352, P00338, Q02218, P07195, Q9UHQ9, P31930, P38117, P31937, O75874, P12694, P04179, P40939, Q9UBQ7, P14550, P30038, Q16836	146	639	13528	4.78513	2.28e-10	1.14e-10	2.59e-10
UP_SEQ_FEATURE	binding site:Substrate	21	13.2075	5.7e-13	P05062, P00367, P09467, P40926, P00338, P04075, P06733, Q99714, P07195, Q68CK6, P16152, P45954, P16444, Q6NVY1, Q08AH3, P00558, O75874, Q16822, P14550, Q9UBQ7, P14618	159	297	19113	8.49952	4.22e-10	2.11e-10	8.66e-10
GOTERM_CC_FAT	GO:0019866~organelle inner membrane	23	14.4654	2.72e-11	P24752, P19404, P40926, P21912, O95202, Q99714, Q9NX63, Q5QNZ2, Q6NUK1, Q03252, P13073, P06576, P31930, P42704, P10809, P20700, P04179, P23786, P40939, O75947, Q16836, Q16795, P22695	149	329	12782	5.99714	7.59e-09	1.9e-09	3.6e-08
KEGG_PATHWAY	hsa00280:Valine, leucine and isoleucine degradation	12	7.54717	3.91e-10	P45954, P24752, P80404, P31937, Q6NVY1, P12694, P30084, P40939, Q99714, Q16836, P30837, P05091	100	44	5085	13.8682	4.1e-08	4.1e-08	4.38e-07
GOTERM_CC_FAT	GO:0005743~mitochondrial inner membrane	20	12.5786	2.38e-09	P24752, P19404, P40926, P21912, O95202, Q99714, Q9NX63, Q5QNZ2, Q6NUK1, P13073, P06576, P31930, P10809, P04179, P23786, P40939, O75947, Q16836, Q16795, P22695	149	306	12782	5.60688	6.64e-07	1.33e-07	3.14e-06
GOTERM_BP_FAT	GO:0009060~aerobic respiration	9	5.66038	2.64e-09	P31930, P40926, O75874, P21912, Q96I99, P04040, Q99798, P36957, P22695	146	35	13528	23.8262	3.84e-06	1.28e-06	4.38e-06
GOTERM_CC_FAT	GO:0005740~mitochondrial envelope	23	14.4654	2.72e-09	P24752, P19404, P40926, P21912, O95202, Q99714, P30086, Q02218, P04040, Q9NX63, Q5QNZ2, Q6NUK1, P13073, P06576, P31930, P10809, P04179, P23786, P40939, O75947, Q16836, Q16795, P22695	149	419	12782	4.70897	7.6e-07	1.27e-07	3.6e-06
GOTERM_CC_FAT	GO:0031966~mitochondrial membrane	22	13.8365	4.98e-09	P24752, P19404, P40926, P21912, O95202, Q99714, P30086, Q02218, Q9NX63, Q5QNZ2, Q6NUK1, P13073, P06576, P31930, P10809, P04179, P23786, P40939, O75947, Q16836, Q16795, P22695	149	394	12782	4.79004	1.39e-06	1.98e-07	6.58e-06
KEGG_PATHWAY	hsa00640:Propanoate metabolism	10	6.28931	5.39e-09	P24752, P80404, Q6NVY1, P30084, Q96I99, P00338, P40939, P07195, P30837, P05091	100	32	5085	15.8906	5.66e-07	2.83e-07	6.04e-06
SP_PIR_KEYWORDS	nad	14	8.80503	5.62e-09	P19404, P00367, P40926, P00338, Q99714, P07195, P30837, P05091, Q9UHQ9, P31937, P40939, P30038, Q16836, Q16795	159	189	19235	8.9611	2.02e-06	3.37e-07	7.72e-06
GOTERM_BP_FAT	GO:0045333~cellular respiration	12	7.54717	6.62e-09	P19404, P31930, P40926, O75874, P04179, P21912, Q96I99, P04040, Q99798, P36957, Q16795, P22695	146	97	13528	11.4628	9.62e-06	2.4e-06	1.1e-05
GOTERM_CC_FAT	GO:0031974~membrane-enclosed lumen	50	31.4465	8.24e-09	P46940, P24752, P00367, P60709, Q5QNZ2, P23246, P45954, Q9UI17, P80404, Q96I99, Q9UQ80, P36957, Q9UQE7, P40926, P49411, P02675, P78371, Q02218, Q07955, Q03252, P27144, P38117, P42704, P10809, P20700, P12694, P04179, P07237, Q16836, Q9UIJ7, P27797, P04040, P30837, P05091, P13667, O00264, P07996, Q16795, P62805, Q6NZI2, P50454, Q68CK6, P06576, P23284, Q08AH3, P30084, P40939, P30038, Q99798, P15144	149	1856	12782	2.31102	2.3e-06	2.87e-07	1.09e-05
GOTERM_CC_FAT	GO:0031967~organelle envelope	27	16.9811	9.71e-09	P24752, O95202, Q99714, P37802, P30086, Q5QNZ2, P04040, P23786, Q16795, P22695, P19404, P40926, P21912, Q9NX63, Q02218, Q6NUK1, Q03252, P13073, P06576, P31930, P42704, P10809, P20700, P04179, P40939, O75947, Q16836	149	620	12782	3.73581	2.71e-06	3.01e-07	1.28e-05
GOTERM_BP_FAT	GO:0006007~glucose catabolic process	10	6.28931	9.91e-09	P05062, P40926, P31937, P00558, P00338, P06733, P04075, P14618, Q02218, P07195	146	58	13528	15.9754	1.44e-05	2.88e-06	1.64e-05
GOTERM_CC_FAT	GO:0031975~envelope	27	16.9811	1.04e-08	P24752, O95202, Q99714, P37802, P30086, Q5QNZ2, P04040, P23786, Q16795, P22695, P19404, P40926, P21912, Q9NX63, Q02218, Q6NUK1, Q03252, P13073, P06576, P31930, P42704, P10809, P20700, P04179, P40939, O75947, Q16836	149	622	12782	3.7238	2.9e-06	2.9e-07	1.37e-05
UP_SEQ_FEATURE	nucleotide phosphate-binding region:NAD	10	6.28931	1.27e-08	P00367, P40926, P31937, P00338, Q99714, P30038, P07195, Q16836, P30837, P05091	159	76	19113	15.8168	9.43e-06	3.14e-06	1.93e-05
GOTERM_CC_FAT	GO:0043233~organelle lumen	49	30.8176	1.3e-08	P46940, P24752, P00367, P60709, Q5QNZ2, P23246, P45954, Q9UI17, P80404, Q96I99, Q9UQ80, P36957, Q9UQE7, P40926, P49411, P02675, P78371, Q02218, Q07955, Q03252, P27144, P42704, P38117, P10809, P20700, P12694, P04179, P07237, Q16836, Q9UIJ7, P27797, P30837, P05091, P13667, O00264, P07996, Q16795, P62805, Q6NZI2, P50454, Q68CK6, P06576, P23284, Q08AH3, P30084, P40939, P30038, Q99798, P15144	149	1820	12782	2.3096	3.64e-06	3.31e-07	1.72e-05
KEGG_PATHWAY	hsa00010:Glycolysis / Gluconeogenesis	12	7.54717	1.35e-08	P05062, P09467, P00558, P00338, P06733, P04075, Q16822, P14550, P14618, P07195, P30837, P05091	100	60	5085	10.17	1.42e-06	4.73e-07	1.51e-05
SP_PIR_KEYWORDS	tricarboxylic acid cycle	7	4.40252	1.37e-08	P40926, O75874, P21912, Q96I99, Q02218, Q99798, P36957	159	21	19235	40.3249	4.93e-06	7.04e-07	1.88e-05
GOTERM_BP_FAT	GO:0051186~cofactor metabolic process	15	9.43396	2.19e-08	P05062, P40926, P21912, P19440, P22352, P07195, P16152, P00491, P31937, O75874, P04179, Q96I99, Q99798, P36957, O60656	146	195	13528	7.1275	3.18e-05	5.29e-06	3.62e-05
GOTERM_MF_FAT	GO:0050662~coenzyme binding	15	9.43396	2.58e-08	P19404, P00367, Q99714, P07195, P04040, Q02218, P45954, Q9UI17, P31937, O75874, P40939, Q9UBQ7, P36957, Q16836, Q16795	153	181	12983	7.03228	1.07e-05	1.07e-05	3.62e-05
GOTERM_BP_FAT	GO:0006096~glycolysis	9	5.66038	3.17e-08	P05062, P40926, P00558, P00338, P06733, P04075, P14618, Q02218, P07195	146	47	13528	17.7429	4.6e-05	6.58e-06	5.25e-05
GOTERM_MF_FAT	GO:0048037~cofactor binding	17	10.6918	3.48e-08	P19404, P00367, P17174, Q99714, P07195, P04040, Q02218, P45954, Q9UI17, P80404, P31937, O75874, P40939, Q9UBQ7, P36957, Q16836, Q16795	153	249	12983	5.7934	1.44e-05	7.22e-06	4.88e-05
GOTERM_BP_FAT	GO:0010035~response to inorganic substance	15	9.43396	4.12e-08	P05062, P02675, P02452, P22352, P60709, Q92626, P30086, P04040, Q92820, P80404, P04179, Q92597, P07996, P32119, P00918	146	205	13528	6.77982	5.98e-05	7.47e-06	6.81e-05
GOTERM_BP_FAT	GO:0015980~energy derivation by oxidation of organic compounds	13	8.1761	4.5e-08	P19404, P40926, P21912, P17174, P04040, P31930, O75874, P04179, Q96I99, Q99798, P36957, Q16795, P22695	146	144	13528	8.36492	6.53e-05	7.26e-06	7.44e-05
GOTERM_BP_FAT	GO:0019320~hexose catabolic process	10	6.28931	4.77e-08	P05062, P40926, P31937, P00558, P00338, P06733, P04075, P14618, Q02218, P07195	146	69	13528	13.4286	6.93e-05	6.93e-06	7.9e-05
GOTERM_BP_FAT	GO:0046365~monosaccharide catabolic process	10	6.28931	6.16e-08	P05062, P40926, P31937, P00558, P00338, P06733, P04075, P14618, Q02218, P07195	146	71	13528	13.0504	8.95e-05	8.13e-06	0.000102
SP_PIR_KEYWORDS	glycolysis	8	5.03145	6.56e-08	P05062, P00558, P00338, P06733, P04075, P14618, Q02218, P07195	159	44	19235	21.9954	2.36e-05	2.95e-06	9e-05
GOTERM_MF_FAT	GO:0005198~structural molecule activity	26	16.3522	8.29e-08	P07951, Q9Y6C2, P60709, Q9Y4G6, Q7Z794, P48681, P13645, P08670, P07942, P11047, P17661, P07996, P12110, P04083, P02452, P41219, P39059, P51888, Q03252, O15230, P24844, P20700, P35908, P67936, P68133, Q16181	153	634	12983	3.47991	3.44e-05	1.15e-05	0.000116
GOTERM_BP_FAT	GO:0006732~coenzyme metabolic process	13	8.1761	8.81e-08	P05062, P40926, P21912, P19440, P22352, P07195, P00491, P31937, O75874, P04179, Q96I99, Q99798, P36957	146	153	13528	7.87286	0.000128	1.07e-05	0.000146
GOTERM_BP_FAT	GO:0006006~glucose metabolic process	13	8.1761	8.81e-08	P05062, P09467, P40926, P04075, P06733, P00338, P07195, Q02218, P31937, P00558, P14550, Q16822, P14618	146	153	13528	7.87286	0.000128	1.07e-05	0.000146
UP_SEQ_FEATURE	region of interest:Coil 1A	9	5.66038	1.12e-07	Q7Z794, Q03252, P48681, P13645, P20700, P08670, P35908, P17661, P41219	159	70	19113	15.4553	8.27e-05	2.07e-05	0.00017
UP_SEQ_FEATURE	region of interest:Coil 1B	9	5.66038	1.12e-07	Q7Z794, Q03252, P48681, P13645, P20700, P08670, P35908, P17661, P41219	159	70	19113	15.4553	8.27e-05	2.07e-05	0.00017
UP_SEQ_FEATURE	region of interest:Linker 1	9	5.66038	1.12e-07	Q7Z794, Q03252, P48681, P13645, P20700, P08670, P35908, P17661, P41219	159	70	19113	15.4553	8.27e-05	2.07e-05	0.00017
UP_SEQ_FEATURE	region of interest:Rod	9	5.66038	1.25e-07	Q7Z794, Q03252, P48681, P13645, P20700, P08670, P35908, P17661, P41219	159	71	19113	15.2376	9.26e-05	1.85e-05	0.00019
SP_PIR_KEYWORDS	acetylated amino end	10	6.28931	1.36e-07	P62736, P04083, P16403, P68133, P14618, P17661, P08758, P07195, P00918, P62805	159	100	19235	12.0975	4.9e-05	5.45e-06	0.000187
UP_SEQ_FEATURE	region of interest:Head	9	5.66038	1.56e-07	Q7Z794, Q03252, P48681, P13645, P20700, P08670, P35908, P17661, P41219	159	73	19113	14.8201	0.000115	1.92e-05	0.000236
GOTERM_CC_FAT	GO:0070013~intracellular organelle lumen	46	28.9308	1.58e-07	P46940, P24752, P00367, Q9UIJ7, P27797, P60709, Q5QNZ2, P23246, P30837, P05091, P13667, P45954, Q9UI17, P80404, O00264, Q96I99, Q9UQ80, Q9UQE7, P36957, Q16795, P62805, Q6NZI2, P40926, P49411, P78371, P50454, Q02218, Q68CK6, Q07955, Q03252, P06576, P27144, P38117, P42704, Q08AH3, P20700, P10809, P23284, P12694, P04179, P30084, P07237, P40939, P30038, Q99798, Q16836	149	1779	12782	2.21817	4.4e-05	3.67e-06	0.000208
INTERPRO	IPR016040:NAD(P)-binding domain	12	7.54717	1.66e-07	P00367, P40926, P31937, P00338, P40939, Q08257, Q99714, Q9UBQ7, P07195, Q16836, Q16795, P16152	157	150	16659	8.48866	6.61e-05	6.61e-05	0.000232
UP_SEQ_FEATURE	region of interest:Tail	9	5.66038	1.93e-07	Q7Z794, Q03252, P48681, P13645, P20700, P08670, P35908, P17661, P41219	159	75	19113	14.4249	0.000143	2.04e-05	0.000293
GOTERM_BP_FAT	GO:0046164~alcohol catabolic process	10	6.28931	1.97e-07	P05062, P40926, P31937, P00558, P00338, P06733, P04075, P14618, Q02218, P07195	146	81	13528	11.4392	0.000286	2.2e-05	0.000326
SP_PIR_KEYWORDS	Intermediate filament	9	5.66038	2.5e-07	Q7Z794, Q03252, P48681, P13645, P20700, P08670, P35908, P17661, P41219	159	78	19235	13.9586	9e-05	9e-06	0.000343
GOTERM_BP_FAT	GO:0016052~carbohydrate catabolic process	11	6.91824	2.53e-07	P05062, P40926, P31937, P00558, P00338, P06733, P04075, P14550, P14618, Q02218, P07195	146	109	13528	9.35076	0.000367	2.62e-05	0.000418
GOTERM_BP_FAT	GO:0044275~cellular carbohydrate catabolic process	10	6.28931	3e-07	P05062, P40926, P31937, P00558, P00338, P06733, P04075, P14618, Q02218, P07195	146	85	13528	10.9009	0.000435	2.9e-05	0.000496
GOTERM_BP_FAT	GO:0046395~carboxylic acid catabolic process	11	6.91824	3e-07	P00367, Q9UI17, Q6NVY1, P23786, P12694, P17174, P30084, P40939, Q13011, P14550, P30038	146	111	13528	9.18228	0.000436	2.72e-05	0.000497
GOTERM_BP_FAT	GO:0016054~organic acid catabolic process	11	6.91824	3e-07	P00367, Q9UI17, Q6NVY1, P23786, P12694, P17174, P30084, P40939, Q13011, P14550, P30038	146	111	13528	9.18228	0.000436	2.72e-05	0.000497
INTERPRO	IPR018039:Intermediate filament protein, conserved site	9	5.66038	3.56e-07	Q7Z794, Q03252, P48681, P13645, P20700, P08670, P35908, P17661, P41219	157	72	16659	13.2635	0.000141	7.06e-05	0.000496
INTERPRO	IPR016044:Filament	9	5.66038	3.56e-07	Q7Z794, Q03252, P48681, P13645, P20700, P08670, P35908, P17661, P41219	157	72	16659	13.2635	0.000141	7.06e-05	0.000496
INTERPRO	IPR001664:Intermediate filament protein	9	5.66038	3.96e-07	Q7Z794, Q03252, P48681, P13645, P20700, P08670, P35908, P17661, P41219	157	73	16659	13.0818	0.000157	5.25e-05	0.000552
KEGG_PATHWAY	hsa00620:Pyruvate metabolism	9	5.66038	7.14e-07	P24752, P40926, P00338, Q16822, Q9UBQ7, P14618, P07195, P30837, P05091	100	40	5085	11.4413	7.5e-05	1.88e-05	0.0008
SP_PIR_KEYWORDS	fatty acid metabolism	8	5.03145	7.43e-07	P45954, Q08AH3, P23786, P30084, P40939, Q13011, Q16836, Q68CK6	159	62	19235	15.6097	0.000268	2.43e-05	0.00102112
GOTERM_BP_FAT	GO:0051187~cofactor catabolic process	7	4.40252	8.07e-07	P40926, O75874, P21912, Q96I99, Q99798, P36957, O60656	146	31	13528	20.9227	0.0011711	6.89e-05	0.0013356
SP_PIR_KEYWORDS	blocked amino end	9	5.66038	9e-07	P12110, P12109, P37235, P00558, P35237, P04040, P68871, P13796, P16152	159	92	19235	11.8345	0.000324	2.7e-05	0.0012365
GOTERM_BP_FAT	GO:0019318~hexose metabolic process	13	8.1761	1.03e-06	P05062, P09467, P40926, P04075, P06733, P00338, P07195, Q02218, P31937, P00558, P14550, Q16822, P14618	146	192	13528	6.27369	0.00149712	8.32e-05	0.00170769
UP_SEQ_FEATURE	binding site:Substrate; via amide nitrogen	6	3.77358	1.08e-06	P45954, Q6NVY1, P30084, Q13011, Q16822, P14618	159	23	19113	31.3585	0.000801	0.0001	0.00164259
GOTERM_MF_FAT	GO:0051287~NAD or NADH binding	8	5.03145	1.12e-06	P19404, P00367, P31937, O75874, P40939, Q99714, Q9UBQ7, P07195	153	47	12983	14.4436	0.000463	0.000116	0.00156368
KEGG_PATHWAY	hsa00020:Citrate cycle (TCA cycle)	8	5.03145	1.54e-06	P40926, O75874, P21912, Q96I99, Q16822, Q02218, Q99798, P36957	100	31	5085	13.1226	0.000161	3.23e-05	0.0017209
UP_SEQ_FEATURE	region of interest:Linker 2	5	3.14465	2.11e-06	Q03252, P48681, P20700, P17661, P41219	159	12	19113	50.0865	0.00156482	0.000174	0.00321139
UP_SEQ_FEATURE	sequence variant	127	79.8742	2.76e-06	P46940, P24752, Q07065, P00367, Q99714, P37802, Q7Z794, P80404, P13645, Q08257, Q16822, P17661, Q9UQE7, P22695, P19404, P98164, P49411, P43121, P22352, Q13011, Q03252, P13073, Q8IUX7, P42704, O15230, Q6NVY1, P55290, P16403, P00558, P67936, P01891, Q16836, P13796, P07951, P04075, Q9Y4G6, P16152, P13667, P48681, P00491, P07942, P05062, P02452, P00338, P07195, P50454, P35237, P07585, P06576, P31930,…	159	11992	19113	1.27305	0.00203957	0.000204	0.00418668
GOTERM_CC_FAT	GO:0015629~actin cytoskeleton	15	9.43396	2.83e-06	P46940, P62736, O14745, P07951, P04075, Q9Y4G6, P35579, P40121, Q7Z406, P24844, P67936, P68133, Q14847, P13796, Q16181	149	269	12782	4.78356	0.00079	6.08e-05	0.00374213
KEGG_PATHWAY	hsa00650:Butanoate metabolism	8	5.03145	3e-06	P24752, P80404, Q08AH3, P30084, P40939, Q16836, P30837, P05091	100	34	5085	11.9647	0.000315	5.24e-05	0.0033562
UP_SEQ_FEATURE	binding site:NAD	7	4.40252	3.41e-06	P00367, P40926, P31937, P00338, Q99714, P07195, Q16836	159	50	19113	16.8291	0.00252664	0.00023	0.00518774
GOTERM_BP_FAT	GO:0046356~acetyl-CoA catabolic process	6	3.77358	3.8e-06	P40926, O75874, P21912, Q96I99, Q99798, P36957	146	23	13528	24.1715	0.00550608	0.000291	0.00629301
GOTERM_BP_FAT	GO:0006099~tricarboxylic acid cycle	6	3.77358	3.8e-06	P40926, O75874, P21912, Q96I99, Q99798, P36957	146	23	13528	24.1715	0.00550608	0.000291	0.00629301
GOTERM_BP_FAT	GO:0006769~nicotinamide metabolic process	7	4.40252	3.89e-06	P05062, P40926, P00491, P31937, O75874, P07195, P36957	146	40	13528	16.2151	0.00562681	0.000282	0.00643138
GOTERM_BP_FAT	GO:0046496~nicotinamide nucleotide metabolic process	7	4.40252	3.89e-06	P05062, P40926, P00491, P31937, O75874, P07195, P36957	146	40	13528	16.2151	0.00562681	0.000282	0.00643138
GOTERM_BP_FAT	GO:0009820~alkaloid metabolic process	7	4.40252	4.51e-06	P05062, P40926, P00491, P31937, O75874, P07195, P36957	146	41	13528	15.8196	0.00653061	0.000312	0.00746777
SP_PIR_KEYWORDS	mitochondrion inner membrane	11	6.91824	4.53e-06	P19404, Q6NUK1, P13073, P06576, P31930, P23786, P21912, O95202, O75947, Q5QNZ2, P22695	159	193	19235	6.89494	0.00162849	0.000125	0.00621758
GOTERM_BP_FAT	GO:0005996~monosaccharide metabolic process	13	8.1761	4.7e-06	P05062, P09467, P40926, P04075, P06733, P00338, P07195, Q02218, P31937, P00558, P14550, Q16822, P14618	146	222	13528	5.42589	0.00680225	0.00031	0.00777944
SP_PIR_KEYWORDS	extracellular matrix	12	7.54717	5.07e-06	P51888, P07585, P12110, P12109, O15230, Q9Y6C2, P02452, P27797, P07942, Q92626, P11047, P39059	159	241	19235	6.02364	0.00182353	0.00013	0.00696289
GOTERM_BP_FAT	GO:0019362~pyridine nucleotide metabolic process	7	4.40252	5.22e-06	P05062, P40926, P00491, P31937, O75874, P07195, P36957	146	42	13528	15.4429	0.00754835	0.000329	0.00863592
SP_PIR_KEYWORDS	lyase	9	5.66038	5.91e-06	P05062, Q3LXA3, P30084, P40939, P06733, P04075, Q16822, Q99798, P00918	159	118	19235	9.22689	0.00212512	0.000142	0.00811567
GOTERM_BP_FAT	GO:0009109~coenzyme catabolic process	6	3.77358	7.24e-06	P40926, O75874, P21912, Q96I99, Q99798, P36957	146	26	13528	21.3825	0.0104624	0.000438	0.0119873
GOTERM_BP_FAT	GO:0010033~response to organic substance	23	14.4654	8.33e-06	P05062, P09467, P12110, P17174, P02452, P30086, P50454, Q92820, P05091, P27144, P80404, P31930, P55290, P10809, O75874, P12694, P68133, P08758, P07996, P04792, P32119, O60656, P00918	146	721	13528	2.95579	0.0120281	0.000484	0.0137919
GOTERM_CC_FAT	GO:0048770~pigment granule	9	5.66038	8.55e-06	P13667, P40121, P23284, P07237, P04843, P07339, P30086, P05023, Q92820	149	89	12782	8.67491	0.00238313	0.00017	0.0113007
GOTERM_CC_FAT	GO:0042470~melanosome	9	5.66038	8.55e-06	P13667, P40121, P23284, P07237, P04843, P07339, P30086, P05023, Q92820	149	89	12782	8.67491	0.00238313	0.00017	0.0113007
KEGG_PATHWAY	hsa00380:Tryptophan metabolism	8	5.03145	9.44e-06	P24752, P30084, P40939, Q02218, P04040, Q16836, P30837, P05091	100	40	5085	10.17	0.00099	0.000142	0.0105703
KEGG_PATHWAY	hsa00071:Fatty acid metabolism	8	5.03145	9.44e-06	P45954, P24752, P23786, P30084, P40939, Q16836, P30837, P05091	100	40	5085	10.17	0.00099	0.000142	0.0105703
SP_PIR_KEYWORDS	muscle protein	7	4.40252	9.69e-06	P62736, P24844, P07951, P67936, P68133, P17661, Q01995	159	60	19235	14.1137	0.00348393	0.000218	0.0133136
UP_SEQ_FEATURE	region of interest:Coil 2	7	4.40252	1.46e-05	Q7Z794, Q03252, P13645, P20700, P08670, P35908, P41219	159	64	19113	13.1477	0.0107926	0.000904	0.0222499
SP_PIR_KEYWORDS	gluconeogenesis	5	3.14465	1.54e-05	P05062, P09467, P00558, P04075, Q16822	159	19	19235	31.8355	0.0055394	0.000327	0.0211894
GOTERM_BP_FAT	GO:0006084~acetyl-CoA metabolic process	6	3.77358	1.79e-05	P40926, O75874, P21912, Q96I99, Q99798, P36957	146	31	13528	17.9337	0.0256847	0.00100028	0.0296538
KEGG_PATHWAY	hsa00310:Lysine degradation	8	5.03145	1.82e-05	P24752, P30084, P40939, Q02218, P36957, Q16836, P30837, P05091	100	44	5085	9.24545	0.00190923	0.000239	0.0203847
GOTERM_BP_FAT	GO:0006733~oxidoreduction coenzyme metabolic process	7	4.40252	1.85e-05	P05062, P40926, P00491, P31937, O75874, P07195, P36957	146	52	13528	12.4731	0.0265684	0.000997	0.0306877
GOTERM_CC_FAT	GO:0031090~organelle membrane	30	18.8679	1.92e-05	P24752, O95202, Q99714, P30086, P37802, Q5QNZ2, P04040, P23786, P04843, Q16795, P22695, P19404, P40926, P21912, Q02218, Q9NX63, Q6NUK1, Q03252, P13073, P06576, P31930, P42704, P10809, P20700, P04179, P40939, P01891, O75947, P05534, P15144, Q16836	149	1096	12782	2.34814	0.0053553	0.000358	0.0254307
SP_PIR_KEYWORDS	calcium binding	8	5.03145	2.26e-05	P04083, P55290, P27797, P07942, P11047, P08758, P07996, P13796	159	103	19235	9.3961	0.00810706	0.000452	0.0310498
GOTERM_BP_FAT	GO:0043603~cellular amide metabolic process	7	4.40252	2.86e-05	P05062, P40926, P00491, P31937, O75874, P07195, P36957	146	56	13528	11.5822	0.040613	0.00147964	0.0472461
SP_PIR_KEYWORDS	pyroglutamic acid	6	3.77358	3.67e-05	P12110, P12109, P01857, P02675, P22352, P02452	159	46	19235	15.7793	0.0131102	0.000694	0.0503339
GOTERM_CC_FAT	GO:0005856~cytoskeleton	34	21.3836	3.73e-05	P62736, P46940, O14745, P07951, P04075, P60709, P30086, Q9Y4G6, P48681, Q7Z794, P40121, P00491, P13645, P08670, P17661, Q9UQE7, P05062, P04083, P35579, Q562R1, P41219, Q03252, P42704, P20700, Q7Z406, P24844, P35908, P67936, P68133, Q92597, Q14847, P13796, P04792, Q16181	149	1381	12782	2.11202	0.0103625	0.000651	0.0493269
GOTERM_BP_FAT	GO:0048545~response to steroid hormone stimulus	11	6.91824	4.12e-05	P05062, O75874, P12694, P17174, P02452, P68133, P30086, P07996, O60656, P00918, P05091	146	192	13528	5.3085	0.058068	0.00206071	0.0681625
GOTERM_CC_FAT	GO:0000267~cell fraction	29	18.239	4.17e-05	Q07065, P09467, P17174, P27797, P60709, Q03154, P30086, P80404, P01857, P01859, O00264, Q08257, P17661, P05023, P36957, P16662, O60656, Q6NZI2, P98164, P08473, P02675, P22352, P07195, O75874, P04179, P07237, P15144, P04792, P12821	149	1083	12782	2.29711	0.0115785	0.000685	0.0551471
PIR_SUPERFAMILY	PIRSF002282:cytoskeletal keratin	8	5.03145	4.22e-05	Q7Z794, Q03252, P13645, P20700, P08670, P35908, P17661, P41219	117	61	7396	8.29032	0.00479808	0.00479808	0.0479694
GOTERM_CC_FAT	GO:0044449~contractile fiber part	9	5.66038	4.91e-05	P62736, P24844, P07951, P06733, P04075, P67936, P68133, P17661, P04792	149	113	12782	6.83245	0.0135939	0.00076	0.0648091
UP_SEQ_FEATURE	site:Transition state stabilizer	5	3.14465	4.97e-05	Q92626, P30038, P14618, P30837, P05091	159	25	19113	24.0415	0.0361353	0.0028271	0.0754452
KEGG_PATHWAY	hsa00410:beta-Alanine metabolism	6	3.77358	5.12e-05	P80404, Q6NVY1, P30084, P40939, P30837, P05091	100	22	5085	13.8682	0.00535935	0.000597	0.0573101
GOTERM_BP_FAT	GO:0010038~response to metal ion	9	5.66038	7.34e-05	P05062, P80404, P02675, P60709, P30086, Q92597, P07996, Q92820, P00918	146	129	13528	6.46448	0.101119	0.00354717	0.121435
GOTERM_CC_FAT	GO:0043292~contractile fiber	9	5.66038	7.98e-05	P62736, P24844, P07951, P06733, P04075, P67936, P68133, P17661, P04792	149	121	12782	6.38072	0.0220198	0.0011712	0.105409
GOTERM_BP_FAT	GO:0006119~oxidative phosphorylation	8	5.03145	8.62e-05	P19404, P06576, P31930, O75947, Q5QNZ2, P36543, Q16795, P22695	146	98	13528	7.56388	0.117664	0.00403001	0.142582
GOTERM_BP_FAT	GO:0065003~macromolecular complex assembly	20	12.5786	8.84e-05	Q6NZI2, P05062, O60814, O14745, P02675, P22352, P27797, Q99714, P30086, P04040, Q07955, P40121, P0C0S5, P16403, P10809, P04179, P11047, P08758, P62805, Q16181	146	665	13528	2.78669	0.120476	0.00400366	0.146215
UP_SEQ_FEATURE	region of interest:Substrate binding	8	5.03145	0.000104	P45954, P09467, P00558, O75874, P30084, P06733, Q16822, Q9UBQ7	159	130	19113	7.39739	0.0743279	0.00550161	0.158259
GOTERM_BP_FAT	GO:0042493~response to drug	11	6.91824	0.000111	Q5T2W1, P48681, P98164, P80404, P00491, P04179, P40939, P30086, P05023, Q92820, O60656	146	216	13528	4.71867	0.148262	0.00485111	0.182745
GOTERM_BP_FAT	GO:0009719~response to endogenous stimulus	15	9.43396	0.000115	P05062, P09467, P17174, P02452, P30086, Q92820, P05091, P27144, P55290, O75874, P12694, P68133, P07996, O60656, P00918	146	405	13528	3.43176	0.153211	0.00487934	0.189375
SP_PIR_KEYWORDS	duplication	10	6.28931	0.000115	P46940, P13667, P07585, P04083, P55290, P01857, P01859, P07237, P01891, P05534, P08758	159	228	19235	5.30591	0.0405092	0.00206549	0.157636
UP_SEQ_FEATURE	site:Important for catalytic activity	4	2.51572	0.000115	P30084, P40939, Q13011, Q16836	159	12	19113	40.0692	0.0819917	0.00568703	0.175279
INTERPRO	IPR018376:Enoyl-CoA hydratase/isomerase, conserved site	4	2.51572	0.000126	Q6NVY1, P30084, P40939, Q13011	157	11	16659	38.5848	0.0487111	0.0124068	0.175103
GOTERM_BP_FAT	GO:0009991~response to extracellular stimulus	11	6.91824	0.000129	P05062, P13073, P48681, P98164, P04179, P12694, P00338, P02452, P68133, P07339, O60656	146	220	13528	4.63288	0.170266	0.00531867	0.212519
GOTERM_BP_FAT	GO:0019674~NAD metabolic process	5	3.14465	0.000134	P05062, P40926, P00491, P07195, P36957	146	25	13528	18.5315	0.177351	0.00540825	0.222272
GOTERM_BP_FAT	GO:0042743~hydrogen peroxide metabolic process	5	3.14465	0.000134	P04179, P22352, Q92626, P04040, P32119	146	25	13528	18.5315	0.177351	0.00540825	0.222272
GOTERM_MF_FAT	GO:0016836~hydro-lyase activity	6	3.77358	0.000155	P30084, P40939, P06733, Q13011, Q99798, P00918	153	44	12983	11.5713	0.0622133	0.0127644	0.216806
SP_PIR_KEYWORDS	muscle	4	2.51572	0.000185	P07951, P04075, P14618, P17661	159	14	19235	34.5642	0.0645069	0.00317028	0.254068
UP_SEQ_FEATURE	region of interest:Linker 12	6	3.77358	0.000186	Q7Z794, P48681, P13645, P08670, P35908, P17661	159	64	19113	11.2695	0.129046	0.00859824	0.282934
UP_SEQ_FEATURE	binding site:Coenzyme A	4	2.51572	0.000189	P24752, Q08AH3, Q16836, Q68CK6	159	14	19113	34.345	0.130502	0.00819207	0.286353
UP_SEQ_FEATURE	region of interest:Coenzyme A binding	4	2.51572	0.000189	P24752, Q08AH3, P23786, Q68CK6	159	14	19113	34.345	0.130502	0.00819207	0.286353
GOTERM_BP_FAT	GO:0019748~secondary metabolic process	7	4.40252	0.0002	P05062, P40926, P00491, P31937, O75874, P07195, P36957	146	79	13528	8.21016	0.251794	0.00780926	0.330085
GOTERM_BP_FAT	GO:0043933~macromolecular complex subunit organization	20	12.5786	0.000207	Q6NZI2, P05062, O60814, O14745, P02675, P22352, P27797, Q99714, P30086, P04040, Q07955, P40121, P0C0S5, P16403, P10809, P04179, P11047, P08758, P62805, Q16181	146	710	13528	2.61007	0.259365	0.00787011	0.341639
SP_PIR_KEYWORDS	cell binding	4	2.51572	0.00023	P12110, P12109, P07942, P11047	159	15	19235	32.26	0.0795126	0.00375892	0.315583
GOTERM_BP_FAT	GO:0006518~peptide metabolic process	6	3.77358	0.00025	P08473, O75874, P04179, P22352, P19440, P12821	146	53	13528	10.4895	0.304922	0.00928309	0.413725
SP_PIR_KEYWORDS	lipid metabolism	8	5.03145	0.000254	P45954, Q08AH3, P23786, P30084, P40939, Q13011, Q16836, Q68CK6	159	151	19235	6.40926	0.0872416	0.00396101	0.347645
GOTERM_BP_FAT	GO:0034614~cellular response to reactive oxygen species	5	3.14465	0.000279	P04179, P22352, Q92626, P04040, P32119	146	30	13528	15.4429	0.333515	0.0100922	0.461394
GOTERM_CC_FAT	GO:0005625~soluble fraction	13	8.1761	0.000281	P09467, P02675, P17174, P22352, P60709, Q03154, P30086, P07195, O75874, P04179, Q08257, P15144, P04792	149	313	12782	3.56297	0.0753999	0.00391202	0.370631
SP_PIR_KEYWORDS	polymorphism	117	73.5849	0.000287	P46940, P24752, Q07065, P37802, Q7Z794, P80404, P13645, Q08257, Q16822, P22695, P19404, P98164, P43121, P22352, Q13011, Q03252, P13073, Q8IUX7, P42704, O15230, Q6NVY1, P55290, P16403, P00558, P67936, P01891, Q16836, P13796, P07951, P04075, Q9Y4G6, P16152, P13667, P48681, P00491, P07942, P05062, P02452, P00338, P07195, P50454, P35237, P07585, P06576, P31930, P23284, O75874, P40939, P35908, Q9UBQ7,…	159	11550	19235	1.22546	0.0982986	0.00430205	0.393969
GOTERM_BP_FAT	GO:0042542~response to hydrogen peroxide	6	3.77358	0.000325	P04179, P22352, P02452, Q92626, P04040, P32119	146	56	13528	9.92759	0.376168	0.0114431	0.536401
INTERPRO	IPR001753:Crotonase, core	4	2.51572	0.000337	Q6NVY1, P30084, P40939, Q13011	157	15	16659	28.2955	0.125392	0.0264401	0.469099
GOTERM_MF_FAT	GO:0043498~cell surface binding	5	3.14465	0.000341	P06576, P02675, P10809, P08758, P07996	153	29	12983	14.6304	0.132154	0.0233466	0.477793
SP_PIR_KEYWORDS	phosphoprotein	82	51.5723	0.000357	P46940, Q07065, P00367, O60814, O14745, P17174, P06733, P60709, Q92626, P37802, P23246, Q9H4M9, P16444, Q7Z794, P13645, Q9UQ80, Q16822, P17661, P08758, Q9UQE7, P05023, P36543, P22695, P98164, P04083, P40926, P43121, Q13011, Q9NX63, Q07960, P35579, P41219, Q07955, Q03252, O15230, P55290, P20700, Q7Z406, P10809, P16403, P00558, P12694, P67936, P01891, Q14847, P04792, P13796, Q16181, P62736, P07951,…	159	7263	19235	1.36582	0.120726	0.00513315	0.489634
SP_PIR_KEYWORDS	FAD	7	4.40252	0.000359	P45954, Q9UHQ9, Q9UI17, Q9UHG3, P38117, Q3LXA3, Q16795	159	114	19235	7.42828	0.121215	0.00495746	0.491742
UP_SEQ_FEATURE	active site:Proton acceptor	16	10.0629	0.000376	P24752, P05062, P40926, P00338, P04075, P06733, Q03154, Q99714, Q92626, P07195, P30837, P16152, P05091, P45954, P23786, P30038	159	658	19113	2.92298	0.242948	0.0153435	0.569125
GOTERM_BP_FAT	GO:0006754~ATP biosynthetic process	7	4.40252	0.000383	P06576, Q9UIJ7, P04075, O75947, Q5QNZ2, P05023, P36543	146	89	13528	7.28767	0.426293	0.0131423	0.631317
GOTERM_CC_FAT	GO:0043259~laminin-10 complex	3	1.88679	0.000396	O15230, P07942, P11047	149	3	12782	85.7852	0.104738	0.00525465	0.522678
SP_PIR_KEYWORDS	heat shock	3	1.88679	0.000398	P10809, P50454, P04792	159	4	19235	90.7311	0.1335	0.00529312	0.545176
INTERPRO	IPR004001:Actin, conserved site	4	2.51572	0.000412	P62736, P68133, P60709, Q562R1	157	16	16659	26.5271	0.151066	0.0269264	0.573117
GOTERM_MF_FAT	GO:0005201~extracellular matrix structural constituent	7	4.40252	0.000508	P51888, P12110, Q9Y6C2, P02452, P07942, P11047, P39059	153	86	12983	6.9069	0.189966	0.0296486	0.709352
COG_ONTOLOGY	Lipid metabolism	7	4.40252	0.000545	P45954, Q6NVY1, Q08AH3, P30084, Q13011, Q16836, Q68CK6	34	64	1950	6.27298	0.00760482	0.00760482	0.369717
SP_PIR_KEYWORDS	methylated amino acid	4	2.51572	0.000559	P62736, P68133, P60709, P62805	159	20	19235	24.195	0.182457	0.00716887	0.765595
SP_PIR_KEYWORDS	metalloprotein	7	4.40252	0.000562	P19404, P04179, P02042, P14618, P04040, P68871, P00918	159	124	19235	6.82922	0.183171	0.00695245	0.768902
GOTERM_BP_FAT	GO:0009725~response to hormone stimulus	13	8.1761	0.000588	P05062, P09467, P17174, P02452, P30086, Q92820, P05091, O75874, P12694, P68133, P07996, O60656, P00918	146	367	13528	3.28215	0.574446	0.0196728	0.969083
GOTERM_BP_FAT	GO:0009206~purine ribonucleoside triphosphate biosynthetic process	7	4.40252	0.000641	P06576, Q9UIJ7, P04075, O75947, Q5QNZ2, P05023, P36543	146	98	13528	6.6184	0.605616	0.0209241	1.05491
GOTERM_CC_FAT	GO:0044421~extracellular region part	24	15.0943	0.000657	P98164, P12110, Q9UHG3, P02675, P22352, P02452, P27797, P04075, Q9Y6C2, P30086, Q92820, P39059, P51888, P07585, O15230, P55290, P12109, P10809, P07942, P11047, Q9UQE7, P07996, P12821, P00918	149	960	12782	2.14463	0.167491	0.00829774	0.864512
GOTERM_CC_FAT	GO:0031012~extracellular matrix	13	8.1761	0.000672	P12110, Q9Y6C2, P27797, P02452, P39059, P51888, P07585, P12109, O15230, P07942, P11047, Q9UQE7, P07996	149	345	12782	3.23249	0.171044	0.00812284	0.884591
GOTERM_BP_FAT	GO:0009145~purine nucleoside triphosphate biosynthetic process	7	4.40252	0.000676	P06576, Q9UIJ7, P04075, O75947, Q5QNZ2, P05023, P36543	146	99	13528	6.55154	0.625386	0.0215828	1.11289
GOTERM_BP_FAT	GO:0009201~ribonucleoside triphosphate biosynthetic process	7	4.40252	0.000676	P06576, Q9UIJ7, P04075, O75947, Q5QNZ2, P05023, P36543	146	99	13528	6.55154	0.625386	0.0215828	1.11289
GOTERM_BP_FAT	GO:0042744~hydrogen peroxide catabolic process	4	2.51572	0.000735	P22352, Q92626, P04040, P32119	146	17	13528	21.8018	0.655974	0.0229295	1.20885
GOTERM_BP_FAT	GO:0044271~nitrogen compound biosynthetic process	12	7.54717	0.000752	P06576, P00367, Q9UIJ7, P00491, P17174, P04075, P30038, O75947, Q93088, Q5QNZ2, P05023, P36543	146	325	13528	3.4212	0.664482	0.0229678	1.23704
GOTERM_BP_FAT	GO:0009142~nucleoside triphosphate biosynthetic process	7	4.40252	0.000791	P06576, Q9UIJ7, P04075, O75947, Q5QNZ2, P05023, P36543	146	102	13528	6.35885	0.683191	0.0236626	1.30161
GOTERM_BP_FAT	GO:0009063~cellular amino acid catabolic process	6	3.77358	0.0008	P00367, Q9UI17, Q6NVY1, P12694, P17174, P30038	146	68	13528	8.17566	0.687204	0.0234394	1.31595
GOTERM_BP_FAT	GO:0070301~cellular response to hydrogen peroxide	4	2.51572	0.000875	P22352, Q92626, P04040, P32119	146	18	13528	20.5906	0.719314	0.0250903	1.43771
KEGG_PATHWAY	hsa00190:Oxidative phosphorylation	10	6.28931	0.000876	P19404, P13073, P06576, P31930, P21912, O75947, Q5QNZ2, P36543, Q16795, P22695	100	130	5085	3.91154	0.087876	0.00915577	0.976424
GOTERM_BP_FAT	GO:0046034~ATP metabolic process	7	4.40252	0.000921	P06576, Q9UIJ7, P04075, O75947, Q5QNZ2, P05023, P36543	146	105	13528	6.17717	0.737725	0.025901	1.5139
GOTERM_MF_FAT	GO:0043499~eukaryotic cell surface binding	4	2.51572	0.000948	P06576, P02675, P08758, P07996	153	17	12983	19.9662	0.325499	0.048031	1.32177
GOTERM_CC_FAT	GO:0030017~sarcomere	7	4.40252	0.000956	P07951, P06733, P04075, P67936, P68133, P17661, P04792	149	98	12782	6.12752	0.234119	0.0110521	1.25543
SP_PIR_KEYWORDS	tetramer	3	1.88679	0.000984	P05062, P04075, P07195	159	6	19235	60.4874	0.298462	0.0117465	1.34325
UP_SEQ_FEATURE	metal ion-binding site:Potassium	3	1.88679	0.000997	P24752, P12694, P14618	159	6	19113	60.1038	0.522354	0.0381423	1.50379
GOTERM_BP_FAT	GO:0006090~pyruvate metabolic process	5	3.14465	0.001033	P05062, P09467, P00338, Q16822, P07195	146	42	13528	11.0307	0.777023	0.0284469	1.69595
GOTERM_BP_FAT	GO:0006461~protein complex assembly	15	9.43396	0.00105452	Q6NZI2, P05062, O14745, P02675, P27797, P22352, Q99714, P30086, P04040, P40121, P10809, P04179, P11047, P08758, Q16181	146	505	13528	2.7522	0.783891	0.0284914	1.731
GOTERM_BP_FAT	GO:0070271~protein complex biogenesis	15	9.43396	0.00105452	Q6NZI2, P05062, O14745, P02675, P27797, P22352, Q99714, P30086, P04040, P40121, P10809, P04179, P11047, P08758, Q16181	146	505	13528	2.7522	0.783891	0.0284914	1.731
SP_PIR_KEYWORDS	peroxidase	4	2.51572	0.00109521	P22352, Q92626, P04040, P32119	159	25	19235	19.356	0.325977	0.0126449	1.49372
GOTERM_BP_FAT	GO:0034599~cellular response to oxidative stress	5	3.14465	0.00112955	P04179, P22352, Q92626, P04040, P32119	146	43	13528	10.7741	0.806221	0.0299325	1.85308
KEGG_PATHWAY	hsa05010:Alzheimer's disease	11	6.91824	0.00115682	P19404, P13073, P06576, P08473, P31930, P21912, Q99714, O75947, Q5QNZ2, Q16795, P22695	100	163	5085	3.4316	0.114441	0.0109879	1.28816
SP_PIR_KEYWORDS	trimer	4	2.51572	0.00123064	P12110, P12109, P02452, P07996	159	26	19235	18.6115	0.358087	0.0137577	1.67699
GOTERM_CC_FAT	GO:0005578~proteinaceous extracellular matrix	12	7.54717	0.0012381	P51888, P07585, P12110, P12109, O15230, Q9Y6C2, P02452, P27797, P07942, P11047, Q9UQE7, P39059	149	320	12782	3.21695	0.292235	0.0137306	1.62383
GOTERM_BP_FAT	GO:0000302~response to reactive oxygen species	6	3.77358	0.00124778	P04179, P22352, P02452, Q92626, P04040, P32119	146	75	13528	7.4126	0.836822	0.0324248	2.04517
GOTERM_BP_FAT	GO:0031667~response to nutrient levels	9	5.66038	0.00127608	P05062, P13073, P48681, P98164, P04179, P12694, P02452, P07339, O60656	146	197	13528	4.23309	0.843399	0.0325661	2.09109
GOTERM_CC_FAT	GO:0005882~intermediate filament	9	5.66038	0.0012993	Q7Z794, Q03252, P48681, P13645, P20700, P08670, P35908, P17661, P41219	149	183	12782	4.21895	0.304232	0.0138546	1.70347
GOTERM_MF_FAT	GO:0015077~monovalent inorganic cation transmembrane transporter activity	7	4.40252	0.00137915	P13073, P06576, P31930, O75947, Q5QNZ2, P05023, P36543	153	104	12983	5.71148	0.436024	0.0616556	1.91668
GOTERM_CC_FAT	GO:0044430~cytoskeletal part	23	14.4654	0.00139024	P46940, P05062, P07951, P35579, P41219, Q03252, P40121, P48681, Q7Z794, P13645, P24844, P20700, Q7Z406, P08670, P35908, P67936, P68133, P17661, Q9UQE7, Q14847, P13796, P04792, Q16181	149	952	12782	2.07254	0.321687	0.014273	1.82169
SP_PIR_KEYWORDS	electron transport	6	3.77358	0.00141115	P19404, P31930, P38117, P21912, Q16795, P22695	159	100	19235	7.25849	0.398527	0.0152872	1.92076
GOTERM_BP_FAT	GO:0022900~electron transport chain	7	4.40252	0.00141149	P19404, P31930, P38117, P04179, P21912, Q16795, P22695	146	114	13528	5.6895	0.871385	0.0353417	2.31056
UP_SEQ_FEATURE	short sequence motif:Prevents secretion from ER	5	3.14465	0.00143697	P13667, P23284, P07237, P27797, P50454	159	59	19113	10.1871	0.655466	0.0518838	2.16142
GOTERM_BP_FAT	GO:0009310~amine catabolic process	6	3.77358	0.00148765	P00367, Q9UI17, Q6NVY1, P12694, P17174, P30038	146	78	13528	7.1275	0.884868	0.0365842	2.43378
GOTERM_CC_FAT	GO:0045111~intermediate filament cytoskeleton	9	5.66038	0.00149112	Q7Z794, Q03252, P48681, P13645, P20700, P08670, P35908, P17661, P41219	149	187	12782	4.1287	0.34054	0.0147591	1.95268
SP_PIR_KEYWORDS	coenzyme A	4	2.51572	0.00153208	P24752, P23786, Q96I99, P36957	159	28	19235	17.2821	0.424186	0.0161034	2.08376
GOTERM_MF_FAT	GO:0003779~actin binding	12	7.54717	0.00157445	P40121, P42704, Q7Z406, P07951, P04075, P67936, Q9Y4G6, Q14847, Q01995, P13796, P35579, P12821	153	326	12983	3.12354	0.479993	0.0632991	2.18533
GOTERM_BP_FAT	GO:0009205~purine ribonucleoside triphosphate metabolic process	7	4.40252	0.0016126	P06576, Q9UIJ7, P04075, O75947, Q5QNZ2, P05023, P36543	146	117	13528	5.54361	0.903997	0.0389399	2.63565
GOTERM_BP_FAT	GO:0009152~purine ribonucleotide biosynthetic process	7	4.40252	0.0016126	P06576, Q9UIJ7, P04075, O75947, Q5QNZ2, P05023, P36543	146	117	13528	5.54361	0.903997	0.0389399	2.63565
SMART	SM00268:ACTIN	4	2.51572	0.00164769	P62736, P68133, P60709, Q562R1	56	39	9079	16.6282	0.0836889	0.0836889	1.59602
GOTERM_BP_FAT	GO:0009199~ribonucleoside triphosphate metabolic process	7	4.40252	0.00168425	P06576, Q9UIJ7, P04075, O75947, Q5QNZ2, P05023, P36543	146	118	13528	5.49663	0.913499	0.0399724	2.75123
GOTERM_MF_FAT	GO:0005200~structural constituent of cytoskeleton	6	3.77358	0.0017331	P08670, P35908, P68133, P60709, P17661, Q9Y4G6	153	74	12983	6.88023	0.513179	0.0633463	2.40304
INTERPRO	IPR006821:Intermediate filament, DNA-binding region	3	1.88679	0.00177418	P08670, P17661, P41219	157	7	16659	45.475	0.505879	0.0958055	2.44377
SP_PIR_KEYWORDS	stress-induced protein	3	1.88679	0.00181739	P10809, P50454, P04792	159	8	19235	45.3656	0.480482	0.0185362	2.46733
GOTERM_CC_FAT	GO:0030016~myofibril	7	4.40252	0.00181837	P07951, P06733, P04075, P67936, P68133, P17661, P04792	149	111	12782	5.40988	0.398174	0.0173575	2.37648
SP_PIR_KEYWORDS	nadp	7	4.40252	0.00184235	P00367, O75874, Q08257, P14550, Q9UBQ7, P04040, P16152	159	156	19235	5.42836	0.485138	0.0182715	2.50082
SP_PIR_KEYWORDS	homotetramer	4	2.51572	0.00187606	P14618, P04040, P68871, P05091	159	30	19235	16.13	0.491361	0.0181048	2.54604
GOTERM_BP_FAT	GO:0006979~response to oxidative stress	8	5.03145	0.00192674	O75874, P04179, P22352, P02452, Q92626, P30086, P04040, P32119	146	164	13528	4.51988	0.939209	0.0448691	3.14142
GOTERM_MF_FAT	GO:0003857~3-hydroxyacyl-CoA dehydrogenase activity	3	1.88679	0.00198052	P40939, Q99714, Q16836	153	6	12983	42.4281	0.56077	0.0662634	2.74171
GOTERM_MF_FAT	GO:0004300~enoyl-CoA hydratase activity	3	1.88679	0.00198052	P30084, P40939, Q13011	153	6	12983	42.4281	0.56077	0.0662634	2.74171
GOTERM_BP_FAT	GO:0009144~purine nucleoside triphosphate metabolic process	7	4.40252	0.00199534	P06576, Q9UIJ7, P04075, O75947, Q5QNZ2, P05023, P36543	146	122	13528	5.31642	0.944984	0.0456991	3.25155
GOTERM_BP_FAT	GO:0006575~cellular amino acid derivative metabolic process	8	5.03145	0.00206769	Q9UI17, P80404, Q9UHG3, O75874, P04179, P22352, P07237, P19440	146	166	13528	4.46542	0.950481	0.0465847	3.36756
GOTERM_BP_FAT	GO:0009260~ribonucleotide biosynthetic process	7	4.40252	0.00216629	P06576, Q9UIJ7, P04075, O75947, Q5QNZ2, P05023, P36543	146	124	13528	5.23067	0.957099	0.0480103	3.52546
GOTERM_BP_FAT	GO:0031960~response to corticosteroid stimulus	6	3.77358	0.00217748	P05062, P12694, P17174, P02452, P30086, O60656	146	85	13528	6.54053	0.957792	0.0475281	3.54336
PIR_SUPERFAMILY	PIRSF002337:Actin	4	2.51572	0.00217752	P62736, P68133, P60709, Q562R1	117	17	7396	14.8738	0.220036	0.116844	2.44864
GOTERM_MF_FAT	GO:0016209~antioxidant activity	5	3.14465	0.00217854	P04179, P22352, Q92626, P04040, P32119	153	47	12983	9.02726	0.595491	0.0672533	3.01196
KEGG_PATHWAY	hsa00903:Limonene and pinene degradation	4	2.51572	0.00222962	P30084, P40939, P30837, P05091	100	14	5085	14.5286	0.208932	0.0193414	2.46924
GOTERM_BP_FAT	GO:0034446~substrate adhesion-dependent cell spreading	3	1.88679	0.00231303	O15230, P07942, P11047	146	7	13528	39.7104	0.965348	0.0496696	3.75999
GOTERM_MF_FAT	GO:0016620~oxidoreductase activity, acting on the aldehyde or oxo group of donors, NAD or NADP as acceptor	4	2.51572	0.00234627	P30038, Q02218, P30837, P05091	153	23	12983	14.7576	0.622749	0.0672628	3.24032
INTERPRO	IPR001557:L-lactate/malate dehydrogenase	3	1.88679	0.00235105	P40926, P00338, P07195	157	8	16659	39.7906	0.607204	0.110244	3.22633
INTERPRO	IPR001236:Lactate/malate dehydrogenase	3	1.88679	0.00235105	P40926, P00338, P07195	157	8	16659	39.7906	0.607204	0.110244	3.22633
GOTERM_CC_FAT	GO:0044420~extracellular matrix part	7	4.40252	0.00237382	P12109, O15230, P02452, P07942, P11047, Q9UQE7, P39059	149	117	12782	5.13245	0.484739	0.0218603	3.09193
GOTERM_CC_FAT	GO:0031988~membrane-bounded vesicle	16	10.0629	0.00242563	P98164, P02675, P04075, P30086, Q92820, Q9H4M9, P13667, P40121, P23284, P10809, P07237, P07339, P04843, P05023, P07996, P15144	149	568	12782	2.41649	0.492152	0.02162	3.15842
SP_PIR_KEYWORDS	heterotetramer	5	3.14465	0.00250314	P13645, P01857, P01859, P02042, P68871	159	69	19235	8.76629	0.594347	0.023464	3.38356
GOTERM_CC_FAT	GO:0001725~stress fiber	4	2.51572	0.00257577	Q7Z406, P68133, P35579, Q16181	149	24	12782	14.2975	0.513037	0.0222356	3.35086
SP_PIR_KEYWORDS	cell adhesion	11	6.91824	0.0026072	P12110, P12109, P55290, O15230, P43121, Q9Y6C2, P07942, P11047, P07996, O75309, P39059	159	422	19235	3.15337	0.609301	0.0238098	3.5219
GOTERM_CC_FAT	GO:0005606~laminin-1 complex	3	1.88679	0.00269193	O15230, P07942, P11047	149	7	12782	36.7651	0.528606	0.022532	3.4995
SP_PIR_KEYWORDS	respiratory chain	5	3.14465	0.00277797	P19404, P13073, P31930, Q16795, P22695	159	71	19235	8.51936	0.632657	0.0247257	3.74852
GOTERM_BP_FAT	GO:0009141~nucleoside triphosphate metabolic process	7	4.40252	0.0028528	P06576, Q9UIJ7, P04075, O75947, Q5QNZ2, P05023, P36543	146	131	13528	4.95117	0.984207	0.0600355	4.61809
GOTERM_CC_FAT	GO:0042995~cell projection	18	11.3208	0.00288897	P46940, P98164, O14745, P04083, P17174, P00338, P60709, P30086, Q07960, Q9Y4G6, P35579, P16444, Q5T2W1, P55290, Q7Z406, P08670, P13796, P00918	149	697	12782	2.2154	0.55389	0.0234613	3.75115
UP_SEQ_FEATURE	domain:Laminin EGF-like 9	3	1.88679	0.00292562	O15230, P07942, P11047	159	10	19113	36.0623	0.885944	0.0982194	4.35449
INTERPRO	IPR013328:Dehydrogenase, multihelical	3	1.88679	0.00300423	P31937, P40939, Q16836	157	9	16659	35.3694	0.697137	0.124289	4.10537
INTERPRO	IPR015955:Lactate dehydrogenase/glycoside hydrolase, family 4, C-terminal	3	1.88679	0.00300423	P40926, P00338, P07195	157	9	16659	35.3694	0.697137	0.124289	4.10537
GOTERM_BP_FAT	GO:0006734~NADH metabolic process	3	1.88679	0.00306239	P05062, P40926, P36957	146	8	13528	34.7466	0.988361	0.063393	4.94936
GOTERM_BP_FAT	GO:0006635~fatty acid beta-oxidation	4	2.51572	0.00324689	P23786, P30084, P40939, Q13011	146	28	13528	13.2368	0.991104	0.0661478	5.24007
GOTERM_BP_FAT	GO:0006749~glutathione metabolic process	4	2.51572	0.00324689	O75874, P04179, P22352, P19440	146	28	13528	13.2368	0.991104	0.0661478	5.24007
KEGG_PATHWAY	hsa05012:Parkinson's disease	9	5.66038	0.00325131	P19404, P13073, P06576, P31930, P21912, O75947, Q5QNZ2, Q16795, P22695	100	128	5085	3.57539	0.289612	0.0259604	3.58207
GOTERM_CC_FAT	GO:0032432~actin filament bundle	4	2.51572	0.00325335	Q7Z406, P68133, P35579, Q16181	149	26	12782	13.1977	0.597139	0.0256417	4.21493
GOTERM_CC_FAT	GO:0044455~mitochondrial membrane part	7	4.40252	0.00330227	P19404, P06576, P31930, O75947, Q5QNZ2, Q16795, P22695	149	125	12782	4.80397	0.602618	0.0253092	4.27703
GOTERM_MF_FAT	GO:0042802~identical protein binding	17	10.6918	0.00338224	P05062, P00367, P09467, Q9UIJ7, P04075, Q9Y6C2, P02452, Q99714, P07195, P04040, P35579, P05091, P80404, P55290, P07996, P13796, P04792	153	640	12983	2.25399	0.754881	0.0894751	4.63979
GOTERM_MF_FAT	GO:0051015~actin filament binding	5	3.14465	0.00338809	P42704, Q7Z406, Q14847, P13796, P35579	153	53	12983	8.0053	0.755476	0.0842645	4.64763
KEGG_PATHWAY	hsa00330:Arginine and proline metabolism	6	3.77358	0.00346151	P00367, P17174, Q03154, P30038, P30837, P05091	100	53	5085	5.7566	0.305171	0.0256711	3.80959
UP_SEQ_FEATURE	domain:Laminin EGF-like 8	3	1.88679	0.0035564	O15230, P07942, P11047	159	11	19113	32.7839	0.928638	0.113079	5.26983
UP_SEQ_FEATURE	domain:Laminin EGF-like 10	3	1.88679	0.0035564	O15230, P07942, P11047	159	11	19113	32.7839	0.928638	0.113079	5.26983
GOTERM_CC_FAT	GO:0042641~actomyosin	4	2.51572	0.00362925	Q7Z406, P68133, P35579, Q16181	149	27	12782	12.7089	0.637381	0.0270439	4.69119
GOTERM_MF_FAT	GO:0004029~aldehyde dehydrogenase (NAD) activity	3	1.88679	0.00364046	P30038, P30837, P05091	153	8	12983	31.8211	0.779873	0.085184	4.98568
GOTERM_BP_FAT	GO:0009150~purine ribonucleotide metabolic process	7	4.40252	0.00369697	P06576, Q9UIJ7, P04075, O75947, Q5QNZ2, P05023, P36543	146	138	13528	4.70002	0.995383	0.0739508	5.94574
SP_PIR_KEYWORDS	membrane protein	5	3.14465	0.00372515	P16444, P01857, P20700, P01891, P30086, P05534	159	77	19235	7.85551	0.739084	0.0322386	4.99655
GOTERM_BP_FAT	GO:0009165~nucleotide biosynthetic process	8	5.03145	0.00389773	P06576, Q9UIJ7, P00491, P04075, O75947, Q5QNZ2, P05023, P36543	146	186	13528	3.98527	0.996554	0.0767609	6.2589
SP_PIR_KEYWORDS	methylation	8	5.03145	0.003916	P62736, Q07955, O60814, P16403, P68133, P60709, P23246, P62805	159	242	19235	3.99917	0.756473	0.0330724	5.2462
KEGG_PATHWAY	hsa00053:Ascorbate and aldarate metabolism	4	2.51572	0.00399238	P16662, O60656, P30837, P05091	100	17	5085	11.9647	0.342979	0.0276142	4.382
SP_PIR_KEYWORDS	cytoplasm	42	26.4151	0.00403766	P62736, P07951, P17174, P06733, P27797, Q03154, P60709, P30086, Q9Y4G6, Q01995, P16152, P40121, P00491, Q08257, Q9UQ80, P17661, P32119, Q6NZI2, P04083, P78371, P00338, Q93088, P35237, Q07960, P07195, Q562R1, Q07955, Q5T2W1, Q8IUX7, P00558, O75874, P10809, P68133, P67936, P14618, Q14847, Q92597, P15144, P04792, P13796, P00918, Q16181	159	3332	19235	1.52489	0.766949	0.0333048	5.40501
GOTERM_MF_FAT	GO:0015078~hydrogen ion transmembrane transporter activity	6	3.77358	0.00407359	P13073, P06576, P31930, O75947, Q5QNZ2, P36543	153	90	12983	5.65708	0.816216	0.0898181	5.56323
SMART	SM00136:LamNT	3	1.88679	0.00409505	O15230, P07942, P11047	56	16	9079	30.3984	0.195459	0.103038	3.92445
UP_SEQ_FEATURE	domain:Laminin EGF-like 7	3	1.88679	0.0042446	O15230, P07942, P11047	159	12	19113	30.0519	0.957231	0.128065	6.25914
SP_PIR_KEYWORDS	actin-binding	8	5.03145	0.0043762	P40121, Q7Z406, P07951, P67936, Q14847, Q01995, P13796, P35579	159	247	19235	3.91821	0.793796	0.0352476	5.84566
GOTERM_BP_FAT	GO:0008217~regulation of blood pressure	6	3.77358	0.00439912	P62736, P80404, P04179, P05023, P68871, P12821	146	100	13528	5.55945	0.998341	0.0850732	7.03675
GOTERM_MF_FAT	GO:0009055~electron carrier activity	9	5.66038	0.00448126	P19404, P45954, Q9UHQ9, Q9UI17, P38117, P21912, P14550, P30038, P05091	153	221	12983	3.45568	0.844934	0.0934418	6.10386
GOTERM_CC_FAT	GO:0043256~laminin complex	3	1.88679	0.00454506	O15230, P07942, P11047	149	9	12782	28.5951	0.719438	0.0328932	5.84239
GOTERM_BP_FAT	GO:0034404~nucleobase, nucleoside and nucleotide biosynthetic process	8	5.03145	0.0047664	P06576, Q9UIJ7, P00491, P04075, O75947, Q5QNZ2, P05023, P36543	146	193	13528	3.84073	0.999029	0.0906564	7.6027
GOTERM_BP_FAT	GO:0034654~nucleobase, nucleoside, nucleotide and nucleic acid biosynthetic process	8	5.03145	0.0047664	P06576, Q9UIJ7, P00491, P04075, O75947, Q5QNZ2, P05023, P36543	146	193	13528	3.84073	0.999029	0.0906564	7.6027
GOTERM_BP_FAT	GO:0022904~respiratory electron transport chain	5	3.14465	0.00489051	P19404, P31930, P04179, P21912, Q16795	146	64	13528	7.23887	0.99919	0.0917133	7.79322
GOTERM_BP_FAT	GO:0001568~blood vessel development	9	5.66038	0.00489896	P06576, P55290, O15230, P02452, P15144, P07996, P35579, P12821, P39059	146	245	13528	3.40375	0.9992	0.0906971	7.80618
BIOCARTA	h_mta3Pathway:Downregulated of MTA-3 in ER-negative Breast Tumors	4	2.51572	0.00493109	Q5T2W1, P04075, P07339, P04792	36	15	1437	10.6444	0.245551	0.245551	4.78178
UP_SEQ_FEATURE	domain:Laminin EGF-like 4	3	1.88679	0.00498922	O15230, P07942, P11047	159	13	19113	27.7402	0.975431	0.143095	7.3187
UP_SEQ_FEATURE	domain:Laminin EGF-like 6	3	1.88679	0.00498922	O15230, P07942, P11047	159	13	19113	27.7402	0.975431	0.143095	7.3187
UP_SEQ_FEATURE	nucleotide phosphate-binding region:AMP	3	1.88679	0.00498922	P27144, P09467, Q9UIJ7	159	13	19113	27.7402	0.975431	0.143095	7.3187
UP_SEQ_FEATURE	binding site:AMP	3	1.88679	0.00498922	P27144, P09467, Q9UIJ7	159	13	19113	27.7402	0.975431	0.143095	7.3187
GOTERM_BP_FAT	GO:0009259~ribonucleotide metabolic process	7	4.40252	0.0050065	P06576, Q9UIJ7, P04075, O75947, Q5QNZ2, P05023, P36543	146	147	13528	4.41226	0.999316	0.0914367	7.97093
GOTERM_BP_FAT	GO:0006164~purine nucleotide biosynthetic process	7	4.40252	0.00519148	P06576, Q9UIJ7, P04075, O75947, Q5QNZ2, P05023, P36543	146	148	13528	4.38245	0.999478	0.0934885	8.25368
GOTERM_BP_FAT	GO:0001525~angiogenesis	7	4.40252	0.00519148	P06576, P55290, O15230, P15144, P07996, P35579, P39059	146	148	13528	4.38245	0.999478	0.0934885	8.25368
GOTERM_BP_FAT	GO:0030198~extracellular matrix organization	6	3.77358	0.00519408	P07585, P12110, Q9Y6C2, P02452, P11047, P50454	146	104	13528	5.34563	0.99948	0.0923912	8.25765
GOTERM_CC_FAT	GO:0009295~nucleoid	4	2.51572	0.00539229	P06576, P42704, P49411, P40939	149	31	12782	11.0691	0.778763	0.0379415	6.89593
GOTERM_CC_FAT	GO:0042645~mitochondrial nucleoid	4	2.51572	0.00539229	P06576, P42704, P49411, P40939	149	31	12782	11.0691	0.778763	0.0379415	6.89593
GOTERM_BP_FAT	GO:0006631~fatty acid metabolic process	8	5.03145	0.00547108	P45954, Q08AH3, P23786, P30084, P40939, Q13011, Q16836, Q68CK6	146	198	13528	3.74374	0.999653	0.0959162	8.67951
SP_PIR_KEYWORDS	nucleotide-binding	25	15.7233	0.00556441	P62736, P00367, Q9UIJ7, Q3LXA3, P60709, P30086, Q9H4M9, Q96I99, Q16822, P05023, Q9UQE7, P49411, P78371, Q68CK6, Q562R1, P35579, P27144, P06576, Q7Z406, P10809, P00558, Q08AH3, P68133, P14618, Q16181	159	1686	19235	1.79381	0.865848	0.0436579	7.37725
KEGG_PATHWAY	hsa04512:ECM-receptor interaction	7	4.40252	0.00559087	P12110, P12109, O15230, P02452, P07942, P11047, P07996	100	84	5085	4.2375	0.444945	0.0361244	6.08691
GOTERM_BP_FAT	GO:0001944~vasculature development	9	5.66038	0.00565226	P06576, P55290, O15230, P02452, P15144, P07996, P35579, P12821, P39059	146	251	13528	3.32238	0.999734	0.0977643	8.95445
GOTERM_BP_FAT	GO:0043648~dicarboxylic acid metabolic process	4	2.51572	0.00565968	P40926, P21912, P17174, P36957	146	34	13528	10.9009	0.999736	0.0967384	8.96569
SP_PIR_KEYWORDS	carbon-carbon lyase	3	1.88679	0.00571846	P05062, P04075, Q16822	159	14	19235	25.9232	0.873125	0.0438894	7.57412
GOTERM_MF_FAT	GO:0008237~metallopeptidase activity	8	5.03145	0.00574801	P16444, Q8IUX7, P08473, P31930, Q03154, P15144, P22695, P12821	153	183	12983	3.70956	0.908581	0.112738	7.76547
INTERPRO	IPR004000:Actin/actin-like	4	2.51572	0.00575077	P62736, P68133, P60709, Q562R1	157	39	16659	10.8829	0.898697	0.204643	7.72117
GOTERM_BP_FAT	GO:0006800~oxygen and reactive oxygen species metabolic process	5	3.14465	0.00575599	P04179, P22352, Q92626, P04040, P32119	146	67	13528	6.91474	0.999771	0.0971669	9.11151
GOTERM_MF_FAT	GO:0016684~oxidoreductase activity, acting on peroxide as acceptor	4	2.51572	0.00608524	P22352, Q92626, P04040, P32119	153	32	12983	10.607	0.920587	0.113632	8.20319
GOTERM_MF_FAT	GO:0004601~peroxidase activity	4	2.51572	0.00608524	P22352, Q92626, P04040, P32119	153	32	12983	10.607	0.920587	0.113632	8.20319
UP_SEQ_FEATURE	short sequence motif:Cell attachment site	5	3.14465	0.00612249	P12110, P12109, O15230, P02452, P07996	159	88	19113	6.82997	0.98944	0.166422	8.90982
GOTERM_MF_FAT	GO:0008092~cytoskeletal protein binding	14	8.80503	0.00627254	P05062, P07951, P04075, Q9Y4G6, Q01995, P35579, P40121, P42704, Q7Z406, P67936, P68133, Q14847, P13796, P12821	153	504	12983	2.35712	0.926561	0.111922	8.44546
PIR_SUPERFAMILY	PIRSF000102:Lac_mal_DH	3	1.88679	0.00642004	P40926, P00338, P07195	117	8	7396	23.7051	0.520132	0.217098	7.06298
GOTERM_BP_FAT	GO:0007568~aging	6	3.77358	0.00656992	P51888, P98164, P04179, P27797, Q99714, P30086	146	110	13528	5.05405	0.99993	0.108913	10.3351
GOTERM_BP_FAT	GO:0009062~fatty acid catabolic process	4	2.51572	0.00664871	P23786, P30084, P40939, Q13011	146	36	13528	10.2953	0.999938	0.108911	10.4527
GOTERM_CC_FAT	GO:0043232~intracellular non-membrane-bounded organelle	44	27.673	0.00682915	P46940, P62736, O60814, O14745, P07951, P04075, P60709, P30086, Q9Y4G6, P48681, Q7Z794, P40121, P0C0S5, P00491, P13645, P08670, O00264, Q9UQ80, P17661, Q9UQE7, P62805, P05062, P04083, P49411, P78371, P35579, Q562R1, P41219, Q03252, P06576, P42704, P16403, P20700, Q7Z406, P24844, P35908, P40939, P68133, P67936, Q92597, Q14847, P04792, P13796, Q16181	149	2596	12782	1.45399	0.852196	0.0466724	8.65779
GOTERM_CC_FAT	GO:0043228~non-membrane-bounded organelle	44	27.673	0.00682915	P46940, P62736, O60814, O14745, P07951, P04075, P60709, P30086, Q9Y4G6, P48681, Q7Z794, P40121, P0C0S5, P00491, P13645, P08670, O00264, Q9UQ80, P17661, Q9UQE7, P62805, P05062, P04083, P49411, P78371, P35579, Q562R1, P41219, Q03252, P06576, P42704, P16403, P20700, Q7Z406, P24844, P35908, P40939, P68133, P67936, Q92597, Q14847, P04792, P13796, Q16181	149	2596	12782	1.45399	0.852196	0.0466724	8.65779
GOTERM_BP_FAT	GO:0014823~response to activity	3	1.88679	0.00701839	P31930, P04179, P30086	146	12	13528	23.1644	0.999964	0.113357	11.0027
SP_PIR_KEYWORDS	Hydrogen ion transport	4	2.51572	0.00717635	P06576, O75947, Q5QNZ2, P36543	159	48	19235	10.0812	0.92519	0.0536719	9.41809
GOTERM_CC_FAT	GO:0009986~cell surface	11	6.91824	0.00725616	P06576, P55290, P02675, P10809, O00264, P07237, P27797, P30086, P07996, P04792, P12821	149	348	12782	2.7116	0.868907	0.0483494	9.17542
GOTERM_CC_FAT	GO:0001726~ruffle	5	3.14465	0.00752284	O14745, Q07960, Q9Y4G6, P13796, P35579	149	67	12782	6.40188	0.878374	0.0489247	9.49731
GOTERM_CC_FAT	GO:0042383~sarcolemma	5	3.14465	0.00752284	P04083, P12110, P12109, P17661, P05023	149	67	12782	6.40188	0.878374	0.0489247	9.49731
UP_SEQ_FEATURE	domain:Laminin N-terminal	3	1.88679	0.00755206	O15230, P07942, P11047	159	16	19113	22.5389	0.996366	0.194305	10.8806
GOTERM_BP_FAT	GO:0048514~blood vessel morphogenesis	8	5.03145	0.0076686	P06576, P55290, O15230, P15144, P07996, P35579, P12821, P39059	146	211	13528	3.51308	0.999986	0.121881	11.9622
SP_PIR_KEYWORDS	collagen	5	3.14465	0.00782395	P12110, P12109, Q9Y6C2, P02452, P39059	159	95	19235	6.3671	0.940851	0.0572087	10.2262
GOTERM_BP_FAT	GO:0006790~sulfur metabolic process	6	3.77358	0.00789708	P07585, O75874, P04179, P22352, P19440, Q93088	146	115	13528	4.83431	0.99999	0.123942	12.2971
KEGG_PATHWAY	hsa05016:Huntington's disease	10	6.28931	0.00796442	P19404, P13073, P06576, P31930, P04179, P21912, O75947, Q5QNZ2, Q16795, P22695	100	180	5085	2.825	0.568122	0.0481892	8.56744
SMART	SM00407:IGc1	4	2.51572	0.00798519	P01857, P01859, P13760, P01891, P05534	56	68	9079	9.53676	0.346174	0.132065	7.52392
INTERPRO	IPR008160:Collagen triple helix repeat	5	3.14465	0.00799494	P12110, P12109, Q9Y6C2, P02452, P39059	157	84	16659	6.31597	0.958694	0.251515	10.5812
GOTERM_BP_FAT	GO:0051262~protein tetramerization	4	2.51572	0.00831399	P04179, P22352, Q99714, P04040	146	39	13528	9.50334	0.999995	0.128687	12.9051
GOTERM_BP_FAT	GO:0034440~lipid oxidation	4	2.51572	0.00831399	P23786, P30084, P40939, Q13011	146	39	13528	9.50334	0.999995	0.128687	12.9051
GOTERM_BP_FAT	GO:0019395~fatty acid oxidation	4	2.51572	0.00831399	P23786, P30084, P40939, Q13011	146	39	13528	9.50334	0.999995	0.128687	12.9051
SP_PIR_KEYWORDS	pyruvate	3	1.88679	0.00840954	Q9UBQ7, P14618, P68871	159	17	19235	21.3485	0.952176	0.06016	10.9512
[truncated: 340 more rows]

## Sheet: Supplementary_Table_S4
Supplementary Table S4. Oxidoreductase (33 Proteins) in DAVID Analysis
[truncated: 34 more rows]

## Sheet: Supplementary Table S5
Supplementary Table S5. STRING Categories
[truncated: 88 more rows]

[truncated: 2 more sheets: Supplementary_Table_S6, Supplementary Table S7]
